# Supplementary material for: Defining murine monocyte differentiation into colonic and ileal macrophages
Source: eLife. 2020 Jan 8;9:e49998. doi: 10.7554/eLife.49998 (PMC6952180; doi:10.7554/eLife.49998)
Supplement: Source data 1. [file elife-49998-data1.xlsx]

## Sheet: Fig. 1D
Annotation/Divergence	Transcript/RepeatID	Kmeans cluster number	Monocytes 1 (2.42)	Monocytes 2 (2.81)	Monocytes 3 (1.94)	Colon 1 day 4 1 (1.79)	Colon 1 day 4 2 (2.96)	Colon 2 day 4 3 (2.03)	Colon 1 day 8 1 (3.38)	Colon 1 day 8 2 (2.61)	Colon 2 day 8 3 (1.17)	Colon 1 day 12 1 (3.11)	Colon 2 day 12 2 (1.22)	Colon day 12 3 (1.65)	Colon day 12 4 (1.95)	Resident Colon 1 (4.30)	Resident Colon 2 (2.07)	Resident Colon 3 (4.32)	Resident Colon 4 (2.86)	Ileum day 4 1 (9.22)	Ileum day 4 2 (2.13)	Ileum day 4 3 (7.13)	Ileum day 4 4 (3.30)	Ileum 1 day 8 1 (2.71)	Ileum 1 day 8 2 (3.37)	Ileum 2 day 8 3 (3.35)	Ileum 2 day 8 4 (3.40)	Ileum day 12 1 (3.76)	Ileum 2 day 12 2 (2.60)	Ileum day 12 3 (1.48)	Ileum day 12 4 (2.26)	Resident Ileum 1 (3.38)	Resident Ileum 2 (1.89)	Resident Ileum 3 (2.79)	Resident Ileum 4 (11.97)
Bid	NM_007544	1	9.88946	10.114	10.1162	7.00973	6.77204	7.01465	6.87696	7.24579	7.41405	7.03299	6.69491	7.13656	7.49501	8.09616	7.65138	8.16762	7.52824	6.0966	6.75011	6.74225	6.97657	6.77664	6.74561	6.69409	6.60854	6.62732	6.59692	6.95342	6.39163	7.1768	7.75708	7.6269	6.92887
Dnmt1	NM_001199431	1	10.258	9.86759	9.60819	7.34804	7.34567	7.18561	7.63358	7.53682	6.85227	7.2551	6.97189	6.91787	7.62869	7.84947	8.01671	8.05499	8.22472	7.55644	6.91233	7.41995	7.18733	7.20549	8.19336	7.95093	7.5649	7.31284	7.26677	6.95342	7.33034	8.05761	8.57276	8.23241	7.76574
Dusp22	NM_001037955	1	10.0661	9.97209	10.3926	7.16194	6.81066	7.03716	7.30431	7.1953	7.31148	7.34073	7.55198	7.04943	7.38172	8.60647	8.20044	8.54659	8.26556	7.15138	7.35006	7.47883	7.83472	7.80413	8.22622	7.76369	7.88832	7.37948	7.38368	7.58459	8.02542	8.5363	7.84272	8.13568	8.39818
Ezh2	NM_007971	1	9.51276	9.76893	9.25257	7.99059	7.65244	7.46005	7.55804	8.0009	7.87604	8.39436	7.79293	7.67968	7.96841	7.37611	7.83254	7.13646	7.81179	6.95104	7.82781	8.04422	7.79238	7.57719	7.63174	7.95093	7.71247	8.10595	7.51252	7.08494	7.46584	7.77535	8.49175	8.20543	7.18774
Fanca	NM_016925	1	8.98096	8.70638	8.76679	6.79366	6.31553	6.25616	6.38833	6.2984	6.24315	6.99827	6.72845	6.34582	6.95367	6.24422	6.98365	6.47362	6.66602	6.27888	6.53447	7.41995	7.15428	6.66545	7.72664	6.32405	6.33251	6.83155	6.81249	6.71026	6.96246	7.1768	7.11722	7.58564	7.18774
Foxm1	NM_008021	1	9.85214	9.44213	9.44131	6.88401	6.64959	7.03716	6.65323	6.56015	6.66529	7.06689	6.98583	6.48514	6.83572	6.6669	7.03007	6.32612	6.95952	5.88792	6.75011	7.35858	6.31678	6.6264	7.607	6.59768	6.65794	6.73304	6.87773	6.60462	6.31165	7.21014	7.84272	7.66701	7.0641
Hhex	NM_008245	1	9.27405	9.93946	10.151	6.04728	6.81066	6.25616	6.60401	6.71152	6.95111	6.59556	5.95843	6.66002	6.62431	7.67829	7.83254	8.12362	7.33706	5.64386	6.19936	7.78904	7.34214	7.23175	6.83352	6.91019	6.33251	7.05187	6.99998	7.06913	6.88166	7.5852	7.35231	6.96837	7.18774
Jarid2	NM_021878	1	9.55518	9.57017	9.60819	7.85196	7.73507	8.03057	7.7513	7.82942	7.84699	8.19418	7.65149	7.3987	7.91124	8.18412	8.35431	8.65875	8.33118	8.17801	7.90694	8.35826	7.79238	7.9217	8.38011	7.64811	6.92332	7.93923	8.0959	7.43236	8.14563	8.30904	8.44557	8.29773	7.84301
Mafg	NM_010756	1	10.2694	10.5411	10.4813	8.58267	8.04139	8.70054	8.94358	8.90864	8.60082	8.83894	8.45993	8.54401	8.87766	9.45888	9.17916	9.773	9.47478	9.40236	8.60531	9.1744	9.00993	8.9891	9.36668	8.53628	8.58149	8.7214	8.74682	8.37687	9.0742	9.22361	9.2514	9.32339	9.11086
S100a11	NM_016740	1	11.4996	11.3637	11.0241	10.0848	10.1672	9.47347	10.1035	10.477	9.67968	9.69971	10.4064	10.5552	10.6147	9.71658	10.0746	9.74423	10.3106	8.13135	9.80299	9.06339	8.80155	8.89366	8.1078	8.81882	9.01966	9.22577	9.74144	8.89884	8.56331	9.7338	10.6841	9.66285	9.41912
Anln	NM_028390	1	8.78896	9.07258	8.44455	7.04931	6.95553	6.53454	6.55304	6.78164	6.74616	7.10001	6.99963	6.25527	6.76002	6.24422	6.54615	6.54209	6.99234	6.27888	7.21147	7.78904	6.37533	6.16364	7.17383	7.13293	6.55741	6.87838	7.11268	6.77012	5.93829	6.99751	7.26636	7.38384	6.77963
Arl8a	NM_026823	1	8.93173	9.35205	8.81102	7.44025	6.81066	7.61773	8.05592	8.16729	7.59087	7.2551	6.90013	6.91787	8.08674	8.66878	8.14879	8.59573	7.98486	8.13135	7.65521	7.69287	7.55972	7.37998	8.22622	7.09812	7.18155	7.59112	7.31468	7.66036	7.88048	7.90313	8.15163	7.6269	7.30162
Aspm	NM_009791	1	8.88076	8.50931	8.72776	6.94824	6.98959	6.09383	6.32896	6.56015	6.32966	6.85039	7.01329	6.01888	7.10411	6.5393	6.54615	6.24629	6.66602	5.64386	6.72121	7.83484	6.58831	6.81188	6.83352	7.06243	6.27034	6.62732	6.59692	6.31421	6.26993	6.79274	6.88317	7.12055	7.0641
Aurka	NM_011497	1	9.16264	8.96324	8.91891	7.04931	6.60635	6.82066	6.32896	7.0323	6.26527	6.8888	7.02683	6.58765	7.60004	7.08764	7.09701	6.66998	6.92593	6.71832	7.14773	7.83484	6.85839	6.70347	7.77185	7.41339	6.27034	7.13137	6.97037	6.58253	6.67344	7.33625	8.36515	8.17794	7.50549
Aurkb	NM_011496	1	10.6262	10.6759	10.5388	7.49862	6.88492	6.96854	7.1064	7.51641	7.11842	7.16406	7.25107	6.99451	7.87582	7.25947	7.40947	7.09148	7.67697	6.44069	7.4765	8.26098	7.28219	7.30777	7.67997	7.49594	7.07647	7.59112	6.87773	7.00414	6.73606	7.1768	8.34852	8.2589	7.59756
Bin3	NM_021328	1	9.36694	9.47095	9.77061	7.72327	7.5648	7.83887	7.81759	7.95611	8.14419	7.66235	7.27396	7.78052	7.97958	8.6223	8.5422	8.2721	8.13937	7.48402	7.38734	7.92227	7.65733	8.18623	8.49241	7.62384	7.66493	8.1255	7.98183	7.60665	8.24587	8.3693	8.17068	7.86964	7.98614
Birc5	NM_001012273	1	11.0353	10.6358	10.4517	8.65501	8.67495	8.06384	7.58366	8.29264	8.23104	8.76858	8.91065	7.88487	9.17831	8.00248	8.53417	7.30353	8.27893	8.74099	8.49865	9.47837	8.43942	8.17274	9.17806	9.05498	8.65631	8.86786	8.64743	7.41995	7.88048	8.76658	9.69474	9.6479	7.91635
Bub1	NM_001113179	1	7.49804	8.45264	7.8708	6.69727	6.20393	6.13617	5.91001	6.24975	5.94729	6.64129	6.84004	6.431	6.50573	6.24422	6.3032	5.76339	6.24363	5.64386	6.88653	7.35858	6.31678	6.74052	6.32805	6.59768	5.82774	6.83155	6.43294	6.14366	6.76638	6.55401	6.83621	7.38384	6.20842
Bub1b	NM_009773	1	9.92224	9.55948	9.45332	7.17989	7.17859	6.92091	6.5002	7.0323	6.73035	6.9627	6.92927	6.28609	7.33031	6.47099	7.03007	6.72991	7.50568	6.95104	6.93766	8.12015	7.28219	7.61758	8.01685	7.52245	6.79671	7.37948	6.90927	6.46671	7.88048	7.53347	8.18949	8.04728	7.59756
Bub3	NM_009774	1	10.6611	10.7436	10.6404	8.69923	8.12036	8.15929	8.3822	8.66144	8.32881	8.31194	8.26232	8.07333	9.10372	9.08905	8.97481	8.47834	8.84398	7.6254	8.6366	8.85697	8.78004	8.28984	8.12533	8.59988	7.86748	8.85621	8.63804	7.99736	8.05028	8.83227	9.3508	9.04007	8.49711
Ccna2	NM_009828	1	10.1819	10.9522	10.6733	8.59609	8.13565	7.24483	7.60883	8.55536	7.87604	9.08213	8.6513	7.59607	9.01967	7.61639	8.30796	7.41726	8.46581	7.87235	8.42886	8.81189	7.93545	7.67612	8.35062	8.46975	7.71247	8.454	8.0112	7.52792	7.80946	8.64997	9.61004	9.5917	7.76574
Ccnb1	NM_172301	1	9.08756	9.23596	8.94183	7.28311	6.98959	6.40206	6.5002	7.14299	6.95111	7.34073	6.91477	6.58765	7.77687	6.94386	6.88607	6.47362	7.36239	6.0966	7.33106	7.74176	6.85839	6.41349	6.60281	6.73998	7.51216	7.31284	7.13953	6.39247	6.39163	7.36613	8.46885	7.9531	6.42494
Ccnb2	NM_007630	1	10.8641	10.7878	10.5996	8.55543	8.49699	7.79991	8.03749	8.49403	8.03255	8.25426	8.67299	7.91476	9.00335	7.51828	8.23057	7.65222	8.07954	6.71832	8.29798	8.78881	7.93545	7.37998	8.54544	8.88158	7.96882	8.454	8.23934	7.88454	8.08678	8.35447	9.49382	8.84409	7.6841
Ccnd3	NM_001081636	1	12.7089	12.5126	12.638	9.22947	8.61076	9.14076	9.33918	8.96247	8.59209	8.39436	8.59332	8.8215	9.47906	9.63308	9.85369	9.66968	9.99551	8.57659	8.65963	9.52101	8.94376	8.89366	8.70545	9.04587	8.15235	8.89089	8.82334	8.73328	8.3396	9.3635	9.78095	9.61239	9.63002
Ccne1	NM_007633	1	8.66533	8.40565	7.78468	6.83954	6.31553	6.00527	6.44535	6.59951	6.22068	6.77034	6.79327	6.01888	6.97615	6.47099	6.54615	5.97629	6.49334	5.88792	6.72121	7.41995	6.48575	6.31868	6.69957	6.26251	6.06596	6.68114	6.90927	6.25957	6.18269	6.74805	7.43343	6.86871	6.77963
Ccnf	NM_007634	1	9.21649	8.87111	8.72776	6.3304	6.60635	6.46982	6.20238	6.4352	5.89149	6.449	6.16848	5.86409	6.44256	5.76291	6.34051	6.16179	6.62474	6.44069	6.43119	7.08309	6.48575	6.26883	6.69957	6.59768	5.9116	6.68114	6.19769	6.05018	6.13701	6.74805	7.36891	6.93591	7.30162
Cdc20	NM_023223	1	9.56444	9.20198	9.30212	7.37944	6.73236	6.82066	6.65323	7.86215	7.05635	7.22539	7.28527	6.72893	8.22453	7.08764	7.79271	6.40175	7.55045	6.44069	7.10362	7.47883	7.18733	6.41349	7.42088	7.35561	6.79671	6.92376	7.33805	6.68973	5.93829	7.98244	9.24243	8.66753	7.59756
Cdc25b	NM_023117	1	9.18081	8.75406	8.85997	7.10673	7.14876	7.20562	6.74693	7.0887	6.74616	6.85039	7.27396	6.99451	7.39846	7.08764	7.51115	7.04505	7.69702	7.48402	6.66161	7.15704	6.85839	6.50246	7.44898	7.44143	7.11236	7.69943	7.53292	6.95342	6.60798	7.33625	8.12257	7.64709	7.0641
Cdc25c	NM_009860	1	8.69934	8.62666	8.06074	6.594	6.81066	6.25616	6.20238	6.88081	6.63163	6.99827	6.71177	6.5373	7.14435	6.47099	6.54615	6.07202	6.82022	6.0966	6.86026	6.53596	6.37533	6.58625	6.83352	6.98832	6.27034	6.87838	6.63516	6.17353	6.31165	6.83609	7.59729	7.33488	6.42494
Cdc45	NM_009862	1	8.88076	8.79109	8.46842	6.72199	6.1447	6.17728	6.38833	6.4352	6.10278	6.85039	6.67785	6.75118	6.59556	5.76291	6.1006	6.07202	6.07002	5.64386	6.59944	6.42058	6.43159	5.98993	6.74561	6.43981	5.64386	6.68114	6.29644	6.20277	5.99059	6.13525	6.68542	6.33355	5.95359
Cdc6	NM_001025779	1	8.11709	8.08615	7.05871	6.39328	6.36826	5.86131	6.13465	6.0369	6.02713	6.16585	6.01389	6.51145	6.37652	5.97506	6.60866	5.97629	6.49334	5.88792	6.43119	7.41995	6.19204	6.36686	6.13393	6.38308	6.27034	6.38933	6.19769	6.17353	6.18269	6.79274	7.13672	7.12055	6.20842
Cdca2	NM_001110162	1	9.02187	8.73517	8.52263	6.90574	6.56177	6.36695	6.32896	6.59951	6.26527	6.92622	6.67785	6.15866	6.73388	6.78414	6.7261	6.24629	6.39857	6.0966	6.59944	7.58981	6.85839	6.50246	7.20712	7.23259	6.65794	6.87838	6.94014	6.20277	6.60798	7.03519	7.58314	7.47703	6.92887
Cdca3	NM_013538	1	11.1944	11.0661	10.8548	8.84694	8.84271	8.08561	8.01883	8.88495	8.57448	8.85843	9.07283	8.36794	9.53312	8.52459	8.93877	7.71287	9.01345	7.75415	8.70462	9.13834	8.54521	8.3865	8.97075	9.24996	9.05697	8.75943	8.64743	8.03851	8.14563	8.86403	10.2526	9.74945	7.91635
Cdca5	NM_026410	1	9.35631	9.26258	8.3449	6.83954	6.64959	6.09383	6.44535	6.8485	6.45042	7.10001	6.64309	6.93743	7.06269	6.5393	6.51385	6.16179	7.05581	5.88792	6.59944	7.29448	6.81675	7.03703	7.03239	7.78574	6.55741	7.20672	6.47572	6.51415	6.8537	6.74805	7.94585	8.01657	6.42494
Cdca8	NM_026560	1	11.1489	10.9825	10.7532	8.23332	8.04139	7.98498	7.63358	8.16729	7.42392	7.99726	8.21578	7.62046	8.91304	7.61639	8.13823	7.52268	8.18267	7.75415	8.06481	8.66752	8.0296	7.47098	8.6215	8.28088	8.18641	8.30766	7.79179	6.75043	7.57265	8.19713	9.67486	9.13607	7.6841
Cdk1	NM_007659	1	10.0129	10.1358	9.69506	8.45584	7.99184	7.52521	8.01883	8.37433	7.7871	8.32601	8.5234	7.84403	8.72678	7.61639	8.26008	7.41726	8.65192	7.6254	8.30773	8.92205	8.20126	8.08904	8.54544	8.86096	8.37545	8.39078	8.12306	7.77193	7.65598	8.87447	9.59249	9.34827	7.84301
Cdkn2c	NM_001301368	1	8.78896	8.89682	8.88384	6.53944	6.51576	6.17728	6.26707	6.47807	6.12716	6.28586	6.11877	6.12497	6.95367	5.97506	6.44698	6.24629	6.44674	6.0966	6.15682	6.53596	6.81675	6.70347	6.55189	6.49437	7.07647	6.18092	6.99998	6.41765	6.67344	6.13525	6.71167	6.64602	6.77963
Cdkn2d	NM_009878	1	10.6107	11.1015	11.0079	7.37944	6.69158	7.14473	6.87696	7.29457	7.13052	6.77034	7.15569	7.03136	7.46353	5.76291	6.05643	5.87376	5.72421	6.83937	7.05812	7.22739	6.85839	7.17874	7.36297	7.06243	6.84016	7.16953	6.70873	6.82759	6.5741	5.64386	5.84699	5.79629	5.95359
Cdkn3	NM_028222	1	9.1067	8.83609	8.68765	7.45507	7.23645	6.74063	6.79159	7.14299	6.82274	7.88772	7.51402	7.15338	7.8272	6.5393	7.3918	6.40175	7.11662	6.0966	7.19054	7.15704	6.77386	6.41349	7.03239	7.26435	7.00193	6.38933	6.38886	6.60462	6.76638	6.99751	7.31854	7.38384	5.95359
Cdt1	NM_026014	1	9.66685	9.65801	9.25257	7.26641	7.02286	7.33844	7.60883	7.65361	7.2125	7.47305	7.02683	7.45403	7.96841	7.82232	7.72378	7.77108	8.00108	6.83937	7.23209	7.96408	7.79238	7.44876	7.47655	7.44143	6.84016	7.69943	7.57287	7.16143	7.22512	8.02051	8.55112	8.31045	7.50549
Cenpe	NM_173762	1	9.24556	9.4992	9.14805	7.31594	7.34567	7.01465	6.74693	6.9124	7.01778	7.47305	7.05355	6.45833	7.36478	6.83937	6.69762	6.78745	6.95952	6.0966	7.68545	8.26098	7.34214	7.23175	7.65605	7.16692	7.64057	7.64629	6.77872	6.49063	6.88166	6.95882	7.66603	7.49942	6.92887
Cep55	NM_028760	1	8.15436	8.45264	8.45255	6.79366	6.73236	6.17728	6.32896	6.2984	6.17467	6.59556	6.84004	6.22379	6.90764	6.15995	6.66857	6.40175	6.49334	5.88792	6.50087	7.08309	6.58831	6.10804	6.26621	6.49437	6.13734	6.62732	6.43294	6.08202	6.67344	6.55401	7.24854	7.12055	6.20842
Chaf1a	NM_013733	1	9.22819	8.69665	8.07117	7.0687	6.98959	6.56586	6.91783	6.88081	6.54387	6.92622	6.80903	6.87798	7.14435	6.6045	6.98365	6.99708	7.23105	7.75415	6.63086	7.96408	7.01391	7.20549	7.67997	7.44143	6.84016	7.01042	6.94014	6.34078	6.43002	7.63514	8.14201	7.86964	7.59756
Ckap2	NM_001004140	1	9.11932	9.17421	8.61107	7.16194	6.77204	6.84639	6.44535	6.94332	6.97814	6.85039	7.48489	6.63629	7.67064	6.39929	6.78143	6.40175	6.92593	7.32727	7.33106	7.08309	6.72966	6.74052	6.99475	7.67198	7.53877	7.09218	6.81249	6.6478	6.18269	6.87816	7.85455	7.6269	6.77963
Ckap5	NM_029437	1	9.01513	9.08754	8.58219	7.59539	7.5189	7.30172	7.39394	7.36477	6.97814	7.59424	6.95782	6.95671	7.93438	7.84947	7.92142	7.85421	7.86592	6.95104	7.33106	7.58981	7.37119	7.30777	8.19336	7.71856	7.34126	7.47401	7.21721	7.14645	7.22512	7.86178	8.43773	7.9531	7.30162
Cks1b	NM_016904	1	10.2116	10.062	9.93669	7.55471	7.02286	7.05932	7.14133	7.24579	6.92355	7.66235	7.47504	7.11955	8.04483	7.61639	7.89658	7.5889	7.95187	7.15138	7.08105	8.26098	7.55972	7.47098	8.36544	7.62384	7.00193	7.82431	7.2422	6.97052	7.83829	8.30904	8.89833	8.57571	8.11634
Clasp1	NM_001293300	1	8.22612	8.18686	8.01824	7.00973	6.69158	7.40919	6.32896	7.06077	6.85227	6.7286	6.85529	7.04943	7.25877	7.08764	7.07504	7.71287	7.02442	6.0966	6.80623	6.92271	7.18733	6.9127	7.42088	6.26251	5.9116	6.96773	7.21721	6.78953	7.03896	7.30574	7.33552	7.25819	7.0641
Clspn	NM_175554	1	8.03954	8.36937	7.89448	6.48274	6.41912	6.43635	6.32896	6.39103	6.17467	6.449	6.3518	6.12497	6.44256	5.97506	6.51385	6.24629	6.24363	5.64386	6.31992	7.22739	6.63699	6.0502	6.4443	6.13091	5.99084	6.57139	6.38886	6.41765	6.46741	6.44624	7.26636	6.96837	5.95359
Cntrl	NM_012018	1	9.71753	9.62249	9.56825	7.99059	8.04139	7.37425	7.99992	7.98612	8.04538	8.04907	7.49466	7.57127	7.68436	7.82232	8.08426	8.46076	8.06418	7.81446	8.31742	8.41964	8.15187	8.30228	7.67997	7.93129	7.61578	8.14478	8.03999	7.98899	8.25659	8.27795	8.02126	8.36023	8.0527
Dbf4	NM_013726	1	8.80467	9.29517	8.7474	7.39488	6.81066	6.8965	6.83491	7.47469	7.00468	7.6173	7.43497	6.431	7.51049	6.94386	7.1817	6.94746	7.08654	7.15138	7.40562	7.69287	7.21965	6.84627	6.652	7.35561	6.75193	7.20672	7.08532	6.80868	7.13504	7.45222	7.93475	7.78104	6.92887
Dlgap5	NM_144553	1	9.1928	8.85371	8.57488	6.72199	6.95553	6.13617	6.44535	6.4352	6.37105	6.28586	5.98643	6.37478	7.16406	6.6669	6.66857	6.24629	6.34875	7.15138	6.39505	7.15704	6.58831	6.36686	7.06907	6.94979	6.65794	6.68114	6.38886	6.08202	6.79608	7.14268	7.31854	6.93591	6.61316
E2f2	NM_177733	1	11.8245	11.596	11.4854	8.45584	7.1183	8.74224	7.90148	8.25617	7.25733	7.96167	7.53313	7.21873	8.74653	7.79464	8.39034	7.88089	8.26556	7.98159	7.67041	7.92227	8.16852	7.75065	8.49241	8.28088	7.75848	8.55837	8.13645	7.80091	7.42841	8.54938	9.33822	9.13607	8.0527
E2f7	NM_178609	1	8.19069	7.92886	7.50585	6.23063	5.80552	5.95887	5.98884	6.09312	5.94729	5.96475	5.95843	5.86409	6.23458	5.97506	5.86485	5.87376	5.94146	6.58616	5.92303	6.15779	6.25575	6.21719	6.652	6.1982	6.39209	6.51322	6.51726	6.14366	5.93829	6.20304	6.81215	6.47581	5.95359
E2f8	NM_001013368	1	9.47399	9.76893	9.61534	7.19761	6.84826	6.53454	6.55304	7.00324	6.56186	6.8888	6.90013	6.68336	7.47935	6.6669	6.95987	6.72991	6.78318	6.83937	6.72121	7.58981	7.18733	6.66545	6.79024	6.69409	7.07647	7.27833	6.97037	5.98432	6.46741	7.21014	7.95687	7.68665	5.95359
Ep300	NM_177821	1	9.30752	9.63273	9.76741	8.13556	8.33424	8.16951	7.96135	8.18032	8.25887	8.0826	7.62502	7.96323	8.17682	8.57428	8.50159	9.18296	8.48899	7.6254	8.3366	8.74151	8.32525	8.47709	7.7035	7.89118	6.65794	8.37454	8.26395	8.0466	8.22419	8.69775	8.43773	8.60697	8.39818
Ercc6l	NM_146235	1	7.99915	8.02527	7.77194	6.23063	6.2608	6.09383	6.20238	6.1994	6.02713	6.03494	5.71249	5.98172	6.15801	6.15995	6.22554	6.07202	6.24363	5.64386	5.81775	6.53596	5.9046	6.16364	6.55189	6.73998	5.99084	6.32315	6.0917	5.87951	5.99059	6.2678	6.63142	6.52028	6.20842
Fam64a	NM_144526	1	9.40866	9.09497	8.77319	6.48274	6.51576	6.21727	6.32896	6.2984	6.41129	6.16585	5.98643	6.15866	6.34232	6.24422	6.4808	6.07202	6.53848	5.64386	6.31992	6.92271	6.63699	6.50246	7.36297	6.13091	5.64386	6.83155	5.853	6.23145	6.39163	6.44624	6.60366	6.47581	5.95359
Fbxo5	NM_025995	1	8.69934	9.55948	9.10809	6.79366	7.39732	6.82066	6.83491	6.4352	6.68184	7.06689	6.99963	6.77311	7.34765	6.32384	6.88607	6.66998	6.58225	6.44069	6.75011	7.58981	6.53795	6.54496	6.32805	6.6467	6.06596	7.16953	6.94014	6.53731	6.26993	6.91905	7.47999	7.45429	6.77963
Fzr1	NM_019757	1	9.98219	9.62249	9.57925	8.25041	8.49699	8.64299	8.70761	8.76026	8.16198	8.09907	8.01979	8.05556	8.88955	8.68395	8.838	8.57953	8.84398	9.09716	7.88104	8.47852	7.93545	7.87248	9.09156	8.37113	7.14737	7.61897	7.82525	7.90248	7.90794	8.46905	9.15903	8.89564	8.79808
Gmnn	NM_020567	1	10.0364	10.0352	9.44131	8.36464	8.02506	7.47662	8.05592	8.5352	7.9598	8.47232	7.91446	7.95367	8.45803	7.73764	8.25031	7.79933	8.66216	7.15138	8.18609	8.41964	8.08328	7.67612	8.43736	7.91137	7.42924	8.10595	7.95184	7.02067	7.71935	8.21366	9.21056	8.57571	7.6841
H2afx	NM_010436	1	12.8786	12.7703	12.6607	9.4377	8.72635	8.71457	8.50797	9.41813	8.56113	8.85843	9.1645	8.49209	9.63551	8.66878	9.12672	8.35055	9.06835	7.81446	8.94855	9.86791	9.13381	8.78259	9.68295	9.58146	9.40677	8.95784	9.3282	8.24245	8.64717	9.32598	10.4252	9.99767	8.11634
Haus4	NM_145462	1	9.36694	9.43044	9.03537	7.9176	7.69435	7.42634	7.58366	7.82942	7.77173	7.76917	7.37271	7.4404	8.01257	7.64767	7.84558	7.09148	8.00108	7.81446	7.2725	7.47883	7.18733	7.49285	8.28976	7.98944	7.53877	7.72529	7.74009	7.26215	7.71935	8.05761	8.24447	8.10681	7.40715
Haus5	NM_027999	1	9.00836	8.8883	8.76679	7.02966	6.41912	6.74063	7.03391	7.00324	6.90957	7.28422	7.05355	6.89806	7.25877	7.61639	7.26168	7.48839	7.25829	6.27888	6.69172	7.53538	7.48192	7.87248	7.87903	7.69546	6.65794	7.20672	7.82525	7.19093	7.01391	7.45222	7.65254	7.54317	6.92887
Hcfc1	NM_008224	1	9.89681	9.76893	9.69506	8.21603	7.34567	8.03057	8.32259	8.10027	8.10792	8.19418	7.73635	7.82317	8.65197	8.22617	8.24048	8.33133	8.26556	7.32727	8.07627	8.50709	8.11798	7.87248	8.33564	8.02694	7.53877	8.21945	7.33805	7.49282	7.70377	8.35447	8.5365	8.50001	8.17728
Incenp	NM_016692	1	10.7224	10.3464	10.1485	8.20731	7.99184	7.75986	7.81759	7.97119	7.72461	8.14741	7.42478	7.3987	8.40102	7.92801	7.80611	7.95809	8.23846	8.30955	7.96972	8.94311	8.11798	8.19959	8.71705	8.24949	7.53877	8.454	7.95184	7.51632	8.14563	7.92338	8.64946	8.47764	7.76574
Kif11	NM_010615	1	10.0298	10.1394	9.62599	7.55471	7.26455	6.6265	7.1064	7.14299	6.93739	7.80978	6.99963	6.431	7.65679	6.72671	7.26168	6.66998	7.11662	6.95104	7.62432	7.87922	7.45502	7.4262	7.7035	7.26435	7.07647	7.53375	7.02899	6.66893	6.82518	7.53347	8.24447	8.46632	7.0641
Kif18b	NM_197959	1	8.88815	8.82721	8.64638	6.36217	6.2608	6.6265	5.82665	6.24975	6.15111	6.6856	6.23999	5.90436	6.70726	6.24422	6.4808	6.40175	6.29715	6.27888	6.39505	6.92271	6.19204	6.16364	6.4991	5.98609	5.9116	6.32315	5.91648	6.01763	6.04107	6.60502	6.97274	6.93591	6.77963
Kif20b	NM_183046	1	8.24927	8.58508	8.61107	7.26641	6.92065	6.7678	6.55304	6.747	6.90957	7.10001	7.30764	6.97573	7.08355	6.72671	6.69762	6.47362	7.17497	6.0966	7.56049	7.74176	7.12045	7.33224	6.20159	6.98832	6.65794	7.41169	6.90927	6.44238	6.93603	6.95882	7.43343	7.6269	7.18774
Kif23	NM_024245	1	10.1141	9.95994	9.56825	7.85196	7.5648	7.42634	7.60883	7.55696	7.47226	8.25426	7.8165	7.37023	8.30664	7.97808	7.89658	7.34245	7.67697	7.15138	7.89405	8.71727	7.58475	7.7687	8.46515	8.1846	7.11236	8.025	7.55303	7.53944	7.42841	8.49632	9.11544	8.75387	7.59756
Kif2c	NM_001290662	1	9.39834	8.74465	8.70784	6.72199	6.81066	6.33095	6.32896	6.747	6.30852	6.34232	5.98643	6.15866	6.97615	6.72671	6.93568	6.72991	6.92593	5.64386	6.43119	7.58981	6.89887	7.23175	7.97879	6.94979	6.55741	7.05187	6.67241	6.11316	6.76638	6.74805	7.67939	7.35957	7.0641
Knstrn	NM_026412	1	9.92583	9.69756	9.53848	7.88515	7.5189	6.99178	6.74693	7.24579	7.14252	7.70603	7.77699	7.23462	8.27978	7.25947	7.70959	7.13646	7.8481	7.928	7.59276	8.44938	7.65733	7.17874	7.95938	8.0635	7.64057	7.69943	7.72245	7.17626	6.76638	7.47982	8.88108	8.23241	6.61316
Lig1	NM_010715	1	9.97873	9.62762	9.17248	8.06006	7.67355	7.92589	7.72852	8.14086	7.30082	8.06593	7.8165	7.92458	8.22453	7.61639	8.15927	7.48839	8.39394	7.6254	7.80044	8.8346	8.08328	7.33224	8.92145	8.1846	8.33046	8.27302	7.74009	7.56219	7.78005	8.49632	9.11052	9.11448	8.17728
Lin9	NM_001103182	1	7.99915	8.10097	7.97446	6.48274	6.2608	5.95887	6.32896	6.39103	6.46961	6.49953	6.33013	6.45833	6.68014	6.72671	6.51385	6.47362	6.66602	6.27888	6.56732	6.64279	6.58831	6.45866	6.79024	6.26251	6.75193	6.83155	6.59692	6.14366	6.39163	7.21014	6.99429	6.86871	5.95359
Mapk7	NM_001291036	1	8.96707	8.98737	8.91313	7.19761	6.60635	6.92091	7.03391	7.14299	6.85227	6.8888	6.58936	6.45833	6.95367	7.61639	7.63646	8.14579	7.79328	6.58616	6.72121	7.41995	7.28219	6.87987	7.39221	6.59768	6.50438	7.27833	7.33805	7.17626	6.79608	7.47982	7.46464	7.40771	6.42494
Mcm2	NM_008564	1	9.2684	9.03447	8.51501	7.51285	7.26455	7.01465	7.60883	7.36477	6.71436	7.49811	6.84004	6.99451	7.81478	7.51828	7.65138	7.5889	8.01711	7.15138	7.14773	7.92227	7.45502	6.87987	7.79393	7.20013	6.55741	7.31284	7.40597	7.00414	6.93603	7.63514	8.63582	8.2849	7.84301
Mcm3	NM_008563	1	10.2694	9.87192	9.48488	7.59539	7.5189	7.55671	7.81759	7.47469	6.89546	7.6173	7.65149	7.37023	7.92286	8.18412	8.43415	8.33133	8.50044	7.87235	7.68545	9.26081	8.11798	8.08904	8.95123	7.8707	7.78095	7.64629	7.96691	7.79131	7.92148	8.60055	9.01361	8.71613	7.59756
Mcm4	NM_008565	1	8.8508	9.4363	8.76035	7.71098	6.92065	6.71293	7.42262	7.43171	6.7618	7.39512	7.19219	6.81597	7.64281	7.41298	7.44417	7.65222	7.9181	6.27888	7.2725	8.29414	7.58475	7.00694	7.23967	7.41339	6.27034	7.50419	8.06821	6.86467	7.46584	7.94333	8.40592	8.17794	7.59756
Mcm5	NM_001302540	1	10.549	10.5329	10.1362	8.15384	7.83211	7.71868	7.81759	7.69053	7.0436	7.84927	7.83971	7.99156	8.3503	7.9023	8.23057	7.74227	8.51181	7.6254	7.78656	9.32639	7.83472	7.49285	8.24237	7.76369	7.73565	8.00402	7.79179	7.27598	7.70377	8.45521	9.14465	9.11448	8.44849
Mcm6	NM_001313695	1	10.2028	10.3118	9.7251	8.56911	7.97495	7.90155	8.58611	8.71618	7.84699	8.68373	8.41429	7.83364	8.62378	7.87613	8.34516	8.07823	8.34395	8.13135	7.86792	9.38912	8.74716	8.28984	9.04629	8.64881	8.28403	8.54391	8.68437	8.0706	7.6397	9.07775	9.47861	9.0628	8.63385
Mcm7	NM_008568	1	10.5767	10.3371	9.99264	8.09831	7.54203	7.55671	8.14466	8.18032	7.69232	7.74843	7.59806	7.94404	8.67276	8.40155	8.25031	8.12362	8.68241	6.58616	7.80044	9.26081	8.18498	7.61758	9.16117	7.98944	7.37118	7.96115	8.31195	7.24818	7.62322	8.90532	9.56034	9.36666	7.98614
Mcmbp	NM_145955	1	10.6698	10.5866	10.4774	9.18574	8.98456	8.97576	9.19701	9.12638	9.10265	8.97907	8.70703	8.68364	9.03581	9.13392	8.87662	9.41059	9.44545	8.26703	8.94231	9.04403	8.9534	8.65257	9.22758	8.68445	8.48898	8.68233	8.69346	8.57447	8.53717	9.24788	9.19204	9.14319	8.44849
Melk	NM_010790	1	8.44243	8.58508	8.42027	6.96902	6.98959	6.40206	7.07061	7.22077	6.73035	7.13239	6.67785	6.61218	7.47935	6.6669	6.80831	6.07202	6.74517	6.0966	6.91233	7.64225	6.81675	6.9127	7.36297	6.86949	6.50438	7.16953	6.51726	6.31421	6.53941	7.10773	7.73164	7.74402	5.95359
Mis18a	NM_025642	1	10.1819	10.3054	10.2802	7.72327	7.86916	7.37425	7.63358	7.70864	7.60828	7.66235	7.21604	7.46754	7.87582	7.76642	8.03958	7.74227	7.81179	7.87235	7.51069	7.96408	7.87586	7.53564	8.33564	7.8707	7.86748	7.53375	7.96691	7.10056	7.98732	7.92338	8.78545	8.4434	7.91635
Mtus1	NM_001005863	1	9.91139	10.6204	10.5085	9.06056	8.69573	8.65031	8.83042	9.03603	8.95055	9.15486	8.60691	8.59412	8.94187	9.05446	9.28821	9.22522	9.30228	8.64462	8.91704	8.5351	8.50644	8.42114	8.40902	8.74197	8.46143	8.62855	8.66602	8.2354	8.72642	8.99411	9.04492	8.89564	8.44849
Nasp	NM_016777	1	10.0163	10.0994	9.48097	8.693	7.5189	7.86427	8.50797	8.60455	7.98668	8.72678	8.23924	7.7913	8.77885	7.84947	7.77918	7.68287	8.06418	7.928	8.51558	8.85697	8.67906	8.17274	8.15975	8.31159	7.98825	8.46938	8.08212	7.87548	8.07471	8.24616	9.19669	8.96966	6.77963
Ncapd2	NM_146171	1	9.7864	9.22246	9.35857	7.14377	6.98959	6.68469	6.79159	7.00324	6.48853	7.34073	6.74493	6.68336	7.38172	7.64767	8.00514	7.22241	7.65664	6.44069	6.88653	7.69287	7.01391	6.84627	7.95938	7.13293	7.03969	6.87838	6.77872	6.49063	6.43002	7.79745	8.60813	8.19175	7.84301
Ncapd3	NM_178113	1	9.12559	8.96324	8.84789	7.24952	7.26455	7.03716	7.39394	7.27038	6.96469	7.28422	7.02683	6.95671	7.24032	7.17611	7.68078	7.77108	7.36239	6.58616	6.91233	7.78904	7.31247	7.20549	8.0355	7.32583	6.96315	7.34655	6.84548	7.00414	7.01391	7.4241	7.78207	8.03201	7.18774
Ncaph	NM_144818	1	9.66254	9.69268	9.3543	7.16194	7.29209	6.43635	7.33481	6.8485	6.95111	7.5708	6.84004	6.63629	7.54096	6.6669	7.40947	7.30353	7.63602	6.0966	6.98706	8.38927	7.28219	7.0954	8.46515	7.23259	6.65794	7.01042	6.70873	6.82759	7.03896	7.61039	8.42984	7.86964	7.40715
Ndc80	NM_023294	1	9.22235	9.39479	8.94183	7.08784	7.1183	6.21727	6.70084	6.747	6.6145	7.10001	6.92927	6.5373	7.27699	6.32384	6.75403	6.66998	6.89154	6.95104	6.98706	7.87922	6.89887	7.23175	7.20712	6.86949	6.79671	6.78313	6.90927	6.62637	6.5741	7.45222	7.74442	7.83485	7.0641
Nek2	NM_010892	1	7.99915	8.07117	7.89448	7.39488	6.69158	6.71293	6.55304	7.11609	6.92355	6.9627	7.07976	6.97573	7.10411	6.6045	7.00705	5.97629	6.85633	5.64386	6.86026	7.08309	7.37119	6.50246	6.32805	6.91019	6.39209	6.96773	6.84548	6.44238	6.50386	7.07192	8.0829	7.86964	6.20842
Nsl1	NM_198654	1	8.8508	8.35708	8.29237	6.39328	6.84826	6.50255	6.70084	6.59951	6.32966	6.39666	6.23999	6.34582	6.73388	6.15995	6.4808	6.84278	6.82022	5.64386	6.59944	7.22739	6.48575	6.36686	7.13975	6.78445	6.20537	6.45261	6.43294	6.31421	6.43002	6.87816	7.03644	7.09137	6.92887
Nuf2	NM_023284	1	8.40168	8.69665	8.05024	6.594	6.20393	6.29405	6.5002	6.34545	6.15111	6.449	6.85529	6.31625	6.73388	5.97506	5.91519	5.97629	6.29715	5.64386	6.35797	6.53596	6.37533	6.54496	6.9561	6.38308	5.82774	6.57139	6.67241	6.11316	6.18269	6.38917	6.71167	6.56342	5.95359
Nusap1	NM_133851	1	8.88815	9.63782	9.40053	7.21513	6.92065	6.36695	6.60401	6.8485	6.74616	7.16406	6.88534	6.68336	7.41501	6.47099	6.93568	6.16179	7.28502	6.83937	6.80623	7.58981	6.72966	6.58625	6.79024	7.41339	7.66493	6.92376	6.63516	6.49063	6.9091	7.27457	7.76963	8.13568	6.92887
Oip5	NM_001042653	1	8.09171	8.1729	7.55127	7.16194	6.41912	6.21727	6.26707	6.56015	6.50722	6.54834	6.53353	6.37478	7.02007	6.07045	6.54615	5.87376	6.62474	6.71832	6.39505	6.92271	6.48575	6.58625	5.98832	7.13293	7.3107	6.62732	6.38886	6.68973	5.99059	6.38917	7.58314	7.25819	5.64386
Pkmyt1	NM_023058	1	9.82928	9.59133	9.37128	7.72327	7.37172	8.01931	7.63358	7.82942	6.97814	7.5708	7.90716	7.48092	8.34167	7.44894	7.46121	6.99708	7.77454	7.32727	7.68545	8.19228	7.58475	7.9536	8.6091	7.74131	6.88234	7.24296	7.55303	6.71026	7.06359	7.65948	8.46885	7.70603	7.50549
Plk1	NM_011121	1	10.1298	10.1104	9.86056	7.99059	7.4715	7.30172	6.99624	7.4957	7.29006	7.64	7.31869	7.13656	8.11739	7.37611	7.93368	6.78745	7.52824	6.44069	7.70033	8.32656	7.68073	7.35631	8.6215	7.64811	7.03969	7.53375	7.51252	6.9361	7.06359	8.23001	9.17326	9.04007	7.84301
Prc1	NM_145150	1	9.4542	9.78278	9.13816	7.42529	6.95553	6.84639	6.65323	6.81545	6.93739	7.5708	7.27396	6.66002	7.5708	6.83937	7.51115	6.47362	7.45948	6.27888	7.63985	7.87922	7.21965	6.58625	7.20712	7.49594	6.60854	7.31284	6.43294	6.51415	6.5741	7.53347	7.78207	8.03201	6.92887
Prkcd	NM_011103	1	12.4401	12.3406	12.5438	10.5088	10.0711	10.374	10.8479	10.7914	10.8183	10.4686	10.1241	9.96573	10.5563	11.5004	11.3689	11.6373	11.4596	10.8072	10.5318	10.0536	9.70701	9.94834	10.5665	9.82447	8.60686	10.0866	9.5038	9.58613	10.724	10.5741	10.4624	10.5709	10.6171
Psme3	NM_011192	1	9.05509	9.03447	9.23412	8.8243	8.05754	8.41273	8.96324	8.67992	7.83964	8.42082	8.44488	7.99156	8.87168	8.81372	9.04431	8.51287	9.26248	7.242	8.37421	8.26098	8.45307	8.49888	8.20988	8.32671	7.21493	8.29044	8.2761	7.75227	8.11061	8.91546	9.617	9.10721	8.11634
Psrc1	NM_019976	1	8.39131	8.05603	8.10202	6.36217	6.60635	6.09383	5.82665	6.34545	6.30852	6.10188	6.01389	6.25527	6.86009	6.39929	6.3032	6.78745	6.58225	5.88792	6.31992	6.83531	6.31678	6.50246	6.55189	6.43981	6.55741	6.18092	6.63516	6.28714	6.26993	6.44624	6.90608	6.9027	5.64386
Racgap1	NM_001253809	1	11.2812	11.0298	10.8488	7.73545	7.20781	7.26405	7.45073	7.55696	7.29006	7.72738	7.62502	6.93743	8.40931	7.37611	7.90905	7.41726	7.83006	6.44069	7.45911	8.56257	7.60935	7.30777	8.46515	7.89118	7.64057	7.77565	7.36105	6.73049	7.15809	8.14638	9.13012	8.62744	8.0527
Rad21	NM_009009	1	10.2234	10.9725	10.801	9.44885	8.89755	8.62824	9.1203	9.43455	9.38363	9.48456	9.24492	8.88327	9.45126	9.16668	9.23471	9.26627	9.45137	8.77174	9.50536	9.40438	9.3536	8.58288	8.39464	9.15152	8.54257	9.37206	9.12151	8.63475	8.45578	9.62061	10.0334	9.95376	8.98013
Rbbp4	NM_009030	1	11.4899	11.1162	11.15	9.53154	9.04248	9.51817	9.48227	9.58918	9.25412	9.40727	9.12727	9.02246	10.1546	10.5666	10.6932	10.4216	10.7089	8.99663	8.87174	9.60269	9.38955	9.38391	10.11	9.26573	8.79524	9.31361	9.35708	9.04735	9.21276	10.4505	10.8791	10.6605	10.1543
Rbl1	NM_011249	1	8.59478	8.91372	8.80479	7.46973	7.14876	7.05932	7.47832	7.36477	7.24626	7.44754	7.30764	6.93743	7.5708	6.83937	7.30008	7.18007	7.14608	6.83937	7.12585	7.00512	6.85839	6.74052	6.69957	6.32405	6.75193	7.01042	7.40597	6.97052	6.88166	7.53347	7.63892	7.56456	6.77963
Rbm38	NM_019547	1	10.745	10.7222	10.4774	7.55471	7.29209	7.283	7.7513	7.45336	7.64248	7.31275	6.90013	7.18642	7.62869	7.95326	7.81939	8.31186	8.13937	6.58616	7.14773	8.29414	7.63354	8.27729	8.45132	8.0635	7.24757	7.77565	7.75753	7.59566	8.37937	7.88261	8.5365	8.47764	7.6841
Rcc1	NM_001197082	1	9.00156	9.01112	8.65334	7.89605	7.26455	7.47662	7.72852	7.57682	7.83964	7.88772	7.74457	7.35577	8.30664	7.84947	7.90905	7.65222	8.29217	7.87235	7.57671	8.12015	7.53425	7.33224	8.15975	7.49594	7.03969	7.87138	7.72245	6.73049	7.03896	7.45222	8.94334	8.29773	6.77963
Rcc2	NM_173867	1	10.5767	10.2533	10.0984	8.43358	8.08929	8.65759	8.79795	8.81144	8.55666	8.29774	7.92896	8.18383	9.47512	9.32016	9.26414	9.22522	9.27587	8.70958	8.24819	9.08249	8.4666	8.69092	9.78019	9.10844	8.8494	8.77189	8.58042	7.87548	8.74176	9.06869	9.70784	9.35443	8.11634
Rhno1	NR_027360	1	9.1928	9.24266	9.08253	7.79488	7.44719	7.39182	7.53195	7.77889	7.61691	7.39512	7.8165	7.86459	8.35888	7.73764	7.95789	7.22241	8.23846	7.32727	7.72965	7.69287	7.48192	7.25754	7.65605	7.98944	7.66493	7.80018	7.85796	7.19093	7.3099	7.90313	8.67637	8.32305	7.18774
Rhoa	NM_001313961	1	11.1718	11.7332	11.6777	10.5159	10.3021	10.2827	10.5592	10.658	10.4458	10.2536	10.1146	10.1403	10.6588	11.1643	11.1901	10.9611	11.1205	9.78046	10.4461	10.3263	10.0413	10.0588	9.67107	9.92721	9.58333	10.1211	9.99404	9.82594	10.2344	10.5931	10.9553	10.4977	10.1237
Sept9	NM_001113486	1	10.0231	9.4992	9.59741	6.96902	6.51576	7.283	7.53195	7.00324	7.03074	7.03299	6.57099	6.68336	7.27699	7.82232	7.79271	7.79933	7.71679	7.928	6.77845	7.96408	7.42762	7.69512	7.67997	7.46895	7.73565	7.05187	7.51252	7.45685	7.38998	7.94333	8.23545	7.83485	7.84301
Siah2	NM_009174	1	8.63928	9.12429	8.99758	7.31594	6.92065	7.05932	7.42262	7.38743	6.43099	7.06689	7.16796	7.10234	7.25877	8.02648	7.99347	8.71914	7.83006	6.44069	7.33106	7.08309	6.97657	7.4262	6.652	6.82759	6.84016	6.78313	7.16589	6.73049	7.20312	7.63514	7.69264	7.6269	7.84301
Ska1	NM_025581	1	8.97403	8.87111	8.33627	6.594	6.41912	6.05024	6.70084	6.24975	6.22068	5.96475	6.19271	6.12497	6.56624	5.97506	6.34051	6.07202	6.24363	5.64386	6.28084	6.83531	6.43159	6.31868	6.83352	6.38308	6.55741	6.32315	6.03562	6.05018	6.13701	6.32975	7.35231	7.33488	5.64386
Slfn1	NM_011407	1	9.49834	9.60179	10.1632	5.79121	5.64386	5.75668	5.82665	5.64386	5.77299	5.73102	5.71249	5.86409	5.64386	6.6045	6.60866	6.78745	6.29715	6.0966	6.02112	7.22739	6.58831	6.36686	7.03239	6.6467	6.27034	6.62732	6.0917	6.53731	6.96246	6.91905	6.45618	6.86871	6.61316
Smc2	NM_008017	1	8.73258	9.21567	8.45255	7.6087	7.71485	6.79448	7.1064	6.88081	7.05635	7.72738	7.23948	6.89806	7.02007	6.07045	6.60866	6.72991	6.99234	6.27888	7.70033	8.19228	7.83472	7.53564	6.87555	7.35561	7.34126	7.87138	7.40597	6.62637	6.73606	7.14268	7.11722	7.93679	5.95359
Smc3	NM_007790	1	10.1576	10.2163	9.90788	8.86923	8.29393	8.26797	8.63595	8.60455	8.43019	8.67276	8.64253	8.36794	8.74653	8.00248	7.92142	8.21033	8.07954	7.05469	8.71931	8.66752	8.6076	8.49888	7.85822	8.1846	8.31515	8.54391	8.56069	8.19229	8.01283	8.05761	8.46113	8.36023	8.17728
Smc4	NM_133786	1	10.3085	11.1253	10.6281	9.2466	9.32183	8.20971	7.98076	8.33989	8.68527	9.29017	8.97842	8.53761	8.56568	7.55172	7.75174	7.95809	8.58894	7.6254	9.35355	9.60269	9.2712	8.99678	8.33564	9.21789	8.76174	9.19834	8.67522	8.77283	8.92091	8.86403	8.83406	9.30445	8.34604
Spag5	NM_017407	1	9.54118	9.35823	9.13816	6.77017	6.60635	6.74063	6.44535	6.81545	6.52566	6.99827	7.06671	6.77311	7.39846	6.5393	6.80831	6.32612	6.53848	6.44069	7.21147	7.58981	7.18733	6.81188	6.83352	6.94979	5.9116	7.16953	6.63516	6.41765	6.5741	6.74805	7.85455	7.6269	6.20842
Spc24	NM_026282	1	10.6481	10.7053	10.3926	8.26729	8.3863	7.6473	7.68183	8.40797	8.24224	8.54628	8.62928	7.75871	8.89546	7.55172	8.41678	7.30353	8.47745	7.75415	7.96972	8.64199	7.79238	7.7687	8.65808	8.56206	8.58149	8.10595	8.22687	7.75227	7.37037	8.35447	9.35497	9.21259	8.11634
Spc25	NM_001305800	1	8.29449	8.64701	8.66716	7.08784	7.05538	6.50255	6.5002	6.747	6.56186	7.19505	7.45515	7.01306	7.14435	6.6045	7.16099	6.40175	6.92593	7.05469	6.77845	7.08309	6.68408	6.26883	6.652	7.16692	7.37118	7.27833	7.08532	6.68973	7.01391	7.14268	7.35231	7.25819	6.20842
Spdl1	NM_027411	1	8.07884	8.08615	7.65199	6.29791	6.1447	6.09383	6.13465	6.4352	6.22068	6.77034	6.06727	6.15866	6.50573	6.24422	6.37688	6.32612	6.49334	6.0966	6.86026	5.83623	6.43159	6.36686	7.03239	6.91019	6.06596	6.38933	6.55764	6.36685	6.46741	6.44624	7.07739	6.72413	6.61316
Stk10	NM_009288	1	10.7016	10.299	10.7947	6.72199	7.37172	6.96854	7.07061	7.31834	7.03074	7.5708	7.23948	6.7947	7.33031	8.47314	8.06209	8.65875	7.9181	7.6254	7.4937	7.69287	7.79238	7.7687	7.79393	6.98832	6.44933	7.50419	7.44954	7.51632	7.50233	8.1635	7.7944	7.85235	7.6841
Suv39h1	NM_011514	1	8.69934	8.93869	8.84181	7.00973	6.95553	6.87166	6.91783	6.78164	6.88121	7.31275	6.91477	6.95671	7.24032	6.94386	7.09701	6.94746	7.48276	6.27888	7.08105	7.53538	7.21965	7.35631	7.10484	7.62384	7.90887	7.13137	7.38368	6.98743	7.28917	7.65948	7.90092	7.81713	7.18774
Tfdp1	NM_009361	1	9.34561	9.34584	9.27079	7.8294	7.34567	7.55671	7.90148	7.76165	7.88321	7.88772	7.67747	7.45403	8.50515	7.76642	7.75174	7.77108	7.57232	7.05469	7.62432	8.04422	7.79238	6.87987	7.74942	7.38479	6.84016	7.89435	7.53292	7.28968	7.40932	7.5069	8.42191	8.4549	7.59756
Timeless	NM_001164080	1	8.79683	8.58508	8.31887	6.72199	7.08718	6.6265	6.65323	6.67514	6.41129	7.03299	6.85529	6.91787	7.04154	7.17611	6.93568	6.72991	7.11662	6.0966	6.96257	7.83484	8.23327	8.00017	7.33311	7.59915	7.45741	7.56272	8.10954	7.44466	6.67344	7.98244	7.93475	8.03201	7.0641
Tpr	NM_133780	1	10.6416	10.7436	10.6801	9.55922	9.53861	9.50611	9.39089	9.18576	9.43576	9.72116	9.2362	9.4508	9.308	9.12283	9.3398	9.74423	9.63924	8.30955	9.74315	9.64186	9.5633	9.32414	9.37403	9.05498	8.65631	9.51971	9.61799	9.41232	9.52354	9.44975	9.57113	9.68743	9.11086
Tpx2	NM_028109	1	9.77847	9.61734	9.46524	7.59539	7.37172	6.96854	6.87696	7.5964	6.71436	7.36818	7.6339	6.81597	7.49501	6.99339	7.22224	6.60745	6.85633	7.55644	7.3118	7.58981	7.12045	7.06651	7.607	7.52245	6.39209	7.13137	6.77872	6.71026	7.3099	7.39541	8.0421	8.27196	7.18774
Ube2c	NM_026785	1	11.2713	11.1505	10.9722	9.40756	9.15179	8.79603	7.88096	8.88495	8.71772	9.19373	9.2008	8.62458	9.81142	8.65345	9.83746	8.38823	9.8374	8.74099	8.93603	9.77701	8.91444	8.47709	9.61014	9.29677	9.14621	9.07307	9.2747	8.2068	8.49252	9.89108	11.2182	10.7355	8.98013
Uhrf1	NM_010931	1	8.5766	8.64701	8.11216	6.77017	6.46826	6.74063	6.79159	6.71152	6.17467	6.92622	6.67785	6.34582	6.97615	6.72671	7.07504	6.72991	7.14608	6.71832	6.63086	7.00512	6.48575	6.50246	7.03239	6.73998	6.44933	6.57139	6.87773	6.01763	5.99059	7.24271	8.03171	7.54317	7.0641
Usp8	NM_001252580	1	8.92456	9.37663	9.46919	7.90687	8.05754	8.24881	7.77374	8.0009	8.08945	8.11537	7.43497	7.50731	8.2616	8.71381	8.48502	8.74841	8.56732	7.05469	7.82781	7.92227	8.23327	7.75065	7.99795	7.69546	7.11236	7.98275	7.61174	7.73235	8.4276	8.63777	8.48416	8.4434	8.5897
Vrk1	NM_011705	1	10.3915	10.1067	9.99812	7.23242	7.05538	6.82066	6.91783	7.45336	6.99148	7.10001	7.02683	6.63629	7.62869	8.24675	8.289	8.46076	7.69702	7.32727	7.4415	7.87922	7.55972	7.33224	8.45132	7.69546	6.88234	7.13137	7.21721	7.20546	7.40932	8.14638	8.42984	8.00096	7.30162
Zwilch	NM_026507	1	8.06586	8.10097	7.92931	7.00973	6.77204	6.56586	6.38833	6.747	6.43099	7.03299	6.30812	6.22379	6.95367	6.39929	6.7261	5.97629	6.92593	5.64386	7.01114	7.41995	6.93825	6.36686	6.20159	7.13293	6.13734	6.62732	7.05743	6.5601	6.46741	7.03519	7.59729	7.49942	6.77963
1110008F13Rik	NM_026124	1	11.1004	11.8375	11.7606	10.6857	10.0185	10.2991	10.3172	10.2731	10.3325	10.5337	10.3908	9.88751	10.4009	10.603	10.7147	10.027	10.699	9.97796	10.4193	9.88976	9.80078	9.66974	8.6215	9.70808	9.08432	9.90055	9.75886	9.74373	9.6949	10.0697	10.7771	10.175	9.41912
1700020L24Rik	NM_025492	1	9.06164	8.93869	8.93042	5.69466	5.95089	5.80993	5.91001	5.78709	5.64386	5.81322	5.67858	5.64386	5.8032	5.64386	5.86485	5.87376	5.72421	5.64386	5.76208	5.64386	5.73612	5.72003	5.98832	6.06031	6.44933	5.84592	5.7866	5.72675	5.64386	5.73828	5.8936	5.99842	5.64386
4930523C07Rik	NM_001162896	1	8.82021	9.08754	8.96439	6.53944	6.88492	7.12385	6.95757	7.1953	7.0436	6.64129	7.45515	7.28125	7.41501	7.9023	7.60614	7.5889	7.50568	6.44069	6.8335	7.00512	7.58475	7.20549	7.5036	6.6467	7.4005	7.27833	7.85796	7.53944	7.18078	8.11153	7.67939	7.40771	8.17728
4930579G24Rik	NM_029482	1	7.8252	8.00964	7.92931	6.12344	5.95089	5.80993	6.13465	6.39103	5.86277	6.22711	5.8097	5.90436	6.40992	5.97506	6.4808	5.76339	6.00717	5.64386	6.02112	6.15779	5.98201	5.64386	6.26621	5.73731	5.9116	6.45261	5.7866	5.72675	5.76893	6.20304	6.45618	6.1757	6.20842
5730508B09Rik	NM_027482	1	9.08756	9.4363	9.42514	8.00072	7.54203	7.57222	7.7513	8.10027	8.18537	7.6173	7.77699	7.54602	8.14741	7.61639	8.05088	7.65222	7.93508	7.81446	7.89405	7.47883	7.37119	7.49285	7.44898	7.49594	7.14737	7.53375	7.79179	7.33001	7.38998	7.73011	7.93475	7.88672	7.30162
6430548M08Rik	NM_172286	1	9.73813	9.42456	9.8271	8.41854	7.79407	8.47177	8.12734	8.25617	7.73257	8.13148	8.35648	7.72537	8.29774	7.79464	8.08426	8.21033	8.26556	8.39102	7.74409	7.69287	7.8137	8.23896	7.95938	7.35561	7.68889	7.72529	8.3237	7.78165	7.44725	7.73011	7.95687	7.83485	6.92887
9130401M01Rik	NM_029418	1	9.29645	9.35205	8.88384	7.87417	6.98959	7.57222	7.92172	7.89416	7.59087	7.39512	7.46513	7.31152	7.67064	8.4905	8.37243	8.2518	8.3816	7.15138	7.57671	7.87922	7.50833	7.90548	7.91976	7.49594	7.24757	7.93923	7.72245	7.45685	7.57265	8.24616	8.42984	7.96923	8.29195
A430046D13Rik	NR_131151	1	8.16657	7.75229	7.89448	5.92491	5.88005	6.13617	6.20238	6.09312	6.41129	5.89098	6.06727	6.15866	6.11815	6.32384	6.3032	6.47362	6.49334	6.27888	5.97292	6.00596	5.73612	6.41349	6.06296	5.90783	5.9116	6.10417	6.24791	6.39247	5.64386	6.50114	6.48691	5.99842	6.42494
A530064D06Rik	NM_001113556	1	6.47164	7.92886	7.95206	5.69466	5.72697	5.64386	5.73815	5.64386	5.64386	5.73102	5.64386	5.86409	5.69894	5.87288	5.64386	6.24629	6.24363	5.64386	5.76208	5.64386	5.73612	5.79239	5.64386	5.64386	5.64386	6.02312	5.64386	5.95021	6.26993	5.9893	5.93878	5.64386	6.42494
AB124611	NM_001198794	1	11.4839	11.5084	11.9435	6.16005	6.56177	6.74063	6.44535	6.1994	6.59717	6.54834	6.06727	6.5627	6.44256	8.9949	8.75752	9.78011	9.10632	6.27888	6.39505	7.08309	7.25126	6.9448	7.44898	6.94979	6.27034	6.73304	6.70873	7.40745	7.52023	7.4241	7.07739	7.96923	6.92887
Abca7	NM_013850	1	11.5092	10.806	11.0884	8.32487	8.19523	8.69347	8.53449	8.48355	8.63094	8.59357	8.20986	8.05556	8.8167	8.77174	8.89554	8.9382	8.90558	9.58657	8.30773	8.8346	8.64377	9.09302	9.30651	8.38564	8.0997	8.9469	8.88811	8.47006	8.85895	8.81071	8.86363	9.04769	9.2871
Abcc4	NM_001163676	1	8.34908	8.5745	8.66716	7.10673	6.64959	7.05932	6.70084	7.06077	6.93739	6.49953	6.90013	6.91787	6.97615	7.08764	7.20211	6.84278	7.11662	6.71832	6.56732	7.00512	7.55972	7.28287	6.74561	6.98832	7.61578	7.27833	7.2422	6.97052	6.9091	7.39541	7.53983	7.49942	6.77963
Abcd1	NM_007435	1	8.4222	7.80757	8.3276	6.81678	6.36826	6.33095	6.79159	6.63781	6.43099	6.49953	6.21655	6.58765	6.70726	6.78414	6.63893	7.18007	6.58225	6.27888	6.28084	6.42058	6.77386	6.45866	6.83352	6.91019	7.53877	6.51322	6.38886	6.66893	7.18078	7.03519	6.95086	7.28421	5.64386
Abcd2	NM_011994	1	9.55518	9.90186	10.0008	5.74376	5.95089	5.80993	6.20238	5.85372	5.74176	5.73102	5.90077	6.22379	5.99148	7.08764	6.95987	7.26354	6.95952	6.71832	5.97292	6.92271	5.82281	6.70347	6.26621	6.26251	5.64386	6.38933	6.29644	6.17353	7.37037	6.99751	6.3927	6.9027	6.77963
Acap3	NM_207223	1	9.87092	9.12429	9.65054	7.37944	6.88492	7.96163	7.88096	7.5964	7.18955	6.85039	7.36207	6.95671	7.62869	7.55172	7.76553	7.71287	7.93508	8.61101	6.93766	7.29448	7.65733	7.83871	7.63174	7.38479	6.79671	7.37948	7.36105	7.49282	7.01391	7.4241	7.43343	7.40771	7.91635
Acsl1	NM_007981	1	8.43235	8.66707	8.67402	7.26641	7.1183	6.6265	7.17543	7.06077	7.0436	6.77034	7.10552	7.01306	7.31276	7.25947	7.20211	6.94746	7.41175	7.40777	6.69172	6.53596	6.93825	6.66545	7.10484	7.32583	6.75193	6.83155	7.40597	7.11602	7.55539	7.07192	7.09744	7.33488	6.42494
Actr3	NM_023735	1	11.8607	12.4159	12.4156	10.5781	10.2747	10.097	10.996	10.8599	10.846	10.636	10.3973	9.9198	10.8625	10.6149	10.7515	11.1402	10.9134	10.3982	10.6986	10.7533	10.2036	10.4652	10.6834	10.0507	10.0675	10.2334	9.80571	9.85618	11.0401	10.6182	10.7521	10.6997	10.2425
Add3	NM_001277100	1	11.6998	11.6749	11.9534	9.58302	9.31513	9.6445	9.59994	9.49319	9.53469	8.97907	8.94315	9.30043	9.5594	9.34899	9.31658	8.95085	9.59184	8.17801	9.1679	8.94311	9.10814	9.02708	9.47999	9.54961	9.38493	9.28781	9.63224	8.98557	8.62252	9.50451	9.85053	9.95376	8.5897
Adora2b	NM_007413	1	8.92456	9.21567	9.15297	5.79121	5.72697	5.86131	5.73815	5.64386	5.80354	5.81322	5.95843	5.82265	5.90041	6.32384	6.05643	6.84278	6.24363	6.27888	6.19936	5.64386	5.73612	5.92704	5.64386	5.64386	5.64386	5.93723	5.64386	5.64386	5.64386	5.64386	5.79883	5.79629	5.64386
Adprh	NM_007414	1	9.95076	9.87623	9.8962	7.85196	7.77467	8.06384	8.22827	8.25617	8.28076	8.06593	7.54258	7.45403	8.3503	9.20923	9.16882	8.80523	8.8795	7.32727	8.07627	8.44938	8.01126	8.19959	8.17665	7.67198	7.27948	8.23753	8.10954	7.76213	8.27779	8.84294	8.92663	8.48887	8.54415
Adss	NM_007422	1	9.10035	9.90186	9.76741	8.92881	8.69573	8.70054	8.88296	8.77752	9.13904	8.97014	8.59332	8.52475	8.86567	8.52459	8.69407	8.56315	8.77963	6.95104	8.85187	8.71727	8.32525	7.98482	7.77185	8.23354	8.0997	8.23753	8.59989	8.22117	8.12238	8.48275	8.94334	8.91242	7.76574
Adssl1	NM_007421	1	10.5231	10.365	10.8119	5.88171	6.31553	6.13617	6.32896	5.97838	6.43099	5.89098	5.74564	6.01888	5.85262	7.13256	7.35581	7.65222	7.28502	5.88792	6.02112	6.83531	6.31678	6.36686	6.4991	6.32405	6.84016	6.32315	6.19769	6.91857	6.5741	7.21014	6.97274	7.00011	6.77963
Ahnak	NM_009643	1	12.1653	11.9986	11.9958	10.9226	11.2767	11.2108	11.2208	10.7893	11.2726	10.4844	10.8866	11.1037	11.006	10.603	10.4438	11.0549	10.7333	11.4635	10.8431	9.77701	9.73523	9.86692	9.33691	9.44266	9.10228	10.0866	10.4235	9.80701	8.81611	9.35607	9.12524	9.40866	9.44414
AI839979	NR_102275	1	10.8087	10.9481	11.1671	5.69466	5.72697	5.64386	5.82665	5.78709	5.64386	5.64386	5.71249	5.69067	5.64386	6.47099	6.18507	6.24629	6.13023	5.64386	5.64386	6.00596	5.98201	5.79239	5.64386	5.73731	5.64386	5.64386	5.64386	5.68591	5.99059	5.9893	5.79883	6.05998	5.64386
Akap13	NM_029332	1	11.0453	10.9086	11.1708	9.05571	8.7857	8.82219	9.25397	9.09917	9.16575	8.95211	8.50416	8.57553	8.79158	9.34899	9.33519	10.0507	9.26919	9.55156	9.35825	8.64199	9.11675	8.90186	9.60391	8.45607	8.39014	8.91356	8.82334	8.89437	9.21825	9.19059	8.90404	9.05526	9.31449
Akirin2	NM_001007589	1	9.18081	9.71212	9.62599	8.60939	7.71485	7.98498	8.57338	8.75155	8.24224	8.40765	7.91446	8.0909	8.55826	9.07761	9.0723	9.4014	9.23531	7.69121	8.34609	8.58953	8.23327	8.15912	7.20712	8.28088	7.18155	8.66907	8.56069	8.11745	8.25659	9.00364	9.26032	9.19212	8.29195
Alox5ap	NM_009663	1	12.8956	13.1785	13.3503	7.12537	7.31913	7.52521	7.03391	6.78164	6.63163	6.28586	6.43541	6.83693	6.47448	9.89008	9.64583	10.6482	9.97513	8.67747	7.35006	8.04422	7.8137	6.9448	6.83352	6.69409	7.14737	7.09218	7.42792	7.13132	7.71935	8.03918	8.42191	8.61724	8.0527
Alyref	NM_011568	1	10.0595	9.91869	9.80852	7.90687	7.97495	8.3331	8.17868	8.5352	7.5464	7.52275	8.3074	7.90486	8.81046	7.44894	7.55943	7.26354	7.61509	8.46814	7.52748	8.32656	7.53425	7.55657	8.45132	7.91137	8.6318	7.41169	8.03999	7.55085	8.05028	7.36613	8.38976	8.23241	7.30162
Ampd3	NM_001276301	1	9.4442	9.16718	9.6781	8.19853	7.58722	7.90155	7.7513	7.81277	7.79472	7.44754	7.19219	7.76966	8.07637	7.76642	7.77918	7.77108	7.81179	7.55644	7.93238	7.29448	6.77386	6.77664	6.91639	6.91019	6.55741	7.05187	6.87773	6.86467	6.43002	7.07192	7.31854	7.28421	6.42494
Ankle1	NM_172756	1	8.82792	8.74465	8.25626	6.88401	7.08718	6.79448	6.60401	6.56015	6.02713	7.22539	7.04025	6.58765	7.10411	6.24422	6.69762	6.54209	6.92593	7.242	6.75011	7.22739	6.53795	6.41349	6.69957	7.06243	6.20537	6.78313	6.67241	6.17353	6.22697	6.91905	7.53983	7.64709	6.61316
Anp32b	NM_130889	1	11.6988	11.7104	11.4913	9.76937	9.35486	9.2556	9.64323	9.82744	9.48607	9.40064	9.18578	9.11548	9.91394	9.30062	9.52947	9.12834	9.89928	9.42188	9.74674	10.3263	9.60672	9.42431	9.03706	9.78123	8.71584	9.81885	9.65102	8.73328	8.88682	9.37823	10.3951	9.98978	9.36776
Anp32e	NM_023210	1	11.2741	11.083	10.8457	8.71778	8.34744	8.05284	8.57338	8.75155	8.71772	8.74783	8.63371	8.20817	8.93615	9.08905	8.83146	8.97581	9.02935	8.35086	8.78362	9.50694	8.8744	8.45497	8.50585	8.81882	8.85999	8.89089	8.90385	8.3045	8.53717	9.1396	9.74008	9.32966	8.75874
Anxa2	NM_007585	1	13.337	13.4741	13.498	12.3236	12.2888	12.6083	12.5179	12.4372	12.4214	11.8616	12.0889	12.1019	12.8629	12.2841	12.5162	11.5936	12.3111	12.7672	12.499	11.0823	10.7404	10.817	11.1082	11.0233	11.1241	11.4653	11.5686	10.8552	9.95064	10.9812	12.2757	11.4697	10.1843
Ap1s2	NM_001290379	1	9.60986	10.4456	10.3136	6.08585	5.88005	6.17728	6.26707	5.78709	6.02713	6.16585	6.45557	6.15866	5.752	8.05008	7.3918	8.21033	7.67697	5.88792	6.28084	7.00512	7.37119	7.00694	6.4991	7.35561	6.39209	6.92376	7.05743	6.41765	7.40932	7.30574	6.95086	7.25819	6.77963
Apaf1	NM_001042558	1	9.67114	9.42456	9.63305	7.37944	7.05538	6.94493	7.90148	7.76165	7.99994	6.92622	7.23948	7.04943	7.76402	7.82232	7.89658	8.29211	8.06418	8.17801	7.51069	8.08269	8.0296	7.96929	8.38011	8.0635	8.34562	7.96115	7.95184	7.61755	7.89428	8.14638	8.3816	8.12132	7.50549
Apba1	NM_177034	1	9.7544	9.40677	9.56825	6.19576	5.88005	5.86131	6.32896	6.14725	5.86277	6.22711	6.28575	6.45833	6.44256	7.21839	7.30008	7.71287	7.11662	5.64386	5.97292	7.00512	6.72966	7.12372	6.38735	6.49437	6.50438	6.78313	6.74415	6.86467	6.96246	7.39541	7.36891	7.06159	7.18774
Appbp2	NM_025825	1	7.66228	8.46416	8.68085	7.58196	7.05538	7.10266	7.36468	7.74419	7.39411	6.9627	7.21604	7.03136	7.89953	7.64767	7.07504	7.48839	7.55045	6.44069	7.51069	7.22739	7.31247	6.9127	7.10484	7.02586	6.44933	7.20672	6.99998	6.6478	7.01391	7.4241	7.35231	7.66701	7.30162
Arf5	NM_007480	1	10.1637	9.82358	10.1312	8.67413	8.13565	9.53408	8.92365	9.65137	8.69753	8.61664	9.05311	8.43823	9.85452	9.44114	9.71849	9.12834	9.27587	11.0833	8.28816	8.44938	8.11798	8.64281	9.88163	8.94173	9.38493	8.32467	8.59019	7.96358	8.90737	8.91546	9.67819	8.93723	8.17728
Arhgap11a	NM_181416	1	9.64083	9.56484	9.54224	7.39488	7.02286	7.10266	7.20875	7.22077	7.17794	7.2551	7.16796	6.93743	7.49501	7.2994	7.69526	7.65222	7.77454	7.15138	7.3118	7.58981	7.12045	7.17874	6.9561	7.82885	6.44933	7.44318	6.94014	6.75043	7.44725	7.5069	7.94585	7.74402	6.92887
Arhgap26	NM_175164	1	8.56742	8.9551	9.11314	7.04931	6.2608	6.87166	7.03391	7.11609	6.64857	6.54834	6.3518	6.77311	7.06269	6.89256	6.57775	6.94746	6.95952	5.88792	6.8335	6.92271	6.19204	6.36686	5.98832	6.1982	6.13734	6.32315	6.19769	6.08202	6.18269	6.2678	6.51699	6.6053	5.95359
Arhgef10l	NM_001112723	1	10.3993	9.89762	10.0597	8.20731	7.54203	8.17967	7.81759	8.01552	7.83964	7.59424	7.58896	7.67968	8.25242	9.00701	8.90803	9.16136	8.59963	7.98159	7.67041	7.35858	7.25126	7.93774	8.71705	7.59915	6.79671	7.93923	7.72245	7.27598	7.62322	7.5069	8.10287	7.85235	7.40715
Arhgef18	NM_133962	1	10.0197	9.46523	9.98989	7.63496	7.42247	7.75986	8.01883	7.74419	7.80985	7.36818	7.26256	7.23462	7.81478	7.61639	7.33747	6.89607	7.65664	8.30955	7.70033	6.83531	7.37119	7.28287	6.55189	6.6467	7.27948	7.59112	7.2422	7.28968	7.0878	7.24271	7.71876	7.28421	6.20842
Arhgef39	NM_001013377	1	9.11932	8.64701	8.88384	7.52694	7.14876	7.66186	7.24132	7.55696	7.16622	7.54697	6.6254	6.85761	7.72473	7.2994	7.65138	6.72991	7.63602	7.40777	7.4415	7.41995	6.85839	7.12372	7.33311	7.41339	6.55741	7.09218	7.26677	6.60462	6.96246	7.55957	8.46113	7.7992	7.30162
Arl6ip5	NM_022992	1	9.84076	9.86759	10.106	8.07931	7.94054	8.49635	8.07411	8.26843	8.38039	7.88772	8.22755	8.12539	8.1961	9.40498	9.31189	9.00035	9.09881	8.30955	8.09891	7.74176	8.39765	8.77368	8.28976	8.16791	8.11746	8.29044	7.93661	8.0466	8.14563	8.95532	8.93222	8.78153	7.59756
Armc1	NM_028840	1	8.87333	9.41865	9.47312	8.75417	8.41164	8.25842	8.63595	8.65211	8.60082	8.65057	8.41429	8.06447	8.88362	8.36438	8.44275	8.14579	8.64161	7.05469	8.64432	8.71727	8.26458	8.14537	7.95938	8.04534	7.37118	8.4846	8.47894	8.12511	8.47427	8.61306	8.93779	8.71613	8.39818
Arpc1b	NM_023142	1	14.5805	14.2992	14.5727	12.5222	12.4716	12.7858	12.608	12.7687	12.3861	12.5449	12.391	12.1361	12.7237	13.0773	12.8895	13.3266	12.9837	12.8506	12.8286	13.0005	12.5395	12.9087	13.1068	12.4395	11.599	12.4689	12.2513	12.0764	13.1497	12.7883	12.8024	12.7561	12.5189
Arpc2	NM_029711	1	13.7673	13.9163	13.9358	12.1451	12.0312	12.0749	12.1994	12.2946	12.2791	11.8867	11.7215	11.652	12.2807	12.1995	12.1868	12.4798	12.2196	11.4635	12.3263	12.1473	11.7596	11.6055	11.7516	11.3701	10.552	11.8054	11.6848	11.3488	11.7779	11.9911	12.13	12.0678	11.6649
Arpc5	NM_026369	1	11.8274	12.4048	12.459	10.6603	10.4316	10.3607	10.6829	10.8209	10.8679	10.6075	10.4167	10.3204	11.049	11.261	11.3756	11.0752	11.2087	10.3378	10.8364	10.7048	10.1161	10.0986	10.4873	9.77021	9.34779	10.7217	10.0268	9.87447	10.6507	10.7229	10.9359	10.6924	10.3121
Arsb	NM_009712	1	8.97403	9.42456	9.22947	7.66074	7.60929	7.18561	7.53195	7.55696	7.27924	7.44754	7.76087	7.10234	7.93438	7.82232	7.47805	7.22241	7.81179	7.32727	7.56049	8.12015	7.18733	7.88908	6.9561	7.32583	6.65794	7.61897	7.02899	7.17626	8.63078	7.61039	7.43343	7.43119	7.76574
Asap1	NM_001276462	1	9.95076	10.3022	10.318	7.41017	7.42247	7.61773	7.53195	7.38743	7.89744	7.47305	7.18013	7.49418	7.22164	7.92801	7.69526	8.36951	7.90092	7.05469	7.68545	7.47883	7.58475	7.65687	7.10484	7.16692	6.50438	7.31284	7.63079	7.72228	6.98841	7.65948	7.44912	7.66701	7.40715
Asf1b	NM_024184	1	9.80605	10.1572	9.79599	6.92714	6.51576	6.25616	6.32896	6.63781	6.45042	7.22539	7.23948	6.431	7.46353	6.6045	6.95987	7.04505	7.41175	5.64386	6.77845	7.29448	6.97657	7.00694	6.20159	6.6467	6.79671	7.09218	6.99998	6.5601	6.22697	7.10773	7.80663	7.54317	7.30162
Asrgl1	NM_025610	1	8.48205	8.35708	8.21922	6.36217	6.46826	7.14473	6.38833	6.47807	6.90957	6.54834	6.57099	6.45833	7.24032	6.6669	6.75403	7.04505	6.99234	6.27888	6.15682	7.64225	7.21965	7.55657	7.81568	7.06243	6.60854	7.13137	7.49183	7.14645	7.18078	7.33625	6.99429	7.17719	7.0641
Ass1	NM_007494	1	10.0823	10.092	9.41289	8.10771	8.33424	8.13862	7.70536	7.92547	7.44345	7.44754	7.49466	7.4404	7.96841	8.71381	9.01576	8.12362	8.74152	7.15138	7.65521	8.08269	6.89887	7.73238	8.28976	6.91019	6.7057	7.16953	6.67241	6.86467	7.92148	7.63514	7.90092	7.68665	7.40715
Atad2	NM_027435	1	9.11302	9.25597	8.92468	7.24952	7.58722	7.10266	6.79159	6.81545	6.63163	7.78962	7.09269	6.99451	7.22164	6.78414	7.22224	7.26354	7.55045	7.32727	7.01114	8.15667	7.68073	7.20549	7.97879	7.57403	7.11236	7.44318	7.33805	7.08494	7.79483	7.65948	8.03171	8.24571	7.59756
Atf6b	NM_017406	1	9.65823	9.86325	10.0171	8.12634	7.63103	8.78277	8.45342	8.2438	7.7871	8.03201	7.8165	7.65628	8.48961	8.72852	8.61252	8.79124	8.68241	8.17801	7.59276	8.56257	7.87586	8.43251	8.77371	7.97032	7.14737	8.06604	8.36979	8.00569	8.16852	8.61306	8.8926	8.61724	8.49711
Atg3	NM_026402	1	9.75035	10.5627	10.5275	8.96548	8.53207	8.31479	9.0668	8.73397	9.03022	9.02291	8.56111	8.44507	8.77244	9.00701	8.9925	8.89958	8.89694	7.87235	9.1679	9.46388	9.29414	8.70036	7.89954	8.44226	7.82486	8.95784	8.76418	8.51157	9.03738	9.1222	9.00832	8.79064	8.11634
Atg7	NM_028835	1	10.0983	9.89762	10.0225	8.51359	8.52047	8.45515	8.61124	8.66144	8.72173	8.22453	7.86254	8.53761	8.31548	9.35848	9.13205	8.98814	9.18651	7.32727	8.28816	8.19228	7.79238	7.9217	8.32051	8.58738	7.03969	8.16382	7.72245	8.28411	7.80946	8.49632	8.68302	8.51107	8.29195
Atp10a	NM_009728	1	8.5301	8.10097	8.09181	6.36217	5.95089	6.13617	5.91001	6.0369	6.02713	6.03494	6.23999	6.25527	6.27139	6.78414	6.3032	6.40175	6.49334	5.64386	6.06779	6.29515	6.25575	6.41349	5.82635	5.90783	5.64386	6.45261	6.38886	6.34078	6.22697	6.20304	5.98256	6.33355	6.77963
Atp1b3	NM_007502	1	10.5722	11.2651	11.3442	9.03614	8.3605	8.64299	9.16342	9.08538	8.73368	9.02291	8.68158	8.91319	9.36447	9.86368	9.9199	10.1745	9.99955	8.61101	9.08525	9.46388	9.40369	9.49105	9.56591	8.99946	9.03843	9.56337	9.11475	8.97289	9.93404	9.71651	9.69474	9.60725	9.39367
Atp8b4	NM_001080944	1	9.34023	9.76893	9.91369	5.88171	6.1447	5.95887	5.91001	5.91738	5.70987	5.64386	5.64386	5.64386	5.64386	6.32384	6.34051	6.99708	6.34875	6.0966	6.02112	6.15779	6.25575	6.36686	6.06296	5.73731	5.64386	5.93723	5.64386	5.95021	6.46741	6.06413	6.32627	6.52028	6.20842
Atxn10	NM_016843	1	9.5223	10.1067	9.7642	8.31679	8.0735	7.493	8.32259	8.62376	8.29695	8.43386	8.10524	8.17562	8.56568	8.84103	8.62013	8.67409	8.62078	7.32727	8.06481	8.96386	8.39765	8.45497	7.67997	8.02694	7.48504	8.61478	7.13953	7.88454	8.71091	8.44125	8.36515	8.17794	7.91635
B430306N03Rik	NM_177083	1	8.61275	9.12429	8.94751	5.96687	6.1447	5.70135	5.91001	5.91738	5.74176	6.22711	5.92989	6.01888	5.752	7.25947	6.3032	6.84278	6.39857	6.44069	5.97292	7.35858	6.68408	6.9762	7.33311	6.78445	5.64386	6.57139	6.63516	7.00414	7.4842	6.38917	6.06633	6.47581	6.42494
B4galt5	NM_019835	1	9.90047	9.69756	9.96773	8.12634	8.04139	7.94982	8.05592	8.48355	8.12617	8.31194	7.20417	7.86459	8.1961	9.30062	9.04995	9.63092	8.95637	7.75415	8.15402	7.35858	7.48192	7.40328	8.30522	7.16692	6.55741	7.53375	7.57287	7.35628	7.5897	7.63514	8.41394	7.72515	7.18774
Bard1	NM_007525	1	8.2026	8.38157	8.31009	6.16005	5.72697	5.75668	5.98884	6.39103	6.07801	6.10188	5.8097	5.78	6.34232	5.87288	6.4808	6.07202	6.29715	6.58616	6.02112	6.15779	5.9046	5.64386	6.32805	6.26251	6.33251	6.10417	5.71699	5.72675	5.88401	6.13525	6.54646	6.93591	6.42494
Bbc3	NM_133234	1	8.34908	7.97787	8.14215	6.48274	6.98959	6.50255	6.79159	7.16938	7.0436	6.6856	6.82462	6.431	7.12437	7.44894	7.22224	7.22241	7.28502	7.05469	6.59944	6.42058	6.53795	6.58625	7.10484	6.6467	5.9116	6.32315	7.21721	6.53731	6.08984	6.13525	6.81215	6.42993	6.61316
BC017643	NM_144832	1	10.0758	10.077	10.2825	7.72327	7.31913	8.10704	8.12734	7.86215	7.80231	7.78962	7.37271	7.20266	7.76402	8.92002	8.7506	8.97581	8.58894	7.40777	8.00612	8.64199	8.16852	8.23896	7.91976	7.8707	7.11236	8.1255	7.77476	7.74234	8.30903	8.76658	8.43773	8.56513	8.75874
BC030867	NM_153544	1	7.88554	7.67514	7.5953	6.3304	5.88005	6.00527	5.73815	6.0369	5.91967	5.64386	5.98643	5.94357	6.15801	5.97506	6.01087	5.97629	6.29715	5.64386	6.06779	6.29515	5.82281	5.98993	6.13393	6.26251	6.13734	6.25378	6.59692	5.87951	5.99059	5.9893	7.05706	6.64602	6.20842
BC035044	NM_001254946	1	9.62763	10.092	9.92236	6.12344	6.31553	6.05024	6.13465	5.85372	5.77299	6.34232	5.8097	5.78	5.8032	7.51828	6.57775	7.48839	6.44674	5.88792	6.15682	7.58981	7.0858	7.4262	6.55189	6.43981	5.82774	7.31284	6.0917	6.58253	8.01283	7.30574	7.05706	7.60642	6.42494
Bcl10	NM_009740	1	10.6062	10.3118	10.5686	9.34928	8.61076	8.90408	9.16342	9.4291	9.09031	9.01424	8.66435	8.76246	9.45926	9.27079	9.52947	9.67731	9.6547	8.35086	9.17857	8.76535	9.02829	8.7557	9.55302	8.51004	8.25222	8.89089	8.78983	8.55191	8.96079	8.88482	9.4438	9.35443	8.98013
Bmx	NM_009759	1	8.32749	8.38157	8.31009	5.79121	5.72697	5.86131	5.91001	5.78709	5.74176	5.73102	6.19271	5.94357	5.69894	5.76291	5.81268	5.76339	5.80033	5.64386	5.81775	5.64386	6.19204	5.86129	5.82635	5.73731	6.06596	5.93723	5.7866	5.95021	5.88401	5.9893	6.18351	5.79629	5.64386
Borcs6	NM_028005	1	9.73403	9.32073	9.55344	7.79488	7.49539	7.33844	8.1954	7.81277	8.26438	7.59424	7.37271	7.42663	8.11739	8.90715	8.77125	8.7771	8.50044	8.4301	7.94493	7.92227	8.15187	7.8557	8.50585	7.69546	7.45741	7.75069	8.25169	7.43236	7.89428	8.35447	8.38976	8.07736	8.39818
Bri3bp	NM_029752	1	10.6547	10.8916	10.9736	8.46319	7.97495	8.26797	8.57338	8.57524	8.20839	8.66171	8.32942	7.84403	8.45803	8.52459	8.58946	8.61175	8.789	7.40777	7.93238	8.38927	8.45307	8.28984	8.40902	8.80809	7.82486	8.40685	8.75553	7.88454	8.12238	8.60055	9.38791	9.11448	8.34604
Bscl2	NM_008144	1	11.2033	10.8083	11.1635	9.5489	9.06661	9.97986	9.67338	9.78539	9.52326	9.13901	9.16144	9.50748	9.91102	9.99717	10.2143	9.94088	10.1306	9.04777	9.14087	8.98433	9.0732	9.01957	9.72379	9.28907	9.21383	8.79649	9.14157	9.2606	9.72223	9.91148	9.56034	9.55477	9.25918
Bst1	NM_009763	1	8.16657	8.47558	9.35857	5.79121	6.08296	5.95887	6.06359	6.0369	5.83345	6.10188	5.84069	6.12497	5.99148	6.89256	6.86062	7.48839	6.92593	5.64386	6.02112	6.64279	6.12536	6.45866	6.20159	6.82759	6.27034	6.51322	6.24791	6.23145	6.93603	6.06413	6.51699	6.33355	6.20842
Btla	NM_001037719	1	7.99915	8.62666	8.11216	5.69466	5.64386	5.64386	5.82665	5.64386	5.64386	5.64386	5.64386	5.64386	5.64386	5.76291	5.70235	5.76339	5.94146	5.64386	5.81775	5.64386	5.73612	6.10804	6.06296	5.8251	6.20537	6.18092	5.91648	6.28714	6.13701	7.33625	6.35987	6.86871	7.0641
C1galt1c1	NM_021550	1	8.90283	9.54329	9.17731	8.12634	7.85075	7.90155	7.30431	7.72652	8.20839	8.61664	8.07948	7.78052	8.02341	7.41298	7.95789	7.88089	8.00108	7.69121	8.26831	8.35826	7.91586	7.40328	6.91639	7.06243	7.27948	8.14478	7.59243	7.27598	7.65598	7.73011	8.05241	8.27196	7.6841
C1rl	NM_181344	1	9.27969	9.01112	9.47705	6.67214	7.02286	6.8965	6.5002	6.4352	7.30082	6.92622	6.47546	6.431	6.68014	8.05008	7.52742	8.1011	7.31128	6.0966	6.59944	7.15704	6.97657	6.9127	7.33311	6.13091	6.33251	6.73304	6.84548	7.10056	6.79608	7.33625	7.05706	7.28421	6.42494
C2cd5	NM_029081	1	9.40351	9.20198	9.25715	7.36382	6.95553	7.05932	7.63358	7.24579	7.67589	7.16406	7.11822	7.13656	7.43136	7.33826	7.33747	7.52268	7.17497	7.6254	7.14773	7.29448	7.45502	7.33224	7.77185	7.49594	6.60854	7.59112	7.40597	7.17626	7.11162	7.55957	7.75708	7.40771	7.40715
C3	NM_009778	1	12.6312	12.0878	12.3324	8.54162	8.53207	9.03288	8.80885	8.32822	8.41543	8.8291	7.09269	8.72921	9.14399	10.0912	9.6004	9.96602	8.98111	8.35086	7.91972	7.74176	7.8137	8.19959	8.59659	8.53628	6.92332	9.3473	7.8417	8.38328	8.88682	8.0016	7.94585	8.84409	8.44849
Camkk2	NM_145358	1	11.8914	11.7485	11.873	6.48274	6.20393	6.87166	6.5002	6.34545	6.3913	6.59556	6.74493	6.81597	6.97615	8.36438	7.55943	8.38823	8.07954	7.75415	6.59944	7.47883	7.48192	7.90548	7.77185	7.41339	7.61578	7.69943	8.38108	8.0466	7.15809	8.69775	8.18011	7.9036	7.76574
Camp	NM_009921	1	8.95304	9.16012	9.22013	5.64386	6.51576	5.80993	5.64386	5.64386	5.64386	5.64386	5.64386	5.78	5.64386	5.87288	5.64386	5.76339	5.72421	5.64386	5.64386	5.64386	5.64386	5.64386	6.20159	5.64386	5.64386	5.84592	5.64386	5.72675	5.64386	5.73828	5.64386	5.64386	5.95359
Capg	NM_007599	1	12.7419	12.7528	12.7066	9.56947	10.171	10.048	9.57461	10.3443	9.98974	9.46562	9.9853	9.81275	9.9682	10.3602	10.2662	10.4216	10.6329	9.73437	10.245	9.53495	9.2712	9.78062	9.05546	8.73065	9.85623	9.44389	9.29872	9.6697	9.76415	9.65732	9.73369	9.32966	9.79467
Capn2	NM_009794	1	10.9066	10.8173	10.8921	9.53851	9.58946	9.2314	9.631	9.34476	9.79821	9.10678	8.86991	9.12404	9.38141	9.45003	9.64583	9.51647	9.59184	9.32154	9.17324	8.50709	8.70212	8.66225	8.70545	7.95093	8.31515	8.93587	8.88811	8.54622	7.93489	8.99411	8.66298	8.54375	8.63385
Capza1	NM_009797	1	8.99473	9.84134	10.0856	8.34091	7.755	8.05284	8.36753	8.62376	8.48777	8.35374	7.64272	8.03756	8.56568	8.88107	8.65016	8.65875	8.73184	7.48402	8.48151	8.35826	8.58297	8.0746	7.55623	7.46895	6.33251	8.20114	7.74009	7.58459	8.21323	8.46905	8.55112	8.70654	8.0527
Card19	NM_026738	1	10.7429	10.7786	10.8381	9.34531	8.98456	9.73679	9.51593	9.5293	9.58393	9.20139	8.78878	9.10255	9.83005	10.2216	10.3463	10.1418	10.3897	8.97036	9.61939	8.22704	7.95478	8.31462	9.21944	7.84992	7.98825	8.55837	8.28815	7.955	8.12238	8.98451	9.29547	8.99352	9.07927
Cbfb	NM_001161458	1	8.70772	10.0657	9.73825	7.88515	7.69435	7.37425	7.86014	7.9099	8.08945	8.25426	7.53313	7.72537	7.65679	8.38309	8.03958	8.59573	8.3816	7.48402	8.15402	8.5351	8.04771	8.18623	7.607	7.78574	7.24757	8.025	7.61174	7.36925	8.3396	8.64997	8.3816	8.66753	8.11634
Ccdc109b	NM_025779	1	10.8106	10.6931	10.968	6.77017	6.20393	6.79448	6.99624	6.59951	6.63163	6.77034	6.58936	6.72893	7.08355	8.69896	8.84451	9.4645	8.64161	6.71832	7.08105	7.29448	6.97657	7.30777	7.8371	6.69409	5.99084	6.92376	6.81249	6.80868	7.3099	7.65948	7.59729	7.78104	7.59756
Ccdc115	NM_027159	1	9.29089	9.73131	9.88441	8.01078	7.49539	7.52521	7.98076	7.92547	7.93931	7.6173	7.73635	7.6325	8.13748	8.5579	8.40802	8.42495	8.26556	7.81446	7.82781	8.22704	7.85544	7.98482	8.01685	7.71856	7.53877	8.08613	7.74009	7.61755	7.83829	7.98244	8.41394	8.03201	7.76574
Ccdc12	NM_028312	1	11.0135	10.7222	10.8366	9.34133	9.34831	9.34403	9.43379	9.50878	9.21488	9.01424	8.7196	8.78421	9.60699	10.2059	10.295	9.73694	9.98739	9.09716	9.0274	8.98433	8.74716	9.10017	9.45248	8.94173	8.97164	8.54391	8.98011	8.62398	9.0123	9.62061	9.69144	9.43793	8.98013
Ccdc125	NM_183115	1	9.43414	9.37663	9.52337	7.29962	6.60635	6.74063	7.1064	7.11609	7.09391	7.10001	6.84004	6.81597	7.22164	6.07045	6.8347	6.47362	6.34875	5.64386	6.86026	7.15704	6.89887	6.81188	6.9561	6.69409	6.50438	6.51322	7.05743	6.28714	6.79608	6.91905	6.65867	6.72413	5.64386
Ccdc180	NM_198660	1	8.0262	7.89523	7.82221	5.69466	5.72697	5.64386	5.73815	5.71727	5.64386	5.64386	5.64386	5.73601	5.64386	5.64386	5.75857	5.76339	5.94146	6.58616	5.64386	5.83623	5.73612	5.64386	5.73798	5.64386	5.9116	5.64386	5.64386	5.64386	5.82762	5.64386	5.64386	5.79629	5.64386
Ccdc69	NM_177471	1	7.88554	8.24141	8.13222	5.83719	6.1447	5.75668	5.73815	5.91738	5.83345	6.16585	5.84069	5.98172	5.94666	6.47099	6.60866	6.89607	6.18804	5.64386	6.02112	6.53596	6.58831	6.66545	6.91639	6.06031	6.55741	6.45261	6.0917	6.20277	6.64108	6.91905	6.97274	7.00011	6.20842
Ccl6	NM_009139	1	11.8071	12.2922	12.8102	10.7229	10.3553	10.374	10.3361	10.2235	9.70013	9.93359	10.3855	10.5361	10.9274	11.9636	12.0915	12.3545	11.9727	10.3481	10.3502	9.98422	9.2557	9.0494	10.4669	9.53666	10.1213	10.0665	9.88719	10.729	10.3364	10.6967	11.6729	11.5019	9.79467
Cd300lb	NM_199221	1	8.99473	9.54871	9.7642	5.79121	5.72697	5.64386	5.98884	5.85372	5.83345	5.64386	5.74564	5.94357	5.69894	7.25947	7.05273	7.85421	7.38728	6.27888	5.76208	5.64386	5.9046	5.86129	5.64386	5.8251	5.64386	5.84592	5.64386	5.76649	5.82762	6.32975	6.02505	6.05998	6.20842
Cd300lg	NM_001160712	1	10.0028	10.0506	10.0491	6.36217	6.01843	7.08116	6.65323	7.11609	6.74616	6.16585	7.09269	6.93743	6.62431	6.78414	6.91109	6.47362	6.62474	5.88792	6.28084	8.35826	8.63181	8.74662	7.77185	8.31159	9.46344	8.4846	8.91166	8.36398	7.73476	8.11153	8.62204	8.1499	7.59756
Cdc40	NM_027879	1	8.67391	9.32073	9.37128	7.45507	7.05538	7.493	7.17543	7.31834	7.72461	7.47305	7.42478	7.38453	7.67064	7.13256	7.47805	7.90709	7.52824	6.27888	7.70033	7.64225	7.74875	7.06651	7.53016	6.73998	7.86748	7.75069	7.33805	6.98743	7.92148	7.79745	7.85455	7.85235	7.0641
Cdc42ep3	NM_026514	1	10.2466	10.5866	10.8442	7.41017	7.02286	7.99651	7.55804	7.45336	7.00468	7.03299	6.67785	7.28125	8.10725	7.61639	7.51115	7.09148	7.05581	6.58616	7.38734	7.64225	7.97385	8.30228	8.05392	7.8707	7.92913	8.025	8.43627	8.02219	7.24679	8.21366	8.06264	7.66701	8.0527
Cdc42se1	NM_172395	1	11.1749	10.6635	11.0677	8.4922	7.85075	8.65031	8.69591	9.19864	8.53406	8.38095	8.29626	7.94404	8.94187	9.23004	9.05557	9.11716	9.09125	8.99663	8.66723	8.5351	8.73603	8.76472	9.50027	8.80809	7.86748	8.80863	8.36979	7.955	9.09227	9.06869	9.29112	8.79968	8.54415
Cdca4	NM_028023	1	9.60089	9.57549	9.49653	7.9176	7.08718	7.26405	7.45073	7.63479	7.46272	7.22539	7.28527	6.91787	7.87582	7.64767	7.96985	7.48839	7.83006	7.48402	7.4765	7.96408	7.50833	6.9762	8.17665	7.23259	6.88234	7.84803	7.16589	7.10056	7.3505	7.92338	8.09292	7.9531	7.30162
Cdk2ap1	NM_013812	1	9.76648	10.806	10.5686	9.50687	8.74641	9.4102	9.36895	8.97748	9.29233	9.29017	8.62483	8.75697	9.71783	9.55275	9.52137	8.76283	9.34738	7.55644	9.10216	9.11996	8.89456	9.12139	8.43736	8.74197	8.33046	8.9469	9.3456	8.43966	8.19104	8.87447	9.94208	9.25267	7.98614
Cdk2ap2	NM_026373	1	11.2092	11.2977	11.6353	9.85842	9.871	10.0781	9.8684	9.93903	9.66104	9.73704	9.70904	9.67982	10.0968	10.8583	10.938	10.4352	10.6865	9.30061	9.25113	9.57598	9.22419	9.70297	9.91727	9.4217	9.30967	9.44389	9.89115	9.46157	9.84805	10.4917	10.7849	10.5225	9.67298
Cds2	NM_138651	1	9.80995	9.31438	9.93669	8.30865	7.69435	8.03057	7.96135	8.46236	8.33405	7.76917	8.13055	8.0909	8.55826	8.47314	8.39034	8.12362	8.53427	8.26703	8.29798	9.0244	8.92428	9.09302	8.54544	8.59988	8.8705	8.85621	9.08052	8.47006	7.65598	8.64997	8.87529	8.60697	8.34604
Cebpe	NM_207131	1	8.0262	8.13017	7.84671	5.64386	5.64386	5.64386	5.64386	5.64386	5.67723	5.73102	5.67858	5.69067	5.8032	5.76291	5.64386	5.87376	5.64386	5.64386	5.76208	6.29515	6.12536	5.92704	5.82635	5.73731	5.73874	6.18092	6.19769	5.72675	5.88401	5.73828	5.69738	5.79629	5.64386
Cenpa	NM_001302131	1	11.6054	11.4046	11.3193	8.59609	8.65387	8.22939	7.88096	8.33989	8.15607	8.47232	8.87741	7.87477	9.29017	8.59046	8.91423	8.73385	9.02142	7.6254	8.52397	8.92205	8.27999	8.53095	9.21126	9.07302	8.51603	8.73419	8.66602	7.81045	8.38915	8.49632	9.93374	9.38481	7.6841
Cenpf	NM_001081363	1	9.35631	9.26258	9.11314	7.67346	7.71485	7.14473	6.99624	7.00324	7.2125	7.47305	7.38327	6.58765	7.85171	6.6669	7.30008	6.54209	7.38728	7.242	7.2725	7.41995	7.15428	6.6264	7.39221	7.62384	7.27948	7.59112	6.99998	6.39247	7.24679	7.53347	7.91228	8.21898	7.6841
Cenph	NM_021886	1	8.56742	8.49816	8.09181	6.69727	6.84826	6.84639	6.60401	6.9124	6.52566	6.8888	6.80903	6.58765	6.97615	6.32384	6.66857	6.72991	7.31128	6.71832	6.72121	7.53538	6.37533	6.6264	7.39221	6.78445	6.50438	6.87838	7.08532	6.25957	6.46741	6.91905	7.53983	7.56456	6.77963
Cenpm	NM_001080158	1	9.32397	9.04217	8.50735	7.46973	7.49539	6.7678	7.03391	7.22077	6.89546	7.36818	7.20417	7.25033	7.83951	7.08764	7.3918	6.78745	7.36239	7.48402	7.01114	7.53538	7.18733	6.54496	7.30263	7.57403	6.55741	7.01042	7.11268	6.66893	6.35219	7.55957	7.87792	7.81713	6.42494
Cenpn	NM_028131	1	8.32749	8.44104	8.10202	6.39328	6.2608	6.40206	6.5002	6.71152	6.35051	6.49953	6.21655	6.31625	6.81093	5.97506	6.3032	6.54209	6.24363	5.64386	6.50087	7.29448	6.72966	6.26883	6.60281	6.86949	6.20537	6.51322	6.29644	6.31421	6.67344	6.87816	6.99429	7.03119	6.61316
Cep78	NM_198019	1	8.01274	7.52932	7.80981	6.77017	6.31553	6.13617	6.79159	6.9124	6.46961	6.59556	6.28575	6.431	6.70726	6.78414	6.69762	6.47362	6.78318	5.64386	6.66161	6.42058	6.37533	5.92704	6.69957	6.1982	5.9116	6.02312	6.43294	5.76649	6.43002	6.44624	6.60366	6.76166	6.20842
Cers2	NM_029789	1	10.3222	10.666	10.7757	8.73609	8.3863	8.92234	8.73073	8.83636	8.68117	8.45962	8.23341	8.25566	9.37296	9.54446	9.41606	9.13943	9.55935	7.81446	8.8452	8.90068	8.81218	8.91812	8.69375	8.56206	8.26821	8.82067	8.61909	8.38965	8.77196	9.10458	9.59953	9.02472	8.7183
Cfl1	NM_007687	1	14.1995	14.337	14.4877	12.5947	12.2577	12.9049	12.7119	12.9399	12.1894	12.4613	12.4939	12.3527	13.1479	13.747	13.7148	13.8865	13.6801	12.8397	12.5696	13.2887	12.2192	12.9577	13.21	12.7384	11.9582	12.729	12.7168	12.3002	13.2335	13.377	13.7373	13.3922	12.8466
Cherp	NM_138585	1	9.84456	9.64795	9.75776	8.58939	7.97495	8.55992	8.33772	8.38563	8.16786	8.23947	7.71141	7.97274	8.55079	8.79986	8.8249	8.68926	8.74152	7.48402	8.42886	9.22686	8.72482	8.55195	8.90125	8.28088	8.23605	8.57268	8.70249	8.27725	8.12238	8.89511	9.21974	8.92074	8.44849
Chil1	NM_007695	1	11.4605	11.3184	12.2115	5.83719	5.64386	5.9109	5.91001	5.71727	5.86277	5.89098	5.98643	5.82265	5.69894	7.04129	6.4808	7.5889	6.49334	6.95104	5.97292	6.74225	6.19204	8.62311	8.42326	7.59915	6.06596	8.29044	6.51726	6.05018	9.76039	5.91037	6.42479	6.9027	6.20842
Chil3	NM_009892	1	12.9193	13.2625	13.2812	5.83719	5.64386	5.80993	5.64386	5.64386	5.77299	5.73102	5.71249	5.73601	5.8032	5.97506	5.91519	6.32612	5.80033	5.64386	5.76208	6.92271	6.53795	6.41349	5.98832	5.64386	7.45741	6.51322	6.55764	5.72675	5.70775	5.91037	5.69738	6.38255	5.95359
Cic	NM_001302811	1	11.3524	10.5465	11.0066	8.26729	8.00855	8.46348	8.84108	8.41901	8.37532	8.38095	7.97159	8.39647	8.51286	9.3679	9.45486	9.84929	9.41551	8.70958	8.19663	8.56257	8.70212	8.94217	9.21944	8.28088	8.52936	8.51456	8.73807	8.87178	8.74937	9.14823	9.26476	9.07775	8.75874
Cited2	NM_010828	1	10.0919	10.1714	10.2017	8.03069	8.43654	7.99651	8.84108	8.71618	9.04947	8.62804	8.16157	8.81095	9.09348	9.64088	9.51322	9.66201	9.16508	8.26703	8.47287	8.41964	8.4666	8.08904	7.8371	8.4833	8.31515	8.61478	8.70249	9.0352	8.08678	9.51121	9.63769	9.6529	9.51668
Ckap2l	NM_181589	1	9.72167	9.68778	9.34573	7.34804	7.20781	7.20562	6.60401	7.00324	6.66529	7.13239	7.43497	6.431	7.5855	6.5393	7.00705	6.89607	7.11662	7.55644	7.54408	7.74176	7.45502	7.44876	7.93971	7.02586	6.88234	7.61897	6.97037	6.25957	7.03896	6.91905	7.87792	7.74402	6.92887
Ckap4	NM_175451	1	10.6503	10.5866	10.2415	8.76014	8.71622	8.97576	8.27619	8.48355	8.19116	8.8291	8.5234	8.14233	8.73339	8.92002	9.04995	8.88647	9.31531	8.22321	8.30773	8.56257	9.53148	9.10017	9.29106	8.11665	9.06614	8.86786	8.74682	9.62448	7.93489	10.1789	9.73689	9.79993	10.3256
Clec12a	NM_177686	1	10.8883	11.3279	10.79	6.53944	7.1183	6.17728	6.20238	6.1994	6.24315	6.10188	5.64386	6.45833	5.85262	8.2053	8.35431	9.22522	8.65192	6.0966	6.11299	6.83531	7.21965	6.54496	6.652	5.90783	6.55741	6.57139	6.81249	7.8572	6.76638	6.91905	7.35231	7.7992	7.0641
Clec2i	NM_001289706	1	9.17478	9.25597	9.93384	5.83719	6.2608	5.9109	5.91001	5.91738	5.74176	5.89098	5.84069	5.82265	5.8032	7.04129	6.86062	7.65222	7.31128	7.32727	6.11299	6.42058	6.53795	6.54496	6.87555	6.1982	6.60854	7.05187	6.43294	6.6478	6.31165	6.91905	6.25665	7.14915	6.42494
Clec4e	NM_019948	1	8.40168	8.70638	8.58947	6.08585	6.64959	6.17728	6.26707	6.14725	6.17467	6.449	5.77802	6.15866	5.85262	7.08764	6.86062	7.85421	6.74517	6.44069	6.93766	7.15704	6.63699	7.06651	6.652	6.78445	5.99084	7.56272	6.47572	6.6478	8.41808	6.2678	5.98256	6.64602	5.64386
Clic1	NM_033444	1	12.5255	12.4255	12.4694	11.1727	11.2887	11.4602	11.2269	11.3074	11.0269	10.8915	11.3251	10.9594	11.6363	11.8027	11.9477	11.5815	11.8234	11.5767	11.339	11.0584	10.6425	10.5432	11.1749	10.504	10.4817	10.676	10.365	10.3826	11.0949	11.2249	11.4405	11.3851	10.7026
Clint1	NM_001045520	1	10.5767	10.3557	10.7254	9.85563	9.65988	9.89921	10.0169	10.2172	9.73225	9.42044	9.04648	8.94733	10.1472	9.49372	9.69347	9.29631	9.66999	9.38258	9.80987	9.34233	9.38955	8.55195	9.52689	8.81882	8.55566	9.06297	8.87219	8.75319	8.98032	9.40006	9.79636	9.46662	9.11086
Cln5	NM_001033242	1	8.50146	9.38876	9.43325	8.27566	7.85075	7.88924	8.30729	8.07257	7.77173	7.76917	7.80083	7.66803	7.76402	8.38309	8.29851	8.74841	8.43032	7.48402	8.25829	8.08269	7.85544	8.08904	7.06907	7.57403	7.07647	8.10595	7.66815	7.72228	8.60585	8.26214	7.70576	7.96923	8.11634
Cmpk2	NM_020557	1	8.4222	9.17421	8.94751	6.23063	5.80552	6.29405	6.38833	6.09312	6.24315	6.59556	6.04083	6.37478	6.50573	6.94386	6.8347	5.97629	6.89154	5.88792	6.35797	6.42058	7.05031	6.77664	6.4443	6.32405	6.65794	6.62732	6.90927	6.82759	7.40932	6.79274	6.95086	7.17719	5.64386
Cmtm6	NM_026036	1	10.2379	10.3526	10.5631	9.48898	8.3605	8.82866	9.33164	9.35629	9.57288	9.14696	8.47483	8.58795	9.43106	9.8094	9.86973	9.6543	9.97923	9.25782	9.18916	9.22686	8.79083	8.52034	9.21126	8.41422	7.66493	9.0831	8.39229	8.31123	8.65529	9.38555	9.66481	9.57071	8.98013
Cnppd1	NM_026977	1	10.8734	10.7005	10.9819	9.48538	8.96757	9.5459	9.63713	9.48796	9.54603	8.97907	8.75257	9.26606	9.78621	9.9031	9.86973	9.84252	9.6801	9.30061	9.19967	8.96386	8.97249	9.3363	9.31417	9.08196	8.60686	9.06297	9.10116	8.94718	9.31373	9.23984	9.75278	9.35443	8.98013
Cnr2	NM_009924	1	7.62737	7.71423	7.88269	5.64386	5.64386	5.70135	5.82665	5.78709	5.70987	5.81322	5.67858	5.82265	5.69894	6.07045	6.05643	6.66998	6.29715	5.64386	5.76208	5.64386	5.64386	5.92704	5.98832	5.73731	5.64386	5.74841	6.03562	5.8428	6.26993	5.91037	6.02505	6.1757	5.95359
Commd8	NM_178599	1	9.90412	10.3984	10.4215	8.71162	8.50877	8.47177	8.84108	8.77752	8.909	9.03152	8.58419	8.39647	8.79158	9.04274	9.03864	9.47329	9.14333	8.30955	8.93603	9.47837	8.6674	8.9501	8.15975	8.67267	8.31515	8.93587	8.43627	8.59116	9.23461	9.13093	9.05007	9.37878	8.63385
Cox6b2	NR_110411	1	8.0262	7.89523	7.56609	6.23063	6.56177	6.33095	6.44535	6.71152	5.91967	6.03494	6.6254	6.72893	6.59556	7.13256	7.05273	7.13646	6.89154	6.58616	6.11299	6.29515	6.05546	5.86129	5.82635	6.54696	6.39209	6.18092	6.67241	6.41765	6.43002	6.20304	6.73746	6.47581	5.95359
Cpne1	NM_170588	1	7.98543	8.97937	9.21543	7.41017	7.17859	6.56586	7.36468	7.31834	7.41405	7.16406	7.27396	6.7947	6.88406	7.2994	7.96985	7.74227	7.69702	6.27888	7.65521	7.64225	7.48192	7.51441	6.87555	7.20013	7.07647	7.59112	7.44954	7.08494	7.42841	8.0016	7.86628	7.70603	7.50549
Cpsf2	NM_016856	1	9.84456	9.50479	9.50425	8.41096	8.20976	8.07477	8.50797	8.31646	8.16198	8.20943	7.97159	7.3987	8.45803	8.26703	8.41678	8.46076	8.56732	7.81446	8.18609	8.66752	8.45307	8.14537	8.42326	7.93129	7.42924	8.70849	8.1759	7.77193	7.70377	8.1635	8.48416	8.27196	7.76574
Csgalnact2	NM_030165	1	7.91479	8.92209	9.18214	6.08585	6.64959	6.17728	6.74693	6.2984	6.46961	6.81092	6.23999	5.94357	6.37652	7.08764	6.88607	7.71287	7.08654	6.0966	6.56732	6.74225	6.53795	6.74052	5.98832	6.38308	6.27034	6.83155	7.13953	6.88286	6.53941	6.87816	6.71167	7.06159	7.50549
Ctps2	NM_001168569	1	8.69091	9.52692	9.35857	7.55471	7.37172	7.12385	7.45073	7.47469	7.65929	7.54697	7.09269	7.41274	7.5855	7.61639	7.44417	7.55617	7.95187	6.27888	7.59276	7.87922	7.50833	7.17874	7.06907	6.69409	6.88234	7.24296	7.38368	7.72228	7.06359	7.47982	7.74442	7.64709	7.91635
Ctse	NM_007799	1	10.2722	10.7624	10.895	9.68078	8.63248	9.40588	9.16342	9.5293	9.26788	8.72678	8.67729	9.4508	9.45926	7.9023	8.32668	8.07823	8.13937	7.242	9.58371	7.92227	7.68073	7.0954	6.69957	6.32405	5.99084	7.41169	6.70873	7.10056	6.53941	7.98244	7.90092	7.56456	8.11634
Ctsg	NM_007800	1	9.96131	9.71694	8.82342	5.64386	5.72697	5.64386	5.64386	5.64386	5.67723	5.64386	5.64386	5.64386	5.64386	5.64386	5.64386	5.64386	5.64386	5.64386	5.64386	5.64386	5.64386	5.64386	5.64386	5.64386	5.64386	5.64386	5.64386	5.68591	5.64386	5.64386	5.64386	5.64386	5.64386
Cyb5r4	NM_024195	1	8.33833	9.33334	9.23876	8.34887	7.67355	7.6473	8.27619	8.45164	8.43508	8.03201	7.8165	7.53324	8.06593	7.70827	7.55943	7.93282	7.69702	7.32727	8.50714	8.22704	7.896	7.7687	8.05392	7.78574	7.71247	8.1255	7.16589	7.73235	8.13405	7.86178	8.01072	7.66701	6.77963
D1Ertd622e	NM_133825	1	8.43235	9.68778	9.59741	8.39569	8.30749	7.78668	8.14466	8.44085	8.41543	8.31194	8.26232	8.11684	7.80225	7.82232	7.72378	8.16762	8.30529	7.55644	8.80444	7.83484	7.50833	7.35631	6.99475	7.13293	7.21493	8.04566	7.38368	7.52792	7.22512	7.39541	7.85455	7.83485	7.0641
D230025D16Rik	NM_145604	1	9.70083	9.16012	9.44533	7.52694	7.02286	7.60272	7.70536	7.76165	7.70855	7.76917	7.86254	7.38453	7.5708	7.82232	7.9817	7.85421	7.93508	7.242	7.70033	7.78904	7.48192	7.82153	7.85822	7.06243	8.21969	7.69943	7.74009	7.82933	8.19104	7.47982	8.13232	7.92029	7.59756
Dap	NM_146057	1	10.9443	10.8549	11.0612	10.0729	9.00134	9.61488	9.61245	10.0814	9.93041	9.76312	9.42189	9.1494	10.3821	10.2268	10.1396	9.51647	9.90791	8.94361	9.69937	9.58939	9.71836	8.97363	9.64701	8.51004	9.18041	9.4124	9.2065	9.35484	8.86597	9.7223	9.91692	9.7068	9.41912
Dars	NM_177445	1	8.83559	9.95178	9.69169	9.07022	9.02617	8.44676	9.08485	8.79458	8.82958	8.98794	8.84337	8.83198	9.28118	9.03093	8.9204	8.91257	9.32822	7.6254	9.02149	9.13834	8.57049	8.36293	7.53016	8.99	8.21969	8.82067	8.68437	8.60218	8.34964	9.13093	9.432	9.01698	7.98614
Daxx	NM_007829	1	9.60538	9.17421	9.6189	7.89605	7.49539	7.83887	7.36468	7.79594	7.75619	7.54697	6.97189	7.46754	7.75104	8.22617	8.39921	8.29211	8.30529	7.928	7.4415	7.69287	7.48192	7.93774	8.09006	7.35561	7.07647	7.77565	7.66815	7.53944	7.80946	8.14638	8.30608	8.00096	7.76574
Dazap2	NM_011873	1	11.6733	12.3867	12.3524	11.0439	10.6173	10.5662	11.1646	11.2311	11.4568	10.9426	10.8452	10.4822	11.1673	11.1911	11.1759	11.2389	11.1335	10.4561	11.146	10.9219	10.8269	10.5248	9.94714	10.5911	10.5256	10.8418	10.5836	10.2311	10.812	10.9691	11.1418	10.9518	10.3655
Dbnl	NM_001146309	1	11.2297	11.1325	11.2394	9.57626	9.21072	9.55763	9.81532	9.76823	9.69606	9.62772	9.31833	9.26992	9.88454	10.2676	10.3255	10.1906	10.3396	9.68677	9.69566	10.0439	9.60672	9.80705	9.88163	9.85085	8.81715	9.92306	9.69694	9.38706	9.85865	10.3717	10.814	10.5225	10.0276
Dcaf7	NM_027946	1	9.03525	9.39479	9.44131	8.54162	7.95784	8.30555	7.92172	8.05852	8.23666	8.22453	8.08597	7.69124	8.31548	8.47314	8.72966	8.65875	8.54537	6.83937	7.93238	8.66752	8.45307	7.98482	7.33311	7.95093	6.44933	8.00402	8.06821	8.09421	7.98732	8.30904	8.82206	8.81761	8.0527
Dck	NM_007832	1	10.0231	9.84575	10.2159	6.69727	6.60635	6.68469	6.99624	7.47469	6.74616	7.19505	7.06671	6.31625	7.43136	7.67829	7.95789	7.93282	7.71679	6.44069	7.33106	7.29448	7.18733	6.81188	7.99795	7.38479	7.00193	7.50419	6.59692	6.78953	8.11061	8.02051	7.49518	7.54317	6.77963
Dclre1b	NM_133865	1	8.78896	9.37052	9.40053	6.62051	6.46826	6.84639	6.55304	6.8485	6.95111	6.449	6.64309	6.70632	6.50573	7.08764	7.11865	7.22241	6.99234	5.64386	6.50087	6.92271	7.01391	7.0954	7.17383	6.73998	6.06596	6.92376	6.74415	6.88286	7.18078	7.90313	7.78207	7.74402	7.30162
Dctpp1	NM_023203	1	8.99473	9.00325	8.72115	8.89662	8.73642	8.76938	8.59873	8.81979	8.38039	8.55825	8.86615	8.85272	8.94187	9.05446	9.06117	8.51287	9.78685	8.08314	8.01805	8.26098	8.15187	8.0746	8.69375	8.92195	8.85999	8.42274	8.45776	7.67087	7.6397	9.08675	9.72082	9.60208	8.54415
Dcun1d5	NM_029775	1	9.42908	9.95178	10.0063	8.88572	8.28024	8.17967	8.79795	9.08538	8.72971	8.89664	8.48467	8.06447	8.75305	9.00701	9.03295	8.56315	8.79831	7.48402	8.83174	9.08249	8.70212	8.23896	7.20712	8.4833	8.41908	8.61478	8.3237	8.03851	8.50156	8.81071	9.15425	8.84409	8.44849
Def8	NM_001281803	1	8.77307	8.35708	8.53021	6.62051	6.36826	6.87166	6.87696	6.63781	6.6145	6.81092	6.6254	6.72893	6.81093	7.79464	7.3189	7.09148	6.82022	6.27888	6.28084	7.00512	6.97657	6.66545	7.20712	6.59768	6.44933	6.87838	6.99998	6.86467	6.96246	7.07192	7.35231	7.03119	6.77963
Dek	NM_025900	1	11.9042	12.1604	11.7493	10.029	10.2713	9.49396	9.63713	9.71098	9.90422	10.1187	10.2097	9.8048	9.56683	9.21967	9.1843	10.0913	9.79617	9.78046	9.95036	10.5555	10.3712	10.0027	9.59135	10.1977	10.4575	10.1548	10.1106	9.82829	10.3664	9.99034	9.56395	10.4668	9.34137
Dgkg	NM_138650	1	9.44921	9.45949	9.49266	6.77017	6.77204	6.59649	6.32896	6.9124	7.08149	6.03494	5.92989	6.58765	6.62431	6.47099	6.26489	6.24629	6.85633	5.64386	6.66161	6.15779	6.37533	5.98993	6.06296	6.1982	6.33251	6.02312	5.91648	5.98432	5.82762	6.38917	6.42479	6.56342	5.64386
Dhx9	NM_007842	1	10.0823	9.8191	9.75452	8.49937	8.3863	8.29625	8.88296	8.93965	8.53406	8.66171	8.20986	8.47881	9.08833	9.08905	9.15841	9.1722	9.04507	8.13135	8.59737	8.76535	8.64377	8.31462	8.88076	8.71923	7.61578	8.54391	8.48942	7.9202	8.4276	8.27795	9.69144	9.18523	7.30162
Diaph1	NM_001305981	1	11.1718	10.5356	11.0268	9.0654	8.79536	9.21175	9.10268	9.01435	9.12096	8.55825	8.44488	8.34617	9.02507	9.54446	9.42911	9.54177	9.39725	9.67054	9.00959	8.96386	8.58297	8.15912	9.23567	8.11665	8.51603	8.39078	8.45776	8.14785	8.09874	9.17379	9.25587	9.03242	8.29195
Diaph2	NM_172493	1	8.65669	9.17421	8.91891	7.19761	7.39732	7.3202	7.55804	7.31834	7.49116	7.66235	7.26256	7.45403	6.93083	7.64767	7.54351	8.51287	8.19682	6.71832	7.35006	7.58981	7.45502	7.33224	6.69957	6.98832	7.37118	7.59112	7.88994	7.74234	6.96246	7.65948	7.46464	8.07736	7.40715
Dleu2	NR_028264	1	9.32941	9.62249	9.69843	6.72199	6.64959	6.6265	6.91783	6.39103	6.35051	6.49953	6.37316	7.03136	6.70726	7.95326	7.72378	8.07823	7.33706	7.81446	6.66161	7.29448	7.15428	7.75065	6.60281	6.73998	6.50438	7.16953	6.74415	7.10056	6.98841	7.96302	7.38531	7.49942	8.54415
Dna2	NM_177372	1	9.75035	9.88483	10.1337	6.3304	5.72697	5.80993	6.06359	6.1994	6.07801	6.22711	5.84069	5.90436	6.65249	6.83937	6.37688	6.32612	6.74517	5.64386	6.11299	7.00512	6.19204	6.21719	6.38735	6.54696	6.79671	6.25378	6.0917	5.95021	6.31165	6.74805	6.83621	6.93591	5.95359
Dnajc9	NM_134081	1	9.00156	9.60179	9.33279	7.62189	6.95553	6.6265	7.33481	7.22077	7.15442	7.31275	7.56131	6.87798	8.07637	7.2994	7.60614	7.68287	7.98486	6.58616	7.51069	7.47883	7.77073	7.15149	6.4443	7.46895	7.24757	7.41169	7.74009	7.06913	7.22512	7.53347	8.46885	8.0624	7.18774
Dnase1l1	NM_027109	1	9.64519	9.70728	9.85755	8.06006	7.65244	7.5092	7.86014	7.98612	7.97331	7.78962	8.013	7.67968	7.78962	9.06608	8.7506	9.23559	9.12124	7.6254	8.08763	7.47883	7.25126	8.01537	7.65605	7.71856	7.64057	7.69943	8.06821	8.09421	8.31929	8.39851	8.24447	8.0624	8.0527
Dr1	NM_026106	1	8.82021	10.1784	9.80539	7.6087	7.31913	7.08116	7.36468	7.79594	7.73257	7.52275	7.57981	7.15338	7.06269	7.97808	7.33747	8.38823	7.96846	6.95104	7.88104	8.08269	7.87586	7.23175	6.74561	7.26435	6.33251	7.84803	7.40597	7.43236	7.79483	8.23001	7.95687	8.27196	8.23576
Dut	NM_023595	1	9.89681	9.8191	9.3797	8.39569	7.4715	7.69055	8.03749	8.45164	7.7871	8.36741	8.05986	7.76966	8.90134	8.07331	8.72966	7.68287	8.54537	7.48402	7.74409	8.616	7.72644	7.03703	8.42326	8.09915	7.78095	8.025	7.77476	7.14645	7.75002	8.58792	9.08062	9.0628	7.6841
Ear12	NM_001012766	1	8.5301	8.5745	8.81102	5.69466	5.88005	5.70135	5.98884	6.0369	5.89149	5.96475	5.74564	5.64386	5.69894	6.6669	6.69762	7.45326	6.70614	5.88792	5.97292	6.15779	6.19204	6.16364	5.73798	5.8251	5.64386	5.74841	5.7866	5.68591	6.18269	5.9893	5.98256	6.28283	5.95359
Ear2	NM_007895	1	8.88815	8.91372	9.09792	5.69466	6.01843	5.86131	6.13465	6.0369	6.12716	6.449	5.77802	5.64386	5.69894	6.83937	6.98365	7.93282	6.92593	6.27888	6.31992	6.92271	6.58831	6.45866	5.90961	6.06031	5.64386	5.93723	5.853	5.76649	6.76638	6.32975	6.06633	6.38255	6.20842
Ear3	NM_017388	1	8.5301	8.5745	8.81102	5.69466	5.88005	5.70135	5.98884	6.0369	5.89149	5.96475	5.74564	5.64386	5.69894	6.6669	6.69762	7.45326	6.70614	5.88792	5.97292	6.15779	6.19204	6.16364	5.73798	5.8251	5.64386	5.74841	5.7866	5.68591	6.18269	5.9893	5.98256	6.28283	5.95359
Eif4ebp1	NM_007918	1	10.5326	10.5786	10.6886	8.03069	8.29393	8.38667	8.22827	8.3046	7.99994	8.42082	8.36717	8.05556	8.71347	9.53613	9.59655	9.4014	9.7393	7.48402	8.3366	8.74151	8.23327	8.52034	8.73998	8.62455	9.01018	7.98275	8.87219	8.42732	8.56331	9.0504	9.36328	9.08517	8.75874
Elane	NM_015779	1	9.234	9.37663	8.15202	5.64386	5.64386	5.64386	5.64386	5.64386	5.64386	5.64386	5.64386	5.64386	5.64386	5.64386	5.64386	5.64386	5.64386	5.64386	5.64386	5.64386	5.64386	5.64386	5.64386	5.64386	5.64386	5.64386	5.64386	5.64386	5.64386	5.64386	5.64386	5.64386	5.64386
Elf4	NM_019680	1	10.6196	10.2861	10.3632	8.41096	8.23836	8.80261	8.62365	8.63327	8.54314	8.4468	8.3883	8.16737	8.70676	9.42317	9.37169	9.52495	9.37875	8.5052	8.42886	8.19228	8.32525	8.56233	8.81749	8.92195	8.48898	8.30766	8.0112	8.08639	9.32396	9.07775	9.20133	9.23943	9.01394
Emilin2	NM_145158	1	12.0281	11.7994	12.0802	6.3304	6.77204	6.8965	6.5002	6.24975	6.24315	6.28586	6.30812	6.5627	6.44256	9.17743	8.93267	10.1362	9.06063	7.69121	6.98706	7.87922	7.0858	6.9448	6.69957	6.91019	6.39209	7.13137	6.87773	6.68973	7.6397	7.90313	7.56885	8.09216	7.18774
Eml2	NM_028153	1	8.41198	7.69482	8.20033	7.28311	6.46826	7.08116	7.14133	7.76165	7.36368	6.92622	6.69491	6.68336	7.92286	6.94386	7.63646	6.78745	7.25829	6.58616	7.19054	6.42058	6.58831	6.58625	6.87555	6.26251	6.50438	6.57139	6.34339	6.17353	6.04107	6.87816	7.35231	6.64602	6.77963
Erlin1	NM_145502	1	9.07466	9.22246	9.02467	8.15384	7.99184	7.58755	8.27619	8.21874	8.10792	7.59424	7.27396	7.57127	7.85171	8.07331	7.52742	7.77108	8.15395	6.95104	8.3366	7.83484	7.48192	7.25754	7.17383	6.86949	5.99084	7.87138	7.19178	6.84626	7.06359	7.53347	7.78207	7.85235	7.18774
Espl1	NM_001014976	1	9.40866	8.77269	9.04068	6.72199	6.36826	6.6265	6.32896	6.4352	6.22068	6.28586	6.3518	6.19158	6.97615	7.17611	7.55943	7.55617	7.14608	7.15138	6.31992	7.87922	6.58831	6.50246	7.74942	6.69409	6.55741	6.62732	5.97728	6.08202	6.67344	7.10773	7.55441	7.28421	7.0641
Esyt1	NM_011843	1	12.7455	12.2825	12.3194	8.27566	7.5189	8.58305	8.63595	8.66144	8.13821	7.76917	8.02655	8.26342	8.4974	9.64863	9.74308	10.0566	9.77747	8.17801	7.86792	9.06339	8.42563	9.55484	9.16117	8.61227	8.52936	8.78424	9.2747	8.60766	9.20171	9.77893	9.57829	9.5278	9.65166
Exoc6	NM_175353	1	9.42908	9.41272	9.12821	7.74754	7.34567	7.58755	7.55804	7.76165	7.98668	7.97957	7.19219	7.5587	7.72473	7.73764	7.9817	8.52982	7.93508	8.26703	7.89405	7.96408	7.87586	7.90548	8.0355	7.78574	8.21969	7.84803	8.13645	7.71214	8.07471	8.12906	8.34013	8.27196	7.40715
Exosc3	NM_025513	1	9.23979	9.3396	9.26625	8.03069	7.23645	7.74627	8.30729	8.32822	7.74049	7.90657	7.85497	7.75871	8.53573	8.43779	8.44275	8.1011	8.40616	7.32727	7.86792	7.69287	7.87586	7.61758	7.58184	8.2011	8.08171	7.61897	7.92122	7.73235	7.4842	7.96302	8.66298	8.39646	6.92887
Exosc8	NM_027148	1	10.0628	10.1923	9.65054	8.37247	7.97495	7.35645	8.10981	8.07257	7.9045	8.2689	8.11161	8.13388	8.46599	8.2053	7.96985	8.44297	8.62078	8.08314	8.15402	9.15648	8.59533	8.58288	8.36544	8.13394	8.13501	8.61478	8.67522	8.5174	8.07471	8.84294	8.9762	9.07775	8.23576
F10	NM_001242368	1	10.7224	10.6075	10.9053	5.92491	5.64386	5.95887	5.64386	5.71727	5.83345	5.81322	5.64386	5.90436	5.69894	7.13256	7.11865	7.85421	6.53848	6.71832	5.92303	6.42058	6.12536	6.21719	6.32805	5.64386	6.50438	6.02312	5.71699	5.98432	6.08984	5.91037	5.8936	5.99842	5.95359
F13a1	NM_001166391	1	12.9768	13.7265	13.774	6.69727	7.02286	6.29405	7.07061	6.34545	6.24315	6.92622	6.79327	8.2001	6.62431	10.6109	9.93217	11.1429	10.5276	7.48402	6.96257	7.53538	6.58831	7.15149	6.91639	7.32583	6.20537	6.96773	7.87403	7.79131	8.14563	8.85352	8.72229	8.38449	8.7183
F5	NM_007976	1	8.07884	7.87812	8.49965	5.96687	6.01843	5.9109	5.73815	5.97838	5.83345	5.89098	5.71249	5.86409	5.752	5.64386	5.91519	5.97629	5.64386	5.64386	5.64386	6.83531	6.77386	6.26883	6.06296	5.8251	5.82774	6.32315	6.87773	6.05018	5.99059	5.64386	5.8936	6.05998	5.64386
Fabp5	NM_010634	1	9.11932	9.25597	8.4365	6.64657	6.64959	6.7678	6.79159	6.63781	6.6145	7.28422	7.02683	6.7947	6.78569	7.25947	6.66857	7.71287	6.74517	9.02243	6.91233	7.69287	7.37119	7.96929	8.0355	7.26435	7.4005	8.42274	8.03999	8.03851	8.35962	6.79274	6.42479	6.33355	5.95359
Faim	NM_001122851	1	9.67968	9.66301	9.48097	8.02077	7.54203	7.73253	8.17868	8.14086	8.03255	7.90657	7.53313	8.06447	8.22453	8.50765	8.58946	8.40671	8.70239	7.32727	7.94493	8.26098	7.95478	7.65687	8.33564	7.46895	7.86748	8.08613	7.93661	7.71214	8.26723	8.05761	8.57276	8.31045	7.84301
Fam107b	NM_025626	1	11.2092	11.3467	11.1114	9.38839	8.8795	8.69347	8.99222	9.36774	9.37094	9.26848	9.20378	8.87823	9.38561	8.52459	8.57387	8.96338	8.96466	8.99663	9.42698	9.15648	8.92428	8.44378	8.8704	8.95151	7.18155	8.79649	8.31195	8.46403	8.11061	9.11342	9.49003	9.0999	8.83638
Fam129a	NM_022018	1	9.54586	9.37663	9.62952	7.71098	7.42247	7.54105	7.90148	7.97119	7.74049	7.19505	7.61609	7.73657	7.5855	7.84947	7.72378	8.14579	7.77454	7.32727	7.82781	6.92271	6.89887	6.74052	6.4443	6.32405	6.13734	6.38933	6.70873	6.84626	6.08984	6.83609	6.88317	6.96837	6.61316
Fam129b	NM_146119	1	10.535	10.368	10.2644	9.64246	9.22509	9.56926	9.67933	9.45078	9.4062	8.88718	9.11781	9.38115	9.72449	9.05446	9.30247	9.15044	9.7393	8.39102	9.31054	8.35826	9.0732	8.95798	8.89104	8.49673	8.92196	8.73419	9.55456	8.81607	7.50233	8.58792	9.28676	8.96162	8.23576
Fam49b	NM_144846	1	10.9461	12.0625	12.163	8.07931	7.81321	7.67627	8.32259	8.23133	8.21409	8.95211	7.90716	7.75871	8.27072	9.46767	9.50913	10.0448	9.30228	7.6254	8.24819	9.38912	8.92428	8.65257	9.50697	8.77541	7.27948	8.84446	8.25169	8.02219	9.73378	9.3635	9.03975	9.31711	9.04698
Fam65b	NM_029679	1	7.74604	8.11565	8.09181	5.79121	5.72697	6.00527	5.73815	5.85372	5.74176	5.73102	5.71249	5.69067	5.752	6.07045	6.05643	6.24629	5.87261	5.64386	5.81775	6.00596	6.25575	6.54496	6.20159	5.98609	6.50438	6.10417	6.24791	6.23145	5.93829	6.44624	6.14549	6.42993	6.77963
Fam69a	NM_026062	1	8.78104	9.26258	9.34143	6.83954	6.20393	6.6265	6.26707	6.56015	6.68184	6.81092	6.6254	6.61218	6.70726	7.76642	7.35581	7.77108	7.83006	5.64386	6.69172	7.00512	7.0858	6.87987	6.20159	6.82759	6.60854	7.09218	6.77872	6.88286	6.60798	7.30574	6.71167	7.49942	7.59756
Fam89b	NM_181452	1	10.9931	11.3311	11.4747	8.37247	8.13565	8.11765	8.30729	8.52502	8.20839	8.28339	8.00618	7.92458	8.45803	9.76016	9.63835	9.93453	9.65981	7.928	7.99409	8.85697	8.23327	8.9342	9.27545	8.53628	8.20315	8.54391	8.45776	8.57447	9.0123	9.35607	9.47478	9.04007	8.75874
Fam96a	NM_026635	1	10.8956	11.0867	11.161	9.8246	9.35486	9.33497	9.64323	9.91193	9.54151	9.78875	9.59777	9.34135	10.0232	9.43218	9.87609	9.28637	9.79617	8.57659	9.56757	9.40438	8.97249	8.86038	9.25171	9.27355	8.6318	9.25269	8.94249	8.59116	8.9932	9.41443	9.74327	9.35443	8.34604
Fbxl14	NM_133940	1	10.0028	9.54329	9.81163	8.20731	7.26455	7.6326	8.01883	8.2438	8.20839	7.99726	7.8165	7.35577	8.48178	8.22617	8.2206	7.95809	8.35661	7.98159	7.91972	8.19228	8.10074	7.67612	8.36544	7.62384	7.37118	8.1826	7.61174	7.50462	7.70377	8.19713	8.65624	8.32305	7.59756
Fbxl6	NM_013909	1	8.88815	8.59559	8.94751	7.17989	6.56177	7.79991	7.50538	7.45336	7.36368	6.9627	6.51444	7.08493	7.7114	8.07331	8.26008	7.74227	7.9181	7.32727	6.8335	7.29448	7.01391	7.40328	8.14264	6.94979	6.39209	7.34655	7.11268	7.19093	6.70509	7.4241	8.39786	7.83485	8.0527
Fbxw4	NM_013907	1	9.58733	9.51035	9.69169	7.00973	7.54203	7.60272	7.90148	7.31834	7.42392	7.06689	7.07976	7.4404	7.46353	8.92002	8.47667	8.91257	8.22472	7.40777	7.14773	7.15704	7.39968	7.82153	8.17665	7.46895	6.75193	7.44318	7.74009	7.67087	7.38998	8.1635	8.13232	8.24571	7.84301
Fcho1	NR_131256	1	9.55981	8.87973	8.93042	6.16005	6.20393	6.36695	6.79159	6.5197	6.56186	6.49953	5.98643	6.48514	6.5363	7.21839	6.98365	7.18007	7.23105	6.0966	6.15682	7.00512	7.15428	6.9762	6.91639	6.59768	5.73874	6.57139	6.84548	7.10056	6.43002	7.73011	7.13672	7.47703	7.98614
Fcnb	NM_010190	1	8.4222	8.05603	8.07117	5.64386	5.64386	5.64386	5.64386	5.64386	5.64386	5.64386	5.64386	5.64386	5.64386	5.64386	5.64386	5.64386	5.64386	5.64386	5.64386	5.64386	5.64386	5.64386	5.64386	5.64386	5.64386	5.64386	5.64386	5.64386	5.64386	5.64386	5.64386	5.64386	5.64386
Fen1	NM_007999	1	9.54586	9.32073	9.0139	7.73545	7.34567	7.05932	7.53195	7.22077	7.08149	7.72738	7.43497	7.10234	7.61444	7.2994	7.57517	7.5889	7.69702	7.48402	7.42367	8.69261	8.63181	7.80413	8.40902	8.08143	7.37118	8.08613	8.03999	7.35628	7.46584	8.09378	8.80996	8.62744	7.76574
Fkbp1b	NM_016863	1	8.46238	8.46416	8.4365	6.19576	5.80552	6.71293	6.06359	6.09312	6.00101	6.10188	6.21655	6.45833	6.34232	7.21839	6.88607	6.94746	7.11662	6.58616	6.11299	6.29515	5.98201	6.36686	6.38735	6.26251	5.9116	5.74841	5.7866	6.11316	6.46741	6.2678	5.98256	6.05998	6.20842
Flna	NM_010227	1	12.8837	12.7386	13.0303	8.09831	8.02506	9.11454	8.43946	8.08649	7.83964	7.6173	8.14304	8.55037	9.34733	10.3929	9.85691	9.95351	9.70011	8.61101	7.65521	9.67999	8.92428	9.9523	10.2078	8.87131	8.81715	10.0255	9.75886	9.77328	8.77196	10.368	10.2901	9.47229	10.1543
Flot1	NM_008027	1	10.0661	10.2231	10.3611	8.85255	8.63248	9.02727	8.84108	9.05739	8.97088	8.83894	8.48467	8.7348	9.14894	9.37726	9.39405	9.45565	9.35371	9.07268	8.61319	8.47852	8.42563	8.80024	9.10045	8.62455	8.71584	8.77189	9.03834	8.40232	8.11061	8.91546	8.79162	8.79064	7.98614
Flot2	NM_008028	1	10.3358	10.0079	10.0959	7.88515	7.90529	7.85163	8.1954	8.04432	8.53406	7.5708	7.89982	7.82317	8.02341	8.38309	8.65016	8.33133	8.63124	6.71832	7.40562	8.15667	7.39968	7.90548	7.607	7.67198	7.73565	7.84803	7.87403	7.43236	7.68801	8.19713	8.09292	7.83485	8.5897
Fn1	NM_001276408	1	14.2102	14.2625	14.8286	8.25041	7.71485	8.84789	7.81759	7.47469	7.08149	6.54834	7.53313	8.27114	8.99787	10.6462	9.83092	9.16136	9.08366	7.05469	7.75838	9.1921	9.06433	8.74662	7.5036	7.23259	7.92913	9.15144	8.88811	8.79701	6.26993	9.82269	9.45937	8.46632	8.91005
Foxk1	NM_199068	1	9.40866	8.79109	9.13816	7.51285	7.49539	7.73253	7.60883	7.57682	7.80985	7.31275	7.07976	7.58372	8.02341	8.41978	8.57387	7.5889	8.18267	7.48402	7.70033	7.41995	7.48192	7.20549	8.30522	7.80745	7.51216	7.50419	7.74009	7.53944	7.03896	8.07581	8.27119	8.2589	7.84301
Foxred2	NM_001168260	1	9.45917	8.71604	8.63236	5.83719	5.72697	6.13617	6.20238	6.14725	5.97439	5.89098	5.84069	6.05511	6.07716	6.78414	6.80831	7.26354	6.74517	5.64386	5.76208	6.15779	5.98201	5.86129	5.73798	6.06031	5.64386	5.84592	5.91648	5.95021	5.88401	5.9893	6.35987	6.119	6.77963
Frmd8	NM_026169	1	9.48865	9.04217	9.39639	7.75952	7.54203	7.75986	7.55804	7.84589	7.74836	7.31275	7.26256	7.5587	7.55595	8.43779	8.5422	8.1011	8.10976	7.05469	7.67041	7.69287	7.72644	7.98482	7.39221	7.23259	6.55741	7.72529	7.87403	7.67087	7.65598	8.02051	8.18011	8.16399	7.40715
Furin	NM_001081454	1	8.86586	8.59559	9.12821	7.86311	7.4715	8.22939	7.99992	8.11392	7.97331	7.31275	7.09269	6.81597	8.24318	9.11166	9.15841	9.36407	8.91417	7.75415	7.2725	7.35858	7.48192	7.40328	8.22622	7.20013	6.96315	7.41169	7.68648	7.21985	6.93603	8.48275	8.84596	8.48887	7.84301
Fut7	NM_013524	1	8.56742	8.38157	8.4365	5.69466	5.64386	5.64386	5.64386	5.71727	5.64386	5.64386	5.64386	5.64386	5.69894	6.24422	6.1006	5.87376	6.13023	5.64386	5.76208	5.64386	5.64386	5.72003	5.73798	5.64386	5.64386	5.64386	5.71699	5.72675	5.64386	5.64386	5.749	5.64386	5.64386
G6pdx	NM_008062	1	11.8996	11.7532	11.7679	9.2466	9.12139	8.98736	9.0668	9.13979	9.1569	9.4335	8.89228	8.97123	9.25384	9.55275	9.70067	9.69996	9.6801	8.26703	9.14632	9.44923	8.96297	9.16292	8.70545	8.99	8.25222	8.9469	9.024	8.62398	9.74525	9.39282	9.74962	9.61752	8.83638
Galns	NM_016722	1	9.93657	9.60699	9.60461	7.84072	7.79407	7.70468	7.72852	8.14086	8.07073	7.68435	7.75274	7.5587	7.94581	8.22617	8.11688	8.42495	8.35661	7.32727	7.68545	7.47883	7.85544	8.11748	7.89954	7.46895	7.42924	7.80018	7.11268	7.59566	7.79483	8.35447	8.34013	8.39646	7.6841
Galnt9	NM_001122639	1	9.29645	9.1812	9.47705	5.64386	5.64386	5.64386	5.64386	5.64386	5.67723	5.64386	5.64386	5.64386	5.64386	5.97506	5.70235	5.97629	5.87261	5.64386	5.64386	5.64386	5.64386	5.64386	5.64386	5.64386	5.64386	5.64386	5.7866	5.64386	5.70775	5.73828	5.64386	5.99842	5.95359
Gapt	NM_177713	1	9.64955	10.1749	10.4477	5.64386	5.72697	5.70135	5.73815	5.78709	5.67723	5.64386	5.64386	5.73601	5.8032	6.24422	6.18507	6.24629	6.53848	5.64386	5.81775	5.83623	5.98201	5.86129	5.90961	5.64386	5.64386	6.32315	6.03562	5.72675	6.04107	5.91037	5.93878	6.119	5.64386
Gcnt1	NM_001136484	1	8.14205	8.7634	8.5967	6.77017	7.4715	6.68469	7.14133	6.97359	8.07073	6.64129	7.01329	6.97573	6.81093	7.13256	7.16099	7.13646	7.33706	7.32727	6.93766	7.41995	6.43159	6.74052	6.4443	6.1982	5.64386	6.73304	6.19769	6.49063	7.3505	6.83609	6.3927	6.52028	6.77963
Gdpd3	NM_024228	1	8.80467	8.60602	8.83571	6.45353	6.64959	6.96854	6.44535	6.63781	7.17794	6.59556	6.69491	6.7947	6.83572	7.2994	7.62138	7.82703	7.77454	6.0966	6.56732	7.29448	7.25126	7.44876	7.33311	7.69546	6.50438	7.05187	7.11268	7.08494	7.98732	6.95882	7.03644	7.14915	6.61316
Gins1	NM_027014	1	8.01274	8.44104	7.91779	6.67214	6.36826	6.09383	6.55304	6.39103	6.37105	6.34232	6.55238	6.7947	6.59556	6.24422	6.4808	6.16179	6.85633	5.64386	6.66161	7.58981	6.81675	6.54496	6.79024	6.91019	6.20537	7.01042	6.43294	6.51415	6.18269	6.91905	7.53983	6.9027	5.95359
Glipr2	NM_027450	1	11.2642	11.3248	11.2805	6.79366	6.46826	6.29405	6.91783	6.56015	6.07801	6.34232	6.30812	6.34582	7.12437	8.30676	8.00514	7.74227	7.67697	6.44069	6.66161	7.87922	7.65733	7.12372	8.05392	7.49594	7.14737	7.61897	7.85796	7.55085	7.57265	8.54938	8.77926	8.24571	8.54415
Gltp	NM_019821	1	10.9354	11.4972	11.4114	9.65214	9.38076	9.62234	9.82609	9.85209	10.1153	9.67245	9.12097	9.21493	10.0286	10.2371	10.2393	10.3613	10.2025	9.44113	9.5635	9.1744	9.2712	9.5233	9.40305	8.67267	7.86748	9.44389	9.22542	9.34831	9.69884	9.64519	10.2072	9.91265	8.94552
Glud1	NM_008133	1	12.053	11.9431	12.1672	9.73337	9.37433	9.57697	9.62484	9.78539	9.7887	9.59904	9.45982	9.36319	10.0865	10.2926	10.3645	10.3566	10.244	9.38258	9.49686	9.99434	9.51204	9.53916	10.4907	10.0044	9.65807	9.70002	10.1308	9.58336	9.75662	10.0422	10.508	10.2396	9.34137
Gm14548	NM_001166672	1	9.03525	9.13873	9.27981	5.69466	5.95089	6.00527	5.64386	5.71727	5.64386	5.81322	5.64386	5.64386	5.69894	5.64386	5.64386	5.87376	5.64386	6.0966	5.70418	6.15779	5.98201	6.41349	6.55189	6.26251	5.82774	6.18092	6.19769	5.76649	6.8537	5.64386	5.69738	5.79629	5.64386
Gm1673	NM_001310547	1	8.29449	8.18686	8.4919	5.96687	5.72697	6.00527	5.82665	6.09312	5.77299	5.96475	5.92989	5.73601	6.07716	6.5393	6.1006	5.76339	6.00717	5.64386	5.70418	6.00596	5.9046	6.41349	6.32805	6.32405	6.06596	6.73304	6.24791	5.95021	6.93603	6.2678	6.42479	6.05998	5.64386
Gm1966	NM_001277182	1	8.69934	9.32073	9.2843	6.48274	6.51576	6.13617	5.98884	6.0369	6.37105	7.19505	6.19271	6.37478	6.03494	6.83937	6.66857	8.03137	7.20328	6.83937	6.46645	6.92271	7.0858	6.70347	6.32805	6.91019	6.44933	6.96773	7.05743	7.11602	7.06359	7.14268	6.57534	7.92029	7.59756
Gm5424	NR_002687	1	8.79683	8.24141	7.73306	7.21513	6.98959	6.96854	6.83491	7.29457	6.7618	6.8888	6.60749	6.7947	7.12437	7.48403	7.37392	6.94746	7.33706	6.83937	6.88653	7.08309	5.82281	6.66545	6.652	6.94979	6.33251	6.32315	6.24791	6.11316	7.20312	6.65429	6.42479	6.96837	6.61316
Gm8615	NR_028061	1	7.69637	8.52038	8.58219	7.10673	6.73236	6.92091	6.65323	6.9124	6.7618	6.59556	6.16848	6.61218	7.10411	6.47099	6.66857	6.84278	6.58225	6.0966	6.69172	7.08309	7.12045	7.00694	7.55623	6.91019	5.99084	6.73304	6.55764	6.95342	7.40932	6.87816	6.63142	6.56342	5.64386
Gnb2	NM_010312	1	13.6144	13.0791	13.1468	11.7313	10.9251	11.2856	11.9415	11.9904	11.9755	11.6625	10.7121	10.8084	12.1379	11.8606	12.0812	11.9865	11.8415	11.0955	11.3638	11.5725	11.3308	11.0265	11.6	10.8614	10.4006	11.49	11.1119	10.4799	10.7046	11.4316	12.268	11.9304	11.4471
Gng10	NM_025277	1	10.9211	11.3545	11.6441	7.73545	8.13565	8.23914	8.09207	8.36294	7.41405	8.2689	7.60711	7.60831	7.99066	9.67922	9.83746	10.015	9.70011	7.32727	7.93238	8.19228	8.10074	8.36293	8.0355	8.29632	8.13501	8.25538	7.70457	8.01396	9.11011	9.23175	8.85187	9.25267	8.44849
Gnpda1	NM_011937	1	7.71311	8.49816	8.75389	7.16194	6.84826	6.79448	6.91783	7.06077	6.92355	6.7286	6.28575	6.70632	7.29498	6.24422	6.22554	6.54209	6.44674	6.44069	6.8335	7.53538	6.93825	7.23175	7.39221	6.49437	6.13734	7.13137	6.84548	6.88286	7.42841	6.20304	5.93878	5.86686	6.20842
Gpc1	NM_016696	1	8.2026	7.94538	7.77194	6.08585	6.01843	6.8965	6.13465	5.97838	5.97439	5.89098	6.26305	6.15866	6.47448	6.6669	6.4808	6.07202	6.18804	6.58616	5.70418	6.00596	6.43159	6.0502	6.55189	6.1982	6.13734	6.68114	6.43294	6.78953	5.70775	6.65429	6.60366	6.33355	6.42494
Gpr35	NM_022320	1	9.29089	9.18816	9.1965	7.51285	7.4715	7.61773	7.6579	7.16938	7.27924	7.54697	7.55198	7.50731	7.44754	8.41978	8.44275	9.27635	8.26556	5.88792	7.88104	7.15704	7.0858	6.81188	6.83352	5.98609	5.82774	7.01042	6.55764	6.53731	6.31165	6.87816	7.05706	7.60642	6.61316
Gpsm2	NM_029522	1	8.92456	8.63687	8.81102	8.26729	7.95784	7.74627	7.63358	8.25617	7.86883	8.4468	8.31845	7.4404	8.27072	7.25947	7.28101	6.89607	7.88353	6.44069	8.23803	7.58981	7.85544	7.8557	7.5036	7.44143	7.88832	7.82431	8.05417	7.33001	6.64108	7.70694	8.60112	8.2589	6.61316
Gpx1	NM_008160	1	14.416	14.4437	14.5785	12.0174	12.1165	12.505	12.0852	12.2458	12.1244	11.9184	11.9173	12.0529	12.4393	13.1128	13.1205	12.9241	12.9196	12.2633	12.1984	11.9324	11.7705	11.9017	12.7036	12.3655	11.7702	11.9035	11.8796	11.8103	12.7321	12.334	12.6346	12.4258	11.5884
Grk5	NM_018869	1	8.38087	8.30681	8.89563	6.00762	5.88005	6.29405	6.38833	6.34545	6.17467	6.22711	6.06727	6.19158	6.3073	6.89256	6.93568	6.66998	6.39857	6.44069	6.28084	6.53596	6.58831	6.84627	6.32805	6.43981	6.88234	6.73304	6.90927	6.41765	6.43002	6.79274	7.03644	7.00011	6.77963
Grk6	NM_001038018	1	11.0861	10.4686	10.5027	9.0113	8.42415	8.64299	9.01123	9.00705	8.76894	8.72678	8.37777	8.43135	8.72678	8.92002	9.07784	9.1722	9.35371	8.26703	8.4018	8.96386	8.80155	8.78259	8.68196	8.46975	8.23605	8.61478	9.01678	8.61856	8.47427	8.90532	9.6547	9.29168	8.91005
Gsk3a	NM_001031667	1	10.314	10.2433	10.4537	9.25931	8.7857	9.45687	9.43379	9.32728	9.12096	8.96115	8.53292	8.61247	9.5217	9.94776	9.83746	9.51647	9.97923	9.65413	8.96714	9.20959	8.67906	9.24256	9.54653	8.99	7.94911	9.02183	9.08052	8.67183	8.23507	9.16532	10.2571	9.75411	9.07927
Gsr	NM_010344	1	10.9461	11.0278	11.6292	8.52065	7.44719	8.64299	8.77589	8.90079	8.16198	8.42082	8.05986	7.53324	9.55568	8.09616	8.49333	7.55617	8.22472	8.61101	7.88104	8.56257	8.4666	8.04529	9.59764	8.64881	8.59423	8.55837	8.28815	7.82933	9.25614	8.48275	9.78405	9.26579	8.29195
Gtse1	NM_001168672	1	9.02187	8.63687	8.56753	6.51136	6.41912	6.21727	6.13465	6.56015	6.32966	6.6856	6.58936	6.34582	6.95367	6.15995	6.44698	6.07202	6.53848	6.83937	6.91233	6.64279	6.43159	6.21719	6.69957	6.78445	5.73874	6.25378	6.19769	5.98432	5.88401	6.38917	7.30136	7.30977	6.20842
Gyg	NM_013755	1	9.36694	9.88483	10.3136	7.67346	7.5189	7.91378	7.86014	7.98612	8.31297	7.99726	8.08597	7.45403	7.96841	8.07331	8.18	7.95809	8.31829	6.0966	7.95738	8.08269	7.55972	7.30777	6.9561	7.26435	7.86748	7.47401	7.47084	7.45685	8.02542	7.61039	7.95687	7.93679	7.6841
H13	NM_010376	1	12.3345	12.029	12.0012	10.6264	9.9809	10.3872	10.5879	10.7893	10.6748	10.4268	9.74431	10.0624	10.8243	10.8815	11.1207	10.6598	10.9091	10.0298	10.2246	10.6092	11.002	10.7136	10.8587	10.1131	10.2314	10.4962	10.342	10.7201	9.84451	11.5173	11.5904	11.0855	11.9877
H2afv	NM_029938	1	11.977	11.5263	11.3845	9.8612	9.8293	9.88687	9.8684	10.3472	10.2517	9.6943	10.1842	9.96335	10.4816	10.3837	10.5788	9.41059	10.6965	9.44113	9.59968	10.1106	9.91373	9.75369	10.5632	10.8005	10.8858	10.1969	10.5861	9.94109	9.61801	10.743	11.4963	10.8444	9.90689
H2afy	NM_001159515	1	12.5531	12.41	12.3155	10.1271	9.871	10.7097	9.78251	9.96563	9.75	9.9151	10.0793	9.43714	10.6201	10.5039	10.7182	10.82	10.5276	10.8583	9.99632	10.5691	10.2076	10.2636	11.3303	10.6433	10.2953	10.1162	10.1474	9.80224	10.2317	10.5119	10.9317	10.775	10.2708
H2afz	NM_016750	1	12.9412	13.207	13.0873	10.7059	10.5504	10.6063	10.4345	10.625	10.654	10.9742	11.1042	10.5004	11.1819	9.62525	10.0008	9.63092	9.82379	10.2855	10.7762	11.1653	10.4276	10.6173	10.7917	10.9833	11.1567	10.8739	11.0601	10.2851	11.3527	9.85465	10.288	10.2594	9.2871
H3f3a	NM_008210	1	12.3856	12.9753	13.0283	10.9477	10.3812	10.5854	10.6469	11.0189	11.1094	10.9173	10.7916	10.4366	11.045	10.7363	10.9815	10.753	10.8386	10.264	10.7352	10.6862	10.4414	10.1985	9.82377	10.6403	9.95833	10.744	10.4317	10.0717	11.0478	10.2567	10.7233	10.4496	9.73511
Haao	NM_025325	1	9.48865	9.20198	9.18694	5.64386	5.72697	6.05024	5.64386	5.64386	5.70987	5.64386	5.67858	5.64386	5.69894	6.07045	6.69762	6.99708	6.49334	5.64386	5.64386	6.53596	5.82281	6.26883	5.82635	6.13091	5.64386	6.10417	5.71699	5.72675	6.18269	6.13525	6.22054	6.28283	6.92887
Hal	NM_010401	1	7.77822	7.92886	7.9633	5.64386	5.64386	5.75668	5.64386	5.64386	5.64386	5.73102	5.77802	5.64386	5.69894	5.76291	5.81268	5.97629	5.64386	5.64386	5.64386	6.00596	5.73612	5.79239	5.90961	5.64386	5.64386	5.64386	5.71699	5.68591	5.70775	5.64386	5.69738	5.64386	6.20842
Hdac5	NM_001284248	1	10.912	9.92287	10.4194	8.18082	7.99184	8.3331	8.8726	8.2438	8.6224	8.06593	7.20417	8.17562	8.32426	9.11166	8.91423	9.33542	8.9312	8.13135	7.71506	8.35826	8.20126	8.31462	8.36544	7.67198	8.02637	8.32467	8.60952	8.58006	7.85249	8.33949	8.3734	8.29773	8.49711
Hgsnat	NM_029884	1	9.76648	9.67297	10.0753	7.42529	7.23645	7.4433	7.39394	7.9099	7.91154	7.42157	7.4451	7.31152	7.81478	7.70827	7.81939	8.12362	7.96846	7.242	7.74409	7.53538	6.97657	7.00694	7.58184	7.97032	7.34126	6.92376	7.31468	7.24818	7.73476	7.5852	7.85455	7.45429	6.20842
Hirip3	NM_172746	1	8.56742	8.5531	8.37888	6.96902	6.77204	6.87166	6.79159	6.67514	6.17467	7.10001	6.91477	6.72893	7.18351	6.89256	7.4947	7.04505	7.48276	6.58616	6.77845	7.41995	6.85839	7.00694	6.9561	6.54696	6.50438	6.92376	7.31468	6.44238	6.39163	8.03918	8.1988	7.9531	7.50549
Hist1h2aa	NM_175658	1	7.94346	7.67514	7.53629	6.00762	6.2608	6.29405	5.91001	5.97838	5.74176	6.03494	6.19271	5.82265	6.15801	5.64386	5.86485	5.64386	5.72421	5.64386	6.02112	6.53596	5.9046	6.21719	7.10484	6.59768	5.99084	6.45261	6.24791	6.05018	6.13701	5.73828	5.98256	5.79629	5.95359
Hist2h2ab	NM_178213	1	8.47224	8.74465	7.84671	6.74627	7.20781	6.56586	7.07061	6.81545	6.43099	6.64129	7.20417	6.99451	6.37652	6.24422	6.1006	6.47362	6.18804	5.64386	6.59944	6.83531	6.81675	6.54496	6.652	7.32583	7.5649	6.62732	6.87773	6.44238	6.79608	6.06413	6.51699	6.33355	6.20842
Hist2h2ac	NM_175662	1	9.21649	9.24933	8.78591	7.31594	7.81321	7.12385	7.33481	7.47469	6.71436	7.52275	7.6339	7.48092	7.39846	6.6669	6.91109	7.09148	6.92593	6.71832	7.38734	7.83484	7.28219	7.67612	7.93971	7.98944	8.31515	6.57139	7.68648	7.19093	7.40932	7.63514	7.31854	7.14915	7.18774
Hist3h2a	NM_178218	1	9.79429	9.70728	9.22481	7.02966	7.755	7.40919	6.79159	7.00324	6.32966	7.36818	7.56131	7.04943	6.83572	7.13256	7.69526	7.13646	7.88353	6.95104	6.53447	7.83484	6.97657	7.55657	7.30263	7.69546	7.45741	7.20672	7.79179	6.77012	7.15809	8.19713	8.44557	8.56513	7.76574
Hlcs	NM_139145	1	8.5766	8.33216	8.42841	6.67214	6.1447	6.6265	6.26707	6.59951	6.63163	6.28586	6.45557	6.70632	6.65249	6.78414	6.66857	7.30353	7.08654	5.64386	6.31992	6.53596	6.43159	6.50246	6.55189	6.26251	5.82774	6.68114	6.0917	6.60462	6.39163	6.70192	6.73746	6.93591	6.42494
Hmgb2	NM_008252	1	12.4804	12.5523	12.4914	9.03121	8.81449	8.42132	8.69591	9.19864	8.58771	8.80921	8.71123	8.15072	9.82696	7.76642	8.37243	7.74227	8.54537	8.97036	9.12992	9.43444	8.6674	8.28984	9.32937	8.97088	9.49096	8.70849	8.49982	7.87548	8.32948	8.3693	9.64792	9.17135	7.6841
Hmmr	NM_013552	1	8.67391	9.02673	8.81102	7.45507	7.4715	6.82066	6.65323	7.00324	6.63163	7.28422	7.21604	6.61218	7.51049	6.32384	7.00705	6.07202	7.02442	6.95104	7.65521	7.92227	6.89887	7.12372	7.27149	7.06243	6.33251	6.92376	6.84548	6.68973	6.60798	7.14268	7.40153	7.81713	7.18774
Hnrnpd	NM_001077265	1	10.3439	10.5411	10.3989	9.28026	9.12139	9.2508	9.26984	9.40709	9.43088	9.03152	8.67729	8.7896	9.39815	9.62525	9.70425	9.66968	9.87749	8.35086	9.0274	9.15648	8.48	8.22596	9.29106	8.59988	8.34562	8.99019	8.43627	8.45798	8.65529	9.65732	10.1266	9.6529	9.31449
Hnrnpf	NM_001166430	1	10.5112	10.8015	10.7773	9.37288	8.66445	9.03847	9.49583	9.57937	9.22338	9.24646	8.97842	8.38228	9.78621	8.88107	8.59719	8.61175	8.70239	8.67747	9.01555	8.96386	8.7582	8.25185	8.97075	8.52322	9.00064	8.82067	8.59019	8.43966	8.94762	8.33949	8.90972	8.52205	8.23576
Hnrnpl	NM_177301	1	9.82158	9.3016	9.79599	8.11705	8.00855	8.62824	8.73073	8.89289	8.01959	8.04907	7.76087	7.59607	9.50248	8.75748	8.91423	8.35055	8.48899	8.54134	7.91972	7.92227	7.896	7.71387	9.27545	7.98944	7.34126	7.87138	8.06821	7.59566	7.73476	8.11153	9.47478	8.72566	8.23576
Hnrnpm	NM_029804	1	11.5942	11.415	11.4589	9.98119	9.49185	9.66993	10.1429	9.98805	9.71427	9.95185	9.33203	9.26219	10.229	10.0566	10.3532	10.1637	10.1306	10.8796	10.0467	10.2939	9.96705	9.71698	10.9598	10.0822	9.3553	9.99921	9.90686	9.40919	9.80489	10.0468	10.6162	10.3046	9.87044
Hopx	NM_001159901	1	10.7891	11.1558	11.4628	9.55235	9.33513	9.73679	9.30107	9.83981	10.1199	9.49081	9.5726	9.51725	10.0151	9.49372	9.5335	8.51287	9.97923	7.6254	8.91704	9.1921	9.00993	8.46608	9.68886	9.73665	10.2067	9.51971	9.62275	8.71816	8.78683	9.35607	10.277	10.1785	8.5897
Hp	NM_017370	1	13.7064	13.5227	13.8261	6.08585	6.2608	6.00527	6.87696	5.85372	5.94729	6.03494	5.71249	5.78	6.5363	6.15995	6.37688	6.60745	6.13023	5.64386	5.97292	6.92271	6.37533	7.06651	6.83352	7.82885	6.60854	7.27833	8.58042	5.95021	7.13504	5.73828	5.98256	6.47581	5.64386
Hpcal1	NM_016677	1	10.0163	10.3433	10.2088	9.15431	9.23222	9.10391	9.48907	9.68377	9.09957	8.98794	8.97842	9.04516	9.45126	10.2827	10.3691	10.0682	10.138	8.80184	8.8783	8.66752	8.26458	8.71904	8.43736	8.4833	7.98825	8.83261	8.60952	8.58006	9.19615	9.0504	9.24692	9.34209	8.83638
Hpse	NM_152803	1	10.3222	10.3245	10.4051	7.74754	7.63103	7.493	7.60883	7.22077	7.45312	7.28422	7.45515	7.50731	7.67064	8.43779	8.13823	7.93282	7.98486	6.83937	7.42367	7.78904	7.25126	7.67612	7.65605	6.59768	6.44933	8.27302	7.2422	7.78165	8.65529	7.39541	7.85455	7.88672	6.77963
Hsd11b1	NM_008288	1	8.09171	8.50931	8.88384	6.12344	5.88005	6.36695	6.32896	5.85372	5.83345	5.89098	6.21655	6.45833	6.95367	7.17611	6.3032	5.87376	6.13023	5.64386	6.06779	6.15779	7.01391	6.77664	6.32805	6.54696	7.07647	7.13137	7.19178	7.3432	6.04107	6.95882	6.78768	6.52028	6.77963
Ibtk	NM_001081282	1	9.29089	9.22923	9.3797	8.9603	8.54358	8.00796	8.63595	8.49403	8.43995	8.81919	8.48957	8.18383	8.95324	8.07331	8.16967	8.29211	8.21084	6.44069	8.37421	7.92227	8.27999	7.69512	7.42088	7.98944	7.14737	8.1826	7.93661	7.82933	7.78005	8.0016	8.41394	8.37241	8.0527
Idh1	NM_010497	1	9.7092	10.6204	10.7629	9.57964	8.86122	8.90408	9.16342	9.79813	9.54603	9.4335	8.70703	9.04966	9.7377	8.89417	8.80501	8.80523	9.30228	7.69121	9.57162	8.56257	8.63181	8.10333	7.91976	7.80745	7.42924	8.78424	8.18881	8.0466	8.50156	8.60055	9.0705	8.95354	7.76574
Ier2	NM_010499	1	11.6904	11.665	11.3782	11.1872	10.2747	11.2378	11.9734	11.4873	10.7145	10.6529	10.541	11.9321	11.7401	12.3509	12.7612	12.4489	11.6581	12.4696	11.1649	9.44923	10.1955	10.8278	11.1495	10.8273	10.5388	10.4621	10.7691	10.1545	11.2343	10.7113	11.865	11.2364	10.8872
Ifi205	NM_172648	1	9.38795	9.59133	9.99264	6.04728	6.73236	6.43635	6.06359	6.14725	6.12716	6.54834	6.06727	6.22379	6.37652	6.47099	6.22554	6.54209	6.13023	6.83937	6.43119	7.92227	8.20126	7.51441	6.99475	6.94979	5.99084	7.44318	6.84548	7.30324	8.65529	6.91905	5.98256	6.28283	7.0641
Ifi211	NM_001033450	1	9.69663	10.3054	10.4794	6.42371	6.77204	6.36695	6.74693	6.09312	6.22068	6.6856	6.01389	6.22379	6.37652	7.33826	7.3918	7.18007	7.33706	7.05469	6.69172	7.69287	8.32525	7.87248	7.55623	7.23259	6.39209	7.91696	7.21721	7.56219	9.0123	7.65948	6.78768	7.28421	6.42494
Ifitm6	NM_001033632	1	10.8145	10.8809	10.3375	5.69466	5.88005	5.70135	5.73815	5.71727	5.67723	5.64386	5.67858	5.73601	5.64386	6.07045	6.14345	6.54209	6.24363	5.88792	5.70418	7.15704	6.12536	6.66545	6.4443	6.78445	6.20537	6.87838	5.71699	5.8428	7.60656	6.74805	6.57534	6.28283	5.95359
Ifngr1	NM_010511	1	10.6762	10.8916	11.0794	9.39992	9.45576	9.8332	9.56821	9.71546	9.96292	9.43998	8.78878	8.92303	9.7145	10.7216	10.4481	10.7992	10.4471	10.2089	9.50111	9.32639	9.02829	9.18325	10.4179	9.09966	8.34562	9.61959	9.2441	9.20747	9.21825	9.83342	10.1556	9.96184	9.07927
Ift57	NM_028680	1	7.8252	7.84327	7.95206	6.12344	5.72697	6.05024	5.98884	6.14725	6.12716	5.64386	6.09324	6.09047	6.15801	6.5393	6.3032	6.60745	6.34875	5.88792	6.24068	6.53596	6.48575	6.77664	6.74561	6.13091	7.24757	6.68114	6.67241	6.66893	6.43002	6.95882	6.35987	6.47581	6.42494
Il17ra	NM_008359	1	12.6682	12.2244	12.5382	7.81798	7.85075	7.6326	7.96135	7.4957	7.77173	7.92517	7.32965	7.53324	7.73794	9.16668	8.9569	9.90883	9.10632	8.91635	7.81419	8.41964	8.0656	8.10333	8.8704	7.8707	7.37118	8.32467	7.93661	7.94638	8.71869	8.07581	8.26234	8.0624	8.63385
Impa2	NM_053261	1	8.81246	8.78192	8.99758	7.95976	7.71485	8.09637	7.94167	7.92547	7.68413	7.72738	7.86254	7.85435	8.01257	7.41298	7.8585	6.99708	7.79328	7.87235	7.51069	6.92271	7.12045	6.66545	7.33311	7.32583	7.14737	7.20672	7.19178	6.80868	6.76638	7.36613	8.24447	7.68665	7.76574
Inf2	NM_198411	1	9.82158	9.40677	9.73169	7.8294	7.73507	7.85163	7.94167	7.76165	7.24626	7.6173	7.98553	7.73657	8.06593	7.97808	7.96985	7.30353	8.15395	7.6254	7.05812	7.83484	7.72644	7.75065	7.13975	7.46895	8.25222	7.72529	8.14972	7.91137	7.4842	7.86178	7.85455	7.64709	8.0527
Ing3	NM_023626	1	8.92456	8.93041	8.88384	7.16194	6.88492	6.8965	7.72852	7.14299	7.01778	7.31275	6.94362	6.75118	7.06269	7.84947	7.95789	8.21033	7.33706	6.95104	7.3118	7.64225	7.8137	7.80413	7.47655	7.20013	7.14737	7.44318	7.02899	7.06913	7.68801	8.11153	7.62518	7.70603	7.30162
Inpp5f	NM_178641	1	8.65669	8.45264	9.21543	6.23063	5.88005	6.50255	6.38833	6.56015	6.74616	6.39666	6.19271	6.431	6.59556	7.21839	7.20211	7.71287	7.05581	6.95104	6.06779	6.92271	6.43159	6.9762	6.32805	6.91019	6.13734	6.68114	6.67241	6.28714	6.70509	6.91905	7.19372	7.33488	6.42494
Ints6l	NM_172779	1	8.52061	9.41272	9.38389	7.63496	7.1183	7.35645	7.98076	8.0009	8.31297	8.03201	7.40418	7.76966	7.43136	7.84947	7.81939	8.44297	8.65192	6.0966	7.74409	7.78904	8.31032	7.87248	7.39221	7.41339	6.79671	7.61897	7.44954	7.76213	7.37037	8.23001	7.53983	8.03201	7.98614
Iqgap3	NM_001033484	1	8.5766	8.7634	8.53775	7.10673	7.23645	7.10266	6.65323	7.00324	6.52566	6.59556	6.77733	6.83693	7.49501	7.25947	7.55943	6.94746	7.52824	7.05469	6.91233	7.08309	6.63699	7.44876	7.06907	7.82885	6.92332	7.01042	6.55764	6.60462	7.3505	7.4241	8.18949	8.23241	6.92887
Irak3	NM_028679	1	8.28332	8.59559	8.63236	6.29791	6.1447	6.29405	6.20238	6.14725	6.05279	6.34232	6.28575	6.25527	6.34232	7.13256	7.13998	7.62091	7.02442	5.64386	6.11299	6.74225	6.68408	6.41349	6.13393	6.59768	7.18155	6.62732	6.47572	6.5601	6.46741	7.27457	6.60366	7.28421	6.61316
Itpr1	NM_010585	1	8.54888	8.58508	8.91891	7.12537	7.08718	6.8965	6.87696	7.00324	6.56186	6.449	6.53353	7.06728	7.36478	7.13256	6.93568	6.72991	7.36239	5.88792	6.53447	7.15704	7.37119	7.28287	6.60281	6.54696	6.33251	7.20672	7.38368	7.23408	6.26993	7.30574	7.15597	7.09137	8.11634
Kcnk12	NM_199251	1	8.29449	8.21439	7.66582	5.64386	5.64386	5.64386	5.64386	5.64386	5.64386	5.64386	5.64386	5.64386	5.64386	5.64386	5.64386	5.64386	5.72421	5.64386	5.64386	5.64386	5.64386	5.64386	5.64386	5.8251	5.73874	5.64386	5.64386	5.68591	5.64386	5.64386	5.69738	5.72208	5.95359
Kctd20	NM_025888	1	8.94597	9.18816	9.18214	6.77017	6.51576	6.87166	6.70084	6.81545	6.66529	6.99827	6.26305	6.68336	6.81093	6.94386	6.86062	7.13646	7.25829	6.58616	6.86026	6.74225	6.81675	6.58625	6.74561	6.78445	6.84016	7.20672	6.47572	6.46671	6.96246	6.79274	7.13672	7.09137	5.95359
Kdm7a	NM_001033430	1	10.4895	10.9583	10.8624	9.18129	9.18156	8.44676	9.42673	9.31551	9.29502	9.32561	8.54709	9.14099	8.74653	9.76016	9.45061	10.8972	9.78217	10.055	9.2612	9.24394	9.0732	9.02708	9.02777	9.08196	8.28403	8.62855	9.05254	8.93416	9.3442	9.67534	9.66817	9.84869	9.65166
Kif15	NM_010620	1	8.62164	8.75406	8.30126	6.62051	7.26455	6.29405	6.06359	6.14725	6.32966	6.39666	6.58936	6.12497	6.65249	5.76291	6.44698	5.97629	6.44674	6.27888	6.53447	7.64225	7.12045	6.10804	7.10484	6.6467	7.3107	6.38933	6.14568	5.98432	6.31165	6.60502	6.85988	7.23169	6.77963
Kif20a	NM_009004	1	9.08112	9.02673	8.9921	6.83954	6.60635	6.29405	6.20238	6.81545	6.07801	6.54834	6.6254	6.31625	6.90764	6.39929	6.88607	5.76339	6.70614	6.44069	6.50087	7.29448	6.63699	6.45866	6.652	6.91019	6.13734	6.32315	6.24791	6.23145	6.5741	6.65429	7.13672	7.2047	6.20842
Kif22	NM_145588	1	10.7265	10.1749	10.2182	7.62189	7.42247	7.26405	7.14133	7.87825	7.16622	7.64	7.5236	7.32642	8.17682	6.39929	6.66857	6.47362	6.58225	7.69121	7.21147	8.76535	7.50833	7.55657	8.28976	7.80745	6.88234	7.59112	7.55303	6.97052	6.53941	6.83609	7.83079	7.45429	6.92887
Kif4	NM_008446	1	9.01513	8.73517	8.21922	7.04931	6.60635	6.53454	6.70084	6.71152	6.73035	7.34073	6.82462	6.45833	7.25877	6.32384	7.05273	5.87376	6.85633	6.58616	6.98706	7.64225	6.58831	6.6264	6.652	6.43981	7.00193	6.45261	6.67241	6.17353	6.64108	7.21014	7.49518	7.38384	6.77963
Kifc1	NM_001195298	1	8.55818	8.33216	8.25626	6.26465	6.77204	6.59649	6.06359	6.2984	6.32966	6.49953	6.28575	6.34582	6.56624	6.5393	6.98365	6.78745	6.82022	6.58616	6.35797	7.00512	6.31678	6.54496	7.39221	6.32405	5.99084	6.73304	6.03562	6.08202	5.99059	6.60502	7.49518	7.23169	6.20842
Klf10	NM_013692	1	8.91735	9.58607	9.59017	8.9128	8.43654	8.12817	9.05768	8.98493	8.19116	8.19418	7.99245	9.06306	8.34167	8.84103	8.8183	9.11716	8.51181	6.95104	8.96714	7.69287	8.01126	7.80413	7.5036	7.84992	7.64057	7.91696	8.12306	7.84797	8.28828	8.0016	8.60813	8.47764	7.18774
Klf13	NM_021366	1	12.8381	13.0902	13.2054	10.2867	9.83399	10.2421	10.4658	10.4368	10.6136	10.1507	9.96434	10.1778	10.2591	10.8381	10.8388	11.272	10.8896	9.42188	10.2038	10.2691	10.4311	10.4001	10.3072	10.0507	10.4575	9.94523	10.3187	9.97963	10.0152	10.72	10.9852	10.9335	10.6061
Klrb1f	NR_024262	1	7.95758	8.45264	7.32591	5.74376	5.64386	5.75668	5.64386	5.64386	5.67723	5.89098	5.64386	5.64386	5.64386	5.64386	5.64386	5.76339	5.64386	5.64386	5.76208	5.64386	6.05546	5.86129	5.64386	5.73731	5.64386	5.74841	5.853	5.8428	5.64386	5.91037	5.64386	5.86686	6.20842
Kmt5a	NM_001310723	1	11.5436	11.4617	11.396	10.8807	10.8035	11.4911	10.671	10.6696	10.8229	10.5488	10.6696	10.3242	11.0155	10.3508	10.4923	9.72227	10.7717	10.2312	10.717	9.76523	9.67823	9.41861	10.5307	10.0231	9.57693	9.78852	9.67875	9.31855	9.47388	9.87038	10.5061	10.2725	9.2871
Lactb	NM_030717	1	9.13183	9.45373	9.47312	7.85196	7.81321	7.74627	7.47832	7.9099	7.61691	7.82966	7.60711	7.13656	7.97958	7.55172	7.59074	8.14579	7.36239	7.242	7.74409	7.74176	7.74875	7.67612	7.67997	7.20013	7.03969	7.50419	7.53292	7.08494	7.82395	7.10773	7.24854	7.14915	6.92887
Lamtor1	NM_025605	1	10.7162	10.5025	10.3675	9.41136	8.67495	9.07156	9.4125	9.55955	9.26788	9.14696	8.97144	8.68364	9.78938	9.93514	9.91372	9.56663	10.0472	8.46814	9.05082	9.06339	8.83322	8.64281	8.64599	8.56206	8.55566	9.04255	8.52039	8.33784	8.68734	9.38555	9.82069	9.32339	8.75874
Lamtor4	NM_001081108	1	11.5897	11.4603	11.522	9.98374	9.74708	10.0507	10.0631	10.039	9.87214	9.23904	9.85662	9.74505	10.1839	10.7435	10.829	10.4486	10.9986	10.1162	9.63497	9.64186	9.49233	9.66974	9.87646	9.64917	9.60868	9.54896	9.70145	9.48854	9.73762	10.3457	10.4873	10.3546	10.1843
Lbp	NM_008489	1	8.68244	8.74465	8.52263	6.594	6.51576	7.03716	6.87696	6.59951	6.73035	6.449	6.43541	6.63629	6.50573	6.94386	6.91109	6.54209	6.74517	5.64386	6.80623	6.42058	6.48575	6.84627	6.55189	6.54696	7.66493	6.83155	6.94014	6.66893	5.64386	6.44624	7.21223	6.8339	7.30162
Lbr	NM_133815	1	10.0464	10.9001	10.8473	8.35678	8.41164	8.52052	7.86014	8.11392	8.30231	8.25426	8.6986	8.16737	8.43387	7.95326	8.15927	8.21033	8.31829	7.242	7.94493	8.32656	8.43942	7.63736	7.79393	8.49673	7.98825	8.78424	8.67522	8.27725	8.52835	8.7998	8.96533	9.19212	8.23576
Lcn2	NM_008491	1	9.93657	9.5541	9.81784	6.74627	6.1447	6.33095	6.55304	6.81545	7.0436	6.22711	6.3518	6.01888	7.18351	6.24422	6.18507	6.78745	5.72421	5.88792	6.28084	7.41995	7.58475	7.00694	6.79024	7.69546	9.02908	8.08613	7.70457	7.05315	6.98841	6.2678	6.97274	6.72413	7.18774
Ldhb	NM_001316322	1	8.14205	7.91214	7.53629	6.51136	6.08296	6.50255	6.44535	6.81545	6.35051	6.59556	7.09269	6.34582	6.65249	7.04129	6.98365	7.38034	6.92593	6.58616	6.35797	6.53596	5.98201	6.36686	5.90961	6.13091	5.82774	6.45261	6.38886	6.23145	7.40932	5.91037	6.35987	6.23026	5.95359
Ldlrad3	NM_001290784	1	8.10446	8.34467	8.9866	7.34804	6.88492	6.96854	7.1064	7.11609	7.45312	6.77034	6.84004	6.28609	6.97615	7.04129	6.80831	6.60745	7.43581	6.0966	6.56732	6.29515	6.05546	6.36686	6.26621	5.90783	5.73874	6.18092	6.51726	6.25957	6.93603	6.06413	6.02505	6.23026	5.64386
Lgals1	NM_008495	1	13.6332	13.4457	12.9552	9.15884	10.51	10.2566	10.1978	9.22404	7.93242	8.57012	9.19181	9.86472	9.89931	12.1403	11.814	11.9125	11.8782	9.27937	9.82353	10.9377	9.96705	9.99124	9.54001	9.60645	10.3376	10.1548	9.87526	10.3486	9.80123	10.8579	10.4701	10.0742	11.2413
Lilra6	NM_011090	1	10.4895	10.6833	10.8457	5.79121	5.64386	5.80993	5.64386	5.71727	5.64386	5.64386	5.64386	5.69067	5.64386	6.5393	6.4808	7.30353	6.95952	5.64386	5.87135	6.00596	6.25575	5.92704	5.98832	5.8251	5.82774	5.84592	6.14568	5.80516	6.22697	6.06413	5.8936	6.05998	5.95359
Lims1	NM_001193303	1	11.0186	11.4016	11.539	9.62619	9.08248	9.0103	9.44081	9.54954	9.12701	9.47196	9.22449	9.01328	9.43917	9.18811	9.43775	9.59913	9.58109	8.35086	9.52221	9.56243	9.59445	9.46362	8.57124	8.70774	8.90159	9.52708	9.33982	9.15605	9.78281	9.80097	9.18737	9.46093	9.04698
Lmnb1	NM_010721	1	10.83	10.0695	10.0225	7.29962	7.05538	7.26405	6.99624	7.0887	6.89546	7.39512	7.31869	6.89806	8.02341	8.09616	8.16967	8.97581	8.10976	8.83133	7.52748	7.78904	7.95478	7.49285	8.90125	7.82885	7.00193	7.91696	7.36105	6.9361	7.73476	8.0016	8.74788	8.59663	7.76574
Lmnb2	NM_010722	1	9.61877	8.9551	8.83571	8.24189	7.54203	8.4882	8.17868	8.29264	7.97331	8.28339	7.57059	7.83364	8.52052	8.05008	8.16967	7.55617	8.29217	7.48402	8.02988	7.83484	7.65733	7.47098	8.27414	7.44143	7.18155	7.53375	7.51252	6.95342	6.88166	7.73011	8.59409	8.27196	7.18774
Lmo1	NM_001302206	1	8.44243	8.80021	8.23786	5.88171	5.64386	5.80993	5.73815	5.85372	5.94729	5.73102	5.8097	5.90436	5.99148	6.32384	6.14345	6.66998	6.18804	5.64386	5.81775	5.83623	5.64386	6.16364	5.64386	5.73731	5.99084	5.74841	5.71699	5.76649	5.76893	5.82688	5.98256	5.86686	5.64386
Lmo4	NM_010723	1	11.8775	12.28	12.2984	10.3395	10.4562	10.5987	10.438	10.5466	10.4639	10.36	10.4722	10.2322	10.3175	11.3034	10.8534	11.5733	11.5129	10.1748	10.101	10.3813	10.3012	10.1851	10.2917	10.3161	9.94347	10.3166	10.7497	10.4079	10.4175	11.0403	11.0726	11.1328	10.9232
LOC100038947	NM_001173459	1	8.59478	8.99533	9.44533	5.92491	6.01843	5.70135	6.06359	5.71727	5.94729	6.59556	5.84069	5.73601	5.752	6.15995	6.18507	6.60745	6.34875	5.88792	6.24068	6.83531	6.68408	6.58625	6.06296	6.69409	5.82774	6.38933	5.7866	6.08202	7.3099	6.13525	5.79883	6.42993	5.95359
Lrmp	NM_008511	1	10.1515	9.71694	10.0984	8.27566	8.19523	8.76938	8.70761	8.28059	9.18328	8.38095	7.47504	8.20817	8.07637	9.23004	9.39405	9.59108	8.94803	6.95104	7.82781	8.50709	8.16852	8.15912	8.98041	8.32671	6.92332	7.77565	8.16287	7.92898	9.20171	8.73257	8.77926	8.77237	8.54415
Lrrc8d	NM_001122768	1	9.06817	9.2757	9.16276	7.26641	7.67355	7.12385	7.07061	7.14299	7.13052	7.44754	6.91477	7.10234	7.61444	8.24675	8.31735	8.91257	8.00108	6.44069	7.03482	7.64225	7.28219	7.37998	6.9561	7.52245	6.79671	7.44318	7.49183	7.55085	7.42841	7.96302	8.1988	7.98518	7.91635
Lrrfip1	NM_001111311	1	10.0397	10.2299	10.3136	9.18574	9.21072	8.78941	9.30107	9.26133	9.42352	9.35335	8.95737	8.85272	9.09348	9.05446	9.27382	10.0682	9.00543	9.25782	9.86706	8.50709	8.70212	8.82632	7.77185	8.37113	6.50438	8.66907	8.48942	8.17762	9.05591	8.68595	8.18949	8.59663	8.39818
Lrrk2	NM_025730	1	7.94346	8.22796	8.31009	6.74627	6.56177	6.56586	7.20875	7.16938	7.09391	6.6856	6.45557	6.95671	6.70726	6.72671	6.63893	6.07202	6.89154	6.0966	6.88653	6.64279	6.68408	6.21719	5.82635	6.1982	5.9116	6.62732	6.59692	5.95021	6.46741	6.50114	6.18351	6.28283	6.42494
Lrwd1	NM_027891	1	9.1928	9.06504	9.27981	6.88401	7.14876	6.56586	6.55304	6.9124	6.83758	7.16406	6.41496	6.75118	6.81093	6.99339	7.3918	7.30353	7.02442	6.27888	6.8335	7.58981	7.25126	7.00694	7.81568	6.73998	6.50438	6.87838	7.16589	6.75043	6.82518	7.4241	7.5251	7.68665	7.40715
Lsm3	NM_026309	1	9.63204	9.62249	9.06698	8.31679	8.18057	7.40919	8.35271	8.31646	8.07699	8.36741	8.01979	7.84403	8.51286	7.41298	7.16099	7.09148	7.77454	8.03326	8.44662	8.35826	7.87586	7.8557	7.7035	7.91137	7.07647	8.35811	8.1759	7.40745	7.60656	8.03918	8.79776	8.61724	6.92887
Lsp1	NM_019391	1	13.8411	13.6803	13.9747	7.55471	8.15078	8.3331	7.70536	7.43171	6.99148	7.03299	6.74493	7.60831	7.97958	10.1741	9.88874	10.5725	9.97923	6.95104	8.04162	8.64199	9.08201	8.7557	8.6338	7.76369	8.0997	9.00082	8.84797	8.85344	8.3396	10.4116	9.87397	9.5969	10.9409
Ltb4r1	NM_008519	1	10.8395	10.6049	10.7994	5.83719	6.01843	6.13617	5.98884	6.09312	5.89149	6.03494	6.01389	5.73601	6.11815	7.55172	7.60614	8.23121	7.83006	6.27888	6.11299	6.42058	6.48575	6.74052	6.83352	6.54696	6.06596	6.87838	6.34339	6.17353	6.9091	7.03519	6.57534	6.93591	5.95359
Ltf	NM_008522	1	9.13183	8.10097	8.66716	5.69466	5.95089	5.70135	5.73815	5.78709	5.89149	5.64386	5.64386	5.82265	5.69894	6.07045	5.70235	5.64386	5.64386	5.64386	5.64386	5.64386	6.25575	6.10804	6.20159	5.90783	6.33251	5.84592	5.97728	5.91531	5.88401	5.73828	5.84699	5.64386	5.64386
Ly6c1	NM_001252055	1	12.0373	12.0425	11.3855	8.20731	8.52047	9.15627	8.58611	8.75155	9.0205	6.9627	9.91422	9.76159	9.52552	8.60647	9.4029	7.85421	8.31829	7.98159	8.00612	10.0439	10.7924	11.2597	10.1144	10.2738	11.8199	10.8119	11.191	10.4048	9.99292	9.68722	9.89989	9.75411	8.23576
Ly6c2	NM_001099217	1	14.5195	14.7082	14.3435	7.17989	7.29209	6.59649	7.20875	7.38743	7.26833	7.10001	7.66886	7.4404	7.75104	7.21839	7.44417	7.68287	7.75554	5.64386	6.72121	8.74151	10.4651	9.44691	8.6215	8.2011	10.2557	9.2348	8.86416	9.12963	8.38915	8.99411	8.21724	8.40834	9.77509
Maf1	NM_001164607	1	10.2637	10.1394	10.2415	8.52767	8.555	8.67923	8.73073	9.01435	9.03345	8.4468	7.99933	8.46541	8.91304	9.7885	9.67168	8.92544	9.37875	8.83133	8.17548	8.47852	8.45307	9.16292	9.03706	8.54923	8.52936	8.70849	9.03834	8.52899	8.6714	9.3411	9.81465	9.31079	9.23071
Map3k6	NM_016693	1	8.83559	8.63687	8.53021	7.26641	7.58722	7.71868	7.79583	7.0887	7.35339	6.39666	7.15569	7.41274	7.2027	7.2994	7.47805	7.5889	7.38728	5.64386	7.36882	7.15704	7.12045	7.37998	6.9561	8.0635	8.59423	7.31284	8.02567	7.16143	6.8537	6.83609	8.3232	7.83485	5.95359
Mapk14	NM_001168514	1	11.1147	10.8195	11.0651	8.52065	8.4851	8.94036	8.64814	8.33989	8.08323	8.09907	8.25658	8.25566	8.63795	9.66401	9.58494	9.72962	9.54283	8.22321	8.51558	8.41964	8.13503	8.97363	9.15265	8.80809	8.34562	8.75943	8.51014	8.4335	9.35422	9.31069	9.16853	9.04007	9.14176
Mapkapk3	NM_178907	1	10.659	10.4772	10.4969	9.28026	8.66445	9.36642	9.04851	9.37909	9.37857	8.63935	8.29626	8.74038	8.95324	9.33945	9.44633	9.25612	9.36628	7.98159	9.09091	8.29414	8.13503	8.06002	8.77371	7.97032	7.42924	7.89435	8.0112	7.72228	8.59744	8.50977	8.82807	8.52205	8.44849
Mboat7	NM_029934	1	10.7712	10.7365	10.8073	8.9603	8.25245	9.0661	8.97296	9.16624	8.78051	8.38095	8.44488	8.45188	9.37719	9.32016	9.13205	9.26627	9.59184	7.98159	8.73385	8.47852	8.49328	8.55195	8.09006	8.61227	7.66493	8.27302	8.43627	8.18497	8.36953	8.89511	9.54946	9.23943	7.91635
Mbp	NM_001025245	1	9.93657	10.0582	10.4112	8.54854	7.85075	8.47177	8.43946	8.15413	8.45927	8.55825	8.14304	8.21619	8.78523	8.30676	8.60488	9.15044	8.70239	7.928	8.17548	7.87922	8.01126	7.75065	8.6215	8.16791	7.27948	7.72529	8.20161	7.59566	8.37937	8.38398	8.68302	8.54375	8.11634
Mcemp1	NM_026985	1	11.1272	11.2302	11.4942	6.04728	5.95089	6.71293	5.73815	5.64386	5.80354	5.96475	5.8097	5.64386	5.69894	6.32384	5.96382	6.84278	6.34875	6.27888	5.81775	7.96408	5.82281	8.28984	8.12533	7.41339	6.06596	7.56272	6.43294	5.98432	9.10419	6.13525	6.25665	6.38255	5.95359
Metrnl	NM_144797	1	9.66685	9.71694	9.82402	8.85813	8.73642	8.8351	9.22983	9.37909	9.06531	8.73734	8.3074	8.51177	9.23066	9.67163	9.68986	10.2222	9.47478	10.0674	9.5957	7.96408	7.97385	7.96929	8.42326	8.0635	7.21493	8.16382	8.05417	8.09421	8.28828	8.32435	8.97077	8.65761	8.0527
Mfsd14b	NM_133680	1	9.84836	10.6127	10.621	8.25887	8.05754	8.26797	8.2604	8.57524	8.64788	8.19418	8.19194	8.04659	8.8167	8.45557	8.50159	8.38823	8.71227	7.40777	8.3649	8.29414	7.70377	7.82153	7.17383	7.29541	7.07647	8.14478	7.64959	7.81045	8.16852	8.26214	8.41394	8.57571	7.50549
Mfsd7a	NM_172883	1	9.15653	9.25597	9.53848	6.94824	7.1183	7.12385	7.1064	7.34175	7.44345	7.2551	7.06671	7.34117	7.16406	6.83937	6.95987	7.22241	7.02442	7.69121	6.91233	6.29515	6.19204	6.54496	6.74561	6.6467	5.9116	6.45261	6.59692	6.41765	7.20312	6.65429	7.21223	7.2047	7.30162
Mgat2	NM_146035	1	8.5766	9.75961	9.67469	7.86311	7.5189	7.37425	8.17868	8.18032	7.7166	8.32601	7.72809	7.10234	8.13748	8.28703	8.16967	8.49571	8.25207	6.83937	8.16479	8.616	8.36913	8.13149	7.58184	7.67198	7.14737	8.06604	8.03999	7.71214	8.24587	8.72106	8.48416	8.70654	8.39818
Mia2	NM_001165254	1	10.8009	11.1593	11.0897	9.49616	9.15179	9.34854	9.64323	9.58918	9.65686	9.33954	9.29053	8.84756	9.77343	9.64088	9.81444	9.81511	9.81005	8.97036	9.33936	9.37369	9.11675	9.10728	9.45941	9.12583	8.56863	8.89089	9.28676	8.85805	9.3442	9.53113	9.73369	9.73065	8.79808
Mki67	NM_001081117	1	11.6133	11.4972	11.1635	9.05571	9.36138	7.99651	8.05592	8.40797	8.43508	9.46562	9.1522	8.33884	9.1139	7.41298	8.02819	8.18913	8.53427	8.74099	9.23077	9.66739	8.72482	8.54149	8.82823	8.81882	7.82486	9.3964	8.46839	8.00569	8.59744	8.97484	8.8926	9.30445	8.67669
Mlkl	NM_001310613	1	8.35975	8.35708	7.8588	6.77017	6.56177	6.7678	7.27316	6.39103	6.90957	6.99827	6.55238	6.51145	7.12437	7.21839	7.26168	6.60745	7.08654	6.0966	7.08105	6.92271	7.12045	7.00694	7.8371	6.86949	6.06596	6.83155	6.90927	6.71026	7.15809	7.07192	7.03644	6.93591	6.77963
Mmp8	NM_008611	1	9.50797	10.623	10.9038	5.69466	5.72697	5.64386	5.64386	5.64386	5.64386	5.73102	5.64386	5.64386	5.64386	5.76291	5.81268	5.97629	5.64386	5.88792	5.76208	5.83623	5.98201	5.92704	5.82635	5.73731	5.99084	6.02312	5.7866	5.72675	6.04107	5.82688	5.64386	5.72208	5.95359
Mob3a	NM_172457	1	9.95076	10.1177	10.0491	8.10771	7.60929	7.90155	8.29182	8.0009	7.34303	7.90657	7.76087	7.64444	8.14741	8.6223	8.67228	9.02448	8.72209	8.22321	7.85468	8.44938	8.20126	8.72829	8.57124	8.31159	7.71247	7.93923	8.22687	8.31793	8.65529	8.38398	8.57276	8.4549	8.49711
Mocos	NM_026779	1	8.79683	8.71604	8.80479	6.56697	6.92065	6.59649	6.60401	6.56015	6.99148	6.81092	6.3518	6.28609	6.11815	7.17611	6.60866	6.84278	6.58225	6.44069	6.63086	6.92271	6.68408	7.55657	7.03239	6.49437	6.44933	6.96773	6.59692	6.88286	7.33034	6.99751	7.31854	7.03119	7.0641
Mocs1	NM_028464	1	8.28332	8.5531	8.66716	7.29962	7.54203	7.54105	7.07061	7.70864	7.53733	7.06689	6.45557	7.3987	7.60004	7.67829	7.68078	7.65222	7.50568	6.27888	6.96257	7.15704	7.31247	7.23175	7.39221	7.13293	7.00193	7.24296	7.29092	6.98743	7.62322	7.5069	7.97865	7.54317	7.40715
Morc3	NM_001045529	1	9.12559	9.5541	9.6883	7.46973	6.92065	6.71293	7.53195	7.31834	7.51904	7.72738	6.71177	6.97573	7.43136	8.24675	7.95789	8.16762	8.03298	7.40777	7.99409	7.78904	7.97385	8.08904	7.36297	7.20013	7.3107	7.34655	7.53292	7.24818	8.35962	7.98244	7.9678	8.0624	8.11634
Mpo	NM_010824	1	9.37748	9.5541	7.89448	5.64386	5.64386	5.64386	5.64386	5.64386	5.64386	5.64386	5.64386	5.64386	5.64386	5.64386	5.64386	5.76339	5.64386	5.64386	5.64386	5.64386	5.64386	5.64386	5.64386	5.64386	5.64386	5.64386	5.64386	5.64386	5.64386	5.64386	5.64386	5.64386	5.64386
Mrpl33	NM_025796	1	12.1774	12.1417	11.7799	10.3275	10.5815	10.0727	10.298	10.2361	10.1662	10.3078	10.1082	10.653	9.91394	9.73853	10.1369	9.95978	10.2909	9.36252	10.0583	10.1291	9.70701	9.67454	9.31417	9.84035	9.51796	9.91747	10.1341	9.68274	9.34922	9.75089	10.4816	10.3361	9.56309
Mrps30	NM_021556	1	8.76506	9.35205	9.2617	8.58939	8.04139	8.08561	8.48096	8.40797	8.65627	8.66171	8.47976	8.14233	8.60227	8.41978	8.55018	8.00736	8.23846	6.44069	8.45543	8.66752	8.48	7.83871	6.99475	8.85054	8.00744	8.39078	8.12306	8.14785	7.75002	8.26214	8.92663	8.90405	7.30162
Ms4a4c	NM_029499	1	10.314	10.9149	11.0079	5.83719	6.46826	6.13617	6.32896	5.71727	5.94729	6.49953	6.04083	5.69067	5.90041	7.08764	7.3918	8.52982	8.01711	5.88792	6.24068	6.29515	7.01391	7.06651	6.79024	6.26251	5.82774	6.57139	6.19769	6.36685	7.20312	7.4241	6.42479	7.49942	6.77963
Msantd3	NM_001145924	1	7.8252	8.08615	8.17154	6.16005	6.31553	6.09383	6.20238	6.0369	6.26527	6.16585	5.92989	6.15866	6.44256	6.07045	6.1006	5.87376	6.13023	5.64386	6.24068	5.83623	5.98201	5.72003	6.06296	5.73731	5.64386	6.25378	6.63516	6.23145	5.88401	5.9893	6.10645	6.23026	5.64386
Msrb1	NM_013759	1	12.7047	12.622	12.9577	9.46357	9.68608	9.73679	9.44781	9.87633	9.4978	9.55194	9.85852	9.39181	9.71783	10.3837	10.638	10.5643	10.7285	9.99108	9.49686	9.76523	9.20009	9.90413	10.4321	9.7423	9.41398	9.60574	9.31648	9.23958	11.0151	9.83876	10.2187	9.91681	9.81399
Mtfr2	NM_027930	1	8.10446	8.40565	7.66582	5.83719	5.88005	5.9109	5.91001	5.78709	5.80354	5.96475	5.87106	5.82265	6.1968	5.87288	5.86485	6.07202	6.18804	5.88792	5.76208	6.00596	5.73612	5.79239	5.90961	5.90783	5.73874	5.93723	5.64386	5.91531	5.88401	5.9893	6.48691	6.28283	5.95359
Mthfd1l	NM_172308	1	8.10446	8.00964	8.31009	6.77017	6.1447	6.68469	6.60401	6.88081	6.83758	6.85039	6.55238	6.5373	6.83572	6.32384	6.41236	6.16179	6.39857	6.27888	6.39505	6.15779	6.31678	6.10804	5.98832	5.98609	5.9116	5.74841	6.51726	6.05018	6.04107	6.50114	6.88317	6.86871	6.20842
Mthfd2	NM_008638	1	9.46413	9.29517	9.21072	7.33208	6.92065	6.84639	7.30431	6.67514	6.15111	7.49811	7.06671	6.25527	7.29498	7.25947	7.57517	7.79933	7.23105	6.83937	7.08105	8.66752	7.37119	7.33224	8.1078	7.20013	7.14737	7.75069	7.19178	7.10056	7.24679	7.81921	8.23545	8.36023	7.50549
Mtmr3	NM_028860	1	9.86344	9.60699	9.80539	8.09831	7.99184	8.07477	8.21193	8.04432	8.33928	8.01474	7.60711	7.87477	8.22453	8.68395	8.62769	9.02448	8.68241	7.48402	8.16479	7.53538	8.0656	8.36293	8.57124	8.16791	7.73565	8.20114	8.06821	7.94638	7.80946	8.62547	8.49931	8.4434	8.11634
Mtpn	NM_008098	1	10.793	11.2436	11.2703	10.2167	9.88011	9.80724	9.90443	9.99913	10.0161	10.2971	9.9502	9.48441	9.76054	9.93514	10.1684	10.6789	10.6172	9.21371	10.3526	10.4711	10.0185	10.1442	9.96671	9.79759	9.21383	10.2289	9.69241	9.79985	10.9306	10.59	10.3971	10.4781	9.95988
Mum1	NM_023431	1	9.36694	8.9551	8.9866	7.17989	6.88492	7.61773	7.07061	6.9124	7.08149	7.2551	6.77733	6.83693	7.44754	7.82232	8.08426	7.48839	7.43581	7.81446	6.91233	7.47883	7.68073	7.20549	7.8371	7.59915	7.45741	7.82431	7.61174	7.27598	6.26993	7.4241	7.86628	7.7992	7.98614
Mx1	NM_010846	1	8.98786	9.51035	9.52337	6.12344	5.95089	6.21727	6.26707	5.85372	5.83345	6.449	5.77802	5.86409	6.27139	6.94386	6.95987	7.34245	6.85633	5.88792	6.63086	6.42058	6.43159	6.21719	6.60281	6.06031	5.64386	6.92376	5.853	6.62637	7.28917	7.33625	6.57534	7.12055	5.95359
Mxd3	NM_016662	1	9.65389	9.70243	9.46128	6.36217	6.81066	6.09383	5.91001	6.59951	6.17467	6.28586	6.55238	6.5373	7.08355	6.5393	6.88607	6.40175	7.05581	5.88792	6.02112	6.92271	6.31678	6.45866	6.69957	6.69409	6.20537	6.25378	6.0917	6.05018	6.18269	6.70192	7.46464	7.56456	6.20842
Myadm	NM_001093765	1	10.1668	10.9295	10.9023	9.55579	9.04248	9.35751	9.26193	9.48271	8.94371	9.53387	9.2736	9.08514	9.65305	10.5082	10.4524	10.3229	10.4441	8.64462	9.045	8.96386	8.50644	9.0494	8.09006	8.54923	7.92913	9.16095	9.37414	8.84883	8.77941	10.0742	9.91126	9.89164	9.56309
Myh9	NM_022410	1	11.8475	11.66	11.7297	10.6587	10.3651	11.4706	10.659	10.4094	10.4458	10.2351	9.99739	10.2381	10.8998	10.98	10.9104	11.1997	10.9701	10.6001	10.3336	10.3021	10.1995	10.335	11.1322	9.60645	9.42115	10.308	10.2278	10.3088	10.1564	10.974	10.8631	10.8875	10.4169
Naa60	NM_029090	1	10.9514	10.8527	11.2243	8.97579	8.19523	9.24113	8.71922	8.91646	8.62668	8.57012	8.51861	8.22418	9.14894	9.55275	9.70067	9.20424	9.57569	7.69121	8.74107	8.98433	8.61976	8.94217	9.22758	8.78638	7.84632	8.58685	8.53057	8.6666	8.98032	9.11342	9.29547	8.91242	8.79808
Naaa	NM_025972	1	11.7716	12.2057	12.2574	7.8294	7.83211	7.47662	8.12734	8.21874	7.99994	7.80978	7.25107	7.18642	8.06593	9.916	9.57714	10.1139	9.54283	7.75415	7.74409	9.08249	8.39765	8.15912	8.95123	8.02694	6.79671	8.025	7.21721	7.26215	8.35962	8.86403	8.87529	8.91242	9.01394
Nadk	NM_001159637	1	11.7124	11.7696	11.9249	10.2124	9.68608	10.0727	10.1211	10.5592	9.94419	10.3736	9.50648	9.3668	10.3842	10.7471	10.5067	10.6088	10.6865	9.34218	10.101	9.80027	9.52503	9.67454	9.68295	9.23401	8.61939	9.91747	9.67875	9.47362	9.89684	10.162	10.5303	10.279	9.63002
Naga	NM_008669	1	9.55518	9.74553	9.44933	8.8013	8.05754	8.47177	8.68412	9.12638	8.79578	8.29774	7.99933	8.06447	9.14894	9.14492	9.47598	8.70428	8.97291	8.03326	8.25829	7.00512	7.50833	7.23175	7.93971	7.59915	7.42924	7.09218	7.53292	7.08494	7.60656	8.46905	8.66298	8.04728	7.98614
Naip2	NM_010872	1	10.2175	9.9145	9.9733	8.58939	8.75633	8.71457	8.57338	8.68907	9.0205	8.60515	8.25082	8.563	8.62378	9.14492	9.14792	8.83282	9.12124	7.98159	8.91704	8.32656	7.896	8.08904	8.36544	7.97032	6.84016	8.30766	7.49183	8.01396	8.86597	8.50977	8.86363	8.67738	7.98614
Nap1l1	NM_001146707	1	11.4617	11.4473	11.1561	9.29268	8.79536	8.43833	9.30107	9.35629	8.82214	9.10678	8.74029	8.55037	9.48691	9.48509	9.25928	9.35458	9.24215	8.46814	9.13541	9.99434	9.29414	9.25542	9.12679	9.21789	8.64411	9.43608	9.33402	8.85805	9.30343	9.43572	9.37153	9.30445	9.07927
Napsa	NM_008437	1	13.3769	13.1503	13.2806	6.08585	6.69158	6.96854	6.06359	6.4352	6.28705	6.22711	5.74564	6.09047	5.99148	8.74307	8.53417	9.33542	8.71227	6.0966	6.28084	8.22704	7.15428	8.46608	8.0355	7.35561	7.4005	7.93923	6.90927	6.66893	8.7031	9.0504	8.16119	8.34794	9.36776
Nat8l	NM_001001985	1	9.15039	8.79109	9.43728	5.64386	5.80552	5.64386	5.82665	5.78709	5.74176	5.73102	5.67858	5.82265	5.69894	6.07045	5.96382	6.07202	5.94146	5.64386	5.70418	6.15779	5.64386	6.26883	6.20159	6.38308	5.64386	6.45261	5.853	5.64386	6.53941	5.82688	5.8936	5.93414	5.64386
Nbeal2	NM_183276	1	9.64519	9.52142	9.59741	8.62912	8.34744	8.76264	8.73073	8.86086	8.78434	8.72678	8.05326	8.43823	8.85359	8.68395	8.89554	8.21033	9.08366	8.70958	8.4901	8.12015	8.0296	8.10333	7.95938	7.64811	7.27948	7.75069	8.21429	7.81045	6.8537	8.23001	8.41394	8.31045	8.11634
Ncor2	NM_001253904	1	10.0298	9.59657	9.77381	7.49862	7.1183	7.40919	7.83903	7.81277	7.51904	7.42157	7.20417	7.37023	8.07637	8.86784	8.32668	8.65875	8.25207	7.87235	7.36882	8.12015	7.58475	7.69512	7.89954	7.91137	7.51216	7.16953	7.88994	7.24818	7.52023	8.19713	8.05241	8.00096	7.59756
Ndufaf7	NM_028611	1	8.56742	8.87111	9.24337	8.24189	7.755	7.77334	8.03749	8.14086	8.08945	7.92517	7.93615	7.90486	8.06593	7.55172	7.8713	7.62091	8.03298	6.95104	8.05326	7.47883	7.12045	7.30777	7.30263	6.82759	6.39209	7.59112	7.49183	7.11602	6.98841	7.4241	8.18949	7.70603	6.92887
Necap2	NM_025383	1	11.2727	11.2183	11.4717	9.49258	9.39353	9.55373	9.631	9.67919	9.73621	9.3738	9.11147	9.08514	9.67726	10.3364	10.3417	10.6048	10.3491	9.81038	9.61547	9.13834	9.41768	9.40136	10.0834	9.01821	8.44745	9.29646	9.0666	9.00646	9.63865	9.60816	9.81465	9.60725	9.07927
Nectin1	NM_021424	1	8.55818	7.91214	8.28343	6.69727	6.08296	6.79448	6.83491	6.67514	6.24315	6.77034	6.01389	6.63629	7.25877	6.78414	7.13998	7.04505	6.95952	6.58616	6.35797	6.64279	7.25126	6.70347	7.55623	7.26435	6.20537	7.44318	7.21721	6.46671	6.9091	7.07192	7.7944	7.40771	6.77963
Neil3	NM_146208	1	8.81246	9.16718	8.91891	6.62051	6.56177	6.09383	6.38833	6.81545	6.7926	6.7286	6.26305	6.31625	6.62431	6.07045	6.41236	6.66998	6.70614	6.0966	6.39505	7.08309	6.48575	6.50246	6.69957	6.78445	6.88234	6.87838	6.34339	5.95021	6.35219	6.83609	7.13672	7.00011	6.77963
Nemp2	NM_001142647	1	7.69637	7.87812	7.88269	5.79121	6.46826	5.86131	5.98884	5.85372	6.15111	6.39666	5.95843	6.22379	6.11815	6.39929	6.60866	6.89607	6.18804	5.88792	6.06779	6.64279	6.25575	6.41349	7.06907	5.90783	6.44933	6.57139	6.67241	6.46671	6.26993	6.50114	6.73746	6.76166	6.92887
Nfe2	NM_001302341	1	11.2107	11.1235	11.2452	5.74376	5.80552	5.75668	5.64386	5.78709	5.74176	5.73102	5.64386	5.64386	5.8032	5.87288	5.96382	6.07202	6.07002	5.64386	5.70418	5.64386	5.64386	5.98993	5.98832	5.64386	5.64386	6.02312	6.29644	5.68591	5.82762	5.64386	5.79883	5.72208	5.64386
Nfkb1	NM_008689	1	10.5836	10.5219	10.815	8.25887	7.69435	8.18975	8.42536	8.28059	8.22541	8.20943	7.37271	7.71409	8.58775	9.23004	9.1843	9.50794	8.89694	7.75415	8.15402	7.96408	8.5324	8.35101	8.6338	7.71856	8.11746	8.52931	8.51014	8.06265	7.98732	9.03188	9.03975	8.8701	7.91635
Ngp	NM_008694	1	9.82543	9.89762	10.0518	5.64386	6.20393	5.64386	5.64386	5.71727	5.67723	5.64386	5.64386	5.78	5.64386	6.07045	5.64386	5.87376	5.64386	5.88792	5.64386	5.64386	5.73612	5.64386	6.13393	5.73731	5.64386	6.68114	5.64386	5.87951	5.93829	5.82688	5.79883	5.64386	5.64386
Nhsl2	NM_001163610	1	9.56904	9.47664	9.8962	5.88171	5.72697	6.09383	5.82665	6.0369	6.00101	5.89098	6.47546	6.48514	6.1968	6.6669	6.69762	7.13646	6.89154	5.64386	5.92303	6.83531	7.15428	6.84627	6.99475	6.38308	6.50438	7.09218	7.36105	6.97052	6.46741	6.87816	6.76279	6.9027	7.0641
Nkiras2	NM_028024	1	10.5537	10.2698	10.5104	9.57626	9.49778	9.53408	9.33918	9.7639	9.87933	9.24646	8.78082	9.24661	9.53312	9.5023	9.4885	9.25612	9.70507	8.54134	9.31054	8.56257	8.16852	8.76472	8.80667	8.1846	7.96882	8.60088	8.46839	8.52321	8.22419	8.78881	9.317	9.22607	8.29195
Nmral1	NM_001290762	1	8.63928	8.281	8.42027	6.51136	6.60635	6.92091	6.65323	6.5197	6.35051	6.64129	6.72845	6.5373	7.36478	7.08764	7.47805	7.45326	7.36239	6.27888	6.24068	7.35858	6.77386	6.77664	7.20712	6.73998	6.75193	6.68114	6.77872	6.73049	7.11162	7.4241	7.43343	7.49942	7.0641
Nono	NM_023144	1	9.66685	10.1784	10.1608	9.01631	8.92421	8.96992	9.0668	9.33896	9.0716	9.10678	8.89228	8.98539	9.49471	8.5579	8.50159	8.40671	8.64161	8.39102	8.99759	9.1744	9.08201	8.81768	7.89954	8.92195	8.31515	8.9469	8.83981	8.71816	8.77941	8.19713	8.94887	8.54375	8.0527
Nop9	NM_026403	1	8.85835	8.77269	8.68765	7.69858	7.29209	7.69055	7.86014	7.65361	7.52822	7.36818	7.55198	7.15338	7.68436	7.79464	7.65138	7.5889	7.83006	6.58616	7.45911	7.96408	7.60935	7.82153	8.09006	7.62384	6.60854	7.64629	7.75753	7.23408	7.86656	7.70694	8.42984	8.21898	7.50549
Npc2	NM_023409	1	13.343	13.204	13.4446	11.5222	11.4209	11.7592	11.8639	11.8718	11.6143	11.5842	10.8585	11.22	11.971	13.2687	13.2096	13.0834	12.9893	11.2399	11.3355	11.0776	11.0589	11.421	12.2961	10.9446	10.4078	11.0581	10.9005	11.0877	11.8478	12.051	12.1469	11.9325	11.7425
Nrm	NM_134122	1	9.82543	9.86759	9.39224	7.31594	7.17859	6.79448	7.14133	7.45336	6.96469	6.8888	7.51402	7.15338	7.62869	7.9023	7.60614	7.62091	8.12464	6.27888	6.88653	7.53538	6.93825	6.58625	6.74561	7.57403	7.51216	6.96773	7.49183	6.71026	6.8537	7.70694	8.31466	7.86964	6.77963
Nsf	NM_008740	1	9.67968	9.75493	9.74152	8.18971	7.86916	7.87681	8.2604	8.18032	8.52033	8.0826	8.00618	7.81263	8.58043	8.02648	8.32668	8.03137	8.34395	8.17801	8.50714	8.616	8.31032	7.73238	8.67007	7.76369	6.96315	8.04566	7.85796	7.57344	7.86656	8.12906	8.0829	8.09216	7.30162
Nsmce4a	NM_001162855	1	10.8716	10.7763	10.6439	9.57287	9.04248	9.02727	9.70291	9.94286	9.86673	9.42044	9.06629	9.02246	9.84234	9.06608	9.03295	8.73385	8.88825	8.46814	9.30081	9.65468	9.20009	8.99678	8.90125	9.00887	8.99104	9.22577	9.3456	8.96863	8.65529	9.27176	9.66481	9.13607	9.23071
Nudt21	NM_026623	1	8.53952	8.87111	9.01929	7.39488	6.95553	7.33844	7.53195	7.67219	7.51904	7.54697	7.42478	6.7947	7.99066	7.08764	7.4947	6.72991	7.55045	6.83937	7.40562	7.78904	7.05031	6.9127	6.99475	7.54847	7.37118	7.72529	7.16589	6.5601	7.11162	6.83609	7.59729	7.17719	6.92887
Nup107	NM_134010	1	8.54888	8.1729	8.22856	6.64657	6.01843	6.21727	6.60401	6.59951	6.57962	6.54834	6.79327	6.48514	6.62431	6.47099	6.63893	6.47362	6.89154	6.0966	6.46645	6.83531	6.89887	6.50246	7.13975	6.73998	6.33251	7.05187	6.74415	6.23145	6.22697	6.74805	7.5251	7.12055	6.61316
Nup210	NM_018815	1	10.8697	10.4368	10.1993	7.00973	7.05538	7.03716	7.17543	7.1953	6.83758	7.06689	6.99963	6.61218	7.49501	7.37611	7.13998	6.78745	7.52824	6.27888	6.93766	8.41964	7.8137	7.25754	8.28976	7.29541	6.92332	7.44318	7.33805	7.00414	7.03896	8.18041	8.22637	8.07736	7.76574
Nup62	NM_053074	1	9.48865	9.52692	9.4292	8.17188	7.77467	7.88924	7.81759	8.21874	7.93242	7.74843	7.67747	7.7913	8.40931	8.52459	8.1276	8.07823	8.23846	6.95104	7.86792	8.47852	7.74875	7.9217	8.36544	7.38479	7.3107	7.96115	7.59243	7.33001	7.42841	8.05761	8.80996	8.23241	7.50549
Nxt1	NM_019761	1	9.13183	9.2757	9.33279	7.90687	7.26455	7.42634	7.53195	7.43171	7.36368	7.90657	7.8165	7.34117	8.03416	7.48403	8.01671	8.05499	7.88353	7.55644	7.56049	7.83484	7.68073	6.9448	7.72664	7.71856	7.37118	7.72529	7.8417	7.14645	7.5897	7.65948	8.23545	8.00096	7.30162
Oas3	NM_145226	1	8.27206	7.67514	8.3276	5.64386	6.2608	5.70135	5.64386	5.71727	5.67723	5.81322	5.64386	5.69067	5.85262	7.13256	7.09701	6.94746	7.20328	6.0966	5.92303	6.29515	6.37533	5.86129	5.98832	5.8251	5.73874	6.18092	5.7866	6.11316	6.08984	6.91905	6.48691	7.00011	5.95359
Obfc1	NM_175360	1	8.43235	8.64701	8.7474	6.62051	6.73236	7.20562	6.83491	7.06077	6.46961	6.49953	6.94362	7.03136	7.16406	7.64767	7.37392	6.99708	7.31128	6.95104	6.98706	6.29515	6.97657	6.77664	6.83352	6.86949	6.65794	6.87838	7.26677	7.00414	7.18078	7.03519	7.63892	7.47703	6.77963
Olfm1	NM_001038613	1	10.0397	10.0275	10.2159	6.04728	6.95553	7.05932	6.5002	6.59951	6.45042	6.85039	5.90077	6.05511	6.62431	8.45557	8.39921	9.32574	8.25207	7.40777	6.11299	6.53596	6.63699	6.9762	7.47655	6.06031	7.21493	6.68114	7.08532	7.10056	6.22697	6.99751	6.85988	7.14915	6.92887
Orai2	NM_178751	1	8.62164	8.45264	8.76679	7.0687	6.46826	7.20562	6.99624	7.14299	6.88121	6.85039	6.91477	6.70632	7.55595	7.41298	7.54351	7.48839	7.43581	6.71832	6.96257	7.22739	6.97657	6.45866	7.13975	6.94979	6.60854	6.73304	6.77872	6.66893	7.28917	7.47982	7.58314	7.33488	7.18774
Osbp	NM_001033174	1	9.06164	9.08008	9.31095	8.46319	8.0735	8.65031	8.45342	8.23133	8.58331	8.47232	7.94331	8.03756	8.8167	7.92801	8.47667	8.12362	8.34395	7.05469	8.58138	8.19228	7.8137	7.83871	8.22622	7.64811	6.65794	8.10595	7.75753	7.78165	7.42841	8.05761	8.54382	8.2589	7.84301
Ostf1	NM_017375	1	12.1031	12.2057	12.3518	10.15	9.97666	10.3268	10.3952	10.3843	10.2559	10.2536	9.84711	9.87235	10.4757	10.7828	10.8108	10.7275	10.7236	10.5209	10.3666	10.5349	10.3348	10.4513	10.8508	10.3236	10.0856	10.4032	9.91854	10.0836	10.8354	10.59	10.712	10.6177	9.94243
Otulin	NM_001013792	1	9.90047	9.91869	10.009	8.06006	7.755	7.6326	8.10981	8.46236	8.08323	8.20943	7.68604	7.78052	8.57308	8.81372	8.92655	9.0364	8.74152	8.77174	7.95738	8.44938	8.11798	8.19959	8.54544	8.16791	8.48898	8.16382	8.10954	7.79131	8.45578	8.78881	8.94334	8.74452	8.7183
Pacs2	NM_001081170	1	10.579	9.9103	10.2017	8.08884	7.65244	8.38667	8.32259	8.04432	7.91853	7.82966	7.41452	8.00087	8.28879	9.26071	9.22975	9.26627	9.23531	7.75415	7.82781	8.19228	7.83472	7.9536	8.80667	8.29632	7.11236	7.87138	8.13645	7.80091	7.75002	8.46905	8.8926	8.76315	8.5897
Padi2	NM_008812	1	9.98908	9.83249	9.91369	5.96687	6.1447	6.36695	6.06359	6.1994	5.97439	6.22711	6.85529	5.90436	6.34232	6.99339	6.78143	7.45326	6.62474	7.05469	6.11299	6.29515	6.43159	6.36686	6.4443	6.59768	5.9116	6.25378	6.67241	6.44238	6.08984	6.95882	6.35987	6.6053	7.0641
Padi4	NM_011061	1	9.09397	9.1097	9.4292	5.69466	5.64386	5.64386	5.64386	5.64386	5.70987	5.64386	5.64386	5.64386	5.85262	5.64386	5.86485	5.97629	5.72421	5.64386	5.64386	5.83623	6.05546	5.64386	5.73798	5.64386	5.73874	5.74841	5.64386	5.8428	5.70775	5.73828	5.79883	5.72208	5.64386
Pagr1a	NM_030240	1	10.0062	10.125	9.91948	8.60939	7.79407	8.91019	8.86217	8.73397	7.94618	8.8291	8.44488	8.58175	8.77885	8.95794	8.99835	8.76283	9.15062	8.46814	8.53231	9.04403	8.5324	8.70973	8.72856	8.57478	8.16948	8.78424	8.97266	8.59116	8.81611	9.16532	9.13012	9.12171	8.54415
Parvg	NM_001162500	1	9.64083	9.48797	9.68151	5.79121	6.1447	6.43635	6.06359	6.0369	5.83345	5.96475	5.8097	5.94357	5.752	7.21839	7.07504	7.65222	6.58225	6.0966	6.19936	7.35858	6.31678	7.12372	7.20712	6.32405	6.39209	6.92376	6.51726	6.31421	7.42841	7.21014	7.15597	6.9027	7.18774
Paxip1	NM_018878	1	9.14423	9.03447	8.98108	7.81798	7.37172	7.01465	7.72852	7.65361	7.7871	7.72738	7.35135	7.15338	7.97958	7.55172	7.8585	7.48839	7.57232	6.58616	7.45911	8.04422	7.896	7.28287	8.12533	7.91137	7.21493	7.69943	7.47084	7.11602	7.28917	7.88261	8.05241	8.10681	7.6841
Pcbp2	NM_011042	1	11.8728	12.1884	12.2493	10.673	10.3812	11.2654	10.9671	11.1205	10.8488	10.4462	10.5088	10.3572	11.433	11.0808	11.1018	10.82	10.8454	10.2423	10.457	10.4492	10.2156	10.1614	10.7243	10.685	10.2314	10.2778	10.2679	9.7161	10.3084	10.4713	10.9985	10.61	10.0924
Pclaf	NM_026515	1	10.7592	11.1162	10.7038	8.52767	8.08929	7.78668	7.68183	8.04432	7.2351	8.48492	8.32394	7.5587	8.98684	7.08764	7.65138	7.38034	8.56732	7.81446	8.12121	9.41949	8.41171	8.01537	8.50585	8.63673	7.71247	8.49965	9.08743	7.64977	8.07471	9.41443	9.79022	10.0055	8.67669
Pcna	NM_011045	1	10.866	11.5332	11.0494	9.82174	9.34831	8.91628	9.51593	9.68834	9.13605	9.60482	9.53519	9.3668	10.0178	9.13392	9.27863	9.33542	9.43355	9.19114	9.63884	10.0633	9.52503	9.16973	7.91976	9.57515	9.10228	9.75125	9.76318	9.0753	9.67506	9.23984	9.82971	9.60208	8.94552
Pgd	NM_001081274	1	11.8197	11.5973	11.8027	10.6619	10.4713	10.5029	10.7151	10.7808	10.4239	10.3324	10.053	9.91734	10.9245	11.0194	11.1247	10.5887	11.1168	10.4935	10.369	10.1654	9.86348	9.9523	10.6044	10.0044	9.12001	10.0965	9.953	9.39658	9.86567	10.1662	11.4376	10.8683	9.81399
Phf10	NM_024250	1	8.67391	8.94692	8.88384	7.52694	6.77204	7.57222	7.60883	7.55696	7.5464	7.44754	7.22781	7.31152	8.04483	7.58442	7.96985	7.41726	7.83006	6.44069	7.67041	7.47883	7.45502	7.59753	7.23967	7.49594	6.65794	7.47401	7.2422	6.97052	7.13504	8.07581	8.05241	7.47703	6.92887
Pi16	NM_023734	1	10.556	10.4162	10.7221	6.12344	6.01843	6.40206	6.32896	6.2984	5.83345	5.64386	6.28575	6.48514	6.15801	6.78414	6.8347	5.76339	6.34875	5.64386	5.97292	5.83623	5.82281	5.86129	6.06296	5.90783	5.64386	5.84592	5.853	5.76649	6.26993	5.73828	5.93878	5.79629	5.64386
Pif1	NM_172453	1	8.15436	8.00964	7.73306	5.92491	6.36826	6.13617	5.82665	6.09312	6.05279	6.16585	6.11877	5.86409	6.40992	6.15995	5.86485	6.07202	5.87261	6.0966	6.06779	6.42058	6.19204	5.92704	6.74561	6.13091	5.82774	6.18092	6.0917	6.14366	6.04107	6.13525	6.83621	6.52028	6.20842
Pira1	NM_011087	1	9.88577	10.077	10.287	5.88171	5.95089	6.09383	5.91001	5.85372	5.86277	6.03494	5.77802	5.69067	5.85262	5.64386	5.64386	6.24629	5.72421	6.44069	6.11299	6.64279	6.97657	7.33224	7.30263	7.16692	6.13734	7.41169	6.29644	6.58253	8.62252	6.2678	5.749	5.99842	5.64386
Pira11	NM_011088	1	8.8508	8.93041	8.9921	5.69466	5.80552	6.00527	5.64386	5.71727	5.64386	5.89098	5.71249	5.64386	5.69894	5.64386	5.64386	6.16179	5.64386	6.0966	5.87135	6.53596	6.48575	6.87987	6.87555	6.43981	6.06596	6.45261	6.0917	6.14366	7.76511	5.9893	5.69738	5.86686	5.64386
Pira2	NM_011089	1	9.86718	10.0733	10.2937	5.88171	5.95089	6.05024	5.91001	5.78709	5.89149	5.96475	5.77802	5.69067	5.90041	5.64386	5.70235	6.07202	5.72421	6.44069	6.15682	6.64279	7.05031	7.33224	7.36297	7.32583	6.06596	7.44318	6.24791	6.58253	8.75694	6.2678	5.69738	5.86686	5.64386
Pira4	NM_011091	1	8.88076	9.02673	9.07737	5.69466	5.88005	5.95887	5.64386	5.78709	5.64386	5.89098	5.71249	5.64386	5.69894	5.64386	5.70235	6.16179	5.64386	6.0966	5.92303	6.53596	6.63699	6.81188	6.87555	6.54696	5.99084	6.57139	6.03562	6.20277	7.89428	5.9893	5.69738	5.93414	5.64386
Pira6	NM_001289428	1	9.96131	10.0657	10.2621	5.69466	6.08296	6.09383	5.73815	5.78709	5.67723	5.89098	5.67858	5.73601	5.69894	5.97506	5.64386	6.16179	5.72421	6.27888	5.92303	6.83531	6.31678	7.06651	7.17383	6.49437	5.82774	6.68114	6.29644	6.08202	7.68801	5.82688	5.79883	5.86686	5.64386
Pira7	NM_011094	1	8.88076	9.01894	9.09281	5.69466	5.88005	5.95887	5.64386	5.78709	5.67723	5.89098	5.71249	5.64386	5.69894	5.64386	5.70235	6.16179	5.64386	6.0966	5.92303	6.53596	6.63699	6.81188	6.87555	6.54696	5.99084	6.57139	6.03562	6.20277	7.89428	5.9893	5.69738	5.93414	5.64386
Pitpna	NM_008850	1	12.0096	12.2463	12.3582	10.3113	10.3715	10.2152	10.5032	10.3815	10.2914	10.1586	10.2318	10.0172	10.584	10.8244	10.9486	11.0549	10.9112	10.3982	10.4874	10.3263	10.2974	10.359	10.3965	10.2181	9.53788	10.3749	10.3099	10.2885	10.2479	10.6428	11.1088	10.8357	10.3121
Pkm	NM_011099	1	13.4515	13.0635	13.0233	12.0011	12.1252	11.5033	12.2383	12.0965	12.3197	11.6416	12.0204	11.6885	12.0631	12.21	12.068	11.9366	12.1136	12.0789	11.8954	11.6059	10.8885	11.14	11.0405	10.8484	10.6001	11.0683	11.0407	10.622	11.4411	11.4369	11.46	11.3805	11.3445
Pkn1	NM_001199593	1	10.6438	10.039	10.4133	8.69923	8.59978	9.04958	8.99222	9.01435	9.19197	8.50978	8.6159	8.06447	8.86567	9.87033	9.66801	10.0624	9.59718	9.42188	8.6366	9.20959	8.7582	8.86877	9.25171	9.07302	8.34562	8.30766	8.48942	8.33784	9.15663	9.62061	9.45549	9.53865	9.14176
Plcb1	NM_001145830	1	8.52061	8.08615	8.42027	6.23063	6.1447	6.29405	6.5002	6.24975	6.15111	6.54834	6.45557	6.66002	6.27139	5.76291	6.14345	5.76339	6.07002	5.64386	6.15682	7.00512	7.25126	6.74052	6.26621	6.59768	7.68889	6.92376	6.87773	6.60462	6.88166	6.65429	6.81215	6.6856	6.61316
Plekhf2	NM_175175	1	8.59478	9.26915	9.15297	8.10771	7.97495	7.79991	8.17868	7.87825	8.57448	8.01474	7.72809	7.85435	8.10725	8.07331	7.75174	7.95809	8.06418	7.55644	8.14316	7.15704	7.63354	7.23175	7.5036	6.98832	6.84016	7.75069	7.61174	7.53944	7.52023	7.68341	7.83079	7.92029	7.0641
Plekhg3	NM_153804	1	8.98786	8.5531	8.68085	7.19761	7.05538	7.14473	6.87696	7.29457	7.18955	6.449	6.64309	7.10234	7.67064	7.97808	8.39034	8.29211	8.30529	7.81446	6.8335	6.92271	6.43159	7.00694	7.79393	6.82759	5.99084	6.92376	7.13953	7.03701	6.50386	8.02051	7.69264	7.81713	7.91635
Plk4	NM_173169	1	8.23775	8.65707	8.10202	6.69727	6.95553	6.68469	6.70084	6.47807	6.28705	6.85039	6.26305	6.19158	6.70726	6.39929	6.7261	6.24629	6.85633	6.0966	6.80623	6.64279	6.48575	6.45866	6.83352	6.78445	6.88234	7.01042	6.51726	6.51415	6.70509	7.14268	7.17498	7.49942	5.64386
Plod3	NM_011962	1	10.8223	10.6882	11.0794	7.78319	7.71485	7.9379	7.79583	7.67219	7.52822	7.49811	7.48489	7.49418	8.33299	9.43218	9.26414	9.30619	9.06063	8.35086	7.36882	8.08269	7.93545	8.3865	8.46515	7.32583	6.79671	8.04566	7.68648	8.00569	8.43706	8.70945	8.80387	8.72566	8.54415
Plppr3	NR_033210	1	9.34561	8.73517	8.66027	5.92491	5.80552	5.86131	5.64386	5.97838	5.97439	5.73102	5.74564	5.98172	6.11815	7.04129	6.14345	6.89607	6.18804	6.71832	5.76208	6.92271	6.31678	6.74052	6.55189	6.6467	6.92332	7.41169	7.2422	6.90083	5.88401	7.03519	6.63142	6.86871	6.20842
Plxnb2	NM_001284506	1	11.4704	10.5971	11.285	10.5491	9.95096	10.9151	10.4965	10.4368	10.6329	10.1268	10.0179	10.2538	10.505	11.22	11.1708	11.0867	11.2702	10.6914	10.1343	9.46388	8.98194	9.54963	9.83978	9.21789	8.64411	9.38833	9.2747	9.20747	9.39845	9.41443	10.3394	10.063	8.75874
Pnkp	NM_021549	1	10.5136	10.3711	10.6526	8.07931	7.99184	8.20971	8.12734	8.33989	8.04538	7.64	8.02655	7.87477	8.28879	8.26703	7.96985	8.56315	8.25207	8.03326	8.27827	7.83484	8.08328	8.08904	8.6215	8.04534	7.61578	8.04566	8.0959	7.82933	8.17982	7.79745	8.16119	7.96923	7.50549
Pnp	NM_013632	1	11.2756	11.5111	11.6528	9.55922	9.38716	9.33042	9.51593	9.51908	9.05265	9.62203	9.11465	9.3266	9.79255	9.89008	9.85369	9.90234	9.71984	9.86843	9.60364	9.78869	9.71836	9.58571	9.56591	9.82978	9.44948	9.81284	9.36848	9.20023	10.1128	9.38555	9.91409	9.68255	9.04698
Polb	NM_011130	1	9.71337	9.47095	9.75128	8.31679	7.88734	8.00796	8.29182	7.98612	7.65929	8.38095	8.19194	7.75871	8.34167	8.78587	8.65757	8.83282	8.88825	7.75415	8.37421	8.44938	8.15187	8.32685	8.6215	8.1846	7.21493	7.91696	7.85796	7.96358	8.26723	8.58792	8.52174	8.38449	8.0527
Pold1	NM_011131	1	9.89681	9.48797	9.17248	7.78319	7.39732	7.35645	7.92172	7.45336	7.32208	7.84927	7.5236	7.8949	7.83951	7.84947	7.77918	8.07823	7.86592	7.98159	7.51069	8.87899	8.15187	8.03041	8.49241	8.44226	7.96882	7.91696	8.59989	7.35628	7.40932	8.11153	8.95986	8.54375	7.84301
Ppp2r5a	NM_144880	1	12.1314	11.9493	12.1001	9.56947	9.1889	9.8332	9.61866	9.72439	9.70418	9.33954	8.88857	9.05861	9.74754	10.0272	10.0993	9.89581	9.83288	9.04777	9.25113	9.58939	9.42463	9.40713	10.2242	9.36425	9.10228	9.29646	9.37414	9.32522	8.7942	10.1491	10.0845	9.93335	10.2567
Ppp4c	NM_019674	1	10.3492	10.1784	10.331	8.65501	8.26641	8.67923	9.02999	9.26745	8.46406	8.23947	8.16769	8.30162	9.44724	8.94541	9.08335	8.71914	9.06063	9.44113	8.41088	8.04422	8.42563	8.15912	9.05546	8.29632	8.73897	8.35811	8.41445	7.91137	8.29869	8.64997	9.32977	8.80867	8.5897
Pqlc3	NM_172574	1	9.2513	10.125	10.2135	7.90687	7.44719	7.73253	8.17868	8.16729	8.43995	7.96167	7.703	7.60831	8.09703	8.05008	8.18	7.93282	8.23846	7.32727	7.85468	8.12015	8.39765	7.83871	7.20712	7.41339	7.3107	7.69943	7.33805	8.38965	7.68801	8.81071	8.5365	8.20543	8.63385
Pram1	NM_001002842	1	9.54118	9.71212	9.7284	5.83719	5.80552	6.36695	5.82665	5.85372	5.86277	6.16585	5.8097	5.86409	5.8032	6.83937	6.18507	6.89607	6.07002	5.64386	5.87135	6.92271	6.77386	7.30777	7.55623	7.46895	5.99084	6.45261	6.99998	6.41765	7.76511	7.5852	6.81215	6.86871	6.77963
Prdx4	NM_016764	1	10.4451	10.6484	10.3547	8.91816	8.37346	8.82866	8.48096	9.03603	8.9195	8.71613	9.16144	8.72921	9.40645	9.01902	9.3398	8.42495	9.07602	8.03326	8.71198	9.60269	9.4857	9.10728	8.22622	8.84004	9.04773	9.2348	8.95009	9.68014	8.7031	9.51121	9.32127	8.95354	9.2871
Prdx5	NM_012021	1	13.2199	13.1128	13.0044	11.2341	11.4131	10.9805	11.5367	11.5261	10.9315	11.0818	11.105	11.1102	11.11	11.7113	11.4649	11.5754	11.4916	10.9485	11.2759	11.6924	11.0409	11.4281	11.4394	11.335	11.1481	11.0376	10.8628	10.7563	12.2329	11.403	11.2055	11.2095	10.8595
Prkar2b	NM_011158	1	7.91479	8.29396	8.22856	5.92491	5.72697	5.80993	6.26707	6.0369	6.30852	5.96475	6.16848	6.31625	6.27139	6.32384	6.44698	6.84278	6.92593	5.64386	6.02112	6.74225	6.19204	6.0502	5.90961	6.1982	6.65794	6.45261	6.70873	6.44238	6.22697	6.99751	6.60366	6.76166	6.92887
Prkx	NM_016979	1	9.94013	10.062	10.057	8.30865	7.81321	7.83887	8.03749	8.20605	7.98668	8.04907	7.85497	8.07333	8.15728	8.28703	8.3634	9.15044	8.789	8.4301	8.26831	8.12015	8.04771	7.93774	7.81568	8.24949	8.20315	8.14478	8.12306	8.24245	8.74937	8.82153	7.71876	8.62744	7.76574
Prr11	NM_175563	1	7.74604	8.14456	7.73306	6.36217	6.36826	6.05024	5.98884	6.0369	6.15111	6.54834	6.16848	6.09047	6.59556	5.64386	6.34051	5.87376	6.24363	5.64386	6.69172	6.42058	6.25575	5.79239	6.60281	6.32405	6.06596	5.84592	5.97728	6.01763	5.99059	6.55401	6.78768	6.42993	6.20842
Prr14	NM_145589	1	9.5223	9.18816	9.56456	8.04055	7.29209	7.91378	7.81759	7.9099	7.7166	7.74843	7.32965	7.35577	8.09703	8.34543	8.7506	8.64325	8.04866	7.40777	7.78656	7.29448	7.45502	7.49285	8.38011	6.86949	7.71247	8.1826	7.44954	7.16143	7.42841	8.35447	8.42191	8.29773	7.98614
Prtn3	NM_011178	1	11.7894	11.476	10.7271	5.64386	6.08296	5.75668	5.64386	5.71727	5.70987	5.73102	5.67858	5.64386	5.752	5.97506	5.91519	5.76339	5.72421	5.64386	5.64386	5.64386	5.9046	5.79239	5.90961	5.90783	5.99084	5.93723	5.97728	5.76649	5.76893	5.91037	5.749	5.86686	5.64386
Psat1	NM_177420	1	8.82021	9.28222	8.86598	6.3304	6.77204	6.33095	6.13465	6.56015	6.3913	6.28586	6.43541	5.86409	6.97615	6.24422	6.63893	6.84278	6.70614	6.0966	6.56732	7.47883	6.63699	6.26883	6.38735	6.1982	6.13734	6.68114	6.77872	6.62637	6.50386	6.95882	7.46464	7.06159	6.77963
Psma7	NM_011969	1	13.0216	12.9458	12.7535	11.2533	11.1823	11.2305	11.2769	11.7172	11.0509	11.1085	11.0025	11.2496	11.5072	11.0577	11.2696	10.8541	11.207	10.055	11.1541	11.0487	11.1115	10.6346	10.808	10.8948	11.2722	11.0958	11.0966	10.7415	10.5432	11.0075	11.6236	11.3896	10.538
Psmc3ip	NM_008949	1	7.72967	7.96172	7.01615	6.08585	6.36826	5.86131	6.13465	6.47807	5.86277	6.16585	6.28575	5.98172	6.40992	6.15995	6.51385	6.78745	6.39857	5.64386	6.31992	6.42058	6.31678	6.6264	6.60281	6.1982	5.9116	6.68114	6.24791	6.20277	6.26993	6.79274	7.07739	6.8339	5.64386
Psmg4	NM_001101430	1	9.32397	9.62762	9.66783	8.03069	7.34567	8.14899	7.88096	8.18032	7.98668	8.0826	7.76895	7.92458	8.00166	9.12283	9.00998	8.83282	8.57817	6.95104	7.80044	8.32656	8.11798	8.22596	8.81749	8.04534	8.54257	8.025	8.13645	8.02219	8.14563	8.45521	8.5365	8.75387	8.29195
Ptgir	NM_008967	1	8.70772	8.1588	8.73434	6.00762	5.64386	5.9109	5.73815	5.97838	5.70987	5.64386	5.71249	5.86409	5.94666	6.47099	6.1006	6.47362	6.07002	5.64386	5.76208	5.83623	6.37533	6.26883	5.98832	5.73731	6.50438	6.25378	6.38886	6.53731	5.99059	6.20304	6.10645	5.93414	6.20842
Ptma	NM_008972	1	13.0889	13.2501	12.9651	11.2255	10.777	10.9272	11.2945	11.652	10.7985	11.1896	11.4541	10.6277	12.0406	11.7957	11.9873	11.101	11.8347	10.3883	10.9713	11.4491	11.28	10.8104	11.4927	11.8059	11.8253	11.3579	11.5424	10.7905	11.3185	11.5998	12.2242	11.8876	10.9053
Ptpn18	NM_011206	1	12.6666	12.6732	12.7372	10.5916	10.4562	10.6939	10.8373	10.477	10.5542	10.4235	10.0381	10.1654	10.4398	11.3373	11.2684	11.5085	11.1	10.9213	10.5108	10.7171	10.5246	10.7662	11.2882	10.6493	9.89794	10.1783	10.3099	10.6166	11.0993	10.7712	10.3685	10.4611	10.3523
Ptpro	NM_001164403	1	10.0197	10.5733	10.6852	6.45353	6.2608	6.79448	6.83491	6.9124	6.73035	7.2551	6.58936	7.03136	7.08355	8.50765	8.63522	9.0831	8.06418	6.95104	6.69172	6.92271	6.43159	7.17874	7.44898	6.73998	5.64386	6.87838	6.63516	7.14645	7.42841	7.65948	7.01552	7.81713	6.61316
Pxk	NM_145458	1	9.16872	9.26258	9.5004	8.68674	8.61076	8.41273	8.85166	8.83636	8.68937	8.4974	8.47483	8.21619	8.71347	8.95794	8.62769	8.65875	8.55639	8.64462	8.88483	8.29414	8.08328	8.03041	8.35062	8.21741	7.21493	8.20114	8.39229	7.74234	8.25659	8.02051	8.62204	8.20543	7.0641
Pygl	NM_133198	1	10.6262	10.8506	11.0961	6.12344	6.60635	6.50255	6.06359	6.1994	6.30852	6.49953	6.76122	6.12497	6.40992	7.79464	7.11865	7.38034	7.11662	6.44069	6.59944	7.69287	7.72644	7.61758	6.91639	6.82759	6.13734	7.01042	7.33805	6.68973	8.00013	7.39541	7.09744	7.28421	6.77963
Rab27a	NM_001301230	1	10.542	10.5573	10.4437	7.67346	7.42247	7.61773	7.68183	7.74419	7.57325	7.96167	6.74493	6.95671	7.88773	7.87613	7.94584	7.22241	7.50568	6.44069	7.68545	8.32656	8.10074	8.21284	7.79393	7.06243	7.68889	8.1826	7.63079	7.33001	8.24587	7.63514	7.90092	7.68665	7.40715
Rab29	NM_144875	1	9.09397	9.21567	9.45332	7.23242	7.17859	7.40919	7.03391	7.0323	6.88121	6.77034	7.01329	7.10234	7.64281	8.28703	7.95789	7.85421	7.88353	8.03326	7.01114	7.29448	7.0858	7.33224	7.58184	7.20013	6.55741	7.64629	7.61174	7.23408	7.65598	8.0016	7.46464	7.66701	7.6841
Rab32	NM_026405	1	10.3057	10.9704	11.0781	8.4705	8.32093	8.15929	8.22827	8.46236	8.75337	8.66171	7.98553	8.01933	8.53573	8.86784	9.02725	9.13943	8.98926	8.22321	8.54061	8.56257	8.13503	8.95798	7.95938	8.51004	7.03969	8.58685	7.8417	7.89354	9.76039	8.90532	8.47652	8.38449	8.75874
Rab44	NM_001002786	1	8.65669	8.41754	8.70114	5.79121	5.64386	5.80993	5.64386	5.64386	5.67723	5.81322	5.71249	5.64386	5.8032	5.64386	5.75857	6.32612	5.94146	6.58616	5.76208	5.64386	5.9046	6.10804	6.26621	6.06031	5.82774	6.32315	5.853	5.76649	6.53941	6.06413	5.84699	5.72208	5.64386
Rab5b	NM_177411	1	8.76506	8.40565	8.81102	7.81798	7.49539	7.61773	7.83903	7.94087	7.53733	7.44754	7.62502	7.23462	8.12747	7.70827	7.55943	7.85421	7.71679	6.71832	7.54408	7.53538	7.39968	7.75065	8.42326	7.49594	6.75193	7.61897	7.26677	7.73235	7.46584	7.39541	7.53983	7.12055	7.91635
Rac1	NM_009007	1	12.5578	12.808	12.8071	11.7909	11.5831	11.6067	11.618	11.9347	12.051	11.6954	11.3435	11.0852	11.7597	11.8804	12.0171	11.5957	11.8782	11.2832	11.8652	11.3813	10.9903	10.8723	11.3676	10.7704	10.4644	11.1228	10.7605	10.683	11.139	11.394	11.662	11.3423	10.7129
Rad51ap1	NM_009013	1	8.80467	8.56384	8.1908	6.79366	7.05538	6.09383	6.44535	6.56015	6.48853	7.06689	6.6254	6.7947	7.16406	6.32384	6.78143	6.32612	6.66602	6.71832	6.98706	8.08269	7.72644	7.57719	7.5036	7.41339	7.03969	7.24296	7.16589	7.16143	6.39163	6.91905	7.62518	7.52146	6.42494
Rad9a	NM_011237	1	9.89681	9.57549	9.65748	7.46973	7.1183	7.24483	7.70536	7.45336	6.99148	7.44754	7.23948	7.13656	7.46353	7.84947	8.11688	8.80523	8.43032	6.83937	7.4937	8.19228	7.63354	8.10333	8.14264	7.78574	7.34126	7.82431	7.55303	7.40745	7.71935	8.23001	8.0728	8.43181	8.17728
Ramp1	NM_016894	1	11.1673	10.8329	10.6835	9.69644	9.43737	9.88996	9.8099	9.41262	9.26788	9.33954	9.47472	9.78875	9.99596	9.84356	10.2417	9.04822	9.97513	7.55644	8.8783	7.87922	7.21965	7.35631	7.55623	7.23259	8.73897	7.84803	8.03999	7.21985	6.8537	7.65948	8.54382	8.12132	7.30162
Rarg	NM_001042727	1	8.60379	8.53137	8.53775	6.45353	6.77204	6.92091	6.32896	6.747	6.05279	5.96475	6.45557	6.93743	6.50573	7.41298	7.3918	7.55617	7.17497	5.88792	6.11299	6.29515	6.97657	7.40328	6.60281	6.78445	6.96315	6.68114	7.59243	6.91857	6.5741	7.14268	7.2305	7.30977	7.0641
Rassf3	NM_138956	1	9.55053	9.69268	9.79599	7.80648	7.58722	7.78668	7.79583	8.11392	7.79472	7.64	7.35135	7.32642	8.20564	8.24675	8.19026	8.67409	8.18267	8.46814	7.2725	7.35858	7.8137	7.83871	8.36544	7.71856	7.64057	7.84803	7.53292	7.59566	7.73476	7.90313	8.20805	7.9036	8.29195
Rbks	NM_153196	1	8.71606	8.70638	8.37888	7.29962	7.60929	7.57222	7.1064	7.11609	7.60828	7.28422	7.59806	7.20266	7.5708	7.2994	7.35581	7.52268	7.33706	7.69121	7.23209	6.74225	6.77386	6.54496	6.91639	7.67198	6.92332	7.50419	7.63079	7.40745	6.43002	7.4241	8.15163	7.68665	6.42494
Rbm43	NM_001141982	1	9.13804	9.08008	8.94751	7.02966	6.64959	6.65588	6.74693	7.0887	6.82274	6.64129	6.91477	6.81597	7.06269	7.17611	7.35581	6.89607	7.14608	6.0966	6.72121	7.64225	7.05031	7.00694	7.36297	7.02586	6.7057	7.27833	7.2422	7.02067	6.96246	7.53347	7.07739	7.03119	7.40715
Rbmxl1	NM_009033	1	9.43414	9.72175	9.57559	8.41854	7.5189	7.55671	8.54757	8.38563	7.83964	8.32601	8.15542	7.88487	8.45803	7.97808	7.81939	8.1011	8.12464	7.55644	8.49865	8.69261	8.34002	8.03041	8.67007	8.42831	8.02637	8.57268	8.20161	7.82933	8.17982	7.92338	8.50682	8.80867	7.0641
Recql	NM_023042	1	8.40168	8.56384	8.31009	6.86194	6.51576	7.01465	7.14133	6.71152	6.77729	6.85039	6.6254	6.68336	7.12437	6.89256	7.20211	6.99708	7.08654	5.88792	6.91233	7.22739	7.01391	7.33224	6.79024	6.6467	7.14737	6.96773	7.11268	6.34078	6.96246	6.99751	7.66603	7.17719	6.20842
Reep5	NM_007874	1	11.4355	11.4444	11.2173	9.33734	9.31513	9.08243	9.40533	9.72439	9.0205	9.58156	9.71533	8.98539	9.73111	10.2059	10.2662	10.1691	10.2508	9.27937	9.03329	9.87888	9.68403	9.92439	10.2722	9.06403	9.74635	9.70653	9.14157	9.55244	10.2371	9.92158	9.49382	9.83995	10.2282
Reps1	NM_001111065	1	8.68244	8.49816	8.55272	6.92714	6.31553	6.53454	6.87696	7.22077	7.16622	6.9627	6.58936	6.72893	7.04154	7.04129	7.09701	7.18007	7.02442	6.83937	7.05812	7.00512	7.31247	7.37998	7.20712	6.86949	7.00193	7.09218	6.77872	6.66893	6.46741	6.95882	7.30136	7.06159	7.18774
Rexo1	NM_025852	1	9.97873	9.89337	10.1035	8.33292	8.23836	8.71457	8.3822	8.5352	8.34967	8.32601	7.95752	8.12539	8.63088	8.69896	8.86386	8.7771	8.80756	7.75415	7.95738	8.19228	8.42563	8.58288	9.24371	8.74197	8.39014	8.30766	8.68437	8.0706	8.45578	8.62547	9.02935	8.8701	8.7183
Rfwd3	NM_146218	1	8.46238	8.50931	8.54525	7.33208	7.23645	6.99178	7.14133	6.97359	7.11842	6.9627	6.91477	6.87798	7.34765	6.24422	6.7261	6.47362	6.78318	7.242	7.29228	7.74176	7.12045	7.30777	7.23967	7.35561	6.92332	7.01042	7.55303	6.91857	6.96246	6.65429	6.73746	7.17719	5.64386
Rmnd5b	NM_025346	1	9.25702	9.43044	9.50809	7.9176	7.65244	8.00796	7.99992	7.76165	8.10179	7.97957	7.69455	7.52034	8.23389	8.26703	8.3634	7.79933	7.95187	7.32727	7.57671	8.04422	7.18733	7.87248	7.95938	7.54847	7.27948	7.93923	7.77476	7.36925	7.80946	8.24616	8.28874	8.03201	7.6841
Rnaseh2b	NM_026001	1	9.33483	9.54871	9.27981	8.23332	8.3605	7.85163	7.58366	7.9099	8.26986	8.53422	8.25658	7.92458	8.12747	7.51828	7.57517	7.55617	7.67697	6.27888	7.96972	8.47852	7.74875	7.30777	7.5036	7.64811	8.18641	7.72529	7.87403	7.79131	7.20312	7.88261	8.25343	8.12132	6.77963
Rnaseh2c	NM_026616	1	11.3227	10.9481	10.8758	9.21213	9.23931	8.98157	9.26193	9.41262	8.70159	9.25384	8.9143	8.91319	9.6841	9.44114	9.4885	8.89958	9.30881	8.39102	8.99759	9.54876	9.19197	9.39557	9.38134	9.44958	9.72333	9.00082	9.3854	9.28475	9.41768	9.56373	9.64452	9.38481	9.25918
Rnd3	NM_028810	1	8.87333	8.93869	9.24798	7.58196	7.05538	7.46005	7.47832	7.77889	7.49116	7.59424	7.02683	7.60831	8.50515	7.64767	7.83254	8.07823	7.52824	9.23593	7.89405	6.74225	6.48575	6.21719	6.652	6.86949	6.7057	7.24296	6.29644	6.51415	6.53941	7.07192	7.05706	6.9027	6.42494
Rnf115	NM_026406	1	8.59478	9.61734	9.65402	8.03069	7.65244	7.26405	8.24442	8.3046	8.24781	8.06593	7.82428	7.75871	8.15728	8.05008	8.38141	8.03137	8.04866	7.05469	8.05326	8.26098	8.32525	7.82153	6.9561	7.89118	8.0997	8.00402	7.96691	7.90248	8.32948	7.98244	8.0829	8.12132	7.6841
Rnf130	NM_021540	1	11.2077	11.6155	12.0343	9.55235	9.34174	8.91628	9.8891	9.81913	10.0435	9.44643	9.03982	9.44057	9.84234	10.821	10.5591	10.8303	10.6066	9.30061	9.63884	9.62892	9.1253	9.72162	9.61635	8.82947	7.86748	9.31361	9.07358	9.43407	9.88307	9.71651	9.50887	9.5969	8.98013
Rnf166	NM_001033142	1	11.0453	10.917	11.1289	8.68674	8.50877	8.79603	8.80885	8.69816	9.13904	8.78903	8.30183	8.34617	8.4974	9.15584	9.11061	9.28637	9.2146	7.928	8.52397	8.8346	9.09077	9.1284	9.18644	8.92195	8.70412	8.69547	9.14157	8.79701	9.09824	9.42866	9.14945	8.88717	8.87368
Rnf26	NM_153762	1	8.99473	8.78192	8.57488	6.98953	6.95553	7.30172	7.1064	6.94332	6.82274	6.54834	7.07976	6.7947	7.25877	7.44894	7.4947	7.18007	7.61509	6.44069	6.86026	7.41995	7.0858	7.0954	7.33311	7.02586	6.50438	6.78313	6.99998	6.77012	6.67344	7.70694	7.95687	7.76265	6.77963
Rnf38	NM_001038993	1	9.15653	9.28871	9.53472	7.37944	7.37172	7.5092	7.24132	7.45336	7.62548	7.52275	6.98583	7.08493	7.72473	8.11866	8.13823	7.98294	8.21084	6.83937	7.12585	6.92271	7.39968	7.30777	7.13975	7.49594	6.88234	7.44318	7.33805	7.23408	7.26813	7.75291	8.27119	7.52146	6.92887
Rnpep	NM_001159624	1	10.8126	10.898	11.1101	9.41894	8.98456	9.20679	9.28554	9.46683	8.48777	9.38728	8.52817	8.60027	9.61775	9.71658	9.86333	9.71487	9.91648	9.07268	9.14087	9.93251	9.67823	9.75821	10.3783	9.64917	8.69232	9.27911	9.08052	8.92102	9.48759	9.99991	10.2945	10.0326	9.34137
Rpa1	NM_001164223	1	10.0628	9.4992	9.29324	8.15384	8.00855	7.71868	8.01883	8.02999	7.76398	7.74843	7.50437	7.71409	8.44196	8.32622	8.50159	8.29211	8.46581	7.32727	7.42367	8.50709	8.10074	8.15912	8.99001	7.89118	7.42924	8.58685	7.96691	7.60665	7.46584	8.94546	9.28239	8.88717	9.04698
Rpa2	NM_011284	1	9.38795	9.36439	8.99758	7.45507	7.29209	6.99178	7.70536	7.97119	7.33259	7.54697	7.47504	7.37023	8.25242	7.17611	8.05088	7.55617	7.9181	7.242	7.16929	8.38927	7.97385	7.40328	8.54544	7.69546	7.61578	7.89435	7.8417	7.30324	6.96246	7.96302	8.83406	8.52205	7.84301
Rrm1	NM_009103	1	10.6084	10.4715	10.083	8.60939	8.34744	8.13862	8.1954	8.29264	7.72461	8.57012	8.53292	7.88487	9.01425	8.02648	8.46827	7.79933	8.69243	7.40777	8.07627	9.38912	8.34002	8.01537	8.99954	8.77541	8.59423	8.7214	8.31195	7.70194	7.98732	8.77774	9.63082	9.19212	8.23576
Rrm2	NM_009104	1	9.57364	10.1394	9.53095	7.24952	6.51576	6.46982	6.55304	6.94332	6.52566	7.06689	7.06671	6.5373	7.24032	6.39929	6.95987	6.89607	7.11662	7.05469	6.93766	8.35826	7.28219	6.31868	6.91639	7.23259	5.9116	7.13137	6.43294	6.51415	6.08984	7.68341	8.21724	8.12132	6.77963
Rspo1	NM_138683	1	8.14205	8.04073	8.39558	5.79121	5.72697	5.70135	5.73815	5.85372	5.64386	5.64386	5.64386	5.64386	5.752	5.97506	5.81268	6.07202	6.00717	5.64386	5.76208	5.83623	5.82281	6.54496	5.82635	5.8251	5.64386	6.51322	5.7866	5.68591	6.13701	6.13525	6.06633	6.28283	5.64386
Rsrp1	NM_023665	1	11.8941	12.1954	12.2772	10.9941	10.7499	10.6743	10.7495	11.2544	10.8805	10.5989	9.76869	10.2732	10.8641	11.2381	11.37	11.4717	11.2652	9.8966	10.7762	11.0632	11.025	10.4485	10.6775	10.1087	9.3553	10.9054	10.1994	10.3437	10.4806	11.1236	11.3283	11.2677	11.0427
Rsu1	NM_009105	1	9.89314	10.3954	10.3569	8.41096	7.81321	8.10704	8.73073	8.35146	8.34448	8.50978	7.96457	8.27114	8.67276	8.86784	9.04431	9.25612	9.2146	8.30955	8.66723	9.08249	8.6076	8.85194	7.89954	8.52322	7.82486	8.69547	8.43627	8.25648	9.13356	8.69775	8.72873	8.37241	8.29195
Rufy1	NM_172557	1	8.91735	8.65707	8.97554	7.41017	7.1183	7.4433	7.70536	7.27038	7.31148	7.36818	7.13082	7.20266	7.34765	7.51828	7.81939	7.62091	7.43581	5.88792	7.4765	7.29448	7.25126	7.35631	7.17383	6.82759	6.88234	7.41169	7.42792	6.84626	7.13504	7.68341	7.66603	7.35957	6.92887
Rwdd2a	NM_001145968	1	7.53619	7.91214	8.09181	5.88171	5.64386	6.05024	5.64386	6.0369	6.05279	5.64386	5.92989	5.64386	6.03494	6.47099	6.3032	6.07202	6.29715	6.0966	5.87135	6.15779	5.9046	5.92704	5.90961	5.73731	5.82774	6.10417	5.7866	5.95021	6.5741	6.65429	6.06633	5.99842	6.42494
S100a10	NM_009112	1	13.2948	13.3075	12.9414	12.5231	12.2295	12.0904	12.6205	12.7638	12.2744	11.8311	12.0085	12.0405	12.7759	11.6294	12.0764	11.1539	12.091	11.8851	12.5502	11.1244	10.9183	10.6542	11.1473	10.8897	10.9442	11.5778	11.5674	10.8179	9.92062	11.1688	12.2012	11.4753	10.4295
S100a4	NM_011311	1	15.1847	14.9445	14.9023	7.04931	8.82396	8.88559	7.07061	7.14299	7.63401	6.54834	7.57059	7.46754	6.95367	9.13392	9.43775	10.1195	9.98739	7.15138	7.52748	9.96376	7.65733	9.07138	8.38011	8.85054	8.21969	8.79649	7.55303	7.20546	9.36911	7.1768	7.36891	7.58564	7.18774
S100a8	NM_013650	1	11.2092	10.3557	9.94806	6.12344	7.39732	6.00527	5.73815	5.91738	5.89149	6.16585	5.74564	6.19158	5.752	6.15995	5.81268	7.34245	5.94146	5.88792	6.56732	6.92271	8.23327	7.8557	6.55189	6.32405	7.24757	7.98275	6.63516	6.77012	6.98841	5.82688	5.79883	5.79629	5.64386
S100a9	NM_001281852	1	12.3961	11.9976	11.8752	6.36217	7.99184	6.71293	6.55304	6.63781	6.48853	6.92622	5.77802	6.34582	6.37652	6.72671	5.91519	8.16762	5.94146	6.27888	7.71506	9.43444	9.69557	9.88357	8.0355	8.28088	9.24649	9.69349	8.23934	7.50462	8.8799	5.82688	6.22054	6.6053	7.0641
S1pr4	NM_010102	1	9.43414	9.2757	8.83571	5.74376	5.72697	5.86131	5.98884	5.97838	5.70987	5.73102	6.01389	5.78	5.85262	6.15995	5.75857	5.76339	6.24363	5.64386	5.64386	6.00596	6.53795	6.77664	6.20159	5.90783	6.20537	6.10417	6.81249	6.66893	6.22697	7.21014	6.81215	6.96837	7.84301
Sap30	NM_021788	1	9.70502	10.1537	10.2369	6.62051	6.20393	6.65588	6.44535	6.9124	6.41129	6.85039	6.47546	6.28609	7.14435	7.44894	7.65138	8.05499	7.88353	7.32727	6.66161	7.29448	6.72966	7.06651	7.10484	7.26435	7.11236	6.96773	6.70873	6.44238	7.0878	7.55957	7.85455	7.72515	7.18774
Sbk1	NM_145587	1	7.98543	7.78938	8.01824	6.67214	5.88005	6.79448	6.74693	6.8485	6.46961	6.28586	6.55238	6.31625	6.90764	6.6045	7.00705	6.78745	6.78318	6.27888	6.53447	6.00596	6.58831	6.21719	6.4991	6.26251	6.13734	6.32315	6.81249	6.05018	6.04107	6.44624	6.73746	6.42993	5.64386
Scand1	NM_020255	1	12.5961	12.4299	12.4938	10.809	10.8035	11.128	11.1194	11.2374	10.9185	10.6969	10.4523	10.7363	11.2058	11.8404	11.9545	11.7538	11.989	10.8366	10.6028	10.8843	10.3748	10.7617	11.2567	10.882	10.8961	10.5623	10.8848	10.6247	10.8247	11.8182	11.7149	11.719	11.7068
Selenoh	NM_001033166	1	10.7016	10.6075	10.2392	8.58939	8.91537	8.4882	8.41112	8.59484	8.48306	8.67276	9.01964	8.56928	9.04646	8.74307	8.88926	8.56315	8.66216	8.30955	8.88483	9.31027	8.82274	8.7557	9.78019	9.31961	9.19722	8.87942	8.86416	8.4519	9.21825	9.00364	8.84596	8.99352	8.79808
Sell	NM_001164059	1	10.5112	11.5736	11.6871	5.69466	5.64386	5.80993	5.64386	5.64386	5.64386	5.64386	5.64386	5.64386	5.64386	5.64386	5.70235	5.97629	5.64386	5.64386	5.76208	5.83623	6.05546	5.92704	5.73798	5.64386	5.73874	5.64386	5.853	5.64386	6.18269	6.06413	6.10645	6.119	5.95359
Sema4a	NM_013658	1	10.8772	10.7507	10.815	9.4377	9.23222	9.44429	9.40533	9.28566	9.74411	8.69461	8.67299	9.29286	9.50634	10.718	10.5866	10.5806	10.4081	9.40236	9.50536	7.58981	7.68073	7.98482	7.85822	7.82885	6.92332	8.1826	8.36979	8.0706	7.33034	8.96511	9.34243	9.22607	8.23576
Serpinb10	NM_198028	1	9.2106	9.89762	9.74152	5.64386	5.64386	5.64386	5.64386	5.64386	5.64386	5.64386	5.74564	5.64386	5.64386	5.64386	5.64386	5.76339	5.64386	5.64386	5.70418	5.64386	5.73612	5.98993	5.64386	5.64386	5.64386	5.74841	5.71699	5.64386	5.64386	5.64386	5.69738	5.79629	5.64386
Setd1b	NM_001040398	1	10.4274	10.1501	10.5482	8.21603	7.60929	8.60582	8.57338	8.31646	7.9598	8.0826	7.92896	7.99156	9.05705	9.17743	9.24459	9.69996	9.43355	8.74099	8.01805	8.35826	8.24901	8.23896	9.40305	8.2011	7.86748	8.30766	8.06821	8.14031	8.0379	9.09569	9.45549	9.22607	8.49711
Sft2d1	NM_134114	1	10.0331	9.93533	10.1632	8.52767	7.77467	8.50445	8.74215	8.91646	8.53406	8.52205	8.25658	8.18383	9.01425	8.69896	8.47667	8.79124	8.57817	8.57659	8.42886	8.71727	8.6076	8.46608	9.60391	8.53628	8.0997	8.20114	8.51014	8.17024	8.94099	8.4129	8.34852	8.38449	7.6841
Sfxn3	NM_053197	1	8.70772	9.00325	9.1232	8.05033	8.16575	8.45515	8.2604	8.46236	8.85897	7.64	7.80869	8.14233	8.05542	8.28703	8.47667	8.57953	8.70239	7.40777	7.38734	7.35858	7.15428	7.37998	7.27149	6.54696	6.44933	7.09218	7.77476	7.56219	7.01391	7.96302	7.95687	7.47703	7.76574
Sgpp1	NM_030750	1	9.7544	9.46523	9.30212	7.66074	7.02286	6.99178	7.63358	7.22077	8.01959	7.70603	7.48489	7.17	7.67064	7.70827	7.84558	8.36951	8.35661	7.928	7.65521	7.78904	7.97385	7.15149	8.33564	7.76369	6.92332	8.43845	7.49183	7.57344	7.38998	8.21366	8.70932	8.50001	7.98614
Sh2d3c	NR_045535	1	9.2684	8.89682	9.22947	6.86194	6.98959	6.82066	6.70084	7.14299	6.56186	6.39666	6.3518	6.68336	6.83572	7.2994	7.28101	6.99708	7.02442	6.71832	6.31992	7.29448	7.65733	7.51441	7.17383	7.02586	8.41908	6.96773	7.53292	7.91137	7.46584	7.81921	7.81876	7.49942	7.76574
Sh3bgrl	NM_019989	1	9.02187	10.2665	10.3968	9.33334	9.42498	8.61333	9.02999	9.35629	9.39622	9.5278	8.8472	9.1452	9.39815	9.45888	9.76726	9.9153	9.8374	7.75415	9.30081	9.64186	8.99133	9.10728	8.22622	8.64881	8.04506	9.63331	8.91166	9.17093	9.1509	9.1396	9.36741	9.54404	9.23071
Sh3bp5	NM_011894	1	9.49834	9.60179	9.76741	7.19761	6.31553	7.30172	6.74693	7.57682	7.50981	6.92622	6.98583	7.25033	7.43136	7.55172	7.40947	7.30353	7.17497	6.95104	6.72121	8.41964	8.8744	8.53095	8.6091	7.23259	8.11746	8.58685	8.21429	8.14031	7.01391	7.88261	7.74442	7.68665	7.50549
Sh3gl1	NM_001252471	1	9.08756	8.93869	8.92468	7.33208	6.84826	7.88924	7.77374	7.87825	7.08149	7.13239	6.84004	7.21873	7.81478	8.68395	8.67958	8.21033	8.55639	7.32727	6.8335	7.69287	7.18733	7.23175	7.8371	7.44143	7.24757	7.34655	7.19178	7.39482	7.11162	8.12906	8.34852	7.9531	7.30162
Shisa5	NM_025858	1	11.4875	11.8364	11.9799	10.3554	9.99354	10.3176	10.0722	10.4557	10.0923	9.59904	9.83754	9.74505	10.236	10.7543	10.5729	10.556	10.7138	9.47889	10.3852	10.3263	10.8859	10.362	10.0744	9.7423	9.51125	10.0816	10.0159	10.5626	9.9407	11.1688	10.7972	10.6022	11.3643
Siglecg	NM_172900	1	8.0262	7.87812	7.65199	5.69466	5.64386	5.64386	5.82665	5.71727	5.67723	5.64386	5.64386	5.64386	5.752	6.07045	5.96382	6.94746	6.07002	5.88792	5.76208	6.29515	5.82281	5.64386	5.98832	5.8251	5.64386	5.74841	5.64386	5.91531	6.08984	6.65429	6.10645	6.33355	6.92887
Sirpb1a	NM_001002898	1	7.71311	8.18686	8.46842	5.64386	5.72697	5.80993	5.73815	5.71727	5.83345	5.81322	5.8097	5.64386	5.64386	5.87288	5.70235	5.87376	5.64386	5.64386	5.87135	6.83531	6.43159	6.21719	5.82635	6.1982	5.64386	5.93723	5.7866	5.8428	6.70509	5.64386	5.749	5.79629	5.64386
Sirpb1b	NM_001173460	1	8.2026	8.69665	8.87195	5.92491	6.31553	5.75668	5.82665	5.78709	5.91967	6.54834	5.77802	5.78	5.8032	6.24422	6.05643	6.66998	6.18804	5.64386	5.92303	6.64279	6.58831	6.31868	5.82635	6.13091	5.64386	6.25378	5.853	6.11316	7.24679	5.91037	6.02505	5.93414	5.64386
Siva1	NM_013929	1	10.3304	10.3464	10.2369	8.21603	7.97495	8.21958	7.99992	8.01552	8.05176	8.23947	8.44488	8.30162	8.51286	8.5579	8.39921	8.56315	8.789	8.03326	7.95738	8.56257	8.49328	8.23896	8.84947	8.62455	8.33046	8.454	8.70249	8.18497	8.08678	8.97484	8.68964	8.53294	8.49711
Skap2	NM_018773	1	10.5208	10.6408	10.6334	8.73609	8.83336	8.55212	9.39089	9.16624	9.25689	9.25384	8.71542	8.64255	8.98129	9.8368	9.67168	10.1745	9.73446	8.61101	9.07387	9.52101	8.86422	9.28079	8.89104	8.80809	7.94911	8.83261	8.65675	8.29094	9.86916	9.52452	9.24692	9.21935	9.04698
Slc16a10	NM_001114332	1	9.43918	9.35205	9.63656	6.26465	6.36826	6.09383	6.32896	6.14725	6.22068	6.28586	5.98643	6.12497	6.40992	7.55172	7.30008	7.90709	7.45948	6.0966	6.43119	7.00512	6.43159	6.70347	6.99475	6.6467	5.99084	6.87838	6.63516	7.02067	6.79608	6.99751	7.94585	7.72515	6.42494
Slc25a12	NM_172436	1	9.36163	9.39479	9.44131	8.02077	7.95784	7.81301	8.05592	8.19324	8.13821	7.78962	7.09269	7.6325	7.62869	8.30676	8.45981	8.1011	8.09473	6.58616	7.81419	7.64225	7.65733	7.40328	8.01685	7.54847	7.24757	7.44318	7.38368	7.19093	7.82395	8.02051	8.02126	8.17794	7.0641
Slc25a4	NM_007450	1	9.88207	10.4456	10.4853	8.88025	8.3605	8.8415	8.27619	8.87697	8.61811	8.90603	8.76474	8.58795	9.03045	9.5023	9.00418	8.84642	8.789	8.13135	8.74825	9.71714	9.55066	9.31189	9.53347	8.62455	9.42115	9.52708	9.03834	9.18198	9.2826	9.0504	9.00832	8.65761	9.01394
Slc44a2	NM_152808	1	9.43414	9.20198	9.57925	6.79366	6.95553	7.24483	7.33481	7.1953	7.2125	6.8888	6.97189	6.99451	7.49501	7.64767	7.59074	7.55617	7.61509	6.71832	6.77845	7.47883	7.39968	7.49285	7.65605	7.20013	7.03969	6.96773	7.49183	7.21985	8.12238	7.33625	7.47999	7.30977	7.0641
Slc8b1	NM_001177594	1	9.25702	8.84493	9.04598	7.68608	7.31913	8.03057	7.94167	7.55696	7.68413	7.10001	7.29649	7.15338	7.93438	8.72852	8.7506	8.91257	8.79831	7.928	7.25244	6.64279	6.31678	7.00694	7.47655	7.16692	6.7057	7.16953	6.90927	6.53731	7.62322	7.27457	7.47999	7.17719	7.50549
Slfn4	NM_001302559	1	7.15001	7.69482	8.24708	7.19761	6.69158	6.84639	7.14133	7.51641	6.83758	7.31275	6.37316	7.08493	7.16406	8.11866	7.54351	7.41726	8.15395	6.95104	7.68545	6.64279	6.63699	6.26883	5.98832	6.32405	5.9116	6.62732	6.14568	6.36685	6.5741	5.9893	6.35987	6.38255	6.20842
Slk	NM_009289	1	11.037	11.0083	11.1101	9.78996	9.51542	9.53408	9.90951	9.88032	9.9914	9.63903	9.40124	9.4508	9.71783	9.24034	9.37169	9.316	9.5205	9.25782	9.65421	9.50694	9.38243	9.47466	9.10045	8.85054	8.73897	9.3556	9.18732	8.75812	9.40328	9.11342	9.43987	9.23277	8.39818
Smim5	NM_183259	1	9.08112	9.34584	9.34573	6.53944	6.51576	7.14473	6.70084	6.2984	6.6145	6.03494	6.74493	6.72893	6.83572	5.97506	6.66857	6.16179	6.34875	6.44069	6.50087	5.83623	6.05546	6.21719	6.32805	5.64386	6.33251	5.93723	5.91648	5.76649	5.64386	5.91037	6.76279	6.05998	5.64386
Smn1	NM_011420	1	9.17478	9.34584	9.41289	8.00072	7.755	7.54105	8.14466	7.92547	7.80231	7.86863	7.49466	7.45403	8.34167	8.2053	8.45981	8.12362	8.18267	8.03326	7.78656	8.35826	7.63354	7.7687	8.12533	7.52245	7.3107	7.98275	7.61174	7.27598	7.65598	8.1635	9.03456	8.5862	7.84301
Snrpb	NM_009225	1	11.6658	11.9747	11.9944	10.3395	9.97241	10.4304	10.3324	10.3758	10.1499	10.3497	10.2244	9.87489	10.9867	10.9204	11.142	10.7053	11.0207	10.5299	9.99632	10.4119	9.90878	10.2051	10.28	10.4289	10.5122	10.0461	10.4479	9.81651	9.97681	10.7142	11.294	10.966	10.5146
Snx1	NM_019727	1	11.2657	11.1769	11.4569	9.65214	9.62781	10.0507	10.0677	10.0779	9.69403	9.35335	9.46729	9.38471	9.86961	9.916	10.0663	9.86941	10.1849	8.94361	9.79261	9.10135	9.32418	9.23609	9.54001	9.1684	8.59423	9.21669	9.2379	9.20747	9.38874	9.49777	9.98307	9.90847	9.34137
Snx2	NM_026386	1	9.39315	10.5786	10.4437	9.38839	9.11369	8.38667	9.45477	9.36774	9.59051	9.53387	8.84337	8.94733	9.36447	10.0969	10.1554	10.5684	10.138	8.91635	9.65803	10.1106	9.39664	9.10728	8.59659	8.67267	8.04506	9.07307	9.04546	8.9558	9.59708	9.6144	9.21056	9.67765	8.91005
Snx27	NM_029721	1	10.7099	10.2197	10.495	8.56911	8.41164	8.66484	8.62365	8.57524	8.19693	8.20943	8.20986	8.20817	8.51286	8.81372	8.62013	8.79124	9.00543	7.87235	8.08763	8.76535	8.38346	8.28984	9.05546	7.78574	7.51216	8.20114	8.23934	8.29773	8.46506	8.75533	8.81602	8.48887	8.49711
Socs6	NM_018821	1	8.24927	8.7634	8.79223	7.39488	7.02286	6.79448	7.55804	7.4957	7.84699	7.39512	6.97189	7.17	7.51049	7.70827	7.40947	8.00736	7.48276	6.71832	7.57671	6.92271	7.31247	6.9448	6.652	6.86949	6.7057	7.01042	6.90927	6.5601	6.98841	7.1768	7.46464	7.33488	6.92887
Sorl1	NM_011436	1	10.0264	10.004	10.4316	8.4705	8.8795	9.04958	8.53449	8.84457	8.99094	8.62804	8.16769	8.38228	8.4974	8.41978	8.03958	8.33133	8.74152	8.35086	8.80444	8.69261	8.26458	8.40969	9.90718	7.78574	6.96315	7.93923	7.85796	7.61755	8.85895	8.77774	8.03171	8.77237	8.29195
Sowahc	NM_172939	1	8.64801	9.13153	9.08253	8.00072	7.39732	7.81301	8.48096	8.16729	8.03255	8.17875	7.25107	7.45403	8.53573	8.72852	8.90803	9.61511	8.30529	7.242	8.3366	7.29448	6.89887	7.20549	7.36297	7.13293	6.55741	7.47401	6.94014	7.26215	8.639	7.73011	7.75708	8.10681	7.30162
Sp100	NM_013673	1	9.89681	9.99608	10.0649	6.51136	6.36826	6.65588	6.55304	6.81545	6.6145	6.28586	6.69491	6.40317	6.56624	7.44894	7.70959	8.12362	7.57232	6.27888	6.28084	7.22739	7.79238	7.93774	7.5036	7.06243	7.3107	7.44318	7.63079	7.43236	7.46584	8.23001	7.76963	7.93679	7.59756
Sp110	NM_175397	1	9.72167	9.71212	10.0225	6.77017	6.64959	6.74063	6.44535	6.94332	6.64857	6.59556	6.57099	7.18642	6.5363	7.41298	7.84558	7.38034	7.25829	6.71832	6.75011	7.35858	7.34214	7.83871	7.55623	6.98832	6.60854	7.31284	7.49183	7.67087	7.67209	7.84066	7.28397	7.38384	7.0641
Sp2	NM_001080964	1	8.91011	8.65707	8.81723	6.83954	6.73236	7.16531	7.36468	6.71152	7.18955	6.54834	6.67785	6.83693	6.90764	7.82232	7.76553	7.62091	7.31128	6.0966	6.96257	6.83531	6.85839	7.03703	6.9561	6.13091	6.13734	6.62732	6.74415	6.41765	6.46741	6.99751	7.5251	7.78104	7.50549
Spaca9	NM_027283	1	7.64492	7.73339	7.36034	5.69466	5.80552	5.70135	5.73815	5.71727	5.70987	5.73102	5.77802	5.73601	5.69894	6.15995	6.05643	6.07202	6.07002	5.64386	5.76208	6.15779	5.82281	6.45866	5.90961	6.13091	5.99084	6.02312	5.7866	5.72675	6.46741	5.82688	5.84699	5.93414	5.64386
Spg21	NM_138584	1	10.4401	10.3802	10.8041	8.40334	8.02506	8.42985	8.48096	8.29264	8.58771	8.16317	7.75274	8.08214	8.56568	9.18811	9.02151	9.02448	8.55639	7.40777	8.22779	8.38927	8.31032	8.57264	8.99954	8.32671	7.90887	8.65569	8.18881	8.19229	8.92091	9.00364	8.88108	8.54375	8.39818
Spidr	NM_146068	1	8.5301	8.54227	8.50735	6.83954	6.64959	6.50255	7.14133	7.0323	6.66529	6.81092	6.51444	5.98172	6.90764	7.04129	7.22224	6.94746	6.82022	6.44069	6.59944	7.00512	6.58831	6.58625	7.17383	6.69409	5.9116	6.62732	6.59692	6.46671	6.93603	6.38917	7.05706	7.17719	6.61316
Spn	NM_009259	1	11.0034	10.746	10.4636	5.79121	5.72697	5.64386	5.82665	5.64386	5.89149	5.81322	5.64386	5.69067	5.752	6.24422	6.3032	6.72991	6.39857	5.88792	6.02112	7.29448	7.63354	6.70347	6.32805	6.1982	6.96315	7.05187	7.16589	7.26215	6.70509	7.47982	7.07739	7.23169	7.76574
Sptssa	NM_134054	1	9.38795	9.84575	9.90497	8.76014	8.13565	8.19977	8.62365	8.94729	8.77281	8.57012	8.66001	8.33148	9.21184	8.92002	8.99835	8.84642	8.93964	7.15138	8.71198	8.50709	8.64377	7.98482	7.85822	8.46975	8.50257	8.52931	8.55072	8.18497	8.20218	8.84294	9.18737	9.07775	7.76574
Srd5a3	NM_020611	1	8.69934	9.36439	9.36282	7.64791	7.54203	7.47662	7.50538	7.51641	7.91853	7.66235	7.35135	7.49418	7.68436	8.32622	8.41678	8.21033	8.63124	7.48402	7.57671	7.29448	7.39968	7.90548	7.33311	7.93129	6.75193	7.34655	7.61174	7.31669	8.15712	7.96302	8.45337	8.2849	7.76574
Srsf9	NR_036616	1	10.556	10.6281	10.8305	8.68045	8.50877	9.44849	8.97296	9.10602	8.67705	8.57012	8.79671	8.39647	9.47512	10.0331	9.77069	9.89581	9.58109	9.14492	8.50714	9.08249	8.5579	8.92618	10.0653	8.76434	8.88094	8.85621	9.08743	8.72322	8.94762	9.23175	9.92255	9.17831	9.31449
Ssbp2	NM_024186	1	7.9292	8.35708	7.97446	6.08585	5.88005	6.17728	5.98884	6.2984	5.89149	5.89098	6.21655	5.86409	6.37652	7.13256	6.93568	6.47362	6.58225	5.88792	6.39505	6.42058	6.53795	7.0954	5.82635	6.26251	6.44933	6.68114	7.16589	6.88286	6.46741	7.39541	7.01552	6.76166	7.18774
Ssna1	NM_023464	1	10.1607	10.1572	10.1035	9.03614	8.98456	8.84789	9.0668	8.94729	8.35483	8.59357	8.81243	8.68941	9.26757	9.26071	9.25928	8.87325	9.46312	7.55644	8.31742	8.90068	8.29524	8.06002	8.25834	8.58738	9.01018	8.27302	8.57059	8.49983	8.02542	8.99411	9.54582	9.12171	8.54415
St3gal2	NM_009179	1	9.19876	8.85371	9.16763	5.88171	6.01843	6.21727	6.06359	6.1994	6.02713	6.16585	6.33013	6.5373	6.5363	7.67829	7.07504	7.09148	7.14608	5.64386	5.92303	6.42058	7.34214	7.30777	6.60281	6.59768	6.13734	6.78313	7.33805	6.80868	6.53941	7.21014	6.97274	6.86871	7.30162
Stat5a	NM_011488	1	9.18682	8.05603	8.55272	6.42371	6.08296	6.59649	6.95757	6.5197	6.6145	6.77034	6.58936	6.40317	6.86009	7.55172	7.30008	7.30353	7.28502	6.44069	6.39505	6.92271	6.77386	6.58625	7.55623	6.69409	5.9116	6.96773	6.34339	6.5601	6.73606	6.87816	6.92864	7.09137	7.0641
Stk24	NM_145465	1	10.9707	10.767	11.1252	8.84131	8.4851	8.92837	9.24597	8.99234	9.18037	8.55825	8.33487	8.15907	8.88955	9.41411	9.42478	9.55839	9.25573	8.67747	8.81815	9.04403	8.58297	8.21284	7.89954	7.89118	8.08171	8.57268	8.21429	8.27725	8.77196	9.31836	9.43594	9.08517	9.14176
Stk26	NM_001313744	1	7.2452	8.26792	7.95206	6.36217	6.01843	6.05024	6.20238	6.39103	6.30852	6.03494	5.8097	6.05511	6.15801	6.15995	6.1006	6.07202	6.58225	5.64386	5.92303	5.83623	6.37533	5.98993	6.06296	5.64386	5.64386	6.02312	5.853	5.95021	5.93829	6.06413	5.8936	6.05998	6.77963
Stk38	NM_134115	1	10.6932	10.8307	10.9777	9.26353	9.08248	9.12508	9.18031	9.24901	9.38868	9.30445	9.13355	8.99007	9.08833	9.33945	9.116	9.33542	9.53728	8.83133	9.11888	9.0244	9.0732	8.77368	8.95123	9.00887	8.47527	9.17977	9.08052	8.88085	9.22373	9.11342	9.3508	9.37878	9.51668
Stk4	NM_021420	1	9.7864	10.0733	10.1534	7.68608	7.49539	7.88924	7.94167	8.14086	7.93242	8.16317	8.00618	7.65628	7.93438	8.4905	8.44275	8.73385	8.65192	8.22321	7.89405	8.32656	7.95478	7.88908	8.33564	7.93129	6.65794	7.98275	8.06821	7.83868	8.48342	8.33949	8.24447	8.86148	8.54415
Stmn1	NM_019641	1	11.1794	11.32	10.8965	9.53851	9.32183	9.3797	9.2217	9.41262	9.21204	9.55791	9.94842	9.46097	9.9738	8.30676	8.7506	7.88089	9.32822	8.91635	9.17324	9.61587	9.0554	8.70036	9.95696	10.1174	9.49775	9.26155	9.37414	8.35749	9.0742	8.76658	9.52005	9.17135	7.50549
Stom	NM_013515	1	11.2195	10.6784	10.9009	8.12634	8.63248	8.01931	8.22827	8.58507	8.55666	7.39512	7.69455	7.93435	8.02341	9.06608	8.90803	8.9382	8.8795	8.61101	8.3366	8.12015	8.50644	8.54149	8.28976	7.8707	8.29968	8.96871	8.47894	8.26343	8.24587	8.44125	8.97077	8.42012	7.6841
Stx11	NM_029075	1	8.39131	8.62666	8.73434	5.83719	5.64386	5.70135	5.82665	5.78709	5.77299	5.81322	5.77802	5.82265	5.64386	6.47099	6.37688	7.22241	6.29715	5.88792	5.76208	6.00596	6.43159	6.41349	5.90961	5.90783	5.99084	6.57139	6.29644	6.11316	6.79608	6.32975	6.3927	6.38255	6.61316
Stx7	NM_016797	1	10.258	10.8852	10.8488	9.33734	8.83336	9.17161	9.41963	9.41262	9.2624	9.34646	8.99574	8.78421	9.38561	9.70175	9.72908	10.0682	9.78217	8.46814	9.24098	9.24394	8.98194	9.25542	8.8704	8.71923	7.92913	9.3556	8.74682	8.75319	9.90367	9.60816	9.41612	9.66285	9.11086
Stxbp6	NM_144552	1	8.39131	8.82721	8.75389	7.5684	7.4715	7.33844	7.53195	7.67219	7.81735	6.81092	6.98583	7.4404	7.60004	7.08764	7.40947	7.34245	7.45948	6.0966	7.56049	7.08309	6.48575	6.21719	5.98832	6.13091	6.44933	6.62732	6.51726	6.28714	5.99059	6.44624	6.60366	6.56342	6.92887
Sun2	NM_001205346	1	10.8547	10.56	10.287	8.68045	9.52125	8.61333	9.05768	9.00705	8.73764	8.60515	7.92173	9.18662	8.07637	8.74307	8.88926	9.37349	8.97291	8.74099	8.34609	8.94311	8.24901	8.76472	8.46515	8.0635	8.64411	8.65569	8.83981	8.72322	8.17982	8.73257	8.91537	8.72566	9.01394
Tacc3	NM_001310541	1	10.4147	10.1177	9.81163	7.99059	8.15078	7.493	7.70536	7.9099	7.57325	7.76917	7.6339	7.4404	8.37589	7.55172	8.01671	7.65222	8.01711	6.71832	7.85468	8.78881	7.50833	7.88908	8.59659	7.97032	7.00193	8.04566	7.72245	7.35628	7.55539	8.38398	9.09065	9.03242	7.98614
Taf1b	NM_020614	1	7.57335	8.11565	8.24708	6.48274	6.41912	6.05024	6.60401	6.39103	6.45042	6.34232	6.06727	6.48514	6.40992	6.83937	6.98365	7.18007	7.08654	6.44069	6.39505	7.15704	7.0858	6.84627	6.06296	6.54696	5.99084	6.57139	6.47572	6.36685	6.35219	6.99751	7.21223	7.06159	7.0641
Taf6	NM_009315	1	9.2684	9.01894	9.16763	8.08884	7.08718	7.86427	8.01883	7.87825	7.77173	7.70603	7.19219	7.31152	8.28879	8.36438	8.10609	8.21033	8.19682	6.0966	7.81419	7.96408	8.18498	7.88908	8.20988	8.21741	7.00193	7.80018	7.80862	7.49282	7.13504	8.14638	8.65624	8.20543	7.76574
Taldo1	NM_011528	1	13.5209	13.1772	13.5917	11.7366	11.2506	11.7609	11.6304	12.0296	11.5555	11.8482	11.5064	11.1702	12.266	11.9258	12.0041	11.6816	11.8234	12.1332	11.7854	11.9298	11.5626	11.5282	12.8029	11.7897	10.8623	11.7624	11.4821	11.1387	11.6597	12.0907	12.6087	12.079	11.5195
Tbc1d10b	NM_144522	1	10.1391	10.0197	10.083	8.10771	7.58722	8.53641	8.05592	8.29264	7.83225	8.16317	7.42478	7.802	8.56568	8.94541	8.79832	9.0831	8.58894	8.57659	8.1101	8.32656	7.79238	8.06002	8.46515	7.49594	7.27948	8.00402	7.96691	7.80091	7.70377	8.54938	8.66298	8.43181	8.23576
Tbc1d31	NM_001081396	1	8.26071	8.31954	8.42841	6.26465	6.46826	6.05024	6.32896	6.2984	6.02713	6.449	5.98643	6.05511	6.47448	6.94386	7.11865	7.79933	6.99234	5.64386	6.19936	6.42058	6.68408	6.41349	6.4991	7.02586	6.20537	6.02312	6.70873	6.66893	6.76638	6.70192	7.15597	7.09137	6.61316
Tcf19	NM_001163763	1	9.13183	9.1459	8.63939	7.08784	6.81066	6.82066	6.55304	7.27038	6.71436	6.99827	7.36207	6.75118	7.38172	6.89256	7.44417	6.72991	7.9181	6.44069	7.03482	7.47883	7.28219	6.6264	7.17383	7.02586	7.03969	6.96773	6.99998	6.71026	6.08984	7.75291	7.80663	7.6269	7.18774
Tcof1	NM_011552	1	10.8028	10.1572	10.4009	8.44104	8.47311	8.80261	8.42536	8.32822	7.89034	8.52205	8.35648	8.0996	8.9589	8.43779	8.14879	8.87325	8.54537	9.47889	8.27827	9.22686	8.90454	8.78259	9.50027	8.81882	8.40469	8.83261	8.75553	8.33124	8.44645	8.86403	8.96533	9.34827	8.7183
Thap11	NM_021513	1	9.67114	9.65299	10.0008	7.74754	7.39732	7.35645	7.88096	8.0009	7.99994	7.44754	7.35135	7.76966	8.05542	8.30676	8.39921	8.31186	8.03298	7.40777	7.78656	7.87922	7.85544	7.88908	7.03239	7.26435	7.3107	7.72529	7.70457	7.3432	8.01283	7.90313	7.94585	7.86964	7.0641
Thoc6	NM_001008425	1	9.26272	9.28871	9.22947	7.80648	7.67355	7.493	7.79583	7.63479	7.18955	7.52275	7.35135	7.23462	8.06593	8.59046	8.33595	8.23121	7.93508	7.242	7.52748	7.29448	7.21965	7.53564	8.19336	7.13293	6.79671	7.89435	7.36105	7.46894	7.37037	8.03918	8.31466	7.85235	7.76574
Tiam1	NM_001145886	1	9.2106	9.20884	9.3797	6.45353	6.1447	6.29405	6.74693	6.4352	6.43099	6.34232	6.43541	6.05511	6.50573	6.72671	6.7261	6.89607	6.62474	6.83937	6.11299	6.64279	6.63699	6.16364	6.60281	6.91019	5.82774	6.57139	6.81249	5.95021	6.04107	6.44624	6.68542	6.96837	6.77963
Tiam2	NM_001122998	1	8.35975	8.58508	8.50735	6.53944	6.41912	6.68469	6.70084	6.9124	6.80775	6.28586	6.84004	6.45833	6.93083	6.47099	6.57775	6.07202	6.44674	7.05469	6.35797	6.83531	6.37533	5.86129	6.38735	6.13091	6.44933	6.32315	6.29644	6.11316	6.08984	5.9893	6.81215	6.52028	5.64386
Ticam2	NM_173394	1	8.66533	8.53137	8.42841	5.96687	6.01843	6.09383	6.20238	5.97838	5.77299	5.81322	5.84069	5.90436	5.8032	7.79464	7.28101	7.55617	7.31128	6.58616	5.92303	6.00596	5.82281	5.79239	6.55189	5.73731	5.64386	6.02312	6.03562	6.36685	6.60798	6.2678	6.48691	6.56342	6.20842
Tk1	NM_001271729	1	9.64083	9.28222	8.9921	8.21603	8.3605	7.73253	7.14133	8.19324	7.26833	8.17875	8.16769	7.53324	8.8167	7.21839	7.95789	7.95809	8.23846	7.81446	7.80044	8.66752	7.85544	7.71387	8.43736	8.70774	8.59423	7.84803	8.02567	7.58459	7.79483	8.05761	8.92101	8.63757	8.23576
Tle3	NM_001083928	1	10.0096	9.63273	9.74478	8.03069	7.08718	7.77334	8.10981	7.97119	7.67589	7.74843	7.76087	7.65628	7.99066	9.18811	8.77125	9.32574	8.50044	8.26703	7.91972	8.66752	7.83472	8.30228	8.30522	8.13394	7.34126	8.4846	8.22687	7.80091	7.92148	8.32435	8.74153	8.62744	8.39818
Tlr2	NM_011905	1	9.61877	9.85453	9.60101	6.81678	6.81066	7.01465	7.03391	7.11609	7.06897	7.16406	6.60749	7.52034	6.81093	9.16668	8.59719	9.59108	8.96466	7.242	7.63985	7.35858	6.93825	7.0954	6.4991	6.43981	6.20537	6.68114	7.31468	7.78165	6.88166	7.21014	7.19372	7.60642	7.50549
Tmcc1	NM_177412	1	9.39315	9.60699	9.92524	7.45507	7.65244	7.16531	7.79583	7.5964	7.48174	7.68435	7.26256	7.46754	7.68436	8.65345	8.24048	8.65875	8.33118	7.81446	7.52748	7.41995	7.50833	7.28287	7.44898	6.82759	7.59056	7.91696	7.2422	7.70194	7.76511	8.0016	7.80663	8.04728	8.0527
Tmem109	NM_134142	1	11.3762	11.3498	11.4328	9.21649	8.76619	9.12508	9.19701	9.33896	9.06846	8.91537	8.62037	8.92303	9.54068	9.63308	9.68624	9.84252	9.83288	8.80184	8.9234	8.98433	9.33159	9.07863	9.06457	8.31159	7.68889	8.87942	9.09431	8.72322	7.92148	9.46363	9.81162	9.61239	8.75874
Tmem165	NM_011626	1	9.35631	10.1643	10.1262	8.51359	8.02506	8.22939	8.52129	8.49403	8.39551	8.23947	8.25082	7.95367	8.74653	8.41978	8.7916	8.1011	8.80756	6.83937	8.31742	8.69261	8.42563	8.26463	7.55623	8.08143	7.82486	8.37454	8.16287	7.98057	8.12238	8.44125	8.79776	8.50001	7.6841
Tmem185b	NM_146103	1	7.80971	8.20069	8.50735	6.88401	6.36826	6.33095	7.55804	7.11609	6.82274	6.99827	6.23999	7.13656	6.86009	7.25947	7.07504	7.13646	6.66602	6.44069	6.72121	7.29448	6.77386	7.25754	6.4991	6.1982	5.82774	7.20672	7.02899	6.49063	7.26813	6.95882	7.03644	6.8339	7.18774
Tmem38b	NM_028053	1	9.57821	9.51589	9.93098	7.67346	7.08718	7.79991	7.77374	7.72652	7.97331	7.47305	7.19219	7.10234	8.10725	7.41298	7.47805	7.68287	7.50568	6.95104	7.63985	7.41995	7.0858	7.65687	7.93971	7.35561	7.11236	7.34655	7.08532	6.36685	7.75002	6.79274	7.51022	7.33488	6.92887
Tmem43	NM_028766	1	9.52704	9.51035	9.57192	7.85196	7.5648	7.52521	8.22827	7.9099	8.12011	7.54697	8.16157	7.32642	7.91124	8.30676	7.72378	7.77108	7.75554	8.22321	8.1101	7.83484	7.83472	7.82153	7.27149	7.13293	7.53877	7.91696	7.68648	7.75227	7.40932	7.84066	7.59729	7.49942	7.30162
Tmem50b	NM_030018	1	10.1668	10.6023	10.6682	9.76343	9.03435	9.35303	9.51593	9.65604	9.41117	9.57568	9.40643	8.46541	9.51788	9.74578	9.86333	9.87606	9.84191	8.70958	9.72507	9.1921	9.09077	9.15608	9.23567	8.70774	7.61578	9.24377	8.59019	8.43966	9.46466	9.52452	9.36741	9.24607	8.98013
Tmpo	NM_001080129	1	11.3186	11.939	11.6846	9.3253	8.97609	8.62824	8.75349	8.9549	8.71371	9.24646	9.02303	8.56928	8.9589	8.86784	8.78485	8.76283	9.45726	8.77174	8.95478	9.91129	9.37528	8.73748	9.01842	8.89178	8.43334	9.37206	8.74682	8.67706	8.639	9.3635	9.81767	9.79993	8.5897
Tnfrsf21	NM_178589	1	9.01513	9.30801	9.27079	8.08884	7.83211	7.78668	7.88096	7.97119	7.66762	7.86863	7.56131	7.73657	8.10725	8.30676	8.30796	8.51287	8.35661	8.39102	7.91972	7.47883	7.37119	7.7687	7.58184	7.67198	6.44933	7.56272	7.75753	7.20546	7.75002	8.29358	7.55441	7.64709	8.11634
Tnfsf13	NM_023517	1	9.67542	9.69268	10.344	9.16786	8.84271	9.61861	8.93365	9.10602	8.84435	8.81919	8.16157	9.04516	9.04646	10.0032	10.0607	9.27635	9.84191	8.30955	8.7266	7.53538	8.0296	8.08904	7.47655	7.54847	6.79671	8.16382	8.06821	7.96358	7.75002	7.92338	8.5799	8.40834	7.6841
Tnfsf14	NM_019418	1	7.66228	7.61444	7.80981	5.79121	5.64386	5.64386	5.64386	5.64386	5.64386	5.73102	5.64386	5.64386	5.69894	6.6045	6.60866	6.99708	6.13023	5.64386	5.76208	5.64386	6.43159	5.86129	5.90961	5.64386	5.9116	5.84592	6.03562	6.01763	5.70775	6.20304	6.02505	6.05998	5.95359
Tnfsfm13	NM_001159503	1	9.67542	9.69756	10.344	9.17235	8.86122	9.61488	8.93365	9.10602	8.84802	8.81919	8.17379	9.04966	9.05177	10.0213	10.0801	9.30619	9.85535	8.30955	8.74107	7.53538	8.04771	8.08904	7.58184	7.59915	6.79671	8.16382	8.06821	7.9721	7.75002	7.92338	8.5799	8.42012	7.6841
Top2a	NM_011623	1	12.2574	12.2022	11.7181	9.53502	9.65459	8.19977	8.50797	9.19222	8.49715	9.55194	8.85481	8.5567	9.32998	8.16263	8.45131	8.12362	8.88825	8.88856	9.50959	10.4492	9.65478	9.31803	9.60391	9.5236	8.92196	9.52708	9.07358	8.24245	8.76447	9.44975	10.3478	10.2594	9.07927
Tor1a	NM_144884	1	10.2321	10.4014	10.4112	8.41854	7.65244	8.17967	8.30729	8.64273	8.68937	8.45962	7.62502	7.88487	8.55079	9.17743	8.99835	9.24589	9.06835	7.75415	8.24819	8.616	8.08328	8.17274	9.15265	7.93129	8.04506	8.30766	8.0959	7.76213	8.4276	8.76658	9.18268	8.76315	8.39818
Tpm4	NM_001001491	1	9.60089	11.1126	10.937	9.47815	8.81449	8.47177	9.58733	9.25518	8.8184	9.20139	8.88857	8.90825	9.67038	10.0682	10.0966	10.0448	10.0704	7.87235	9.18387	9.58939	9.24003	8.87712	8.17665	8.92195	8.61939	9.51971	9.13491	8.90331	8.8519	9.94652	10.2003	9.63279	9.2871
Traf3ip3	NM_153137	1	7.9292	7.75229	8.11216	5.64386	5.72697	5.70135	5.64386	5.78709	5.70987	5.81322	5.64386	5.82265	5.64386	6.07045	6.26489	6.32612	5.87261	5.64386	5.81775	6.74225	6.37533	6.10804	6.32805	6.26251	6.50438	6.51322	6.03562	6.14366	6.13701	6.38917	6.45618	6.42993	6.42494
Trem3	NM_021407	1	8.37035	8.54227	8.65334	5.74376	5.72697	6.13617	5.73815	5.71727	5.64386	5.96475	5.67858	5.69067	5.64386	5.76291	5.81268	5.76339	5.72421	6.0966	6.19936	6.74225	6.48575	7.0954	6.4991	6.32405	5.64386	6.25378	5.97728	5.80516	6.82518	5.91037	5.8936	5.99842	5.95359
Treml2	NM_001033405	1	8.83559	9.09497	8.83571	5.74376	5.64386	5.86131	5.73815	5.64386	5.77299	5.81322	5.64386	5.69067	5.64386	6.15995	5.75857	6.16179	5.94146	5.64386	5.76208	7.00512	6.25575	6.10804	6.32805	5.73731	6.06596	6.18092	6.34339	6.05018	5.88401	5.82688	5.98256	6.119	6.20842
Trio	NM_001081302	1	10.1173	10.0197	10.307	8.52065	8.10491	8.31479	8.3822	8.35146	8.45927	8.22453	8.21578	8.00087	8.72014	9.27079	8.75752	9.26627	8.92271	8.39102	8.28816	8.08269	8.08328	7.96929	8.98041	7.89118	7.45741	8.30766	8.13645	8.2068	7.6397	8.83227	8.46113	8.72566	8.29195
Troap	NM_030159	1	8.63049	8.63687	8.63939	6.56697	6.51576	6.53454	6.70084	6.5197	6.15111	6.28586	6.21655	6.28609	6.68014	6.15995	6.4808	6.40175	6.39857	5.88792	6.24068	6.74225	5.9046	6.41349	6.87555	6.73998	6.33251	6.73304	6.03562	6.11316	6.26993	6.44624	7.15597	6.6856	6.20842
Tsc22d4	NM_023910	1	11.5874	11.5291	11.4952	9.87228	9.38716	10.1929	9.64931	9.97314	9.89183	9.46562	9.19481	9.13677	9.87858	10.074	9.94737	10.3987	10.1562	10.3783	9.6233	9.72931	9.67823	9.69827	10.5503	9.28907	9.34025	9.45165	9.35708	9.52375	9.6949	10.056	10.0045	10.0172	9.73511
Tspan14	NM_145928	1	9.74221	9.69268	9.93098	8.01078	7.44719	8.09637	8.03749	8.02999	7.57325	7.68435	7.48489	7.66803	8.04483	8.95794	9.02151	8.92544	8.789	7.98159	7.84131	8.08269	7.99267	8.0746	8.69375	8.0635	6.92332	8.29044	7.99659	7.76213	8.24587	8.87447	8.63582	8.71613	8.29195
Tspan17	NM_028841	1	8.49179	8.62666	8.64638	7.52694	7.23645	7.94982	7.45073	7.89416	7.44345	7.31275	7.1433	7.3987	8.06593	8.28703	8.14879	7.71287	8.10976	6.44069	7.45911	7.35858	7.25126	7.44876	7.607	6.78445	7.21493	7.37948	7.49183	7.39482	6.22697	7.5852	8.15163	7.45429	6.77963
Tspan5	NM_019571	1	8.44243	8.52038	8.5967	6.92714	6.84826	6.96854	6.74693	6.88081	6.90957	6.54834	6.72845	6.58765	7.14435	7.25947	7.44417	6.94746	7.52824	5.88792	6.39505	6.74225	7.05031	7.20549	6.99475	6.78445	7.21493	7.31284	7.13953	7.20546	6.50386	7.10773	7.38531	7.28421	6.77963
Tspo	NM_009775	1	13.2689	13.1675	13.1947	11.4973	11.186	11.7541	11.5186	11.7127	11.6883	11.0983	11.3502	11.5075	11.9298	12.2257	12.3118	11.8173	12.1978	11.3662	11.3962	10.7652	10.0276	10.2636	10.7386	10.21	10.7557	10.4032	10.3564	10.2311	10.3084	11.1104	11.1681	10.9559	10.5264
Ttc39c	NM_028341	1	8.01274	8.20069	8.1908	6.12344	6.08296	6.21727	6.26707	6.0369	6.26527	6.16585	5.77802	6.05511	6.11815	6.78414	6.95987	7.18007	6.92593	5.64386	6.11299	6.92271	6.31678	6.26883	6.60281	6.59768	7.18155	6.92376	6.77872	6.49063	6.73606	6.70192	6.90608	6.64602	6.20842
Ttc7	NM_028639	1	10.879	10.4192	10.8335	8.25041	8.53207	8.91019	8.57338	8.65211	8.45446	8.31194	8.13681	8.03756	8.65894	9.08905	8.84451	9.15044	8.789	8.80184	8.47287	8.74151	8.36913	8.08904	9.10045	7.89118	7.37118	8.37454	8.13645	8.11745	8.44645	8.73257	8.86947	8.81761	8.54415
Ttf2	NM_001013026	1	8.11709	8.22796	8.14215	6.88401	6.60635	6.09383	6.70084	6.47807	6.46961	6.54834	6.69491	6.37478	6.56624	6.6045	6.75403	6.54209	7.11662	6.0966	6.91233	6.53596	6.31678	6.66545	6.91639	6.13091	6.84016	6.83155	6.63516	6.51415	6.73606	7.07192	6.97274	7.12055	6.61316
Tuba1b	NM_011654	1	13.3743	13.0569	12.6671	10.7974	10.7374	10.0943	10.4624	10.2852	9.92868	10.8483	10.9169	10.3444	10.8259	11.1064	11.2852	11.4181	11.1841	11.0397	10.7023	11.8815	11.1644	10.9593	12.0104	11.137	10.4364	11.3433	11.0706	10.3985	10.9799	11.3158	11.8098	11.8203	10.9143
Tuba4a	NM_001313723	1	11.7706	11.7673	11.4135	10.1815	9.66516	9.79739	10.1514	9.98062	9.18328	9.66139	10.1177	9.79143	10.4973	9.46767	9.68624	9.07157	10.0116	9.93785	9.96276	8.98433	8.70212	8.70973	8.82823	9.18509	9.10228	9.27911	9.26254	8.55759	8.74176	9.32598	10.2988	9.91265	8.87368
Tubb5	NM_011655	1	12.9763	12.7703	12.5025	10.5177	10.2816	9.97112	10.3133	10.5691	9.69403	10.377	9.84902	9.58077	11.1439	10.8482	10.9304	10.9611	10.9304	10.055	10.2064	11.3852	10.7123	10.4926	11.7753	10.851	10.0583	10.7471	10.6006	9.67754	10.2824	10.658	11.6762	11.0929	10.2847
Tusc1	NM_026954	1	9.77847	9.98413	10.3332	7.16194	6.41912	6.7678	7.14133	7.45336	7.26833	6.7286	6.57099	6.91787	7.16406	7.37611	7.13998	7.09148	7.08654	6.0966	6.72121	6.53596	6.31678	6.50246	6.4991	6.59768	5.82774	6.32315	6.74415	6.6478	6.46741	6.91905	7.03644	6.8339	6.61316
Tyk2	NM_001205312	1	10.0163	9.73131	9.97052	7.29962	7.31913	8.11765	7.47832	7.24579	7.58208	7.52275	7.11822	7.48092	7.94581	8.79986	8.67228	8.84642	8.56732	7.242	7.60862	7.92227	8.0296	7.78652	8.43736	7.69546	7.07647	7.87138	7.68648	7.81992	7.78005	8.49632	8.40592	8.47764	8.17728
Ube2q1	NM_027315	1	10.2751	10.656	10.6595	9.23806	8.49699	8.85424	9.19701	9.17278	9.13605	9.23904	8.63812	8.74593	9.32998	9.55275	9.4029	9.69246	9.29573	8.26703	9.3769	8.87899	9.09077	9.07863	9.51364	8.66079	8.15235	8.99019	8.46839	8.58562	8.86597	9.13093	9.47095	9.17831	8.91005
Unc119	NM_001313985	1	10.111	10.1286	10.518	8.99112	9.39353	9.79078	9.22983	9.60377	9.36838	8.40765	8.37248	9.07635	9.18315	9.42317	9.33519	8.80523	9.37875	7.98159	8.42886	7.53538	7.50833	7.17874	8.32051	7.35561	6.96315	7.56272	7.31468	7.36925	8.14563	8.07581	8.02126	7.6269	7.6841
Upb1	NM_133995	1	8.33833	8.62666	7.92931	6.92714	6.88492	6.71293	6.87696	7.16938	6.63163	6.34232	6.21655	6.85761	7.24032	6.5393	6.78143	6.47362	7.28502	6.27888	6.59944	6.00596	6.19204	6.10804	5.98832	6.38308	6.39209	6.18092	5.853	6.14366	5.93829	6.13525	6.57534	6.23026	6.61316
Usb1	NM_133954	1	8.89551	8.5531	9.18214	7.34804	7.05538	7.16531	7.20875	7.11609	7.60828	6.92622	6.91477	7.31152	7.5708	8.16263	8.10609	7.62091	8.03298	6.27888	7.45911	7.47883	7.31247	7.44876	7.81568	6.73998	6.65794	7.13137	6.90927	6.9361	7.3505	7.5852	8.0728	7.66701	7.30162
Usp25	NM_013918	1	9.73813	10.039	10.1559	8.04055	7.81321	7.81301	8.21193	8.08649	8.45927	8.17875	7.59806	7.84403	8.13748	8.45557	8.67958	8.84642	8.66216	8.03326	8.20709	8.29414	8.21735	8.13149	7.7035	7.89118	7.3107	8.43845	8.02567	8.28411	8.45578	8.88482	8.71582	8.71613	8.5897
Utp14a	NM_028276	1	8.98096	8.96324	9.12821	7.9176	6.92065	7.46005	7.79583	7.69053	7.81735	7.6173	7.27396	7.54602	7.85171	7.97808	8.07322	7.77108	7.63602	7.48402	7.70033	7.83484	7.65733	7.61758	7.10484	8.00832	7.59056	7.56272	7.49183	7.35628	7.42841	7.30574	7.9678	7.45429	6.92887
Vcan	NM_001081249	1	8.82792	9.1812	9.87849	6.45353	6.51576	6.36695	5.98884	5.71727	5.74176	5.89098	6.16848	6.25527	6.5363	6.99339	6.63893	5.87376	6.24363	5.64386	5.87135	6.53596	6.05546	5.72003	5.98832	5.64386	5.9116	5.93723	5.7866	5.98432	5.70775	6.2678	5.84699	6.119	5.95359
Vcl	NM_009502	1	8.59478	9.31438	9.28877	8.41096	7.95784	8.20971	8.14466	7.87825	8.14419	7.86863	7.97159	7.93435	8.05542	7.84947	7.76553	7.09148	7.88353	7.242	8.19663	7.64225	8.10074	7.44876	6.99475	7.38479	7.86748	8.21945	8.1759	7.9202	6.96246	8.54938	8.3816	8.19175	7.76574
Vim	NM_011701	1	14.8558	15.0091	15.0256	10.6394	11.1712	11.455	11.8718	10.8456	10.8331	10.9831	10.9965	11.3313	11.207	13.4342	13.2392	13.8092	12.9704	10.8146	10.8481	12.2224	11.485	11.7724	11.6493	10.9471	11.1695	11.9807	11.6962	11.2971	12.5615	11.5404	11.7814	11.4978	11.5076
Vrk2	NM_027260	1	9.05509	9.24266	9.16763	6.74627	6.81066	6.43635	6.91783	7.16938	6.7926	6.85039	6.23999	6.431	6.73388	7.41298	7.30008	7.82703	7.23105	7.48402	6.91233	7.41995	6.53795	6.74052	7.58184	6.49437	6.13734	6.96773	6.19769	6.5601	7.3099	7.14268	7.17498	7.06159	7.18774
Vwa5a	NM_001145957	1	9.18081	9.68778	9.6883	8.14473	8.15078	8.01931	8.48096	8.2438	8.29158	8.13148	7.49466	7.81263	8.25242	8.92002	8.7644	9.29631	8.89694	7.81446	8.55705	8.41964	8.31032	7.87248	7.58184	8.08143	7.00193	8.39078	7.63079	7.94638	8.55465	8.64997	8.30608	8.75387	8.29195
Wdhd1	NM_172598	1	8.14205	8.30681	8.06074	6.45353	6.31553	6.46982	6.60401	6.747	6.57962	6.92622	7.10552	6.5627	7.04154	6.89256	6.91109	6.94746	7.57232	6.0966	6.43119	7.29448	6.68408	6.31868	6.99475	7.44143	7.03969	6.83155	6.51726	6.23145	6.13701	7.14268	7.36891	7.64709	6.77963
Wdr1	NM_011715	1	10.9828	10.7005	10.9929	9.74848	9.29484	10.2348	9.89934	9.99544	9.83195	9.47196	9.40902	9.26992	10.3458	10.0272	10.1554	10.0798	9.96689	10.1162	9.49686	9.46388	8.91444	9.43565	10.0699	9.34952	7.88832	9.55618	9.09431	8.99396	9.28784	9.7223	10.3053	9.85305	9.46873
Wdr26	NM_145514	1	11.81	11.9917	11.9112	10.0438	9.7815	9.82028	9.93958	10.0883	10.5643	9.94275	9.59095	9.45759	9.8756	10.3975	10.1343	11.287	10.6458	9.46013	10.101	9.98422	9.93821	9.82872	10.0286	9.39326	9.63974	9.90621	9.50895	9.70336	10.1819	10.4152	10.1045	10.4525	9.97712
Yeats4	NM_026570	1	9.89314	9.98413	10.2484	8.40334	7.95784	8.4041	8.67222	8.68907	8.48306	8.40765	8.26232	8.00087	8.8475	8.98268	8.93877	9.00035	9.06835	8.30955	8.42886	8.19228	8.0296	8.06002	9.32937	8.73065	7.88832	8.32467	8.34693	7.77193	8.47427	8.62547	9.05521	8.65761	8.87368
Zbtb34	NM_001276332	1	8.43235	7.99384	8.28343	6.3304	6.1447	6.21727	6.5002	6.5197	6.30852	6.449	6.69491	6.45833	6.68014	6.72671	7.13998	7.34245	6.85633	5.64386	6.24068	6.42058	6.93825	6.87987	7.36297	7.06243	6.50438	6.73304	6.43294	6.78953	6.93603	7.10773	6.88317	6.79823	6.42494
Zc3h4	NM_198631	1	10.0431	9.04217	9.4292	7.95976	7.90529	7.90155	7.98076	7.89416	7.79472	7.88772	7.6339	7.42663	8.14741	8.9949	8.87662	8.56315	8.50044	8.39102	7.81419	8.22704	8.15187	7.65687	8.19336	7.52245	6.7057	8.04566	7.93661	7.86637	7.98732	8.48275	8.86947	8.31045	8.44849
Zcchc8	NM_027494	1	9.29645	9.42456	9.46128	8.01078	7.23645	7.97335	7.88096	8.11392	7.65091	7.52275	7.54258	7.4404	8.23389	7.87613	8.2206	8.14579	7.98486	7.242	7.82781	8.32656	7.95478	7.82153	8.14264	7.98944	7.07647	7.80018	8.02567	7.41995	7.5897	8.02051	8.48416	8.19175	7.6841
Zfp414	NM_026712	1	9.9683	9.95587	9.9733	8.06971	7.73507	7.77334	7.70536	8.3046	8.28076	8.06593	7.65149	7.82317	8.16708	8.71381	8.67958	8.47834	8.58894	7.15138	7.71506	8.15667	7.91586	8.27729	8.12533	7.74131	7.5649	7.61897	8.25169	7.59566	7.92148	8.33949	8.67637	8.53294	8.11634
Zfp710	NM_175433	1	11.2756	10.8351	10.9526	8.38025	7.97495	8.45515	8.74215	8.26843	8.10179	8.58189	7.46513	7.74768	8.31548	9.26071	9.16362	9.67731	9.25573	7.928	8.37421	8.69261	8.41171	8.57264	8.94137	8.0635	7.4005	8.23753	8.13645	8.13273	8.35962	9.0504	9.13012	9.32966	8.34604
Znrf1	NM_133206	1	10.1078	10.2332	10.318	8.23332	7.94054	8.4041	8.42536	8.36294	8.5111	8.25426	7.74457	7.98218	8.2616	9.2808	8.85099	9.0831	9.18651	7.98159	8.04162	8.616	8.67906	8.80024	8.75131	8.23354	7.98825	8.77189	9.09431	8.60766	8.3396	8.76658	9.02935	8.69689	8.7183
Zyx	NM_011777	1	12.4853	12.1045	12.6658	9.29268	8.89755	9.4102	9.56821	9.35054	8.78434	8.85843	8.54238	9.33768	9.6841	10.3743	10.3532	10.6088	10.3711	9.63754	9.14632	8.94311	8.76916	9.29331	9.19476	8.80809	9.20555	8.99019	9.36848	9.11046	9.24541	9.48421	9.98577	9.58125	9.34137
Egln3	NM_028133	2	5.83958	5.64386	5.85175	8.01078	8.12036	8.23914	7.70536	8.15413	8.72173	8.17875	7.58896	7.82317	8.21512	7.37611	7.51115	6.99708	7.57232	7.40777	8.38347	6.83531	6.77386	6.70347	6.38735	6.49437	6.13734	7.53375	6.94014	7.26215	6.08984	7.68341	7.76963	6.76166	7.40715
Gucy2c	NM_145067	2	5.7121	5.64386	5.75154	10.1271	9.39988	9.95938	9.67338	10.169	10.1706	9.94731	9.55635	9.56829	9.9399	8.9949	9.174	8.05499	9.22844	9.34218	9.9933	9.24394	8.45307	7.69512	8.38011	9.09084	7.92913	9.49738	8.76418	8.16281	7.3099	8.24616	9.56034	8.99352	7.6841
Jup	NM_010593	2	6.26001	5.86842	6.50286	10.3375	9.757	10.4282	10.5132	10.7679	10.6779	10.0902	9.66426	9.80213	11.0196	10.3364	10.3348	9.63092	10.3106	10.8439	9.94099	9.0045	8.90454	9.249	9.10928	8.97088	8.0997	9.24377	9.28676	8.65076	8.53717	9.38555	10.8675	9.9251	9.04698
Lrp6	NM_008514	2	6.6211	6.65142	6.78221	8.27566	8.23836	8.13862	8.24442	8.2438	8.10179	8.13148	7.89244	7.93435	7.83951	7.97808	8.23057	8.73385	8.41829	8.70958	8.19663	7.83484	7.79238	7.93774	8.6091	8.04534	7.21493	7.96115	7.75753	7.59566	8.29869	8.26214	7.83079	8.23241	7.84301
Mecom	NM_007963	2	5.64386	5.64386	5.64386	8.7838	8.13565	8.60582	8.29182	8.35146	8.52033	8.59357	8.9288	8.27114	8.62378	7.37611	7.83254	6.66998	8.07954	6.95104	8.24819	7.47883	7.37119	7.53564	7.03239	7.20013	6.92332	7.34655	7.42792	6.95342	6.60798	7.21014	7.09744	7.06159	6.92887
Nr5a2	NM_030676	2	5.64386	5.64386	5.64386	7.78319	7.83211	7.88924	7.77374	7.40975	7.57325	7.84927	7.58896	7.45403	7.44754	6.72671	6.54615	6.40175	7.7363	7.75415	7.94493	6.64279	6.53795	6.84627	6.38735	7.32583	6.88234	6.78313	7.38368	6.46671	6.13701	7.36613	7.24854	7.74402	7.18774
Pbx1	NM_001291508	2	6.69039	6.48056	7.10004	8.77202	8.18057	8.23914	8.32259	8.25617	8.49715	8.31194	8.51381	8.5567	8.71347	8.30676	8.18	7.68287	8.33118	7.40777	8.21748	8.04422	7.99267	7.57719	7.33311	7.64811	8.40469	8.08613	8.18881	7.67087	7.79483	8.57519	8.86947	8.53294	7.18774
Pla2g2a	NR_002926	2	5.64386	5.64386	5.64386	8.485	8.41164	8.27746	8.01883	8.52502	8.45446	8.77884	8.05986	8.31663	8.8475	7.04129	7.54351	7.18007	7.33706	7.75415	8.22779	8.26098	7.72644	7.67612	9.69474	8.67267	9.63358	9.21669	7.79179	8.61312	9.47847	7.45222	10.1698	10.0326	5.95359
Plcd1	NM_019676	2	6.0119	6.00079	6.15609	8.56228	8.555	8.78277	8.74215	8.40797	8.97088	8.36741	8.35648	8.32407	8.32426	7.76642	7.8713	7.34245	7.71679	7.69121	8.6366	7.53538	7.12045	7.65687	7.58184	6.98832	6.06596	7.89435	7.42792	7.38209	7.18078	7.30574	8.09292	7.49942	6.77963
Ptk2	NM_007982	2	5.77724	5.72266	5.85175	8.06971	7.755	8.26797	7.7513	7.67219	7.86159	7.66235	8.08597	7.74768	8.02341	7.44894	7.70959	7.26354	7.83006	7.242	7.54408	7.41995	7.77073	7.44876	7.10484	7.64811	7.53877	7.87138	8.22687	7.3432	7.40932	7.55957	8.46113	8.16399	7.0641
Sox9	NM_011448	2	5.64386	5.64386	5.64386	10.0657	9.64927	10.1878	9.80446	10.1292	9.87034	8.98794	9.23328	9.5398	9.98215	9.01902	8.8249	7.82703	8.94803	8.74099	9.71044	8.29414	7.87586	7.65687	8.57124	8.51004	7.75848	8.454	7.8417	7.70194	7.57265	7.81921	8.60813	8.47764	7.0641
Tead1	NM_009346	2	5.64386	5.64386	5.64386	7.29962	6.98959	7.26405	6.87696	7.1953	7.62548	7.6173	7.45515	7.01306	7.36478	6.99339	6.91109	6.24629	7.11662	7.05469	6.8335	7.78904	7.45502	7.20549	7.27149	6.91019	7.18155	7.53375	7.74009	7.20546	6.39163	7.33625	7.55441	7.60642	6.61316
Yap1	NM_009534	2	5.64386	5.64386	5.64386	8.09831	7.31913	7.87681	8.21193	8.05852	7.95301	7.82966	7.83971	7.88487	8.2616	7.84947	7.79271	6.84278	8.03298	7.242	7.98196	7.53538	7.83472	7.47098	7.39221	7.74131	7.64057	8.10595	8.13645	7.86637	6.73606	7.86178	8.38976	8.01657	7.30162
Cables1	NM_001146287	2	5.64386	6.00079	5.75154	7.10673	7.44719	7.52521	7.70536	7.92547	7.63401	7.10001	6.71177	7.34117	7.25877	7.95326	7.3918	6.94746	7.28502	7.69121	7.62432	6.53596	6.63699	6.81188	6.652	6.73998	6.39209	6.83155	6.70873	6.82759	6.31165	6.95882	7.44912	6.9027	6.77963
Ccnd1	NM_007631	2	5.95673	6.17903	6.37398	10.1201	9.66516	10.517	9.72034	9.87633	8.94371	9.81392	9.9905	9.79679	10.4973	10.7543	10.3758	10.4926	10.4471	9.53373	9.70307	10.661	10.1204	10.2249	11.1516	10.4737	9.75772	10.9306	10.1866	10.4588	10.2506	10.8709	11.6687	11.5061	9.71469
Ccnd2	NM_009829	2	6.11632	6.17903	5.69872	12.1261	11.4939	12.198	12.1251	11.7849	11.8057	11.8784	11.9835	11.8963	12.0591	11.199	11.2415	10.9422	11.9447	10.0674	11.3223	11.1152	11.3583	10.7841	11.0971	11.0934	10.878	11.1445	12.0171	11.1584	10.5541	11.7376	12.1791	12.3601	11.1223
Cd2ap	NM_009847	2	8.12962	8.39366	8.3276	10.3828	10.4098	9.93561	9.97874	10.0744	10.6933	10.205	9.77272	9.76159	9.54068	9.16668	9.36718	9.62303	9.84191	8.97036	10.4305	9.49273	9.33159	8.79144	8.90125	8.76434	9.20555	9.64012	9.25027	8.9515	9.05591	9.54425	9.2998	9.96988	8.34604
Cdkn2b	NM_007670	2	5.64386	5.64386	5.64386	9.0654	8.59978	9.09321	9.00176	9.23658	9.10878	8.96115	8.51381	8.7066	8.84139	8.34543	8.39921	7.62091	8.33118	9.12124	9.27121	8.35826	8.43942	8.22596	7.85822	7.89118	7.3107	8.62855	8.45776	8.40232	7.37037	7.61039	9.22431	8.40834	6.61316
Cenpv	NM_028448	2	6.72383	7.06835	6.75658	9.82174	9.1889	9.2556	9.22983	9.66534	9.39622	9.66139	9.24781	9.4474	10.162	9.15584	9.66066	8.07823	10.0076	8.61101	9.19967	9.50694	9.2712	8.69092	9.02777	9.91726	9.24649	9.18909	9.77607	9.03926	8.13405	9.37823	10.8469	10.0517	8.5897
Cgref1	NM_026770	2	5.64386	5.72266	5.64386	9.66812	9.13667	9.19683	8.79795	9.37342	8.58771	9.73704	10.0162	9.12829	9.7145	8.50765	9.09977	7.88089	8.79831	8.17801	9.13541	7.78904	7.97385	7.40328	7.33311	8.35647	8.28403	8.68233	8.28815	7.81045	7.24679	7.75291	9.37974	8.78153	7.40715
Dab2ip	NM_001001602	2	5.77724	5.79738	5.85175	8.98092	8.73642	9.19683	8.56053	8.76892	8.75728	8.23947	8.8586	8.65441	9.03045	8.57428	8.56602	7.68287	8.79831	8.13135	8.32704	8.00471	8.16852	8.64281	8.67007	8.2011	8.70412	8.84446	9.03119	8.29773	7.65598	8.4129	9.22431	8.75387	7.18774
Dst	NM_001276764	2	5.64386	5.64386	5.69872	8.80708	9.04248	9.28412	8.61124	8.96999	8.70159	8.88718	8.6986	9.03159	9.03581	9.14492	8.85744	8.74841	9.06063	9.56917	9.0274	8.19228	8.24901	8.90186	9.27545	8.78638	7.92913	8.58685	8.77278	8.49392	9.3936	8.57519	8.09292	8.33556	8.75874
Hepacam2	NM_178899	2	5.64386	5.64386	5.64386	8.43358	8.18057	7.6326	8.32259	8.28059	8.23666	8.20943	7.99933	8.46541	8.88955	7.82232	8.14879	7.26354	8.26556	6.95104	8.32704	7.08309	7.12045	6.54496	6.83352	6.86949	6.50438	6.73304	7.26677	6.60462	6.53941	7.61039	8.3232	7.35957	7.50549
Irf6	NM_016851	2	5.64386	5.64386	5.64386	8.93938	8.61076	8.21958	8.49453	8.57524	8.97088	8.68373	8.62928	8.63659	8.34167	7.73764	7.99347	7.04505	8.18267	8.08314	8.67478	8.32656	8.0656	7.47098	7.30263	8.37113	7.53877	8.10595	7.87403	7.45685	7.73476	7.96302	8.42984	8.33556	6.77963
Llgl2	NM_001252532	2	6.99431	6.2867	6.33987	9.85284	9.40619	9.50611	9.76581	9.97688	9.99306	9.43998	8.89228	9.46097	9.85149	8.98268	9.18942	8.68926	9.38494	8.70958	9.69566	7.53538	8.38346	7.9217	8.17665	8.21741	7.80307	8.62855	8.49982	7.62837	7.70377	8.45521	9.34662	8.86148	8.23576
Lzts2	NM_145503	2	5.83958	5.79738	5.75154	9.34928	8.70601	9.42735	9.21351	9.4291	9.55952	9.09861	8.84337	8.98069	9.39815	9.13392	9.1843	8.46076	9.35371	8.35086	9.045	8.44938	8.45307	8.33898	8.39464	8.63673	8.15235	8.66907	8.73807	8.37044	7.3099	8.46905	8.77304	8.33556	8.0527
Mapk13	NM_011950	2	6.34843	6.2867	6.30495	11.3206	11.2989	11.5304	11.3421	11.698	11.6985	10.841	11.0455	11.2642	11.5053	10.6267	10.855	9.9153	11.0638	11.0397	11.4007	10.389	10.3236	9.6009	10.5729	10.7923	10.7754	10.6627	10.7968	9.94326	9.65899	10.3077	11.8279	11.2823	9.60806
Misp	NM_030218	2	5.7121	5.64386	5.69872	10.9437	10.6734	10.6886	11.0749	11.0741	10.7395	10.1428	10.6512	10.746	10.8953	10.6578	10.5452	9.59913	10.5416	11.7982	11.0285	9.10135	9.27889	8.68143	9.54001	9.61879	8.56863	9.84267	9.28676	9.34503	8.11061	9.76217	11.2476	10.5788	8.5897
Nek6	NM_001159631	2	6.39067	6.06268	6.43986	9.05085	8.57756	8.70757	8.99222	9.12638	8.88062	9.20139	8.46988	8.36072	9.23998	8.84103	8.93267	8.76283	8.86185	8.08314	9.00959	8.74151	8.18498	8.3865	8.6091	8.58738	7.61578	8.57268	8.38108	7.84797	8.6714	8.57519	8.77926	8.59663	7.91635
Pard3b	NM_001081050	2	5.83958	5.72266	5.69872	8.53466	8.555	8.19977	8.10981	8.12745	8.52033	8.32601	7.95043	7.86459	7.92286	6.78414	7.26168	6.78745	7.75554	8.35086	8.13223	7.22739	7.21965	7.28287	6.74561	6.91019	6.55741	7.34655	7.2422	7.21985	6.53941	7.03519	6.83621	7.09137	6.42494
Plk3	NM_013807	2	7.26805	7.36708	6.43986	9.31721	9.04248	9.62606	9.75458	9.2428	8.93338	9.56386	7.79293	9.60541	9.64606	10.2216	10.3162	10.4262	9.71001	10.1399	9.76809	8.71727	8.48	9.3603	9.35929	8.56206	7.80307	8.89089	8.51014	8.47006	9.57584	9.56373	9.26032	8.95354	9.63002
Sept5	NM_213614	2	5.83958	5.86842	5.75154	9.62292	9.65459	10.0228	9.93461	9.87231	10.2024	9.41387	9.54699	9.16191	9.98215	9.54446	9.26899	7.98294	9.38494	10.1863	9.92524	9.66739	9.29414	9.66011	10.1619	10.4737	9.55754	10.1404	10.4153	9.56658	8.639	10.0514	11.7999	10.97	9.2871
Smpd3	NM_021491	2	5.64386	5.72266	5.75154	9.79579	9.55006	10.0171	9.78251	9.4615	9.65057	9.42698	9.1888	9.21092	9.6943	8.74307	9.03295	8.12362	9.42155	8.4301	9.53887	8.47852	8.5579	8.54149	8.6338	8.78638	7.94911	8.83261	8.73807	8.214	7.28917	8.94546	9.62047	9.37878	7.30162
Src	NM_001025395	2	5.64386	5.64386	5.64386	8.83567	8.65387	9.04404	8.92365	9.1331	9.2006	8.95211	8.06643	8.4175	8.97014	9.16668	9.00418	9.12834	9.5092	9.19114	8.3649	8.08269	7.45502	8.36293	9.52028	8.26527	7.5649	8.16382	8.05417	7.69165	8.53717	8.46905	9.18737	8.90405	8.39818
Tbrg1	NM_025289	2	7.60959	7.50723	7.47476	10.4711	10.2327	10.3061	10.3286	10.5666	10.4494	10.3428	10.1366	10.2302	10.5299	9.82999	10.1396	9.22522	10.0627	9.02243	10.4394	9.34233	9.4857	9.03456	8.8704	9.37156	9.74063	9.51971	9.68787	9.33846	8.80885	9.6144	10.1192	9.73065	9.39367
Tcf7l2	NM_001142918	2	5.77724	5.79738	5.99012	9.45623	10.0267	10.4346	9.47544	9.57445	9.58832	9.46562	9.03982	9.37399	9.66347	9.03093	8.79832	9.05994	9.46896	10.7153	9.47538	7.58981	8.11798	7.78652	8.88076	8.09915	7.18155	8.68233	8.02567	8.14031	8.05028	8.85352	8.39786	8.61724	8.23576
Usp2	NM_198091	2	6.5483	6.72982	6.37398	7.80648	8.72635	8.09637	8.48096	7.97119	8.42529	8.09907	8.29065	8.39647	7.97958	8.60647	8.24048	8.61175	8.44225	7.6254	7.91972	7.22739	7.48192	7.03703	7.44898	7.59915	7.27948	7.77565	8.31195	7.51632	7.79483	7.5852	8.85776	8.4549	7.76574
0610005C13Rik	NR_038166	2	5.64386	5.64386	5.69872	8.4922	9.15929	8.80917	8.39673	8.54532	8.96751	8.33994	9.2362	8.44507	8.50515	7.44894	7.35581	7.26354	7.48276	8.94361	7.99409	7.47883	7.21965	6.66545	6.79024	7.59915	7.37118	8.08613	8.1759	7.53944	6.82518	6.87816	7.84272	7.09137	6.61316
1700066B19Rik	NM_001033168	2	5.77724	5.79738	5.64386	8.04055	7.08718	7.01465	7.88096	8.0009	7.13052	8.04907	7.67747	7.53324	8.09703	6.89256	7.40947	6.32612	7.93508	6.71832	7.40562	7.15704	6.77386	6.0502	7.23967	7.32583	5.9116	6.96773	6.63516	6.58253	6.5741	6.87816	8.02126	7.45429	6.77963
1810011O10Rik	NM_026931	2	5.64386	5.64386	5.64386	10.3154	9.90263	10.5854	10.7551	10.3239	10.0323	9.67794	9.58638	10.6852	10.6965	9.71658	9.93217	8.8599	9.6801	10.9006	10.5297	9.13834	9.55066	9.2618	8.67007	9.36425	9.34025	9.76378	9.89115	8.88085	8.77196	8.66206	9.57829	9.08517	7.6841
1810019D21Rik	NR_040344	2	5.7121	5.64386	5.69872	8.71778	8.12036	8.51251	8.43946	8.45164	8.62668	8.11537	8.22168	7.74768	8.38431	7.70827	8.27942	6.99708	8.57817	8.30955	7.91972	7.58981	6.43159	6.31868	7.03239	7.44143	6.75193	7.20672	7.29092	7.08494	6.79608	6.99751	8.06264	7.52146	6.42494
1810022K09Rik	NM_001099674	2	6.81973	6.52521	6.26915	8.06971	8.47311	8.18975	7.88096	7.43171	8.20267	8.43386	8.50416	8.25566	7.31276	7.25947	7.33747	7.13646	7.55045	7.32727	8.09891	7.87922	7.74875	7.57719	7.13975	7.91137	6.27034	7.82431	8.0112	7.86637	7.86656	7.47982	7.13672	7.64709	7.18774
2010107E04Rik	NM_027360	2	8.66533	8.64701	8.07117	11.0921	11.3006	11.0651	10.1895	10.2822	11.1919	11.3667	11.5451	11.1241	10.0736	10.0798	10.569	9.81511	10.625	10.0798	11.202	10.5487	10.0592	9.91632	9.62254	10.1261	8.41908	10.6493	10.1898	10.0254	10.1216	10.0966	10.102	10.4177	9.14176
2010107G23Rik	NM_027251	2	5.64386	5.64386	5.64386	7.93883	8.08929	7.99651	8.09207	8.18032	8.12617	7.52275	7.89982	7.96323	8.05542	7.33826	7.75174	6.66998	7.90092	7.242	7.65521	6.64279	7.12045	6.21719	6.99475	6.91019	7.51216	7.37948	6.84548	6.95342	6.18269	6.74805	7.83079	7.52146	6.20842
2010111I01Rik	NM_001289926	2	7.59158	7.65519	7.34322	9.72423	9.08248	9.70901	9.61866	9.96563	9.66935	9.66693	9.62473	9.56829	10.1983	9.7673	9.82106	9.16136	9.88187	9.12124	9.65803	8.74151	9.0554	8.87712	8.96102	8.90191	9.01966	9.24377	9.1744	9.00646	8.47427	9.34861	9.69144	9.27231	8.34604
2010300C02Rik	NM_028096	2	5.7121	5.64386	5.69872	8.26729	7.69435	8.78941	8.46726	8.15413	8.65208	7.97957	7.89982	8.0996	8.34167	7.58442	8.16967	6.94746	7.95187	7.6254	8.23803	7.78904	7.58475	7.59753	7.79393	7.98944	7.14737	7.41169	7.36105	7.24818	6.82518	7.5069	8.30608	8.07736	6.42494
2200002D01Rik	NM_028179	2	5.77724	5.64386	5.69872	12.8784	13.6234	13.359	13.3311	13.3515	13.3617	12.5658	13.3234	13.075	13.2259	12.7978	12.547	11.6548	12.6711	14.2725	13.2832	11.231	10.5406	10.8449	10.9277	11.3218	11.3644	11.7639	11.7796	11.1935	10.4127	11.5887	12.4766	11.7922	10.5611
2310030G06Rik	NM_025865	2	5.64386	5.64386	5.64386	7.59539	7.42247	7.83887	7.17543	7.53682	7.25733	7.49811	7.21604	7.31152	7.67064	6.24422	7.22224	6.60745	7.23105	7.6254	7.4415	6.15779	6.53795	6.6264	6.652	7.26435	6.7057	7.16953	6.70873	6.53731	6.31165	6.50114	7.13672	6.93591	5.95359
2510002D24Rik	NM_001033164	2	7.17441	7.12747	7.01615	8.72391	8.97609	8.96992	9.00176	8.86893	9.03988	8.74783	8.75664	8.95214	8.9589	8.89417	9.06117	8.35055	9.26919	9.14492	8.71198	8.29414	8.15187	8.10333	8.17665	8.59988	7.94911	8.30766	8.73807	7.955	7.60656	8.60055	9.46324	9.2058	7.98614
2610528J11Rik	NM_025572	2	5.64386	5.64386	5.64386	8.82999	8.62166	8.98736	8.50797	8.94729	8.47833	8.09907	8.14304	8.27882	9.22598	8.54134	9.08884	7.5889	8.77019	8.03326	8.48151	7.15704	6.72966	6.66545	7.36297	6.98832	6.79671	7.50419	7.26677	7.13132	6.64108	7.68341	8.67637	8.07736	6.92887
2900026A02Rik	NM_172884	2	5.7121	5.64386	5.69872	9.26353	9.51542	9.4858	9.45477	9.45615	9.28963	9.39398	9.0264	9.27377	9.38141	8.66878	8.9629	8.64325	8.99737	9.53373	9.39073	8.90068	8.93405	9.23609	9.12679	8.98047	8.60686	9.19834	8.99489	8.61312	8.80154	9.00364	9.26919	9.01698	8.75874
5730559C18Rik	NM_028872	2	5.64386	5.64386	5.64386	9.18574	9.11369	9.2794	9.08485	9.17928	9.33478	8.74783	8.89966	8.99007	9.29017	8.75748	9.13736	8.16762	8.99737	8.5052	9.15715	7.35858	7.63354	7.23175	7.55623	7.91137	6.75193	7.59112	7.93661	7.33001	6.8537	7.70694	8.90972	8.0624	7.76574
9530053A07Rik	NM_001164655	2	5.64386	5.64386	5.64386	9.8045	10.352	10.4948	9.90443	9.81495	9.19773	9.84356	8.28503	9.76979	10.3501	7.95326	8.93877	6.78745	7.7363	10.0424	9.94412	8.19228	8.21735	7.88908	8.6215	9.07302	8.31515	9.00082	9.16789	8.3045	7.88048	6.74805	7.44912	7.00011	6.42494
AA467197	NM_001004174	2	5.77724	5.64386	5.64386	11.2244	11.4426	10.7698	10.6162	11.0548	11.842	11.6402	10.9608	11.1754	10.4499	10.5419	10.7687	9.98459	10.8273	10.6914	11.6386	10.0044	9.24003	8.74662	9.51364	8.76434	7.03969	10.1404	8.92716	8.47006	8.12238	9.03188	9.0705	8.90405	8.34604
Abcb1a	NM_011076	2	5.64386	5.79738	5.89937	10.9953	11.4053	10.8403	10.8973	11.0583	10.9141	10.5931	10.8556	10.6441	10.8119	9.63308	9.56931	8.87325	9.85981	10.9075	11.0358	9.32639	8.9534	8.69092	8.96102	9.04587	8.34562	9.52708	9.55456	8.82079	8.88682	8.30904	9.16853	8.59663	7.50549
Abcb6	NM_023732	2	6.39067	6.38688	6.53336	8.25887	7.94054	8.29625	7.63358	8.31646	8.30765	8.23947	8.6159	7.95367	8.55079	7.64767	7.66615	6.94746	7.63602	9.14492	8.26831	7.22739	6.93825	7.03703	7.607	7.59915	7.42924	7.69943	7.57287	6.68973	6.88166	7.47982	7.75708	7.28421	6.77963
Abcc3	NM_029600	2	5.83958	5.86842	5.80253	8.11705	8.18057	9.09321	8.33772	8.52502	8.20267	8.54628	7.96457	7.93435	8.56568	8.75748	8.89554	8.36951	8.22472	9.02243	8.21748	7.22739	7.34214	7.51441	7.74942	7.91137	6.39209	7.27833	7.26677	7.33001	7.92148	8.19713	7.65254	7.47703	7.30162
Abcd3	NM_008991	2	7.26805	7.59362	7.17932	9.95537	9.23931	8.66484	9.4125	9.87231	9.62941	9.64465	9.6158	9.17843	9.48691	8.34543	8.9569	8.14579	9.16508	8.30955	9.90931	8.41964	8.50644	8.10333	7.95938	8.31159	7.64057	8.84446	8.51014	8.35097	8.21323	8.66206	9.22886	9.04007	8.0527
Abcg2	NM_011920	2	5.77724	5.86842	5.94544	8.71162	8.39903	8.01931	8.73073	8.55536	9.04947	7.99726	8.45993	8.38228	8.15728	7.21839	7.20211	6.84278	7.75554	7.40777	8.92973	8.08269	7.896	7.37998	7.03239	7.49594	8.00744	8.35811	7.80862	7.82933	7.5897	7.5069	8.52914	8.17794	7.0641
Abhd11os	NR_026688	2	5.64386	5.64386	5.64386	9.25509	9.95096	9.80724	9.71455	9.5695	9.16868	8.93385	9.4116	9.29665	9.47512	9.71658	9.57323	7.95809	9.29573	9.47889	9.21011	7.96408	7.87586	7.98482	8.42326	8.70774	9.13753	8.46938	8.69346	8.15535	7.85249	8.92553	9.74962	9.36056	7.98614
Abhd14a	NM_145919	2	5.95673	6.00079	6.26915	7.58196	7.08718	7.42634	7.53195	7.51641	6.57962	7.16406	7.26256	7.31152	7.88773	8.11866	7.76553	7.13646	8.06418	7.32727	7.21147	7.08309	7.0858	7.49285	7.27149	8.11665	7.21493	7.56272	7.88994	7.38209	6.60798	7.86178	8.46885	8.34794	7.18774
Abhd14b	NM_029631	2	6.58516	6.8749	6.50286	9.91308	9.94229	10.2638	10.3511	10.0065	10.3207	9.33259	9.78273	10.0866	9.95977	9.57732	9.71139	8.51287	10.0627	8.97036	9.83707	8.44938	8.59533	8.74662	8.42326	9.09084	8.80623	8.78424	9.3282	8.73328	8.07471	8.86403	9.56034	9.26579	8.17728
Abhd6	NM_025341	2	5.64386	5.79738	5.69872	8.27566	7.23645	8.29625	8.12734	8.55536	8.05811	8.55825	8.7444	8.12539	8.54328	7.73764	7.77918	6.99708	7.71679	8.22321	8.59737	6.92271	7.01391	7.06651	7.23967	6.91019	6.96315	7.87138	7.38368	7.20546	7.38998	7.1768	8.11276	7.60642	7.30162
Ablim1	NM_001290816	2	5.89934	5.93612	5.69872	9.55579	9.52125	9.3797	9.42673	9.73768	10.3021	9.09861	9.42189	9.70285	9.32998	8.41978	8.41678	7.79933	9.00543	8.46814	9.52221	8.87899	9.2162	9.37804	8.01685	8.4833	9.34779	9.27036	9.19374	8.98557	8.25659	8.18041	8.06264	8.0624	8.7183
Acpp	NM_207668	2	5.7121	5.72266	5.69872	7.42529	7.60929	7.26405	6.99624	7.77889	8.48306	7.59424	7.35135	7.26587	7.44754	6.72671	7.22224	6.47362	7.17497	6.0966	7.2725	7.15704	6.89887	6.81188	6.38735	7.49594	7.11236	7.09218	7.05743	6.60462	6.5741	7.10773	7.13672	7.30977	5.95359
Actn1	NM_134156	2	6.5483	6.33766	6.23243	10.134	9.43119	10.5029	9.6674	9.68377	9.56399	9.31154	9.33747	9.56829	10.4816	9.97884	10.1209	9.1722	10.3711	8.54134	9.55942	9.47837	9.4107	9.51798	9.8919	9.79759	8.56863	9.67371	9.75452	9.41232	9.28784	10.447	10.659	10.154	10.4042
Acy1	NM_025371	2	6.21368	6.52521	6.07549	8.68674	8.79536	8.76264	8.56053	8.86086	8.23666	8.16317	8.31293	8.64255	8.63088	7.84947	7.75174	7.09148	8.21084	7.05469	7.85468	7.74176	8.08328	8.08904	7.72664	8.76434	7.84632	8.40685	8.46839	8.24948	7.62322	7.5852	8.69623	8.23241	7.30162
Acy3	NM_001302479	2	5.7121	5.72266	5.80253	8.01078	7.85075	7.98498	7.99992	7.97119	7.9045	7.76917	7.6339	8.07333	8.17682	7.95326	8.11688	6.54209	7.95187	7.48402	7.54408	6.29515	6.85839	6.74052	6.79024	7.02586	6.65794	6.83155	6.99998	6.86467	6.50386	6.95882	7.83079	7.25819	6.92887
Adamts15	NM_001024139	2	5.64386	5.64386	5.64386	7.73545	7.1183	8.65031	8.07411	7.38743	7.49116	6.81092	6.82462	7.46754	7.92286	7.37611	7.9817	6.89607	7.8481	6.71832	7.52748	6.64279	7.18733	7.23175	6.69957	7.8707	6.20537	7.09218	7.08532	6.68973	6.26993	7.14268	7.11722	6.93591	6.20842
Adck5	NM_172960	2	6.88031	6.72982	6.56322	9.74245	9.19621	9.48988	9.6614	9.90802	9.56176	9.25384	9.15836	9.65052	9.6841	9.16668	9.12672	8.67409	9.35371	9.16822	9.38153	8.26098	8.72482	8.55195	9.18644	9.34952	8.13501	8.83261	8.97266	8.67706	8.47427	9.01312	9.89703	9.51137	8.17728
Adcy6	NM_007405	2	5.64386	5.64386	5.75154	10.5781	10.2468	10.6974	10.7664	10.613	11.0244	10.3219	10.1382	10.6823	10.4678	10.3316	10.521	9.316	10.9885	9.12124	10.4148	9.37369	8.97249	8.92618	9.14408	9.57515	8.90159	9.30506	9.44581	9.01885	8.0379	9.05957	10.5395	10.1681	8.87368
Adgra3	NM_133911	2	5.95673	5.64386	5.69872	8.74214	8.04139	8.79603	8.54757	8.5352	8.90196	8.17875	8.07297	8.24785	8.4974	7.64767	8.02819	6.60745	8.34395	7.55644	8.55705	7.64225	7.25126	7.06651	6.91639	7.44143	7.03969	7.67311	7.26677	6.91857	6.22697	7.07192	7.65254	7.2047	6.92887
Adgrg1	NM_018882	2	5.83958	5.93612	5.75154	8.92881	8.22413	8.72847	8.35271	8.5352	9.01724	8.39436	8.62928	8.59412	8.98684	8.02648	8.47667	7.13646	8.50044	7.242	7.93238	8.08269	8.45307	9.01957	8.22622	8.45607	8.93203	8.7214	9.08052	8.02219	7.68801	7.98244	8.85187	8.2589	6.42494
Adtrp	NM_001145875	2	5.64386	5.72266	5.64386	8.00072	8.18057	8.23914	7.90148	8.02999	7.93931	8.03201	7.75274	7.72537	8.05542	7.17611	7.03007	6.32612	6.95952	7.69121	8.59737	7.29448	7.0858	6.66545	6.9561	7.35561	6.06596	8.08613	7.13953	7.13132	6.79608	7.24271	7.7944	7.43119	6.42494
Afdn	NM_010806	2	7.1984	7.29155	7.49039	9.68706	9.73207	9.71252	9.57461	9.56453	9.97135	9.50325	9.58638	9.52049	9.308	8.69896	8.78485	8.16762	9.28252	10.017	9.57566	9.32639	9.00066	8.83491	8.67007	8.66079	8.73897	9.42034	9.35135	8.59668	8.20218	8.60055	8.8926	8.87866	7.84301
Agr2	NM_011783	2	5.64386	5.64386	5.80253	14.1919	13.3268	12.5812	13.5865	13.7458	13.0818	14.1955	14.0563	13.5508	14.3421	12.7463	13.4339	12.0959	14.0214	12.1302	13.2485	11.5657	11.2193	10.7527	10.764	11.6599	10.959	11.8706	12.7438	11.0935	10.9455	12.0996	13.8459	13.4551	11.9269
AI661453	NM_145489	2	5.64386	5.72266	5.69872	8.18082	7.92302	8.13862	8.03749	8.2438	8.33405	8.29774	7.90716	8.36072	8.12747	7.58442	7.8713	6.84278	7.75554	7.75415	8.00612	7.29448	6.68408	6.50246	6.83352	7.38479	6.88234	7.50419	7.42792	6.82759	6.31165	6.79274	7.88947	7.54317	6.42494
Akap1	NM_001042541	2	6.69039	6.43448	6.53336	9.11754	8.33424	9.23627	9.18031	9.37909	9.19773	8.73734	8.72376	8.35347	9.73441	8.52459	8.72966	7.5889	8.65192	8.88856	8.47287	7.92227	7.60935	7.73238	8.15975	7.78574	7.92913	7.91696	7.82525	7.38209	6.93603	8.0016	8.65624	8.20543	8.17728
Akap2	NM_001035533	2	5.64386	5.64386	5.64386	8.91816	8.88855	8.79603	9.17189	8.61419	9.29502	8.2689	8.20986	9.13254	8.73997	8.22617	8.20044	8.00736	7.88353	8.08314	8.54886	9.32639	9.4857	9.25542	8.54544	8.66079	9.23025	9.09306	9.16789	8.86264	7.53792	8.4129	8.79776	8.12132	7.91635
Akr1c12	NM_013777	2	5.7121	5.86842	5.69872	10.0339	9.41248	9.21175	9.78802	10.0848	10.4239	9.8726	9.80451	9.46434	9.9738	7.79464	8.33595	7.77108	8.70239	8.97036	10.2271	8.19228	8.18498	7.8557	7.607	7.84992	7.51216	8.4846	8.78133	7.9202	7.13504	7.5852	8.38976	8.16399	6.61316
Akr1c19	NM_001013785	2	5.64386	5.64386	5.64386	9.13604	8.64321	8.21958	8.80885	9.27355	8.99756	9.50942	10.1872	8.93766	9.32123	6.99339	7.88399	6.32612	8.23846	8.30955	9.10776	7.22739	7.18733	6.9127	6.69957	7.32583	7.11236	7.82431	9.00952	7.3432	7.28917	6.91905	7.35231	7.25819	6.42494
Alad	NM_008525	2	7.64492	7.26547	7.23605	9.62292	9.42498	9.63715	9.36895	9.89622	9.81143	9.39398	9.43718	9.27761	9.74754	8.4905	8.72261	7.93282	8.98111	9.21371	9.03329	8.71727	8.91444	8.26463	8.71705	8.53628	9.18041	8.95784	9.14157	8.56886	8.25659	8.30904	9.21056	8.82649	8.11634
Aldh1a1	NM_013467	2	5.64386	5.72266	5.64386	7.84072	7.73507	7.66186	7.77374	8.29264	7.9598	8.25426	9.73196	8.21619	8.55826	7.08764	7.20211	6.60745	7.50568	7.98159	8.38347	7.83484	7.39968	7.53564	6.38735	7.78574	7.68889	8.08613	8.75553	7.98899	7.44725	8.11153	7.90092	7.6269	7.76574
Aldh1l1	NM_027406	2	5.7121	5.64386	5.69872	9.39225	9.32849	9.35751	9.38362	9.29768	9.66935	8.42082	8.40913	8.85786	8.76601	8.79986	8.93267	8.44297	9.43355	8.03326	8.92973	7.35858	7.45502	7.23175	7.607	7.80745	7.66493	7.59112	7.13953	6.86467	6.93603	7.33625	8.52914	8.01657	7.18774
Aldob	NM_144903	2	5.64386	5.64386	5.64386	10.5053	10.0185	10.3427	9.76581	10.5187	9.28152	10.0356	10.1366	9.91241	10.7835	9.33945	9.84072	8.61175	10.1232	10.5027	10.3407	10.3102	11.0181	10.4059	9.75226	10.9809	9.82413	11.2305	10.8748	10.6541	9.55862	10.1144	11.3059	10.8618	9.11086
Als2cl	NM_001146059	2	6.11632	6.17903	6.19478	7.88515	7.88734	8.05284	7.77374	8.08649	9.08099	7.70603	7.66886	8.27114	7.91124	7.51828	8.01671	7.62091	7.75554	7.05469	7.71506	7.92227	7.99267	7.90548	7.63174	7.64811	6.79671	7.96115	8.26395	7.80091	7.3099	7.70694	7.94585	7.78104	7.6841
Ank3	NM_170687	2	5.64386	5.64386	5.64386	8.97579	8.81449	9.44429	8.8726	9.14644	9.02699	9.09039	8.58419	8.55037	9.1588	7.76642	7.96985	7.34245	8.44225	9.16822	9.29592	7.47883	7.0858	7.35631	7.20712	7.41339	7.24757	7.87138	7.80862	7.40745	6.9091	7.4241	7.51022	7.58564	6.77963
Anks4b	NM_028085	2	5.64386	5.72266	5.64386	8.94464	8.68538	8.61333	9.20528	9.15307	8.95055	8.77884	8.60239	8.80564	9.2071	7.13256	7.65138	6.94746	7.67697	9.88258	9.34884	7.58981	7.53425	7.06651	6.91639	7.35561	7.34126	8.23753	7.16589	7.55085	5.99059	6.99751	7.85455	7.66701	6.42494
Ano9	NM_178381	2	5.64386	5.64386	5.64386	8.28398	7.97495	7.88924	7.81759	8.5352	8.48306	7.68435	8.15542	7.86459	8.24318	7.48403	7.77918	6.89607	7.88353	8.54134	7.95738	8.00471	8.0656	7.17874	7.7035	8.49673	7.88832	8.1255	8.16287	7.43236	7.0878	7.77535	9.04492	8.63757	7.84301
Anxa4	NM_013471	2	7.9292	8.82721	8.61107	10.2908	9.41248	9.66993	10.0448	10.5263	10.0845	9.96089	9.84711	9.82592	10.7016	9.71658	10.0579	9.26627	10.1083	9.27937	10.1533	10.3183	9.66068	9.92439	8.99954	10.1261	9.30192	10.2469	10.498	10.0172	9.36417	9.87038	11.3048	10.7635	8.75874
Aoc1	NM_029638	2	5.7121	5.64386	5.64386	10.7843	10.6146	11.228	10.7238	10.5416	10.3167	9.65025	9.3429	10.359	10.4256	10.3743	10.4395	9.05994	10.7333	9.71868	10.3455	8.78881	9.02829	8.53095	8.82823	9.09966	8.15235	9.56337	9.15479	9.06339	7.71935	9.08675	10.597	9.81785	7.30162
Ap1m2	NM_001110300	2	6.0119	5.79738	5.89937	9.82745	9.44966	10.0001	9.88395	9.97688	9.93904	9.75794	9.40902	9.48773	10.0657	9.53613	9.95941	8.47834	10.0704	8.80184	9.81672	8.32656	7.93545	7.71387	8.35062	8.82947	8.00744	8.49965	8.77278	8.05465	7.4842	8.61306	10.2049	9.42044	7.91635
Apob	NM_009693	2	5.64386	5.64386	5.64386	7.79488	7.73507	7.08116	7.98076	7.76165	8.06444	7.70603	7.94331	7.26587	7.27699	6.47099	6.26489	6.07202	6.85633	7.928	8.64432	7.87922	8.15187	7.9217	7.33311	8.23354	7.71247	8.43845	7.74009	7.48094	6.5741	7.70694	8.57276	8.37241	6.61316
Apol10a	NM_177744	2	5.64386	5.64386	5.64386	8.693	7.5648	8.41273	8.1954	9.65137	8.70159	9.88215	9.89774	8.98539	9.09861	9.07761	9.07784	8.18913	8.58894	9.56917	10.1641	8.71727	9.2162	8.37477	7.97879	8.53628	7.61578	9.30506	8.31195	9.35484	8.19104	9.08675	10.6145	9.78178	7.6841
Arap2	NM_178407	2	6.21368	6.23387	5.85175	8.76014	8.66445	8.11765	8.07411	8.50443	8.68937	8.33994	8.15542	7.97274	7.99066	7.48403	7.30008	6.99708	7.88353	7.40777	8.7266	7.92227	8.24901	7.73238	7.23967	7.41339	7.53877	8.29044	7.82525	7.59566	7.37037	7.55957	7.59729	7.93679	7.59756
Arfgef3	NM_001033258	2	5.64386	5.64386	5.64386	7.5684	7.63103	7.37425	7.07061	7.69053	7.27924	7.31275	7.18013	7.4404	7.76402	7.21839	6.93568	6.07202	7.7363	5.64386	7.4415	6.15779	6.53795	6.10804	6.55189	6.06031	6.33251	6.51322	6.43294	6.14366	6.26993	7.1768	7.2305	7.35957	6.20842
Arhgap12	NM_029277	2	5.95673	6.17903	6.19478	8.18971	8.32093	7.40919	7.7513	7.70864	8.25887	8.35374	7.91446	7.91476	7.29498	8.09616	7.8713	8.07823	8.13937	7.32727	8.13223	7.35858	7.45502	7.51441	6.87555	7.71856	7.00193	7.34655	7.55303	7.48094	7.3505	7.84066	7.70576	8.00096	7.84301
Arhgap5	NM_009706	2	5.83958	5.79738	5.75154	8.30865	8.13565	7.88924	7.79583	7.24579	8.18537	8.25426	8.08597	7.50731	6.95367	6.6669	6.86062	7.30353	7.8481	7.48402	8.00612	7.92227	7.97385	7.49285	6.99475	6.91019	7.21493	7.69943	7.47084	7.52792	7.28917	7.73011	7.58314	8.32305	6.92887
Arhgef16	NM_001112744	2	5.64386	5.64386	5.69872	9.67762	9.36787	9.58463	9.52918	9.623	9.98141	9.31154	8.98884	9.21092	9.13402	8.69896	8.83146	8.1011	9.06063	9.23593	9.52639	8.12015	7.68073	6.9762	7.77185	7.8707	7.42924	8.25538	7.82525	7.74234	6.64108	7.84066	9.13498	8.4549	7.40715
Arhgef19	NM_172520	2	5.64386	5.64386	5.64386	7.45507	7.14876	7.58755	7.6579	7.40975	7.03074	7.22539	7.43497	7.08493	7.51049	7.25947	7.20211	6.47362	7.20328	7.81446	7.01114	6.29515	6.19204	6.45866	6.4443	6.26251	5.9116	6.73304	6.74415	6.60462	6.04107	6.83609	7.49518	7.28421	6.42494
Arhgef5	NM_133674	2	5.64386	5.64386	5.64386	8.73609	8.46103	8.64299	8.33772	8.74279	8.89843	8.52205	8.23341	8.49209	8.8167	8.18412	8.39921	7.26354	8.22472	9.07268	8.85187	8.00471	7.97385	7.57719	6.9561	7.59915	7.4005	8.00402	7.85796	7.59566	7.11162	7.86178	8.3816	8.03201	7.0641
Arl4a	NM_007487	2	6.47164	6.48056	6.37398	9.86398	9.27427	9.55373	9.98836	9.51908	9.18037	9.36702	9.02303	9.9198	10.0042	9.23004	9.20467	7.98294	8.79831	10.3481	9.92524	8.616	8.29524	7.98482	7.67997	8.28088	8.28403	8.69547	8.21429	8.11745	7.79483	7.77535	8.58701	8.2589	7.6841
Arpin	NM_027420	2	5.7121	5.64386	5.64386	8.56228	7.63103	8.42985	8.43946	8.77752	8.52949	7.84927	7.87757	7.90486	8.8291	8.07331	8.32668	7.22241	8.18267	7.81446	8.20709	7.08309	7.0858	7.23175	7.39221	7.29541	7.42924	7.84803	7.26677	7.30324	6.5741	7.5852	8.74788	8.32305	6.77963
Asns	NM_012055	2	5.83958	5.93612	5.75154	8.28398	7.90529	7.70468	7.30431	7.79594	7.3739	7.97957	7.68604	7.46754	8.13748	6.83937	7.55943	6.47362	8.01711	5.88792	7.86792	7.83484	7.68073	7.57719	7.03239	7.35561	7.21493	7.72529	7.95184	7.35628	6.8537	7.75291	8.93779	8.31045	7.18774
Aspg	NM_001081169	2	5.7121	5.64386	5.64386	7.58196	7.60929	7.85163	7.47832	7.69053	7.5996	7.42157	7.48489	7.72537	7.94581	7.25947	7.42693	6.24629	7.23105	8.26703	7.16929	6.42058	6.12536	6.16364	6.87555	7.35561	6.7057	6.96773	6.67241	6.23145	5.88401	6.50114	7.49518	7.17719	6.42494
Atp10b	NM_176999	2	5.64386	5.64386	5.64386	9.51396	8.959	8.80261	9.18868	9.26745	9.11183	9.10678	8.95383	8.7066	8.8475	7.87613	8.27942	7.48839	8.89694	9.02243	9.35355	8.47852	8.29524	7.33224	7.74942	7.8707	7.24757	8.25538	7.79179	7.03701	7.18078	7.36613	8.39786	8.07736	6.61316
Atp1b1	NM_009721	2	6.0119	5.72266	5.99012	13.2869	13.2503	13.4556	13.3159	13.3955	13.2629	12.8831	12.8154	12.5784	13.187	12.1362	12.2147	11.4362	12.5544	12.4928	13.078	11.3101	10.9451	10.5744	11.1301	11.2364	10.2756	11.4919	10.9639	10.729	9.85513	10.2844	11.8174	11.2661	9.41912
Atp6v0e2	NM_133764	2	5.64386	5.64386	5.69872	7.49862	7.67355	7.57222	7.90148	8.05852	7.50052	7.13239	7.19219	7.71409	7.44754	7.33826	7.54351	6.60745	7.8481	7.75415	7.29228	6.15779	6.43159	6.58625	6.4991	6.82759	6.65794	7.05187	6.99998	6.95342	5.82762	6.95882	7.81876	7.30977	6.61316
Atp8b1	NM_001001488	2	5.64386	5.64386	5.64386	9.25085	9.28802	9.34854	8.88296	9.17278	9.14204	9.10678	9.33475	8.94251	9.35592	8.05008	8.32668	7.55617	8.69243	7.6254	9.18387	7.87922	8.20126	7.47098	7.39221	8.32671	7.64057	8.52931	8.40341	8.01396	7.65598	7.63514	8.5799	8.86148	7.50549
Atp9a	NM_001289445	2	5.89934	5.79738	5.69872	10.4342	10.3488	10.1156	10.7122	10.4011	10.3636	10.0819	9.91604	10.0126	10.4519	9.9031	10.2143	8.95085	10.5107	10.4466	9.91889	9.15648	8.6674	8.25185	8.78478	9.27355	8.33046	9.28781	8.83981	8.49983	7.52023	8.97484	10.2003	9.57071	8.44849
Atxn1	NM_009124	2	6.30489	6.65142	6.50286	8.34887	8.04139	8.16951	8.2604	8.54532	8.60082	8.11537	7.85497	8.06447	8.21512	7.70827	7.76553	7.71287	8.16839	7.32727	8.21748	8.15667	8.10074	7.69512	7.8371	7.59915	7.78095	8.21945	7.82525	8.102	7.28917	8.23001	7.87792	8.12132	8.29195
Auts2	NM_177047	2	5.64386	5.64386	5.64386	8.16288	7.58722	8.69347	7.96135	7.79594	7.26833	8.09907	8.60239	7.6325	8.44196	7.61639	7.33747	6.07202	7.63602	8.4301	7.93238	6.64279	6.68408	6.21719	7.47655	7.69546	7.64057	7.16953	7.05743	6.34078	6.79608	7.14268	7.91228	8.23241	6.61316
Axin2	NM_015732	2	5.64386	5.64386	5.75154	7.29962	6.1447	6.8965	7.39394	7.45336	7.51904	7.22539	6.80903	6.75118	7.75104	7.44894	6.95987	6.60745	7.11662	5.64386	6.77845	7.78904	6.97657	6.9127	7.77185	7.93129	6.7057	7.50419	6.87773	6.75043	6.76638	7.24271	8.64265	8.40834	6.92887
B4galnt2	NM_008081	2	5.77724	5.72266	5.69872	10.7106	9.15179	9.94755	9.61866	11.008	9.58393	11.2572	10.5304	9.87742	10.9503	10.2975	10.1527	9.41059	10.4141	10.2312	11.3066	10.0439	9.7127	9.042	9.10045	10.4429	9.07526	10.1923	10.0517	9.38067	9.29825	10.433	11.4277	11.1002	8.63385
Bace2	NM_019517	2	5.64386	5.64386	5.64386	8.52767	7.26455	7.98498	7.81759	8.15413	7.53733	7.97957	7.87007	7.98218	8.71347	7.51828	7.80611	6.94746	7.98486	5.88792	7.85468	7.22739	7.0858	6.9127	7.17383	6.26251	7.11236	7.61897	6.99998	6.53731	6.70509	6.65429	7.92356	7.2047	7.0641
Baiap2l1	NM_025833	2	5.64386	5.64386	5.64386	10.1038	9.98934	10.3382	10.0074	10.3121	10.0112	9.56386	9.47225	9.62965	9.92264	9.24034	9.44205	8.29211	9.66491	9.47889	10.0583	8.19228	8.08328	7.44876	8.01685	8.24949	7.80307	8.29044	7.99659	7.69165	7.24679	7.94333	9.08564	8.48887	7.40715
Baiap2l2	NM_177580	2	5.64386	5.64386	5.64386	8.9603	8.76619	9.31668	9.1549	9.23032	8.77281	8.63935	8.81243	9.06306	9.80202	8.63796	8.98663	7.55617	9.37253	8.61101	8.41088	8.66752	8.08328	9.20991	8.70545	9.63709	8.13501	9.09306	9.7149	8.94285	8.06255	9.10458	10.9442	10.3729	8.67669
Batf2	NM_028967	2	6.0119	6.38688	5.94544	7.99059	7.86916	8.03057	8.14466	8.35146	7.77173	7.90657	7.48489	7.66803	8.28879	8.59046	8.80501	8.38823	8.64161	7.15138	8.29798	7.15704	7.63354	7.82153	7.8371	7.20013	5.9116	8.35811	7.87403	7.87548	8.19104	8.24616	8.77926	8.83532	7.18774
Bcar1	NM_009954	2	5.64386	5.64386	5.75154	8.80708	8.53207	8.66484	8.59873	8.76892	8.6224	8.43386	7.98553	8.35347	8.75954	8.14081	7.88399	6.99708	8.34395	7.81446	8.77662	8.44938	8.4666	7.9536	7.97879	8.23354	8.0635	8.29044	8.61909	8.4519	6.73606	8.11153	9.12524	8.33556	6.92887
Bcar3	NM_013867	2	5.64386	5.64386	5.64386	8.92881	8.81449	8.35118	9.1549	9.07843	9.11792	8.25426	8.37777	8.7896	8.86567	8.41978	8.18	7.79933	8.19682	8.88856	9.33936	7.96408	7.91586	7.49285	8.09006	7.98944	7.75848	8.20114	8.20161	7.46894	7.24679	7.70694	8.60813	8.1499	7.40715
Bcas1	NM_029815	2	5.7121	5.64386	5.80253	8.20731	8.19523	8.09637	8.43946	7.94087	8.23104	7.74843	7.09269	7.76966	8.45803	7.70827	8.30796	6.89607	7.77454	5.88792	8.17548	6.92271	6.72966	6.84627	6.83352	6.6467	6.44933	7.24296	6.81249	6.53731	6.53941	6.50114	7.93475	7.14915	6.92887
Bche	NM_009738	2	5.64386	5.64386	5.64386	7.52694	7.77467	7.22536	6.55304	6.8485	7.70046	7.80978	8.013	7.35577	6.70726	6.6669	6.78143	6.84278	7.02442	6.27888	7.51069	7.00512	6.93825	6.87987	6.13393	6.82759	6.44933	7.31284	7.05743	7.19093	6.35219	6.44624	7.17498	7.00011	5.95359
Bcl2l14	NM_025778	2	5.77724	5.72266	5.64386	9.199	9.05057	9.08243	9.4125	9.38473	9.59707	8.92464	8.66868	8.7788	9.13901	8.6223	8.9629	7.65222	8.90558	8.57659	8.80444	7.29448	7.85544	7.37998	7.55623	7.74131	6.75193	7.82431	7.13953	6.97052	7.42841	7.1768	8.35686	7.88672	8.0527
Bdh1	NM_001122683	2	5.83958	5.72266	5.75154	10.5369	9.67566	10.2494	10.2102	10.5032	10.3636	10.2499	9.99395	9.66817	10.5127	9.37726	9.63835	8.80523	9.77275	10.0298	10.1721	8.90068	9.24788	7.9536	9.24371	9.18509	7.90887	9.00082	8.98011	8.47606	7.38998	8.84294	10.2549	9.57599	8.54415
Bhlhe40	NM_011498	2	5.95673	6.72982	6.56322	9.66494	9.41875	9.77412	10.0448	9.42363	9.44548	9.35335	9.36439	9.75885	9.77983	9.2808	9.74308	9.87606	9.22844	10.3275	9.66184	8.90068	9.20817	9.29331	7.97879	9.04587	9.02908	9.26155	9.41867	8.87178	10.1987	8.64997	8.70932	8.76315	8.44849
Blnk	NM_008528	2	5.89934	5.86842	5.75154	9.76343	9.44353	9.4316	9.54231	9.70648	10.1439	9.5278	9.67074	9.15775	9.37296	9.86368	9.54154	9.73694	9.81464	9.38258	10.1721	8.87899	9.14226	8.39814	8.1078	8.15102	8.28403	8.58685	8.03999	8.97713	7.65598	8.68595	8.94887	8.67738	9.14176
Bmp2	NM_007553	2	5.64386	5.64386	5.64386	8.49937	9.15179	8.43833	8.62365	8.19324	8.78817	7.74843	7.75274	8.58175	8.30664	8.2053	8.13823	8.35055	8.36916	7.87235	8.3649	7.00512	7.0858	7.15149	6.69957	7.13293	7.27948	7.87138	7.82525	8.3045	6.39163	7.79745	7.74442	7.92029	7.50549
Bmpr1a	NM_009758	2	5.64386	5.64386	5.64386	8.21603	7.94054	7.826	8.01883	7.9099	8.00652	8.40765	8.21578	7.76966	8.2616	7.84947	7.69526	6.60745	8.23846	7.242	8.00612	7.87922	7.55972	7.30777	7.06907	7.38479	7.66493	8.35811	7.99659	7.31669	6.8537	8.0016	8.0829	8.1499	7.0641
Boc	NM_172506	2	5.7121	5.64386	5.64386	7.98039	6.98959	7.12385	8.10981	8.14086	7.53733	7.88772	7.80869	7.73657	8.2616	7.37611	7.1817	6.24629	7.33706	7.15138	7.45911	7.00512	7.05031	7.0954	6.9561	6.43981	5.64386	7.50419	7.2422	6.86467	6.35219	7.30574	7.07739	6.6053	6.77963
Bok	NM_016778	2	5.64386	5.64386	5.64386	7.90687	7.42247	7.39182	7.81759	8.29264	8.17956	7.78962	7.71978	7.54602	8.23389	7.82232	7.73783	6.72991	7.98486	7.69121	7.51069	7.69287	7.55972	7.0954	7.33311	7.8707	7.75848	7.75069	7.49183	7.45685	6.8537	8.0016	8.33169	7.96923	7.91635
Bpnt1	NM_011794	2	7.1984	7.50723	7.5953	9.12682	8.33424	9.08243	8.88296	9.2428	9.04308	8.87766	8.63371	8.26342	9.4229	8.09616	8.66494	7.85421	8.74152	8.86023	8.95478	8.74151	8.65563	7.78652	8.57124	8.23354	7.80307	8.58685	8.26395	7.90248	7.57265	7.94333	9.10062	8.39646	7.18774
Bsg	NM_009768	2	10.5836	10.431	10.4215	12.4464	12.4366	12.3056	12.5278	12.9109	12.1168	11.9764	12.3196	12.2975	12.6453	12.4463	12.662	11.7264	12.6507	12.4098	12.3021	11.2565	11.1664	11.2645	11.0474	11.6313	10.849	11.618	11.5624	11.268	11.2531	11.8777	12.6512	12.2456	11.4897
Bspry	NM_138653	2	5.64386	5.72266	5.64386	10.6715	10.2953	10.6761	10.1642	10.6948	10.2927	10.3149	10.4064	10.1424	10.6999	9.93514	10.3417	8.8599	10.5663	9.95135	10.2751	8.41964	7.85544	7.4262	8.32051	8.52322	8.18641	8.51456	8.33536	7.87548	7.4842	7.98244	9.30843	8.95354	8.11634
Btg2	NM_007570	2	9.90776	10.039	9.94238	11.716	11.1823	11.76	12.5475	11.6958	11.2155	11.3718	10.9669	12.0784	12.2441	12.236	12.6757	12.9761	12.1604	12.545	11.6014	10.5349	10.9903	11.2818	10.5471	11.0644	10.8168	11.0733	11.5955	11.1584	12.0134	11.7	11.7999	11.9076	11.6326
Btnl1	NM_001111094	2	5.64386	5.64386	5.64386	8.21603	6.77204	7.78668	7.42262	8.28059	8.03255	7.94353	7.95043	7.88487	8.00166	7.67829	7.40947	6.32612	7.69702	7.81446	7.89405	7.15704	7.72644	6.81188	7.42088	7.32583	6.44933	8.20114	7.70457	7.77193	6.43002	7.14268	8.93222	8.17794	6.42494
C77080	NM_001033189	2	5.64386	5.64386	5.64386	10.673	10.4098	11.0135	10.6799	10.5567	11.2996	10.3078	10.2989	10.2362	10.4479	9.85701	9.87291	8.92544	9.9036	9.58657	10.5066	9.31027	8.98194	8.91812	8.98041	8.91197	7.45741	9.43608	9.23167	8.90331	8.08678	8.83227	9.93931	9.53323	7.84301
Cacnb3	NM_001044741	2	5.7121	5.64386	5.64386	7.88515	8.10491	7.69055	7.7513	7.98612	8.52949	7.34073	8.44991	8.55037	8.11739	8.18412	7.89658	6.94746	8.36916	8.08314	7.4765	7.15704	7.21965	7.00694	6.91639	7.20013	7.34126	7.34655	7.77476	7.52792	6.67344	7.73011	8.1988	7.93679	7.0641
Calml4	NM_138304	2	5.7121	5.72266	5.75154	10.7546	10.7867	10.3084	10.4761	10.8271	10.893	10.5	10.9555	10.5772	10.4112	9.3958	9.85046	8.46076	9.95029	10.1977	10.886	9.83449	9.2712	9.3363	9.01842	9.61879	8.91181	9.98323	9.54455	9.06737	8.67939	9.27963	10.097	9.61752	8.54415
Camk2n1	NM_025451	2	5.64386	5.64386	5.64386	9.69956	9.65988	9.52216	9.74325	10.1258	9.81331	9.27575	9.09871	9.70855	9.20234	9.85701	9.70782	8.40671	9.22154	9.04777	10.1177	9.66739	9.65478	9.56003	8.98041	9.19336	8.31515	10.0202	9.91854	9.49151	8.22419	9.86516	10.4682	9.73537	8.5897
Camsap3	NM_027171	2	5.64386	5.64386	5.64386	9.28855	9.02617	8.94632	9.42673	8.96247	8.99756	8.77884	8.74849	8.9994	9.19278	8.6223	8.72966	7.45326	9.08366	9.32154	8.93603	7.83484	7.53425	7.28287	7.36297	8.26527	6.39209	8.00402	7.70457	7.52792	7.18078	8.0016	9.38383	8.83532	7.59756
Capn5	NM_007602	2	5.83958	5.79738	5.80253	9.32932	9.36138	9.52615	9.2217	9.74209	9.5927	8.70541	9.01964	8.97597	9.4147	8.72852	8.9018	7.85421	8.86185	9.04777	9.03329	7.41995	7.85544	7.23175	7.67997	6.6467	7.45741	7.50419	7.44954	7.78165	6.53941	8.19713	8.3816	7.9036	7.91635
Car12	NM_001306148	2	5.64386	5.64386	5.64386	7.80648	6.36826	7.40919	7.24132	7.81277	7.00468	7.94353	7.8165	7.03136	8.15728	7.04129	6.93568	6.60745	7.14608	8.57659	8.27827	7.00512	6.63699	6.26883	6.99475	7.29541	6.88234	7.16953	6.34339	6.41765	6.53941	6.65429	7.53983	7.25819	5.64386
Car4	NM_007607	2	5.64386	5.64386	5.64386	10.7044	11.8037	9.9084	10.613	11.7677	11.1531	10.0313	10.5028	9.87235	10.3925	10.7031	9.58105	9.38286	10.3491	12.1567	11.5855	9.06339	10.0413	9.92841	8.95123	9.35691	8.92196	10.0045	9.79309	9.44636	8.51055	9.62061	11.2136	10.2195	8.23576
Car9	NM_139305	2	6.39067	6.65142	6.56322	9.11754	8.54358	9.08783	8.74215	9.25518	9.0205	8.88718	8.62037	8.42444	9.23998	8.41978	8.62769	7.88089	8.56732	8.77174	8.96714	7.87922	7.95478	7.65687	8.09006	8.0635	7.90887	8.30766	8.0112	8.102	6.73606	8.11153	9.03456	8.40834	5.95359
Card10	NM_130859	2	6.21368	6.48056	6.75658	8.15384	7.69435	8.67923	8.39673	8.19324	7.33259	7.49811	7.78498	7.71409	8.28879	7.70827	8.23057	6.60745	8.09473	7.242	7.52748	7.64225	7.99267	7.80413	7.99795	7.98944	8.26821	7.53375	8.08212	7.3432	7.22512	7.55957	8.71582	7.92029	7.18774
Caskin2	NM_080643	2	6.65617	5.86842	6.15609	7.94933	7.88734	8.32397	8.21193	8.21874	7.5464	7.70603	7.94331	7.59607	8.45803	7.44894	7.75174	7.13646	7.55045	7.81446	7.62432	7.53538	7.34214	7.87248	6.83352	7.20013	7.98825	7.50419	7.92122	7.26215	6.76638	7.03519	8.00011	7.88672	7.0641
Casp1	NM_009807	2	7.57335	8.18686	7.71986	9.8246	10.0551	9.54982	9.18031	9.03603	9.98141	10.0441	9.90142	9.94898	8.64498	8.02648	8.18	8.21033	8.54537	9.63754	10.1452	9.31027	9.20009	9.00442	8.39464	9.27355	8.20315	9.55618	9.46186	9.35158	9.25079	8.90532	8.43773	8.88717	7.76574
Casz1	NM_001159344	2	7.66228	7.34234	7.56609	10.0065	10.1257	10.2028	9.98836	10.0952	10.141	9.53992	9.44477	9.8048	9.85149	8.68395	8.89554	8.33133	9.6131	9.86843	9.80987	9.08249	9.23213	8.3865	8.98041	9.20158	8.39014	9.30506	9.12151	8.63475	7.78005	8.69775	9.54946	9.36056	7.98614
Cblc	NM_001161844	2	5.64386	5.64386	5.64386	9.56947	9.14425	9.13555	9.3763	9.72439	10.0144	9.06545	8.89966	9.25442	9.40645	7.37611	7.54351	7.18007	7.83006	9.44113	9.14632	8.00471	7.74875	7.9536	7.47655	7.97032	7.78095	8.1255	8.22687	7.38209	6.93603	7.1768	7.94585	7.17719	6.61316
Cd151	NM_009842	2	7.8252	7.92886	8.31887	9.83313	9.42498	10.1701	9.62484	10.0639	9.85219	8.96115	9.60004	9.55885	10.2384	9.8368	10.0239	8.95085	9.86867	8.88856	9.5957	8.69261	9.09077	9.01957	9.23567	9.13444	9.53788	9.53441	9.64635	8.97713	8.37937	9.23175	10.054	9.35443	8.5897
Cd24a	NM_009846	2	7.95758	8.85371	8.41209	10.2297	9.81513	9.33042	9.31643	9.91584	10.0892	10.4398	10.822	9.76706	10.3285	9.17743	9.23966	8.51287	10.0076	9.44113	9.70676	9.943	9.17559	8.35101	8.6215	9.46333	8.85999	9.30506	9.2065	8.68744	9.26678	8.99411	9.97767	9.97388	8.7183
Cd320	NM_019421	2	5.95673	6.06268	5.94544	7.97011	7.67355	8.08561	7.81759	8.28059	7.96657	7.88772	8.32942	7.87477	8.38431	7.87613	8.1276	6.99708	8.36916	7.15138	7.4415	7.22739	7.05031	6.9448	6.87555	7.35561	7.64057	6.73304	7.13953	6.75043	6.9091	7.07192	7.31854	7.33488	7.0641
Cd38	NM_007646	2	5.64386	5.64386	5.75154	9.79579	9.22509	8.77609	9.39813	9.67459	9.87034	9.35335	8.80852	9.05861	9.44724	9.00701	9.14265	9.23559	9.04507	8.13135	9.94099	8.64199	8.97249	8.83491	9.25967	8.86096	8.00744	9.45165	9.00952	8.8018	8.75694	9.37088	9.50887	9.5278	8.23576
Cd55	NM_010016	2	5.64386	5.72266	5.69872	8.04055	8.3605	7.75986	7.92172	8.20605	8.33928	8.13148	7.89244	8.57553	7.91124	7.76642	7.65138	7.34245	7.69702	7.48402	8.46417	7.08309	7.12045	6.87987	6.79024	6.91019	6.84016	7.34655	6.43294	7.20546	6.50386	7.61039	7.43343	7.35957	7.76574
Cd63	NM_001282966	2	5.89934	5.79738	5.89937	10.8957	10.7721	10.9437	10.984	11.134	10.9315	11.2294	11.1018	10.8846	11.4259	11.8539	11.8074	11.5631	11.602	11.1724	11.0211	9.75336	9.3463	10.4145	10.7612	10.1261	9.00064	10.5551	10.2557	9.93892	11.2491	10.5086	10.6283	10.0211	10.4042
Cd9	NM_007657	2	6.88031	7.18426	6.80738	11.3751	11.344	11.743	11.6891	11.9251	11.8913	10.9608	11.0906	11.2378	11.8897	11.2534	11.3968	10.4882	11.6934	10.7388	11.1405	9.77701	9.61282	9.64553	10.7917	9.51703	10.4817	10.0358	9.93012	9.69823	10.086	10.679	10.8863	10.3329	10.2282
Cda	NM_028176	2	5.64386	5.64386	5.64386	7.48425	7.86916	7.61773	7.30431	7.92547	7.31148	7.22539	7.703	7.70271	7.62869	7.48403	7.4947	7.13646	7.59386	6.83937	7.60862	6.42058	7.45502	7.55657	6.91639	8.13394	7.21493	7.53375	7.92122	7.68129	6.18269	7.39541	8.5365	7.58564	7.0641
Cdc42bpa	NM_001033285	2	5.89934	6.00079	5.80253	7.6087	7.14876	7.91378	7.55804	7.81277	7.32208	7.34073	8.09242	7.28125	7.85171	7.21839	7.30008	6.24629	7.48276	7.05469	7.62432	7.35858	7.70377	7.69512	7.65605	7.49594	8.23605	7.41169	8.06821	7.51632	6.8537	7.65948	7.75708	7.45429	6.77963
Cdc42bpg	NM_001033342	2	6.30489	5.86842	6.03345	8.79549	8.50877	8.62824	8.49453	8.65211	9.07787	8.52205	8.51861	8.5567	8.12747	8.16263	8.25031	7.85421	8.58894	8.35086	8.81815	8.47852	7.39968	7.40328	7.79393	7.54847	6.92332	8.1826	8.21429	7.80091	7.67209	8.03918	8.43773	8.52205	7.40715
Cdc42ep1	NM_027219	2	5.64386	5.64386	5.64386	8.09831	7.60929	7.70468	8.21193	8.02999	7.7166	7.76917	7.87007	7.87477	8.45002	7.51828	7.51115	6.66998	8.03298	6.71832	7.33106	8.15667	8.5324	8.52034	7.8371	7.71856	8.52936	8.20114	8.59019	8.2283	6.98841	7.84066	8.25343	8.01657	6.42494
Cdc42ep5	NM_021454	2	5.64386	5.64386	5.64386	10.1948	10.3876	10.4743	10.4727	10.4823	10.7678	9.73704	10.1256	10.0102	10.3715	9.99109	10.3577	8.73385	10.1008	9.63754	9.77162	8.26098	8.01126	8.04529	8.24237	9.02749	9.55102	8.7214	9.26254	8.3246	7.86656	9.1568	10.1266	9.5969	8.44849
Cdh1	NM_009864	2	5.64386	5.86842	5.75154	11.7076	11.1241	11.2071	11.4207	11.4978	11.676	11.2682	11.1287	10.5615	11.4681	10.7069	11.0785	9.86273	11.1752	11.2122	11.6034	10.0919	9.92357	9.03456	9.76908	10.1433	8.59423	10.1113	9.55456	9.23605	8.83053	9.70487	10.9985	10.3999	8.63385
Cdh17	NM_019753	2	5.64386	5.64386	5.64386	11.3416	11.2904	10.96	11.1773	11.0776	11.3399	11.0376	11.1042	10.7067	11.1636	9.68677	9.80446	9.11716	9.98331	11.0833	11.6386	10.4492	10.4516	10.1092	9.76908	10.6312	9.70582	10.8652	10.4612	10.0396	9.48759	9.68129	10.841	10.5279	8.29195
Cdhr2	NM_001033364	2	5.64386	5.64386	5.64386	10.5983	10.5245	10.2397	10.3324	10.971	10.5074	10.2463	10.3238	10.1212	10.1096	9.94147	9.68986	8.80523	10.0354	11.0586	10.7424	8.81189	8.35465	8.15912	8.39464	9.07302	8.34562	9.49738	8.896	8.52321	7.60656	8.68595	9.99113	9.51137	8.0527
Cdhr5	NM_001114322	2	5.64386	5.64386	5.69872	12.3684	12.2348	12.499	12.4074	12.6928	12.2883	11.7076	11.8518	11.8141	12.1644	11.7799	11.7056	10.9673	12.092	12.7246	12.6737	10.2008	9.9575	9.73085	10.4072	10.1475	9.04773	10.7281	10.1898	10.0855	9.16235	10.2286	11.9638	11.3423	9.34137
Cdk18	NM_008795	2	5.64386	5.64386	5.64386	7.67346	7.49539	8.18975	7.90148	8.29264	7.5464	7.80978	7.61609	7.67968	7.91124	7.08764	7.20211	6.78745	7.71679	8.26703	7.85468	7.47883	7.77073	7.7687	7.44898	7.06243	6.50438	7.87138	8.03999	7.33001	6.93603	7.61039	8.5799	8.04728	6.61316
Cdo1	NM_033037	2	5.77724	5.93612	5.80253	8.34091	7.23645	7.97335	7.81759	8.36294	8.30765	7.74843	7.87007	7.95367	8.68646	7.44894	7.68078	6.66998	7.96846	6.95104	7.56049	7.29448	7.42762	6.81188	7.06907	7.32583	7.68889	7.69943	8.03999	6.6478	6.98841	7.5069	8.50682	7.92029	6.42494
Cds1	NM_173370	2	7.35599	7.36708	7.62393	10.27	10.2003	10.3153	9.95929	10.5516	10.6665	10.0053	9.80647	9.74228	10.0605	9.67163	9.79105	9.12834	9.67506	10.0798	10.4527	9.10135	8.90454	8.69092	9.30651	9.40755	8.44745	9.40442	9.11475	9.0753	8.52835	9.18222	10.3373	9.90428	7.98614
Cdx1	NM_009880	2	5.64386	5.64386	5.64386	11.6787	11.0754	11.5877	11.4884	11.7966	11.4742	11.063	11.2405	11.0764	11.8665	10.7471	11.2166	9.57483	11.3626	10.1977	11.1364	9.60269	9.03738	8.9342	9.54001	9.69648	9.34025	9.67371	9.94161	8.9558	8.59744	9.3635	10.9972	10.4753	8.63385
Cdx2	NM_007673	2	5.7121	5.64386	5.64386	9.73033	8.69573	9.8332	9.36895	9.93519	9.5927	9.86299	9.85852	8.94251	10.102	9.07761	9.26899	8.12362	8.97291	10.6423	9.6233	8.616	8.42563	8.15912	9.16117	8.66079	8.21969	8.7214	8.61909	8.17024	7.50233	8.54938	10.1484	9.34209	7.91635
Ceacam10	NM_007675	2	5.77724	5.72266	5.64386	9.5489	7.86916	9.11982	8.16178	9.78539	8.98428	9.90576	8.23924	9.51725	9.767	8.34543	8.72261	7.65222	8.92271	8.70958	9.23077	8.35826	8.15187	7.33224	8.47884	8.32671	7.24757	8.92476	7.2422	7.30324	7.6397	6.44624	7.53983	8.07736	6.20842
Cep170b	NM_001024602	2	5.64386	5.72266	5.75154	7.95976	7.5189	8.55212	8.09207	8.14086	7.76398	7.49811	7.38327	7.53324	8.34167	7.84947	8.13823	7.18007	7.88353	8.17801	7.42367	6.74225	6.48575	6.21719	6.91639	6.94979	6.06596	6.92376	6.55764	6.51415	6.08984	7.21014	7.9678	7.47703	7.30162
Cers4	NM_026058	2	6.30489	6.33766	6.62116	9.49616	9.81037	9.35303	9.48227	9.81913	9.89538	9.23904	9.56101	9.47106	9.63197	8.41978	8.62769	8.03137	9.12124	8.77174	9.51802	8.74151	8.42563	8.23896	7.95938	8.28088	7.66493	8.454	8.58042	8.396	7.38998	8.24616	8.66969	8.16399	7.91635
Ces1f	NM_144930	2	5.64386	5.64386	5.64386	8.39569	7.90529	7.99651	7.86014	8.79458	7.7166	8.83894	8.41944	8.0909	8.74653	7.17611	7.30008	6.66998	7.59386	7.69121	8.56521	6.83531	7.28219	6.70347	6.4443	7.54847	5.9116	7.20672	7.99659	7.39482	6.53941	6.74805	7.71876	7.03119	6.61316
Ces2a	NM_133960	2	5.64386	5.64386	5.64386	9.54198	9.62239	9.65181	9.56178	9.90802	9.20347	9.01424	9.19481	9.16606	9.29465	8.66878	8.42549	7.65222	8.789	10.3378	9.72507	8.12015	7.45502	8.01537	7.30263	8.58738	8.21969	8.60088	8.65675	8.81133	7.79483	7.86178	8.86947	8.10681	6.42494
Ces2e	NM_172759	2	5.64386	5.64386	5.64386	10.3594	9.94229	10.4089	10.0722	10.9116	10.6912	10.4559	10.1614	9.57454	10.2774	9.05446	8.7916	8.2518	8.98111	11.1136	10.8958	9.72931	9.60672	9.42431	9.57869	9.87161	8.85999	10.4811	9.94541	9.73123	8.7031	9.3411	10.8395	9.80443	7.50549
Cfb	NM_008198	2	7.22199	7.0067	7.25448	9.84723	9.69643	9.93261	9.93958	9.73768	9.77527	9.18604	9.03982	9.39888	9.67382	10.0272	10.0467	9.66201	10.0156	8.80184	9.61547	9.56243	8.96297	10.4059	10.8376	10.2738	8.51603	10.4887	9.05254	8.88988	11.6788	9.52452	10.0719	9.86603	9.17203
Cftr	NM_021050	2	5.64386	5.72266	5.64386	9.43022	8.53207	8.23914	8.98263	9.21773	8.95736	9.48456	9.4321	8.94251	9.17831	7.92801	8.09522	7.45326	8.8707	8.70958	9.25617	8.71727	7.95478	7.57719	7.36297	8.70774	7.14737	8.49965	8.28815	7.41995	7.5897	8.19713	8.78545	8.77237	7.30162
Cgn	NM_001037711	2	5.64386	5.64386	5.64386	9.46723	8.80496	9.17669	9.10268	9.32141	9.2788	8.76858	8.8357	8.85786	9.04114	8.65345	8.87662	7.52268	9.02142	8.99663	9.38614	8.00471	7.93545	7.7687	7.89954	7.20013	7.00193	8.1826	7.74009	7.68129	7.0878	7.65948	8.73514	8.2849	6.92887
Chchd10	NM_175329	2	6.93843	6.8749	6.88038	12.7045	12.5887	13.0926	12.6205	12.6957	12.5395	12.4998	12.7889	12.5425	12.7942	11.8199	12.1186	10.5766	11.9561	12.6271	12.6538	10.6353	10.9427	10.1546	11.2666	10.8973	11.1372	10.9333	10.7841	10.7239	10.0648	10.9019	11.2633	10.9376	10.0604
Chdh	NM_001136240	2	6.72383	6.33766	5.80253	9.0988	8.82396	8.86686	9.1377	8.67071	8.64788	9.10678	8.41944	8.48546	8.75305	8.00248	8.30796	7.71287	8.57817	8.35086	8.60531	7.47883	7.74875	7.00694	7.607	7.98944	6.92332	8.1255	7.74009	7.40745	6.67344	7.53347	8.64265	8.38449	7.50549
Chga	NM_007693	2	5.64386	5.64386	5.64386	7.39488	7.29209	8.04175	7.96135	8.0009	7.38404	6.28586	7.20417	8.12539	8.73997	7.51828	7.80611	6.66998	8.75115	6.27888	6.88653	5.64386	6.19204	6.21719	6.87555	5.98609	6.44933	6.45261	6.84548	7.28968	5.99059	6.50114	8.5365	7.14915	5.95359
Chp2	NM_027363	2	5.64386	5.64386	5.64386	9.75747	10.1142	10.4003	9.22983	9.78539	9.52785	9.8533	10.0629	9.7227	9.64956	8.77174	8.46827	8.71914	9.60781	10.055	9.72143	7.29448	8.51948	8.10333	8.47884	8.23354	7.66493	8.77189	8.39229	8.92541	7.70377	8.12906	8.40592	8.82649	6.92887
Cideb	NM_009894	2	6.0119	5.79738	5.64386	9.4599	9.50956	9.65546	9.31643	9.54954	9.35039	8.72678	9.2736	9.1702	9.19757	8.60647	8.70841	8.21033	8.64161	9.07268	9.53472	8.08269	7.79238	8.00017	7.65605	8.34167	7.45741	8.82067	8.88017	8.40861	8.00013	8.14638	9.617	8.62744	7.30162
Cidec	NM_178373	2	5.64386	5.64386	5.64386	5.88171	6.01843	6.00527	6.44535	6.1994	6.37105	5.81322	6.14384	6.19158	6.23458	5.76291	5.91519	5.64386	5.72421	7.81446	6.35797	6.15779	6.48575	6.21719	5.73798	5.73731	5.82774	6.32315	7.92122	6.05018	5.82762	6.13525	6.02505	5.72208	5.64386
Cisd3	NM_001085500	2	7.39803	7.31717	7.15991	11.0304	10.9141	11.0881	10.8584	11.0334	10.9581	10.8163	11.2426	11.1547	11.0908	9.16668	9.82764	8.54659	9.8906	10.5389	10.6322	9.61587	9.20009	9.249	9.38862	10.1602	9.16341	10.0461	10.3158	9.58336	9.03738	8.72106	10.2481	9.28525	7.98614
Cited4	NM_019563	2	5.83958	6.06268	5.94544	7.92826	6.95553	7.90155	7.99992	7.84589	8.09563	7.59424	7.99933	8.04659	8.45002	7.48403	7.69526	6.84278	7.98486	5.88792	7.4765	7.22739	6.81675	7.03703	6.4991	7.13293	7.21493	7.09218	6.84548	6.78953	6.8537	6.83609	7.40153	6.93591	6.77963
Ckmt1	NM_009897	2	5.64386	5.64386	5.64386	14.4845	14.4516	14.2783	14.5435	14.342	13.9706	13.5095	13.2936	13.9828	14.0558	13.5761	13.7926	12.626	13.8819	13.4656	14.0298	11.4269	11.3601	10.8555	10.8949	11.3294	9.769	11.6249	11.3446	10.9478	10.012	10.6213	11.7961	11.0442	9.75523
Clca1	NM_017474	2	5.64386	5.64386	5.64386	12.0904	11.5392	11.2949	11.638	12.059	11.4173	13.3252	7.77699	10.8808	12.5218	14.2457	14.7899	12.1816	14.1135	10.3275	13.157	10.2523	10.0276	9.01201	10.212	8.31159	7.59056	10.3708	10.1866	9.27789	6.76638	12.0137	13.1393	12.3462	12.0542
Clca3b	NM_139148	2	5.64386	5.64386	5.64386	11.1905	9.81987	10.6903	9.78251	11.4474	10.7966	11.2754	9.85852	10.1529	11.1951	10.0912	10.8838	9.59108	11.5806	9.47889	10.9372	10.9688	10.9997	10.0292	11.4004	11.8872	10.2756	10.9878	10.274	9.66708	9.89684	10.2726	11.6578	11.391	9.44414
Cldn12	NM_022890	2	5.83958	5.79738	5.75154	8.02077	7.69435	7.10266	7.55804	7.67219	7.91853	7.59424	7.64272	7.48092	7.33031	7.44894	7.68078	6.78745	7.67697	6.95104	7.71506	6.83531	6.85839	6.58625	6.32805	6.73998	6.75193	7.50419	6.90927	7.03701	6.67344	7.1768	7.85455	7.28421	6.92887
Cldn15	NM_021719	2	7.2452	7.31717	7.32591	9.67446	8.91537	9.62606	9.0668	10.0986	9.06846	10.0819	10.2067	9.23875	10.3651	9.07761	9.5173	8.23121	9.55387	9.16822	9.38153	9.50694	9.4107	9.10017	9.83446	10.0278	9.21383	10.1783	10.0658	9.62448	8.7031	9.90132	11.4483	10.9619	8.67669
Cldn2	NM_016675	2	5.64386	5.64386	5.64386	9.16336	8.05754	8.41273	9.02064	9.27962	9.12096	8.75824	9.17062	8.95694	9.5102	8.02648	8.29851	7.74227	9.57026	6.27888	8.5894	8.87899	8.36913	7.12372	7.85822	8.23354	7.59056	8.54391	8.26395	7.40745	8.0379	9.11342	10.3117	9.87033	7.6841
Cldn3	NM_009902	2	5.64386	5.64386	5.64386	12.1728	12.0312	11.8777	12.3225	12.4727	12.425	11.7603	11.3482	11.918	12.2648	11.8755	11.9241	10.4397	11.8096	11.6897	12.1127	10.0729	9.88883	9.50188	9.72953	10.6312	9.46344	10.4505	10.6644	9.80224	9.04976	10.3936	12.2035	11.4192	9.4929
Cldn4	NM_009903	2	5.64386	5.64386	5.64386	7.23242	6.81066	6.50255	7.20875	7.00324	6.74616	6.92622	6.67785	6.66002	6.90764	7.25947	7.28101	6.54209	6.85633	8.61101	7.35006	6.15779	6.05546	6.36686	6.74561	6.86949	5.82774	6.45261	6.67241	6.28714	6.22697	6.32975	8.38976	7.06159	5.95359
Cldn7	NM_016887	2	5.64386	5.72266	5.64386	13.5477	13.6806	14.2496	13.2996	13.4921	13.387	13.1554	13.5391	13.4322	13.5796	13.0232	13.0463	11.9413	13.451	14.0255	13.2658	11.6924	11.5907	11.1675	12.8118	12.5313	11.8267	12.3113	12.3581	11.8062	11.1274	12.2353	13.4519	13.1203	11.0011
Clec2h	NM_053165	2	5.64386	5.64386	5.64386	10.4453	10.7843	10.4409	10.2745	10.9859	10.9521	10.0526	10.1736	10.4554	10.4378	9.53613	10.0153	8.92544	9.68513	10.9213	11.1337	9.75336	9.60672	9.53389	10.1144	10.2262	9.69403	10.6594	10.0866	10.0254	9.70276	9.31069	10.829	9.89164	8.87368
Clic5	NM_172621	2	5.7121	5.64386	5.64386	8.92881	9.11369	8.47177	8.59873	8.8281	9.50943	8.71613	8.67299	8.68941	8.35888	8.43779	7.93368	7.45326	8.23846	8.08314	8.8452	8.22704	8.50644	7.73238	7.65605	7.02586	7.98825	8.43845	8.48942	8.31123	7.38998	7.61039	8.10287	8.04728	7.50549
Clmp	NM_133733	2	5.89934	6.33766	6.19478	8.59609	8.8795	9.07156	8.58611	8.33989	8.67705	7.90657	8.01979	8.0909	8.87168	9.32984	8.72261	8.36951	8.80756	8.35086	8.19663	8.04422	8.50644	9.40136	8.47884	8.0635	8.00744	9.13224	9.53952	9.0594	8.39886	9.81187	8.64946	8.66753	8.39818
Clrn3	NM_178669	2	5.64386	5.64386	5.64386	9.05571	9.05861	8.57538	8.92365	9.22404	9.35039	8.80921	9.09871	8.41052	9.14399	8.14081	8.44275	7.98294	8.40616	8.4301	9.56757	8.12015	7.60935	7.35631	6.9561	8.09915	7.34126	8.06604	7.95184	7.64977	7.13504	7.39541	8.70279	8.68717	6.61316
Clstn1	NM_023051	2	6.0119	6.12203	6.19478	9.73033	9.11369	9.43584	9.41963	9.6929	8.93684	8.97014	9.31557	9.30796	9.80202	9.33945	9.41169	8.36951	9.69513	8.61101	9.21011	8.81189	8.6076	8.80899	8.75131	8.84004	8.91181	9.10296	8.84797	8.51157	8.51948	9.1396	9.93095	9.29808	8.98013
Cltb	NM_028870	2	7.98543	8.04073	7.77194	10.5247	10.1931	10.6342	10.3248	10.3983	10.3378	9.96539	10.3114	10.1962	10.7771	10.365	10.6896	9.86941	10.689	10.055	10.1094	8.90068	8.71351	8.86038	8.82823	8.91197	9.39953	9.22577	9.63696	8.88988	8.52835	9.52452	10.3309	9.62771	8.83638
Clu	NM_013492	2	5.64386	5.72266	5.64386	8.13556	7.71485	7.99651	8.16178	8.15413	7.60828	6.92622	8.29626	8.563	8.34167	8.02648	8.11688	6.40175	8.19682	8.64462	7.74409	7.22739	8.15187	8.0746	7.63174	8.23354	6.96315	8.66907	7.59243	6.51415	8.74937	6.87816	7.53983	7.14915	6.20842
Cluh	NM_001081158	2	8.52061	8.38157	8.49965	9.7181	8.87039	9.72297	9.46859	9.35054	9.05583	9.53387	9.04648	8.98069	9.73111	9.37726	9.66801	9.01247	9.68513	8.54134	9.14632	9.26081	8.89456	8.82632	9.61014	8.79728	7.94911	8.93587	9.05254	8.40861	7.93489	9.37823	10.5757	10.0928	8.34604
Cmbl	NM_181588	2	5.64386	5.64386	5.64386	9.05085	9.30164	9.45687	9.0938	9.09229	9.47899	8.88718	8.93599	9.18662	9.22128	7.95326	8.1276	7.04505	8.01711	9.14492	9.07957	8.32656	7.60935	7.8557	7.55623	8.00832	7.34126	8.57268	8.21429	8.31793	7.33034	7.77535	8.62204	8.12132	6.92887
Cmtm4	NM_153582	2	6.43172	6.43448	6.78221	9.92111	9.52706	9.9682	9.93461	9.90802	10.061	9.61058	9.43718	9.28144	9.82696	8.88107	9.44205	8.14579	9.52612	8.88856	9.78216	8.41964	8.20126	7.93774	8.47884	8.37113	7.96882	8.60088	8.26395	7.8572	7.79483	8.27795	8.85187	8.66753	8.0527
Cobl	NM_001282994	2	5.64386	5.64386	5.64386	7.87417	8.4851	8.08561	8.1954	8.18032	8.52949	7.72738	7.89982	7.58372	7.77687	7.25947	7.35581	6.66998	7.69702	7.75415	7.90694	6.64279	6.81675	6.41349	7.36297	7.16692	6.44933	7.56272	6.74415	6.91857	6.35219	6.38917	7.58314	7.28421	6.20842
Col16a1	NM_028266	2	5.64386	5.64386	5.64386	7.33208	7.05538	7.6326	7.50538	7.47469	6.66529	6.28586	6.71177	7.54602	7.78962	8.4905	7.72378	6.16179	7.75554	6.27888	7.05812	6.42058	7.0858	7.71387	7.30263	6.82759	5.99084	6.92376	7.13953	7.20546	6.82518	7.24271	7.28397	6.76166	6.20842
Col1a2	NM_007743	2	5.64386	5.64386	5.64386	9.3253	8.72635	9.39285	9.0938	8.15413	7.86883	7.54697	8.7848	9.28525	10.0178	11.5715	10.7445	8.62758	9.9036	7.40777	8.74107	8.81189	9.26347	9.22306	8.58397	8.2011	8.79524	9.91747	9.65102	9.6486	6.76638	10.4815	9.86523	9.6479	9.58575
Coq8a	NM_023341	2	6.30489	6.38688	6.23243	8.29225	7.58722	7.79991	8.35271	8.31646	8.93338	7.74843	8.55178	8.45188	7.89953	7.76642	7.79271	7.38034	8.09473	6.95104	7.54408	7.53538	7.99267	7.4262	7.03239	8.46975	8.21969	7.64629	7.85796	7.56219	6.70509	7.70694	8.1988	7.93679	7.59756
Cox7b	NM_025379	2	10.0397	10.1322	9.66439	12.6944	13.006	12.8491	11.9867	12.0323	12.8138	12.9595	13.0546	12.808	12.0624	11.9242	12.2389	11.6892	12.6116	12.3626	12.7615	12.2289	11.5642	11.3598	11.5061	11.6762	9.84561	12.204	11.8102	11.5719	11.5562	11.6852	12.2412	12.3354	11.3041
Cpd	NM_007754	2	6.51049	7.26547	7.15991	9.76937	9.10595	9.17161	9.70291	9.64197	9.77912	9.45925	9.1051	9.28906	9.5482	8.94541	9.06117	8.91257	10.0116	8.39102	9.4225	8.8346	8.9534	8.40969	7.93971	8.13394	7.3107	8.92476	8.86416	7.98899	8.00013	8.66206	8.85187	9.04007	8.0527
Cpm	NM_027468	2	5.77724	5.64386	5.69872	8.12634	7.17859	8.10704	8.68412	8.19324	8.72971	7.80978	7.89982	7.72537	7.92286	7.82232	7.57517	6.72991	7.86592	6.27888	7.21147	7.29448	6.85839	6.54496	6.4443	6.94979	7.14737	6.62732	6.74415	6.68973	5.82762	6.74805	7.21223	7.23169	7.0641
Cpped1	NM_146067	2	7.84052	7.26547	7.44298	9.5489	9.38076	9.37086	9.30107	9.40709	9.72229	9.50942	9.31557	9.23481	9.47906	8.75748	8.9629	8.31186	9.18651	8.13135	9.28114	8.71727	8.73603	8.14537	8.01685	8.63673	8.0635	8.68233	8.69346	8.52321	7.5897	8.42714	9.16379	9.15029	8.23576
Crb3	NM_177638	2	5.64386	5.64386	5.64386	9.19017	8.92421	9.63346	9.18868	9.62777	9.23464	9.03152	8.69011	8.8372	9.77664	8.86784	9.04995	7.90709	9.02142	9.27937	9.27121	7.22739	7.45502	6.9762	8.30522	7.20013	6.96315	7.98275	7.68648	7.39482	6.8537	7.73011	8.80387	8.17794	6.61316
Creb3l4	NM_030080	2	5.83958	5.64386	5.80253	8.01078	7.79407	7.24483	7.99992	7.92547	7.22384	7.97957	8.04663	7.5587	8.05542	7.9023	7.88399	6.99708	7.86592	6.0966	7.57671	6.64279	6.25575	6.26883	6.79024	7.06243	6.65794	7.05187	6.97037	6.39247	6.5741	6.91905	7.86628	7.17719	6.42494
Crim1	NM_015800	2	5.83958	6.00079	5.69872	8.06971	8.0735	8.42985	7.77374	7.81277	7.72461	7.2551	7.67747	7.83364	7.87582	7.33826	7.2421	7.22241	7.69702	7.242	7.54408	7.78904	8.04771	7.61758	7.77185	7.69546	7.80307	8.06604	8.47894	7.86637	6.98841	7.65948	7.69264	7.86964	6.92887
Cth	NM_145953	2	5.64386	5.79738	5.64386	9.56606	8.52047	9.19182	9.51593	9.93903	9.55504	9.17054	9.33747	8.92303	9.91975	8.09616	8.51797	7.26354	8.55639	8.77174	9.06239	8.19228	7.63354	7.53564	7.99795	7.95093	7.66493	8.06604	8.36979	7.67087	7.55539	8.02051	9.47478	8.73512	6.92887
Ctnnd1	NM_007615	2	7.26805	7.55108	7.50585	9.89419	8.87039	9.52615	10.16	10.0497	10.0923	9.66693	9.2507	9.25831	10.1273	9.07761	9.16362	9.20424	9.6131	10.1162	9.80644	9.11996	8.99133	8.79144	8.71705	8.99946	7.90887	9.24377	8.80668	8.58006	8.48342	8.88482	9.73689	9.55477	8.44849
Cttn	NM_007803	2	5.7121	5.64386	5.64386	9.08458	8.57756	8.86686	8.91359	9.30959	9.03022	8.59357	8.19194	8.28647	9.01425	8.2053	8.39034	7.41726	7.95187	8.4301	8.82496	7.92227	7.85544	7.63736	8.19336	7.41339	7.66493	8.06604	7.40597	7.27598	7.11162	7.14268	8.23545	7.56456	6.92887
Cx3cl1	NM_009142	2	5.64386	5.64386	5.64386	8.616	7.88734	8.17967	8.24442	8.75155	8.5111	7.99726	7.37271	7.54602	8.73339	8.16263	8.20044	7.26354	7.98486	7.98159	8.04162	6.74225	7.01391	6.9127	7.06907	6.49437	6.88234	7.53375	6.74415	7.10056	6.50386	7.24271	8.0829	7.40771	6.42494
Cxadr	NM_001025192	2	5.64386	5.64386	5.69872	9.7987	9.26734	9.07156	9.21351	9.30959	9.65057	8.99676	9.21565	9.23085	9.00335	8.32622	8.29851	7.68287	8.54537	8.99663	9.65038	8.19228	7.53425	7.30777	7.53016	7.97032	6.65794	8.57268	7.88994	7.79131	7.01391	7.55957	8.17068	8.13568	7.18774
Cyb561	NM_007805	2	5.64386	5.64386	5.69872	9.70886	9.33513	9.90534	9.50256	9.61822	9.80578	9.14696	9.3293	8.99007	9.6943	8.69896	9.16362	8.12362	9.47478	8.74099	9.4359	8.64199	8.4666	8.40969	7.87903	8.54923	8.0997	8.64219	8.72039	8.00569	7.60656	8.30904	9.12035	8.55448	7.40715
Cyp2d22	NM_001163472	2	5.64386	5.64386	5.64386	7.24952	7.73507	7.66186	8.14466	7.86215	7.25733	6.8888	7.04025	7.60831	7.44754	7.73764	7.42693	6.72991	7.25829	7.15138	7.40562	7.22739	7.28219	7.17874	6.38735	7.59915	8.0635	7.61897	7.72245	7.23408	6.60798	6.70192	7.41757	6.96837	7.0641
Cyp2j6	NM_010008	2	5.64386	5.64386	5.64386	9.02129	8.39903	8.55212	8.77589	8.93965	9.46711	8.95211	8.79275	8.75697	9.11895	7.87613	7.99347	7.52268	8.12464	7.69121	9.40897	8.08269	7.95478	7.87248	7.33311	8.26527	8.0635	8.73419	8.20161	8.29094	7.28917	7.84066	8.92101	8.51107	6.42494
Cyp2s1	NM_028775	2	5.64386	5.64386	5.64386	8.73001	8.77598	9.09857	9.11152	8.93965	9.37603	8.57012	8.8357	8.64255	8.8167	8.02648	8.02819	7.04505	8.30529	9.30061	8.39266	7.22739	7.01391	6.77664	7.10484	7.35561	6.44933	7.72529	7.49183	7.30324	6.60798	7.47982	8.62204	7.9036	6.92887
Cyp3a13	NM_007819	2	5.64386	5.64386	5.64386	8.37247	8.59978	7.67627	8.33772	8.62376	9.15097	7.92517	8.22755	8.0996	7.94581	7.08764	6.95987	7.04505	7.48276	8.35086	8.80444	7.35858	7.15428	7.25754	6.69957	6.98832	6.79671	7.98275	7.31468	7.23408	6.5741	6.38917	7.74442	7.30977	5.64386
Cyp4f14	NM_001204336	2	5.77724	5.79738	5.75154	9.15884	8.42415	9.35303	9.08485	9.4984	9.1569	8.88718	8.83954	8.47881	9.23533	8.34543	7.95789	7.52268	8.13937	10.3275	9.84379	8.50709	8.72482	8.49888	8.99954	9.23401	8.41908	9.9939	9.05959	8.77283	7.53792	8.18041	10.1532	9.28525	6.92887
Cyp51	NM_020010	2	7.47859	7.39141	7.15991	10.1178	9.78635	8.89178	9.83145	9.84392	9.87933	9.9151	9.29893	9.25442	10.1096	9.54446	9.88243	9.47329	10.0156	9.02243	9.70676	8.92205	9.13381	8.15912	8.24237	7.91137	7.82486	9.01136	8.4254	8.18497	8.45578	9.05957	9.65808	9.37273	8.94552
Cyr61	NM_010516	2	5.64386	5.72266	5.64386	9.44143	9.41248	9.69493	10.0262	9.02161	8.44964	8.89664	9.53992	9.98464	10.0865	10.1081	9.74656	8.46076	8.67232	10.408	9.59172	9.72931	9.93821	9.96017	9.49354	10.156	9.36276	10.183	10.2891	9.7487	9.03738	8.98451	10.184	9.41456	9.04698
Dag1	NM_010017	2	8.23775	8.08615	8.1908	10.6313	9.92039	10.6886	10.3018	10.5032	10.4934	10.2425	10.2052	10.0444	10.9056	10.0331	10.2758	9.34503	10.2843	9.25782	10.1933	9.60269	9.74636	9.42431	10.0699	9.56243	9.43538	9.98858	9.75886	9.48259	8.67939	9.68722	10.6403	9.96184	8.67669
Dapk2	NM_010019	2	5.83958	5.64386	5.64386	7.46973	6.73236	7.46005	7.79583	7.86215	7.9598	7.74843	7.19219	6.7947	8.27072	7.55172	8.07322	6.99708	8.22472	7.928	7.71506	6.83531	7.15428	6.66545	7.39221	6.86949	6.88234	7.27833	6.38886	6.25957	6.8537	7.21014	7.9678	7.38384	7.0641
Dbndd2	NM_026797	2	7.3345	7.31717	7.7591	8.89662	8.86122	9.18175	9.05768	9.04318	9.32165	8.62804	8.95028	8.72921	9.21657	9.64088	9.5535	9.316	9.53728	8.86023	9.12992	8.29414	8.31032	8.71904	9.04629	8.51004	8.68042	9.15144	9.2065	8.94718	9.02489	9.30299	9.67819	9.16436	8.94552
Dcbld1	NM_025705	2	5.64386	5.72266	5.64386	7.49862	7.39732	6.96854	7.30431	7.70864	7.53733	7.76917	7.41452	7.6325	7.86381	6.6669	7.1817	6.47362	7.45948	6.83937	7.63985	7.58981	7.37119	7.03703	6.69957	7.26435	7.66493	7.41169	7.40597	6.97052	6.70509	7.14268	7.66603	7.45429	6.61316
Dcn	NM_001190451	2	5.64386	5.64386	5.64386	9.92111	9.69126	9.61113	10.0857	8.83636	8.43508	7.64	9.0498	10.6633	10.4029	11.8935	10.7687	9.13943	10.0857	7.87235	8.88483	9.35809	8.6076	9.5233	8.07211	8.4833	9.46344	10.3166	10.1671	9.81887	6.73606	10.6938	9.85053	10.1363	9.71469
Ddah1	NM_026993	2	5.64386	5.64386	5.64386	9.58302	8.80496	8.89795	8.83042	9.51394	9.52556	9.66693	8.92519	8.38228	9.51404	8.45557	8.53417	7.74227	8.85294	8.86023	9.6076	7.83484	7.53425	6.74052	7.17383	6.73998	7.24757	8.10595	8.16287	7.83868	7.22512	7.55957	9.05007	8.51107	6.92887
Ddit4	NM_029083	2	7.95758	7.15614	7.17932	8.88025	8.79536	9.46934	8.94358	8.88495	8.909	8.40765	7.91446	8.94251	9.53312	9.25056	9.83092	9.54177	9.43951	7.87235	8.74825	8.19228	9.00066	8.36293	8.77371	8.96123	8.88094	8.89089	8.65675	8.5174	7.90794	8.38398	9.40812	8.79064	8.23576
Decr1	NM_026172	2	6.5483	7.03785	6.47171	9.04106	8.76619	8.63563	8.63595	8.84457	8.8109	8.62804	8.66001	8.8215	8.65894	7.55172	7.83254	7.30353	7.63602	9.02243	9.12992	8.47852	8.01126	8.39814	7.85822	7.76369	7.64057	8.70849	8.49982	8.34442	7.62322	7.63514	8.30608	8.34794	7.0641
Degs2	NM_027299	2	5.64386	5.64386	5.64386	10.6016	9.91597	11.0582	10.5066	10.8477	11.0325	10.4812	10.4193	10.2499	11.22	9.78147	10.2637	8.76283	10.4202	10.4935	10.4788	8.71727	8.72482	7.73238	9.29881	9.01821	9.04773	9.3473	9.26254	8.90331	8.14563	9.0504	10.5952	9.92923	7.50549
Dhcr24	NM_053272	2	6.58516	6.48056	6.19478	9.49974	9.67042	9.91145	9.25397	9.44539	9.38616	8.99676	9.03313	8.52475	9.26757	9.25056	9.30247	8.56315	9.53728	9.32154	9.07387	7.64225	8.04771	7.55657	8.46515	7.76369	7.96882	8.43845	8.57059	7.62837	6.88166	8.67405	9.39603	9.25925	7.50549
Dhrs11	NM_177564	2	6.69039	6.69116	6.75658	8.71162	8.67495	8.49635	9.02064	8.91646	8.45446	8.22453	8.30183	8.27882	8.82291	8.75748	8.70841	7.95809	8.53427	9.07268	8.74825	7.64225	7.77073	7.71387	7.607	7.84992	7.07647	7.87138	8.38108	7.87548	7.3099	8.29358	9.50136	8.86148	6.77963
Dlg3	NM_001177780	2	6.0119	5.93612	5.85175	8.43358	8.47311	8.67205	8.50797	8.65211	8.80714	8.60515	7.90716	8.4175	8.55826	8.41978	8.3634	7.79933	8.53427	7.40777	8.41088	6.83531	7.39968	7.0954	7.47655	7.80745	6.92332	8.06604	7.87403	7.51632	6.43002	7.47982	8.36515	7.9036	7.30162
Dmbt1	NM_007769	2	5.64386	5.64386	5.69872	14.0542	13.4023	13.9059	13.6182	14.1067	14.3743	14.0251	13.6729	13.0311	13.8552	12.9205	12.9473	12.3	13.0889	13.7134	14.5179	13.2669	12.7519	11.8634	13.0935	12.5564	10.9689	13.3213	11.2706	11.5436	11.3173	12.5406	13.719	12.9412	11.3177
Dnajc22	NM_176835	2	5.64386	5.64386	5.64386	8.84694	8.43654	8.62081	8.33772	8.58507	8.70159	8.52205	8.36717	8.17562	8.88955	7.37611	7.88399	7.18007	7.63602	8.13135	8.70462	7.41995	7.42762	7.06651	7.58184	7.62384	7.03969	7.89435	8.0112	7.16143	6.67344	7.10773	8.52174	8.07736	6.77963
Dnmbp	NM_028029	2	6.99431	6.90899	6.80738	9.22515	8.46103	9.01598	9.1549	9.07843	9.30573	8.75824	8.32942	8.72359	8.93615	8.34543	8.61252	7.82703	8.55639	9.09716	9.19967	8.44938	7.31247	7.88908	8.58397	8.44226	7.86748	8.32467	7.93661	8.02219	7.4842	7.94333	8.71582	8.29773	7.6841
Dock9	NM_001081039	2	5.64386	5.64386	5.69872	6.74627	6.77204	7.08116	7.39394	7.29457	7.53733	7.44754	6.74493	7.5587	7.27699	6.83937	7.13998	6.32612	6.66602	6.58616	6.91233	6.83531	7.50833	7.47098	6.4991	7.38479	7.88832	7.44318	7.85796	7.20546	6.82518	6.74805	7.09744	6.64602	5.64386
Dok4	NM_053246	2	6.06506	6.00079	5.94544	10.1432	9.89815	10.2421	10.1211	10.3268	10.3101	9.70511	9.61356	9.63265	9.7573	9.40498	9.35355	8.64325	9.70507	9.95135	10.0053	8.5351	8.7582	8.62311	8.47884	8.29632	7.66493	8.95784	8.59019	8.64544	7.22512	8.56234	9.87106	8.94541	7.59756
Dpep1	NM_007876	2	5.64386	5.64386	5.64386	10.5474	10.0551	10.523	10.1642	11.185	9.88827	10.205	11.1774	10.1613	10.9303	10.1524	9.81112	9.13943	10.1742	11.4588	10.7901	7.78904	7.55972	7.88908	7.8371	8.11665	8.71584	8.68233	8.78133	8.64544	7.50233	8.73257	9.90274	9.05526	7.84301
Dpt	NM_019759	2	5.64386	5.64386	5.64386	8.06971	7.67355	7.70468	8.63595	7.76165	7.08149	6.49953	8.07948	8.6485	9.13402	10.8347	9.89189	8.33133	9.01345	6.71832	7.56049	7.29448	6.72966	7.17874	6.32805	6.54696	5.82774	7.27833	6.94014	6.75043	6.26993	8.26214	7.80663	8.4549	8.54415
Dsc2	NM_013505	2	5.64386	5.64386	5.64386	8.86369	8.18057	8.52849	8.52129	8.98493	8.94371	8.63935	8.23924	8.08214	8.96453	7.44894	8.01671	7.04505	7.88353	8.08314	9.08525	7.69287	7.72644	6.6264	7.39221	7.49594	7.21493	8.1255	7.42792	7.14645	6.82518	7.21014	8.18949	8.00096	6.42494
Dsg2	NM_007883	2	5.64386	5.64386	5.64386	10.2468	10.2678	10.0943	9.84211	10.1525	10.7956	10.2351	10.0246	9.89752	9.9456	8.82744	8.92655	8.52982	9.5205	9.91048	10.4394	9.24394	8.51948	7.90548	8.73998	8.61227	8.16948	9.26155	8.41445	8.38328	8.12238	8.72106	9.53483	9.40273	7.76574
Dsp	NM_023842	2	5.64386	5.72266	5.64386	9.8246	9.86643	10.0943	9.93958	9.99913	10.2832	9.50325	9.59322	9.33768	9.83313	8.8545	9.20467	7.55617	9.12124	9.92423	10.101	8.90068	8.27999	7.69512	8.42326	8.34167	7.78095	8.55837	7.77476	7.87548	7.28917	7.68341	8.71582	8.37241	7.30162
Dusp16	NM_130447	2	5.83958	5.93612	6.11636	7.92826	7.65244	7.46005	7.58366	7.76165	7.47226	7.74843	7.01329	7.71409	7.73794	8.30676	8.13823	8.68926	8.52308	8.35086	7.52748	8.15667	7.63354	7.35631	7.55623	7.62384	7.14737	7.47401	7.8417	7.26215	7.78005	7.39541	7.86628	8.04728	7.59756
Dusp8	NM_008748	2	5.64386	5.64386	5.64386	7.73545	6.46826	7.47662	7.98076	7.1953	6.68184	7.13239	7.41452	7.76966	7.46353	8.24675	7.62138	7.85421	7.45948	8.86023	7.68545	6.53596	7.18733	7.25754	6.83352	7.62384	6.50438	7.13137	7.26677	6.9361	7.22512	7.24271	7.98942	7.43119	7.40715
Dynll2	NM_026556	2	8.30557	8.5531	8.50735	10.1613	9.75205	10.3061	9.9739	10.1393	9.74608	10.014	10.0793	10.0712	10.5413	10.1305	10.3691	9.48203	10.3073	10.0674	9.63497	9.64186	9.64292	9.53389	9.74094	10.0507	9.47726	9.99921	10.0232	9.4029	9.90367	10.0141	10.9852	10.4118	9.31449
Echdc2	NM_026728	2	5.64386	5.64386	5.64386	8.30048	7.65244	7.9379	7.99992	8.32822	7.91154	7.78962	7.90716	8.14233	8.55826	7.92801	7.99347	6.72991	8.35661	7.32727	7.60862	7.53538	7.55972	8.10333	8.35062	8.21741	7.64057	8.32467	7.93661	7.11602	8.31929	7.73011	8.3232	7.47703	7.0641
Edn1	NM_010104	2	5.7121	5.64386	5.69872	8.54162	9.23222	8.92234	9.18868	8.38563	9.46233	8.43386	8.92157	9.30796	9.29911	8.5579	7.9817	6.84278	8.25207	10.5742	8.61319	8.92205	9.13381	8.42114	8.42326	8.82947	8.76174	8.454	8.896	7.82933	7.5897	7.79745	8.17068	8.12132	5.95359
Eef2k	NM_007908	2	6.34843	6.2867	6.15609	8.56911	8.50877	8.44676	8.64814	8.50443	8.93338	7.52275	7.82428	8.39647	8.4739	8.30676	8.27942	8.56315	8.8795	7.55644	8.01805	7.58981	6.97657	7.28287	7.63174	7.76369	6.33251	7.59112	7.64959	7.49282	7.79483	7.81921	8.26234	8.12132	7.98614
Efna1	NM_010107	2	5.64386	5.64386	5.64386	8.51359	8.90649	8.80261	9.08485	8.75155	8.67705	7.96167	7.37271	8.82675	9.27212	8.14081	8.18	6.66998	7.83006	9.09716	8.652	7.74176	7.87586	8.19959	7.39221	7.71856	7.94911	8.00402	8.25169	7.24818	6.8537	7.70694	8.18949	7.52146	6.92887
Efna4	NM_007910	2	5.64386	5.64386	5.64386	7.26641	6.77204	6.68469	7.42262	7.14299	6.93739	7.10001	6.77733	6.87798	7.80225	6.47099	6.41236	6.24629	7.05581	6.27888	6.63086	6.15779	6.89887	6.50246	6.74561	7.64811	7.37118	6.78313	6.99998	6.46671	6.8537	6.55401	7.81876	7.49942	6.42494
Efnb1	NM_010110	2	6.6211	6.38688	6.70393	10.4078	9.98934	10.9014	10.4692	10.5006	10.26	9.95638	9.77673	9.83897	10.6484	10.0153	10.0718	9.316	10.2508	10.7232	10.1614	8.94311	8.72482	8.99678	9.33691	9.06403	8.11746	9.45937	9.2065	8.60766	8.02542	9.58928	10.3478	9.8874	8.44849
Efnb2	NM_010111	2	5.64386	5.64386	5.75154	7.45507	7.26455	7.4433	7.36468	7.51641	7.45312	6.99827	7.28527	7.46754	7.76402	6.5393	6.44698	6.40175	6.58225	7.55644	7.86792	7.00512	7.48192	6.9762	6.83352	7.06243	6.7057	7.64629	7.57287	6.58253	6.93603	6.38917	6.76279	6.72413	5.64386
Egr1	NM_007913	2	6.11632	6.23387	5.94544	11.7785	11.5803	11.8808	12.6174	11.6912	11.2415	11.7512	11.6413	12.8627	12.1711	13.1819	13.2866	13.5487	12.3005	12.8809	11.9564	10.9429	11.8108	11.8645	11.404	12.0175	10.7921	11.5545	12.0946	11.6812	12.5851	11.9448	12.4349	12.3071	11.797
Ehf	NM_007914	2	5.64386	5.72266	5.64386	10.732	10.3586	10.1235	10.3733	10.1492	10.3061	10.6276	10.8152	10.2042	10.5431	9.06608	8.70841	8.52982	9.92075	9.25782	10.4327	9.1744	8.94376	8.10333	8.28976	8.79728	8.52936	9.11279	8.91943	8.10975	8.59744	8.91546	8.95986	9.32339	8.91005
Ehhadh	NM_023737	2	5.89934	5.79738	5.80253	7.89605	7.85075	7.85163	7.83903	8.18032	8.23666	7.76917	7.71141	7.99156	8.25242	7.48403	7.66615	6.84278	7.75554	7.98159	7.82781	7.64225	7.83472	7.23175	6.60281	7.62384	7.07647	7.80018	7.33805	7.06913	6.76638	7.07192	8.01072	7.66701	6.92887
Eif3e	NM_008388	2	7.47859	8.25473	7.39397	9.25931	9.77175	9.09857	8.75349	8.52502	9.71427	9.72116	9.54933	9.5366	8.10725	8.95794	9.08884	9.24589	9.38494	8.86023	9.12441	9.46388	9.15067	9.03456	8.35062	9.06403	8.52936	9.26155	9.31648	9.09103	9.1737	9.39282	8.91537	9.76801	9.34137
Elf3	NM_007921	2	5.7121	5.64386	5.75154	11.4703	11.1029	12.3457	11.7805	11.5959	11.1839	10.8796	10.5064	11.7057	12.0218	11.2483	11.6018	10.0566	11.115	12.298	11.5774	9.61587	9.36809	9.31803	10.33	10.8139	9.38493	10.2244	9.80152	9.4555	9.11011	9.89108	11.4454	10.775	8.94552
Elovl6	NM_130450	2	7.12521	7.92886	7.47476	8.66141	8.28024	7.90155	8.14466	8.81979	8.20839	8.68373	8.29626	8.11684	8.3503	7.82232	7.65138	7.62091	7.88353	8.26703	9.37226	8.15667	8.39765	7.71387	7.7035	7.38479	6.55741	8.68233	8.05417	7.83868	7.28917	8.19713	9.22886	8.96966	7.40715
Elovl7	NM_029001	2	5.7121	6.06268	6.07549	9.57287	9.34174	9.12508	9.0938	9.13979	9.52556	9.23159	9.19481	9.01788	9.05705	8.38309	8.72966	7.79933	9.18651	7.55644	9.58772	8.35826	7.79238	7.47098	7.74942	8.2011	7.00193	8.79649	8.46839	8.0466	7.55539	8.63777	9.16853	8.83532	7.0641
Emp2	NM_007929	2	5.64386	5.64386	5.64386	8.32487	7.88734	7.78668	8.17868	8.31646	8.34967	7.49811	8.6513	8.24	8.58043	7.61639	8.06209	6.66998	8.30529	7.48402	7.57671	6.64279	7.12045	6.9762	6.79024	7.32583	6.96315	7.59112	7.11268	7.24818	6.5741	6.91905	7.21223	6.79823	6.77963
Epb41l3	NM_013813	2	5.64386	5.79738	5.69872	7.71098	7.29209	7.283	7.63358	7.5964	8.03255	7.70603	7.23948	7.42663	7.47935	6.99339	7.16099	6.47362	7.43581	7.05469	7.75838	7.47883	7.25126	7.15149	7.23967	7.76369	7.34126	7.80018	7.2422	7.53944	8.23507	7.68341	8.01072	7.88672	7.0641
Epb41l4b	NM_019427	2	5.64386	5.64386	5.64386	9.7364	9.86643	10.1314	9.85794	10.0065	10.2967	9.45925	9.53756	9.47441	9.91394	9.34899	9.45061	8.59573	9.71001	9.46013	9.82693	8.66752	8.29524	8.21284	8.36544	8.73065	8.48898	8.93587	8.52039	8.37044	7.70377	8.64997	9.7685	9.37878	8.0527
Epcam	NM_008532	2	5.7121	5.64386	5.64386	12.751	12.5748	13.0552	12.6907	12.9245	12.7042	12.1857	12.2777	12.1855	12.9129	11.4679	11.6143	10.5887	11.8978	12.6208	12.564	11.0439	10.9084	10.4087	11.3397	11.5074	10.8195	11.5796	10.9582	10.7201	10.098	11.7757	12.3673	11.6087	9.58575
Epha2	NM_010139	2	6.39067	5.86842	5.69872	7.42529	6.51576	7.22536	7.45073	7.24579	6.90957	6.77034	6.8704	6.83693	7.68436	7.33826	7.00705	6.89607	6.78318	10.408	7.29228	6.83531	6.93825	7.00694	7.33311	6.78445	7.71247	7.01042	7.05743	6.82759	6.43002	6.70192	7.94585	7.28421	6.42494
Ephb2	NM_001290753	2	5.64386	5.64386	5.64386	8.29225	8.00855	8.38667	7.96135	8.18032	7.91853	7.80978	8.13681	7.97274	8.60947	7.67829	8.20044	6.84278	8.39394	7.40777	7.93238	7.58981	7.05031	6.84627	8.07211	7.69546	7.03969	7.41169	7.82525	6.6478	6.73606	7.73011	8.6151	8.24571	6.61316
Ephb4	NM_001159571	2	5.64386	5.64386	5.69872	7.66074	7.08718	7.87681	7.33481	7.40975	7.14252	7.31275	7.50437	7.64444	8.00166	7.21839	7.54351	6.32612	7.38728	8.13135	7.12585	7.00512	6.93825	7.51441	8.05392	7.62384	7.75848	7.80018	7.96691	7.24818	6.73606	7.36613	8.36515	7.76265	6.42494
Ephx1	NM_010145	2	5.95673	5.72266	5.94544	7.63496	7.85075	7.78668	7.7513	8.20605	7.59087	7.31275	7.92896	8.64255	8.23389	8.47314	8.60488	8.00736	8.51181	6.27888	7.12585	7.87922	7.34214	8.39814	7.607	7.59915	7.5649	8.20114	8.82334	8.55759	7.33034	8.68595	8.14201	8.10681	7.30162
Ephx2	NM_001271402	2	5.64386	5.64386	5.64386	7.6087	7.39732	7.35645	7.68183	7.72652	7.2125	7.52275	7.99245	7.3987	7.78962	6.83937	6.69762	6.32612	7.36239	6.95104	7.70033	7.15704	7.896	6.9127	6.79024	7.44143	6.33251	7.20672	6.70873	6.9361	6.64108	6.38917	6.92864	6.72413	6.20842
Eppk1	NM_144848	2	5.64386	5.64386	5.64386	8.06006	7.77467	8.41273	8.48096	7.57682	7.5464	7.92517	7.28527	8.41052	8.2616	7.84947	7.80611	6.60745	7.48276	7.75415	7.63985	6.92271	6.58831	7.03703	6.74561	7.8707	6.13734	7.01042	7.21721	6.91857	6.35219	6.87816	7.94585	7.25819	5.95359
Eps8l2	NM_133191	2	5.64386	5.64386	5.64386	10.2929	10.222	10.4046	10.7466	10.8188	10.7166	10.0053	10.0695	9.9025	10.5692	9.60148	8.99835	8.57953	9.60251	11.3149	10.6591	8.56257	8.80155	8.49888	8.30522	8.57478	7.73565	9.29646	8.43627	8.37687	8.0379	8.12906	9.88266	9.27231	7.30162
Eps8l3	NM_133867	2	5.64386	5.64386	5.64386	11.4258	11.1355	11.3622	11.1961	11.4622	11.7534	10.8287	10.7956	10.8268	11.2235	10.1901	10.4266	9.37349	10.6965	11.046	11.5167	10.0341	9.83769	8.84345	9.52689	9.85085	8.81715	9.93419	9.35135	9.22896	8.4085	8.93552	10.2324	9.7068	8.29195
Erbb2	NM_001003817	2	5.64386	5.64386	5.64386	8.44104	8.25245	8.77609	8.14466	8.94729	8.90196	7.78962	7.83971	8.17562	8.69326	8.05008	8.14879	6.99708	8.07954	9.34218	8.25829	7.53538	7.0858	6.77664	7.65605	7.93129	7.11236	7.47401	7.33805	7.06913	6.53941	7.14268	8.43773	7.7992	6.20842
Ergic1	NM_026170	2	7.12521	7.06835	7.07952	9.15431	8.73642	8.65031	8.76473	9.02884	8.31827	8.81919	8.47483	8.4175	8.97573	8.86784	8.88295	8.64325	9.28914	8.26703	8.43777	9.31027	9.06433	8.50965	8.64599	8.64881	8.00744	8.75943	8.91166	8.93852	8.78683	9.42866	9.64111	9.35443	9.25918
Errfi1	NM_133753	2	5.7121	6.33766	5.94544	9.26353	8.3863	7.90155	9.26193	8.83636	9.05583	8.35374	7.89982	8.79496	8.48961	8.54134	8.16967	8.42495	8.26556	8.91635	9.39988	7.78904	7.77073	7.61758	6.83352	7.74131	6.88234	7.87138	7.16589	7.36925	6.98841	7.36613	7.83079	7.6269	7.18774
Espn	NM_019585	2	5.83958	5.79738	5.80253	8.52065	9.36138	9.50611	8.46726	9.18576	8.58331	8.50978	8.76878	8.72359	9.03581	8.5579	7.9817	7.26354	8.16839	11.2725	8.99155	7.08309	7.34214	6.9762	6.87555	7.41339	7.42924	7.77565	7.72245	7.39482	7.50233	7.75291	8.36515	7.6269	7.76574
Esrp1	NM_001290383	2	5.64386	5.64386	5.64386	10.3653	9.94229	10.07	10.0677	10.3843	10.9124	10.2425	9.87919	9.79947	10.3175	8.9949	9.48016	8.03137	9.54836	9.55156	10.3264	8.87899	8.58297	7.82153	8.75131	8.69614	8.36061	8.82067	8.16287	8.01396	7.42841	8.24616	9.4516	9.12891	7.50549
Etl4	NM_001081006	2	5.77724	5.72266	5.80253	8.26729	8.3863	8.09637	8.05592	8.45164	8.69753	8.03201	7.49466	7.93435	8.07637	7.25947	7.89658	7.09148	7.52824	6.71832	8.47287	8.04422	7.8137	7.20549	7.06907	7.49594	7.27948	7.61897	7.53292	7.44466	6.73606	7.1768	7.9678	8.01657	6.20842
Ets2	NM_011809	2	6.88031	7.0067	6.19478	10.1992	9.86184	10.2373	10.298	10.0065	10.3167	10.3007	9.8623	10.0286	10.1172	10.599	10.2491	10.9642	10.1232	10.2855	10.496	9.66739	9.64292	9.82441	9.95206	9.70808	9.25454	9.75753	9.95678	9.63525	10.1216	9.76217	10.0177	10.0517	9.51668
Exph5	NM_176846	2	5.64386	5.64386	5.64386	7.59539	8.19523	7.37425	7.36468	7.70864	7.91853	7.80978	7.82428	7.8949	7.78962	6.6045	6.86062	6.54209	7.08654	6.95104	7.54408	6.42058	6.43159	6.58625	6.9561	6.43981	6.65794	7.05187	6.47572	6.66893	6.46741	7.03519	6.88317	7.09137	6.42494
F11r	NM_172647	2	5.95673	5.64386	5.75154	9.82174	9.82459	9.85871	9.96418	10.0604	9.93904	9.50325	9.78472	9.46434	9.73441	10.1138	10.2491	9.49935	10.0781	9.60376	9.78565	9.26081	8.96297	9.24256	8.88076	9.07302	7.66493	9.22577	9.05254	8.5405	9.06203	9.5956	9.80553	9.30445	9.04698
F2rl1	NM_007974	2	5.64386	5.64386	5.64386	9.15884	8.65387	8.90408	9.19701	9.34476	9.27335	8.81919	8.82023	8.8215	9.19757	8.24675	8.25031	7.55617	8.40616	9.34218	9.47105	7.58981	7.55972	7.12372	7.5036	7.32583	6.60854	7.75069	7.70457	7.30324	6.53941	7.1768	8.12257	7.93679	6.77963
F3	NM_010171	2	5.64386	5.64386	5.69872	7.98039	7.86916	7.83887	8.53449	7.51641	7.96657	7.78962	8.07297	8.01014	8.2616	7.58442	7.75174	6.60745	7.38728	7.15138	8.26831	6.74225	6.58831	6.9762	6.55189	7.46895	5.9116	7.09218	7.47084	7.21985	6.70509	7.24271	7.5251	6.86871	6.92887
Fahd1	NM_023480	2	6.34843	6.76748	6.67687	9.01631	8.77598	8.78277	8.76473	8.96247	8.85168	9.03152	8.62483	8.45188	8.94757	9.08905	8.86386	7.68287	8.73184	8.86023	8.51558	8.15667	7.60935	7.25754	7.53016	7.76369	7.24757	8.21945	8.0959	7.70194	6.88166	7.86178	9.18268	8.40834	6.92887
Fam102a	NM_153560	2	6.47164	6.2867	6.30495	8.71778	8.33424	8.94632	8.81967	8.99234	8.70968	8.54628	8.48957	8.24785	8.81046	8.11866	8.26979	7.74227	8.48899	8.46814	8.89133	8.15667	7.48192	7.65687	7.58184	7.02586	6.20537	8.00402	7.72245	7.43236	6.96246	7.75291	8.49175	8.01657	8.49711
Fam109a	NM_175474	2	6.96664	6.61057	6.78221	8.33292	8.33424	8.88559	8.68412	8.67992	8.67705	8.17875	8.16769	8.43135	8.87766	8.5579	8.62769	8.00736	8.8795	9.30061	8.13223	7.53538	7.28219	7.71387	7.72664	8.1846	7.48504	8.025	7.95184	7.81045	6.64108	7.5069	8.81602	8.5862	7.30162
Fam135a	NM_026604	2	5.64386	5.79738	5.75154	7.72327	7.69435	7.10266	7.45073	7.45336	7.82483	7.44754	7.83202	7.45403	7.5855	6.5393	7.09701	6.60745	7.65664	7.05469	7.85468	7.08309	7.25126	6.74052	6.20159	7.16692	6.44933	7.41169	7.11268	6.68973	6.9091	7.27457	7.21223	7.47703	7.0641
Fam174b	NM_001162532	2	5.64386	5.64386	5.64386	9.22947	8.62166	8.72154	9.02064	9.11962	8.75337	8.80921	8.9609	8.87316	9.29911	8.18412	8.72261	7.41726	9.2146	7.15138	8.67478	8.29414	7.97385	8.13149	8.09006	7.8707	8.48898	8.25538	8.59019	8.01396	7.13504	7.70694	8.68964	8.31045	6.92887
Fam189a2	NM_001114174	2	5.7121	5.64386	5.75154	7.66074	8.22413	7.826	8.2604	8.25617	7.93242	8.17875	8.19194	7.78052	7.97958	7.25947	7.13998	6.99708	7.11662	8.91635	7.98196	7.29448	7.01391	7.47098	7.8371	6.82759	5.99084	7.34655	6.94014	7.08494	8.11061	7.81921	7.59729	7.09137	7.18774
Fam195a	NM_026633	2	7.04809	6.80418	7.23605	9.8246	9.64393	10.2103	9.95439	9.83157	9.17746	9.54594	10.0128	9.64459	10.1693	9.57732	9.53753	8.68926	9.97923	9.81038	9.2049	8.35826	7.85544	8.08904	8.20988	8.79728	8.11746	8.30766	8.98752	7.82933	8.05028	8.64997	9.25587	9.0703	8.39818
Fam83e	NM_001033170	2	5.64386	5.64386	5.64386	11.1626	10.9854	11.1617	11.1062	11.1001	11.0179	10.7861	10.8499	10.6019	10.9784	10.1193	10.519	9.41971	10.6789	11.3459	11.0962	9.37369	8.80155	8.44378	9.08262	9.02749	7.96882	9.37206	8.91943	8.61312	8.08678	8.60055	9.6547	9.19212	7.6841
Fam83g	NM_178618	2	5.64386	5.64386	5.64386	7.74754	7.65244	8.08561	7.86014	7.72652	7.44345	7.54697	7.37271	7.60831	7.86381	7.25947	7.30008	6.60745	7.20328	8.74099	7.60862	6.83531	6.25575	6.26883	7.44898	6.98832	7.37118	6.78313	6.67241	6.80868	6.31165	6.60502	7.81876	7.35957	6.42494
Fam83h	NM_001168253	2	5.64386	5.64386	5.69872	8.81284	9.13667	9.26993	9.23792	8.94729	9.09957	8.4974	8.48957	8.92792	8.77244	8.07331	8.35431	7.93282	8.83496	8.94361	8.48151	7.00512	6.63699	6.9762	7.5036	7.41339	7.07647	7.56272	7.16589	6.77012	6.50386	7.47982	8.49931	8.13568	6.42494
Farp1	NM_134082	2	5.7121	5.64386	5.64386	7.87417	7.755	7.92589	7.81759	7.9099	8.06444	7.70603	7.89244	7.8949	7.97958	7.73764	7.55943	6.60745	7.90092	7.15138	7.82781	7.29448	7.0858	7.33224	7.65605	7.46895	7.03969	7.56272	7.2422	7.53944	6.26993	7.47982	7.9678	7.58564	7.0641
Farp2	NM_145519	2	5.7121	6.00079	5.75154	7.67346	7.20781	7.88924	7.50538	7.53682	7.80231	7.52275	7.29649	7.29647	7.41501	7.92801	7.93368	7.26354	8.30529	7.32727	7.77254	7.74176	7.39968	6.9448	7.42088	6.82759	6.60854	7.56272	6.94014	7.16143	6.5741	7.88261	8.26234	7.98518	8.39818
Fat1	NM_001081286	2	5.64386	5.64386	5.64386	9.07022	8.56632	9.31208	8.76473	8.86086	9.16868	8.72678	8.71123	8.64255	9.09861	8.45557	8.67228	7.90709	8.62078	8.30955	8.69722	8.08269	7.53425	7.7687	7.44898	7.93129	7.24757	8.46938	8.25169	7.89354	7.20312	7.86178	8.54382	8.24571	7.0641
Fblim1	NM_133754	2	5.7121	5.64386	5.75154	10.3886	10.3715	10.8144	10.2667	10.2578	10.1529	10.0652	10.1812	10.0756	10.7594	10.3171	10.2902	9.69246	10.2337	9.70281	10.0202	9.62892	9.2557	9.34233	9.83978	9.49713	8.99104	10.183	9.98667	9.69309	9.26678	10.1789	10.3096	10.0517	8.94552
Fbp2	NM_007994	2	5.64386	5.72266	5.64386	11.2298	11.1469	10.8875	10.9936	11.088	11.3612	11.1003	11.067	11.0099	11.1113	9.75299	9.98025	9.12834	10.3742	10.4842	11.0934	10.0633	9.76838	9.41861	9.52028	10.4906	9.44948	10.3626	10.4824	9.8722	9.1737	9.35607	10.7394	10.3668	8.7183
Fcgbp	NM_001122603	2	5.64386	5.72266	5.64386	11.788	12.3367	11.9507	11.9378	11.8848	11.0461	11.8796	10.0397	11.4602	12.0432	11.0693	12.0805	10.021	11.667	11.5592	11.9863	9.91129	10.0989	9.66011	10.0834	10.851	10.2109	10.7628	11.001	9.93674	9.41768	9.55726	10.8094	10.3046	9.44414
Fdx1	NM_007996	2	7.51724	7.80757	7.58077	9.60643	9.19621	9.72297	9.50256	9.72884	9.623	9.25384	9.51851	9.37399	9.64606	9.53613	9.5335	8.56315	9.5205	8.97036	9.3346	8.5351	7.896	8.06002	8.78478	8.29632	8.91181	8.65569	8.90385	8.29773	7.92148	8.90532	9.21974	8.97766	8.83638
Fermt1	NM_198029	2	5.64386	5.64386	5.64386	10.8205	9.90709	10.8306	10.5232	10.9559	10.9504	10.636	10.1736	10.2519	10.7233	9.20923	9.6157	8.2518	10.0933	10.1281	10.3989	9.26081	8.80155	7.9536	9.18644	9.51703	9.53788	8.97949	8.88811	7.955	7.75002	8.58792	9.54946	9.19897	6.92887
Ffar2	NM_146187	2	5.77724	5.79738	5.64386	7.79488	7.34567	7.70468	7.42262	7.82942	7.31148	7.64	8.35111	7.50731	8.11739	7.08764	6.95987	6.72991	7.48276	6.71832	7.08105	7.22739	7.05031	7.33224	8.53236	6.94979	5.64386	7.34655	7.36105	6.41765	7.50233	7.39541	7.49518	7.49942	7.76574
Fgfbp1	NM_008009	2	5.64386	5.64386	5.64386	9.78996	8.4851	9.78081	9.73184	9.98805	9.44063	9.2241	9.37766	9.02703	10.1045	8.66878	9.27863	8.31186	9.16508	8.94361	9.27618	8.19228	7.34214	7.12372	8.14264	8.57478	7.68889	8.40685	8.22687	7.73235	7.38998	8.09378	9.5854	8.73512	7.18774
Fgfr3	NM_001163217	2	5.7121	5.64386	5.64386	7.89605	8.02506	7.99651	7.7513	7.77889	7.38404	7.13239	7.75274	8.13388	7.94581	7.51828	7.80611	6.54209	7.81179	6.58616	7.12585	6.64279	6.31678	6.54496	6.4443	6.82759	6.60854	6.87838	7.31468	6.6478	6.70509	6.70192	7.2305	6.76166	6.42494
Fhl1	NM_001077361	2	5.64386	5.64386	5.64386	9.54198	9.56143	9.63346	10.0902	9.60377	10.2392	9.34646	9.57029	9.03159	9.33868	9.56098	9.2544	8.38823	9.28252	8.22321	8.89133	8.71727	8.39765	8.50965	8.20988	8.09915	7.68889	9.2348	9.29872	8.94285	7.28917	9.25589	8.94334	7.9531	8.83638
Fhl2	NM_010212	2	5.64386	5.64386	5.69872	8.15384	7.4715	7.24483	8.07411	7.86215	7.72461	7.99726	8.16157	7.81263	8.50515	8.07331	8.35431	7.09148	7.98486	8.46814	7.99409	7.58981	7.91586	8.19959	7.81568	8.35647	7.53877	8.34148	8.63804	7.94638	7.28917	8.12906	8.86947	7.9036	7.50549
Fkbp11	NM_024169	2	5.7121	5.86842	5.64386	8.10771	7.5648	7.61773	7.47832	8.25617	7.00468	8.47232	8.26232	7.7913	8.85359	7.82232	7.9817	6.84278	8.00108	6.71832	7.40562	7.87922	8.08328	7.57719	8.49241	7.52245	7.78095	8.00402	8.13645	8.14031	7.3099	8.12906	8.62894	8.17794	8.79808
Fkbp9	NM_012056	2	6.0119	5.72266	5.89937	8.2247	7.85075	8.17967	8.21193	8.04432	8.1322	7.49811	7.6339	7.802	8.2616	8.24675	8.58946	7.5889	8.23846	6.71832	8.17548	7.41995	7.42762	7.33224	6.99475	6.6467	7.00193	7.31284	7.21721	7.14645	6.31165	7.47982	7.66603	7.17719	7.50549
Flnb	NM_001081427	2	6.81973	6.65142	6.56322	10.8347	10.5954	10.7597	10.9125	10.4796	10.8117	10.7448	10.5668	10.3572	10.4698	10.0331	10.2637	9.75148	10.2508	11.0586	10.7936	10.0044	9.7127	9.36623	9.98122	9.56881	8.0635	9.96164	9.46186	9.15605	9.52354	9.27176	10.0018	9.63279	9.14176
Flrt3	NM_001172160	2	5.64386	5.64386	5.64386	7.94933	7.97495	7.70468	7.88096	7.77889	7.44345	7.34073	7.61609	7.11955	8.27072	6.83937	7.07504	6.84278	7.08654	8.13135	8.50714	7.00512	7.12045	6.66545	6.74561	7.52245	6.20537	7.24296	6.63516	6.62637	5.93829	6.79274	7.13672	6.93591	5.64386
Fmn1	NM_001285459	2	5.95673	5.72266	5.69872	7.44025	7.34567	7.46005	7.24132	7.5964	7.91154	7.5708	7.09269	7.17	7.14435	7.08764	6.98365	7.34245	7.17497	6.71832	8.17548	7.22739	6.81675	6.50246	6.9561	7.13293	5.99084	7.16953	6.74415	6.84626	7.5897	7.07192	7.13672	7.6269	6.61316
Fnbp1l	NM_153118	2	5.89934	6.06268	5.75154	7.97011	7.71485	7.69055	7.50538	7.94087	8.16198	7.78962	8.02655	7.84403	7.99066	7.25947	7.28101	7.68287	7.61509	7.87235	7.96972	7.29448	7.74875	7.51441	7.03239	7.57403	7.27948	7.27833	7.47084	7.55085	6.70509	7.36613	7.73164	7.43119	6.42494
Fndc5	NM_027402	2	5.64386	5.64386	5.64386	7.72327	7.02286	7.69055	7.33481	8.11392	6.64857	7.68435	7.10552	6.89806	7.68436	7.48403	7.28101	6.24629	7.79328	7.40777	6.86026	6.42058	6.25575	6.54496	6.83352	6.38308	5.73874	7.37948	6.63516	5.91531	7.57265	8.14638	7.15597	6.52028	7.76574
Foxa3	NM_008260	2	5.64386	5.64386	5.64386	8.06006	7.99184	7.91378	7.88096	7.92547	7.34303	7.88772	7.48489	8.01933	8.48178	7.55172	7.99347	6.89607	7.77454	7.69121	7.40562	6.42058	6.63699	6.26883	7.13975	6.91019	6.60854	6.83155	7.02899	6.51415	6.5741	6.74805	8.01072	7.25819	5.95359
Foxq1	NM_008239	2	5.83958	5.79738	5.89937	7.89605	7.05538	8.09637	7.47832	8.02999	8.05811	7.10001	6.98583	7.64444	7.64281	6.99339	7.46121	6.54209	7.43581	7.242	7.23209	6.92271	6.72966	6.6264	5.98832	7.32583	6.96315	7.05187	7.29092	7.21985	5.70775	7.10773	6.88317	6.6053	5.95359
Frk	NM_001159544	2	5.64386	5.64386	5.64386	8.87475	8.3605	8.26797	8.16178	8.59484	8.56113	8.59357	8.76474	8.00087	7.92286	6.72671	6.66857	6.66998	7.50568	7.75415	9.09091	8.04422	7.91586	6.77664	7.03239	7.38479	6.44933	8.08613	7.90566	7.36925	7.03896	7.03519	7.67939	7.83485	6.61316
Fxyd3	NM_008557	2	5.64386	5.64386	5.64386	9.74547	9.34174	9.28412	9.21351	9.72884	9.52556	9.56978	10.0514	9.92959	9.92553	8.57428	9.34898	7.45326	9.34738	8.03326	9.03916	7.08309	7.34214	7.00694	7.79393	7.93129	8.51603	7.69943	8.25169	7.43236	7.89428	7.39541	8.74153	8.21898	6.92887
Fzd5	NM_022721	2	6.26001	6.06268	6.23243	8.693	8.20976	8.51251	8.97296	8.81979	8.79578	8.39436	8.32394	8.53761	8.94757	7.61639	8.20044	7.71287	8.16839	8.61101	8.74825	8.29414	8.24901	7.96929	7.95938	8.26527	7.75848	8.43845	7.77476	7.68129	7.3505	8.21366	9.28239	8.82649	7.40715
Galm	NM_176963	2	6.65617	6.52521	7.10004	8.86369	8.73642	8.89178	8.98263	8.78607	8.97088	8.75824	8.74849	8.75697	9.40645	8.5579	8.77806	8.12362	9.04507	7.6254	8.71931	8.22704	8.31032	8.03041	7.79393	8.26527	7.82486	8.51456	8.55072	8.03851	7.98732	8.11153	8.74153	8.48887	8.11634
Galnt12	NM_172693	2	6.26001	6.17903	6.11636	8.80708	8.10491	8.67205	8.50797	9.06444	8.59646	9.08213	8.47976	8.27114	9.06231	8.09616	8.53417	7.30353	8.39394	8.80184	8.93603	8.00471	7.45502	7.17874	7.607	7.82885	7.5649	7.89435	7.31468	7.19093	7.26813	8.05761	8.58701	8.19175	8.0527
Galnt3	NM_015736	2	5.95673	6.33766	6.15609	8.30865	7.49539	7.60272	7.77374	8.07257	7.75619	8.17875	8.04663	7.52034	7.95716	6.89256	7.40947	6.78745	7.75554	7.242	8.12121	7.69287	7.01391	6.87987	6.69957	6.86949	6.60854	7.59112	6.99998	6.77012	7.13504	7.07192	7.53983	7.64709	6.77963
Galnt6	NM_001161767	2	6.75652	6.9423	7.10004	9.20777	9.42498	9.34403	9.01123	9.28566	9.55952	9.13901	9.2008	9.11976	9.58156	8.77174	9.29773	8.74841	9.42756	8.94361	9.16253	8.98433	8.69064	8.58288	9.38134	9.15999	8.52936	9.3221	9.40213	8.87632	8.55465	9.20719	9.98845	9.5601	8.7183
Gas6	NM_019521	2	5.64386	5.64386	5.69872	11.3256	11.0892	11.8824	11.5961	11.5502	11.898	10.8772	10.7174	11.5707	11.7027	12.0466	11.959	11.7788	12.2291	11.7017	11.0934	9.65468	9.55066	9.71698	10.7098	9.9518	9.13753	9.91747	9.96806	10.2713	9.25079	10.0468	10.5846	10.2094	9.83305
Gata6	NM_010258	2	5.64386	5.64386	5.64386	8.77202	8.32093	8.81569	8.71922	8.50443	8.57448	8.52205	8.13055	8.44507	8.91885	7.55172	7.8713	6.89607	8.10976	7.69121	8.49865	8.15667	7.60935	7.35631	7.8371	7.62384	7.61578	8.025	7.85796	7.35628	6.8537	7.33625	8.63582	8.24571	6.42494
Gcg	NM_008100	2	5.64386	5.64386	5.64386	7.92826	8.10491	8.07477	7.1064	8.38563	6.97814	8.67276	9.0955	9.26992	9.34733	9.45003	5.91519	6.07202	9.06063	6.44069	6.77845	6.15779	7.42762	6.26883	6.83352	5.73731	8.68042	7.41169	7.2422	6.01763	5.82762	5.64386	7.98942	8.23241	5.95359
Gcnt3	NM_028087	2	5.64386	5.64386	5.64386	8.62258	8.13565	8.38667	7.96135	8.19324	7.95301	8.47232	9.19481	8.0909	8.99236	7.17611	7.3189	6.40175	7.20328	9.14492	8.91704	7.69287	6.89887	6.26883	7.27149	7.54847	7.14737	7.56272	7.87403	6.71026	6.79608	6.74805	8.34013	7.9531	6.20842
Gdpd1	NM_025638	2	5.64386	5.64386	5.64386	9.85842	9.75205	10.2662	9.76581	9.99913	9.67556	9.4335	9.46481	9.81804	10.3065	9.38656	9.70425	8.80523	10.0236	9.04777	9.50536	8.94311	8.48	8.57264	8.99954	9.20976	8.76174	9.7762	9.92627	9.62448	9.03115	9.54425	10.8631	10.0928	8.23576
Ggact	NM_145466	2	5.7121	5.64386	5.64386	7.73545	7.23645	7.96163	6.99624	7.53682	8.10179	7.76917	7.74457	7.91476	7.12437	7.44894	7.79271	6.99708	8.10976	6.71832	7.36882	7.15704	7.28219	6.41349	6.74561	6.98832	6.88234	7.67311	7.53292	7.30324	6.43002	7.47982	8.27119	7.76265	7.18774
Gipc2	NM_016867	2	5.64386	5.64386	5.64386	10.9079	10.2398	10.6957	11.0055	11.1589	10.8661	10.6969	10.8641	10.4001	11.4917	10.346	10.6154	9.19364	10.4441	10.2961	10.8564	9.20959	9.10814	8.08904	9.03706	8.92195	8.43334	9.4823	9.05254	8.52899	7.93489	9.16532	10.2437	9.57071	8.54415
Gjb1	NM_001302497	2	5.64386	5.64386	5.69872	9.51042	8.79536	9.29816	8.89324	9.14644	9.17746	8.75824	8.95383	8.74593	9.29465	9.06608	9.50913	8.1011	9.98331	7.40777	8.88483	8.32656	7.77073	7.83871	8.0355	8.77541	7.68889	8.40685	8.896	8.14031	7.3099	8.72106	10.4291	9.79088	8.11634
Gjb3	NM_001160012	2	5.64386	5.64386	5.64386	9.62619	9.41875	9.39721	9.62484	9.64197	9.72229	9.2241	9.11781	9.22689	9.56683	8.4905	8.69407	8.03137	9.30228	8.26703	9.58772	8.08269	7.18733	7.25754	7.87903	8.38564	7.3107	7.87138	8.40341	7.45685	6.93603	7.55957	9.28676	8.27196	6.42494
Glod5	NM_027227	2	5.64386	5.64386	5.64386	9.38839	9.12905	8.57538	9.41963	9.14644	9.11792	9.21657	9.20676	9.26219	8.46599	8.00248	7.99347	7.55617	7.96846	8.5052	9.41801	7.83484	8.35465	8.35101	8.01685	8.21741	8.00744	9.28781	9.26863	8.83954	7.73476	8.3693	9.47861	8.92074	7.59756
Gm11545	NM_001105561	2	5.64386	5.64386	5.64386	8.23332	7.94054	8.03057	7.81759	8.01552	7.68413	7.96167	7.83202	7.72537	7.72473	6.89256	7.37392	6.47362	7.55045	7.32727	8.21748	7.47883	7.99267	7.73238	7.23967	8.35647	7.18155	8.23753	7.68648	7.58459	7.70377	7.63514	8.70932	7.9531	6.77963
Gm15421	NR_004442	2	7.5549	8.00964	7.15991	9.74245	9.89366	9.22651	9.1549	9.19222	9.94076	9.88215	9.93052	9.78875	8.40931	7.64767	8.10609	8.1011	8.23846	8.86023	9.61154	9.50694	9.3536	8.96583	8.36544	9.72529	8.59423	9.66037	9.2065	9.0594	9.6263	8.23001	8.5799	8.78153	7.91635
Gm3336	NM_001195253	2	5.64386	5.64386	5.64386	9.97092	10.1894	10.385	10.1342	10.2731	9.31636	9.28298	9.32382	9.8519	10.5431	9.69428	9.89189	8.62758	10.2372	9.60376	9.88671	7.96408	7.53425	7.20549	7.87903	7.95093	6.79671	8.51456	8.08212	7.71214	7.20312	8.24616	9.334	8.73512	6.42494
Gm9926	NR_040528	2	5.77724	5.64386	5.64386	7.66074	7.44719	6.94493	7.68183	7.79594	7.82483	7.16406	6.84004	7.41274	7.69794	6.99339	6.93568	6.54209	6.70614	8.67747	7.38734	7.64225	7.48192	6.9762	7.20712	7.74131	7.24757	8.00402	7.49183	7.60665	6.60798	6.74805	8.03171	7.64709	6.20842
Gmds	NM_146041	2	6.99431	7.03785	7.07952	11.4866	10.6549	10.758	10.8896	11.53	11.2359	11.2313	10.5399	10.4655	11.6434	10.1081	10.6437	9.35458	10.755	9.85413	11.2072	10.1564	9.82198	8.9501	10.6864	9.75911	9.43538	10.3377	9.71043	9.30175	8.95422	9.83876	11.2239	10.4294	8.94552
Gna11	NM_010301	2	8.68244	8.7634	8.63236	11.3954	10.8059	11.2244	11.6009	11.7547	11.7465	11.0838	10.8423	10.6171	11.6372	11.2761	10.9289	10.1251	11.2885	10.4177	11.1649	10.192	10.2395	9.85851	10.0516	10.0416	9.71168	10.8535	10.7343	10.2592	9.10419	10.8499	12.3497	11.4964	10.1237
Gnpnat1	NM_019425	2	6.16583	6.33766	6.11636	8.80708	8.3605	8.42132	8.12734	8.28059	9.11183	8.90603	8.60239	8.563	7.96841	7.61639	8.1276	7.34245	8.19682	8.5052	9.06239	8.15667	7.45502	7.20549	7.20712	7.02586	7.00193	7.82431	7.68648	6.90083	7.15809	7.27457	7.76963	7.66701	7.30162
Golt1a	NM_026680	2	5.64386	5.64386	5.64386	7.93883	7.5648	8.36014	7.6579	8.05852	7.97331	7.5708	8.27938	7.84403	8.31548	6.78414	7.07504	6.07202	6.99234	8.35086	7.74409	6.92271	7.45502	7.0954	7.77185	8.31159	7.61578	8.08613	8.0959	7.84797	7.01391	7.4241	8.27999	7.83485	6.77963
Gp1bb	NM_010327	2	5.83958	5.93612	5.80253	9.62292	9.7067	10.0645	9.92963	9.88829	10.2805	9.44643	9.6023	9.21493	9.99321	9.56917	9.30719	8.07823	9.44545	10.2201	9.97811	9.96376	9.65478	9.8711	10.4941	10.7111	9.91835	10.4032	10.7497	9.98385	8.8519	10.2567	12.0364	11.2196	9.46873
Gpa33	NM_021610	2	5.64386	5.64386	5.64386	12.2104	10.9491	11.9559	12.3329	12.167	11.965	11.397	10.9133	10.8796	12.1717	11.0635	11.3846	10.2429	11.6413	10.8583	12.0311	9.49273	9.27889	8.47709	9.70059	9.24201	7.45741	9.88916	9.25642	8.79701	8.30903	8.99411	11.1502	10.2529	8.11634
Gpt	NM_182805	2	6.39067	6.52521	6.50286	8.38025	8.19523	8.55212	8.1954	8.69816	8.27532	8.48492	8.88857	8.05556	8.44196	7.61639	7.3918	6.99708	7.98486	8.35086	7.91972	7.00512	7.37119	7.40328	6.55189	7.62384	7.34126	7.67311	7.74009	7.57344	7.26813	7.21014	8.30608	7.78104	7.0641
Gpx2	NM_030677	2	5.7121	5.64386	5.64386	12.0304	11.7893	11.8342	10.9376	12.0493	11.514	12.2275	11.5487	11.7485	12.2505	11.3253	12.1286	10.6168	12.3216	10.5566	11.4489	11.2897	10.4618	10.1092	11.5667	11.1284	11.3362	11.6936	10.9807	10.8815	10.3934	11.6941	12.7692	12.436	10.7333
Grb7	NM_010346	2	5.64386	5.64386	5.64386	8.18971	8.16575	8.20971	8.22827	8.76892	8.65627	8.01474	7.37271	7.94404	8.60227	8.45557	8.3634	7.68287	8.71227	7.05469	7.78656	7.83484	7.21965	6.9762	7.67997	8.08143	6.88234	7.44318	7.38368	6.73049	6.96246	7.70694	8.91537	8.71613	7.30162
Grtp1	NM_025768	2	5.64386	5.86842	5.80253	10.1793	9.99354	9.94457	10.2225	10.4423	10.5005	9.78366	9.45982	9.77251	10.3372	9.17743	9.30247	7.93282	9.6131	9.47889	9.98421	8.58953	8.0656	7.51441	8.27414	8.82947	8.28403	8.64219	8.71147	8.13273	7.85249	8.02051	9.32977	8.84409	6.77963
Gsdmc2	NM_177912	2	5.64386	5.64386	5.64386	10.7813	10.5731	10.9877	11.1689	11.4243	11.1224	12.0755	9.86983	10.803	11.1636	11.8113	12.0997	11.0012	11.7699	9.7499	11.1419	9.0045	8.38346	8.0746	8.1078	7.52245	6.7057	8.77189	7.96691	8.31123	6.93603	9.68722	10.301	9.94563	9.44414
Gsdmc4	NM_028992	2	5.64386	5.64386	5.64386	11.8277	11.6351	11.6692	12.042	12.2057	11.4442	12.4882	10.3333	11.6387	12.0007	12.5409	12.8914	11.8682	12.8105	9.82511	12.1925	9.54876	8.84363	8.7557	8.73998	8.13394	6.55741	9.25269	7.92122	8.94718	7.22512	10.6489	11.3525	10.9169	9.20167
Gstm2	NM_008183	2	5.7121	5.64386	5.64386	10.1131	9.50956	9.85237	9.69117	9.80657	9.46233	9.43998	9.64463	9.75058	10.3372	9.55275	10.1316	8.47834	10.281	8.39102	9.3346	7.87922	7.25126	7.55657	7.17383	7.20013	7.96882	7.72529	7.92122	7.35628	7.55539	8.49632	8.5365	8.12132	7.84301
Gstm5	NM_010360	2	5.7121	5.72266	5.64386	8.85813	8.555	8.34217	8.57338	9.13979	9.09031	8.65057	8.85481	9.21092	9.17346	8.71381	8.90803	7.93282	9.16508	7.6254	8.56521	7.22739	7.60935	7.12372	7.23967	8.02694	8.51603	7.59112	7.90566	7.60665	7.46584	7.79745	8.79776	8.36023	7.30162
Gstt1	NM_008185	2	5.64386	5.64386	5.64386	8.16288	8.0735	8.12817	7.83903	8.33989	7.27924	7.76917	8.29065	8.45188	8.60947	8.71381	8.65757	7.18007	8.58894	7.40777	7.68545	6.83531	7.45502	7.15149	7.03239	7.41339	6.96315	7.50419	7.19178	7.43236	6.82518	7.27457	7.55441	7.17719	6.61316
Gstt2	NM_010361	2	6.21368	6.06268	6.15609	9.48898	9.05861	9.17669	9.33918	9.82744	9.34	9.33259	9.22743	9.02703	9.68751	8.78587	9.06675	7.98294	9.31531	7.928	8.91066	8.5351	8.5324	8.3865	8.17665	8.61227	8.76174	8.69547	8.78983	8.48204	8.4085	8.4129	9.24243	8.79064	8.11634
Gstt3	NM_133994	2	6.47164	6.23387	6.33987	9.46357	9.11369	9.15627	9.23792	9.55456	9.49078	8.96115	8.92157	9.21493	9.87261	8.95794	9.46757	8.12362	9.55387	7.40777	8.95478	8.00471	7.74875	7.75065	7.36297	8.04534	7.82486	8.14478	8.1759	7.9202	7.15809	7.88261	9.02935	8.07736	7.50549
Gtf2ird1	NM_001081462	2	6.58516	6.56852	6.26915	9.05571	8.42415	9.20182	8.77589	8.76026	8.8184	8.58189	8.3403	8.31663	8.67963	8.2053	8.10609	7.45326	8.25207	7.75415	8.49865	8.12015	7.77073	7.67612	7.85822	8.13394	7.42924	7.98275	7.93661	7.40745	7.44725	7.45222	8.3734	8.13568	7.0641
Guca2a	NM_008190	2	5.64386	5.79738	5.80253	14.0123	13.5202	14.0626	14.316	14.6254	13.948	13.5149	14.8727	14.1251	14.706	12.2791	12.1058	11.0752	12.3361	15.2701	14.2898	11.0776	9.83247	9.87943	11.5408	11.4464	11.0772	11.6128	11.616	10.895	10.6137	10.6879	12.2591	11.85	10.5027
Hadh	NM_008212	2	8.96707	8.93869	9.18694	11.751	11.1915	11.8683	11.6226	11.8658	11.8411	11.5138	11.5202	11.3368	11.8192	10.8107	11.0909	9.84252	11.1805	11.4915	11.5632	10.4269	10.2974	9.98354	10.7723	10.8718	9.84561	10.8329	10.9526	10.1694	9.67106	10.0606	11.2521	10.6329	9.34137
Hbegf	NM_010415	2	5.7121	5.64386	5.64386	10.8998	10.394	10.4261	10.8104	10.0319	10.0144	9.77343	9.85283	11.4803	10.5488	9.92241	9.70067	9.01247	9.52612	11.9803	10.7279	7.96408	7.85544	8.79144	8.93145	9.59401	7.3107	9.25269	8.59019	8.42732	9.88652	7.79745	9.432	8.19175	7.0641
Hdac11	NM_144919	2	5.83958	5.72266	5.80253	8.01078	8.42415	8.23914	8.2604	8.3046	8.63094	7.97957	7.94331	8.27114	8.12747	7.2994	7.77918	6.94746	7.9181	6.44069	8.02988	7.00512	7.25126	7.23175	7.27149	7.67198	6.96315	7.01042	7.31468	7.64977	6.39163	6.74805	8.0829	7.76265	6.77963
Hdhd3	NM_024257	2	5.7121	5.64386	5.75154	7.52694	7.37172	7.94982	7.47832	8.15413	7.36368	7.31275	7.60711	7.42663	7.88773	7.48403	7.40947	6.89607	7.75554	7.15138	6.80623	7.47883	7.01391	6.84627	6.91639	6.98832	6.92332	7.69943	7.40597	7.21985	5.99059	6.79274	8.45337	7.92029	6.77963
Heph	NM_001159627	2	5.64386	5.64386	5.64386	8.78966	8.69573	8.05284	8.61124	8.77752	9.01724	8.86808	8.49445	8.0996	8.3503	7.44894	7.79271	6.94746	8.01711	7.48402	9.14087	8.26098	7.53425	6.58625	7.03239	7.20013	6.44933	7.96115	7.11268	7.06913	7.03896	6.87816	7.62518	7.35957	5.95359
Hes1	NM_008235	2	6.06506	5.79738	6.26915	10.2511	10.3812	10.4556	11.3589	10.8374	10.3687	11.2313	10.8337	11.1938	11.3655	11.7076	11.7906	12.1681	11.1912	10.8511	10.4216	10.2182	10.2512	10.6759	11.3823	11.1175	9.96816	10.8209	11.2399	10.7023	11.5507	11.229	10.9049	11.0173	10.7026
Hid1	NM_175454	2	5.64386	5.72266	5.69872	9.78704	9.38076	9.79739	9.75458	9.60377	9.38363	9.04858	9.35099	9.37757	9.91975	9.45888	9.82764	8.64325	10.569	7.242	8.83848	8.32656	8.24901	7.78652	7.77185	7.35561	7.61578	8.00402	8.16287	8.5174	7.13504	8.89511	8.99769	8.63757	9.73511
Hint2	NM_026871	2	8.40168	8.02527	8.08153	9.50331	9.93794	10.134	9.799	9.92361	9.91999	9.24646	10.0728	10.0756	9.9313	9.8966	10.0037	9.00035	10.1742	9.58657	9.07387	8.58953	8.5579	8.7557	8.70545	9.59401	9.69403	8.95784	9.19374	8.67706	9.03115	9.31069	9.69802	9.39081	8.54415
Hip1r	NM_145070	2	6.30489	5.86842	6.19478	9.03121	8.61076	8.70054	9.04851	9.16624	9.37348	8.93385	8.59787	8.66031	8.75305	7.9023	8.40802	7.62091	8.47745	8.80184	8.79754	8.71727	8.98194	8.57264	8.49241	8.38564	8.36061	8.75943	8.94249	8.55191	7.93489	8.72106	9.34662	8.93723	9.11086
Hist1h2bc	NM_023422	2	8.51107	8.8883	8.31887	11.2491	11.485	11.3667	11.3755	11.3685	10.8405	11.044	11.5446	11.2796	11.2652	10.9892	11.2599	10.3471	11.3657	10.9485	11.3414	10.1382	9.80078	9.99891	10.1534	10.3423	10.565	10.3123	10.7562	10.3437	10.4031	10.7229	10.8964	10.4294	10.0604
Hnf1a	NM_009327	2	5.64386	5.64386	5.64386	8.01078	7.5189	7.71868	8.01883	8.05852	8.20267	7.42157	7.60711	7.32642	7.77687	6.99339	7.11865	6.78745	7.48276	7.928	7.82781	7.15704	7.15428	6.45866	7.20712	6.98832	7.03969	7.01042	7.11268	6.44238	6.08984	7.47982	8.21724	7.78104	6.92887
Hnf4a	NM_008261	2	5.64386	5.64386	5.64386	11.2277	11.0473	11.4393	11.1128	11.2819	11.0691	10.9495	10.9096	10.7977	11.2606	10.5377	10.6474	9.53339	10.8273	10.8293	11.2137	10.2438	9.70701	9.31803	9.78019	10.1728	8.8705	10.1404	10.1274	9.65125	8.76447	9.81187	11.1442	10.7472	8.91005
Hnf4g	NM_013920	2	5.64386	5.64386	5.64386	8.20731	8.02506	7.91378	7.90148	7.77889	8.04538	8.19418	8.14304	8.05556	7.04154	6.72671	7.03007	6.47362	7.61509	7.242	7.89405	7.78904	8.43942	7.51441	6.9561	8.26527	7.4005	8.60088	8.25169	8.54622	7.44725	7.90313	8.94334	9.01698	7.50549
Homer2	NM_011983	2	5.64386	5.64386	5.64386	8.33292	7.5189	7.87681	8.29182	8.51476	7.91853	8.23947	8.86615	7.5587	8.60227	7.04129	7.09701	6.40175	7.38728	8.80184	8.70462	6.83531	7.21965	6.9448	7.06907	7.54847	6.88234	7.31284	7.2422	6.86467	6.22697	6.60502	7.56885	7.60642	5.95359
Hook2	NM_001167991	2	6.34843	6.23387	6.23243	9.23806	9.1889	9.38848	9.26193	9.07843	9.79061	9.17054	8.93599	9.07193	9.50634	9.17743	9.39405	8.88647	9.42756	8.83133	9.11888	8.04422	7.896	8.01537	8.25834	8.29632	7.4005	8.77189	8.58042	8.35749	7.75002	8.39851	9.62047	9.09256	8.34604
Hoxa5	NM_010453	2	5.7121	5.64386	5.64386	8.09831	7.73507	8.74907	8.12734	8.33989	7.89744	6.92622	7.74457	7.86459	8.53573	7.17611	7.72378	6.99708	7.90092	8.46814	8.15402	7.15704	7.72644	7.17874	7.33311	7.38479	6.60854	7.31284	7.38368	6.86467	6.13701	6.55401	6.54646	6.76166	6.20842
Hpd	NM_008277	2	5.64386	5.64386	5.64386	8.77793	8.79536	8.58305	8.59873	8.81144	8.44964	8.84872	9.02303	8.58795	8.8475	8.16263	8.40802	6.78745	8.36916	7.55644	8.09891	6.64279	5.98201	6.21719	7.06907	7.57403	7.5649	7.16953	7.40597	6.90083	7.62322	6.70192	8.35686	8.0624	7.50549
Hsd17b13	NM_001163486	2	5.64386	5.64386	5.64386	7.44025	7.02286	7.10266	7.14133	7.53682	7.65091	7.28422	7.83202	6.77311	7.39846	6.07045	5.81268	5.97629	5.94146	8.03326	8.02988	6.92271	6.72966	5.98993	6.20159	7.35561	6.50438	6.78313	6.63516	6.11316	6.04107	6.2678	6.76279	6.52028	5.95359
Hspa1a	NM_010479	2	6.93843	7.43886	6.11636	11.7807	11.5662	12.6477	12.4208	11.5043	10.7355	11.6303	10.6868	11.6638	12.5646	13.5489	13.6368	14.2266	12.8801	12.0697	12.3554	11.6641	11.4949	11.5348	12.0198	11.9738	9.89279	12.4369	12.0396	11.9619	11.6291	11.3885	11.5067	12.3447	11.5195
Hspa1b	NM_010478	2	6.81973	6.72982	6.30495	11.3337	10.9812	12.2465	12.1435	11.1589	10.2067	10.972	10.0497	10.8515	12.5069	13.012	13.1674	13.7691	12.2988	11.6364	11.9961	11.3101	11.1581	11.0095	11.5587	11.443	9.42115	12.0653	11.2691	11.208	10.996	10.9861	10.9415	11.5496	11.0011
Hyal2	NM_010489	2	6.34843	6.69116	6.7305	8.7838	7.97495	8.8351	8.12734	8.98493	8.68117	8.60515	8.17987	8.26342	8.89546	8.5579	8.5422	8.00736	8.789	8.46814	9.03329	8.29414	8.61976	8.28984	8.25834	8.02694	7.24757	8.77189	8.38108	8.42732	7.3505	8.05761	9.14465	8.47764	7.6841
Hyi	NM_026601	2	6.90967	6.8749	6.83213	8.34887	8.61076	8.07477	8.58611	8.96247	9.2624	8.06593	8.96442	8.95694	8.45803	8.95794	8.58946	8.29211	8.54537	8.99663	8.22779	8.19228	7.53425	7.57719	7.8371	8.97088	8.98137	8.23753	8.93484	8.03037	7.85249	8.07581	8.38976	8.17794	8.11634
Ica1	NM_010492	2	5.83958	5.93612	5.75154	8.32487	8.13565	8.50445	8.30729	8.67992	8.68937	7.90657	7.97159	8.45866	8.78523	8.14081	8.41678	6.60745	8.58894	6.71832	7.52748	7.41995	7.37119	6.9762	7.06907	6.69409	7.84632	7.34655	7.42792	7.31669	6.60798	7.79745	8.03171	7.49942	7.91635
Ick	NM_019987	2	6.26001	6.52521	6.33987	8.82999	8.84271	8.86057	8.88296	8.96999	8.81466	8.52205	8.10524	8.60638	8.67276	8.32622	8.42549	7.52268	8.68241	8.17801	8.94855	7.69287	7.48192	7.0954	7.95938	7.52245	7.45741	7.93923	7.38368	7.58459	6.79608	7.73011	8.42984	7.92029	6.77963
Id3	NM_008321	2	6.88031	6.61057	6.07549	10.6361	10.0349	10.715	10.9912	10.8104	10.1851	10.2425	10.1797	10.5709	11.2833	11.5571	11.2804	11.2568	10.7693	10.5118	10.2875	10.4855	10.7066	10.9335	10.5406	10.6281	9.76337	11.1469	11.4286	10.5905	9.29305	11.0334	11.3251	10.864	9.75523
Ifi27l2b	NM_145449	2	5.77724	5.64386	5.80253	11.3536	11.1183	11.2666	10.9598	11.3148	11.1018	10.7962	10.8298	10.7251	11.2652	11.0343	11.0379	9.78011	11.0463	11.0207	11.4944	10.0536	10.175	9.76721	9.73524	10.1686	9.11117	10.3038	9.58418	9.74124	8.7942	8.83227	9.84165	10.0172	8.29195
Ift43	NM_001199843	2	5.7121	5.72266	5.69872	8.76014	8.94171	8.77609	8.61124	8.78607	8.84802	8.22453	8.14304	8.64255	8.67276	8.26703	8.59719	7.48839	8.46581	7.05469	8.62884	7.29448	7.53425	7.06651	7.79393	7.80745	7.4005	7.91696	7.74009	7.8572	7.26813	8.18041	8.55837	7.83485	7.30162
Igf2bp2	NM_183029	2	5.77724	5.64386	5.64386	7.94933	7.17859	7.78668	7.79583	8.08649	7.65929	8.14741	8.15542	7.34117	8.31548	7.2994	7.07504	6.40175	6.92593	8.17801	7.98196	6.92271	7.0858	6.50246	6.83352	7.80745	7.03969	7.24296	7.31468	6.78953	6.73606	6.83609	7.70576	7.74402	6.61316
Igf2r	NM_010515	2	5.7121	5.64386	5.64386	8.16288	7.44719	8.13862	7.63358	8.28059	7.87604	7.90657	7.50437	7.78052	8.52815	8.50765	8.57387	7.30353	8.22472	7.87235	7.78656	7.29448	7.65733	7.03703	7.97879	7.54847	6.55741	7.64629	7.59243	7.51632	6.82518	7.73011	8.27999	7.66701	7.76574
Igfbp5	NM_010518	2	5.64386	5.64386	5.69872	6.51136	6.64959	7.39182	6.87696	6.71152	6.45042	6.28586	7.76087	7.32642	7.85171	8.45557	7.72378	6.47362	7.20328	5.64386	6.19936	6.42058	6.58831	6.21719	6.26621	6.26251	5.82774	7.01042	7.05743	6.41765	5.88401	7.30574	7.01552	6.79823	6.61316
Igsf23	NM_027308	2	5.77724	5.86842	5.85175	7.08784	7.42247	7.08116	7.24132	7.53682	7.2125	7.03299	6.77733	7.04943	7.55595	6.83937	6.66857	6.07202	7.28502	6.44069	7.05812	6.83531	6.97657	6.70347	6.4991	7.41339	7.94911	7.31284	7.26677	7.13132	6.04107	7.07192	8.46113	7.43119	6.42494
Igsf3	NM_207205	2	5.64386	5.64386	5.64386	7.84072	7.94054	7.81301	7.68183	8.10027	7.96657	7.39512	7.56131	7.54602	7.72473	7.08764	6.88607	6.16179	7.25829	8.35086	7.77254	6.42058	6.72966	6.45866	6.87555	6.59768	6.13734	7.59112	7.21721	7.17626	6.18269	7.10773	7.19372	7.2047	5.64386
Igsf5	NM_028078	2	5.64386	5.64386	5.64386	8.71162	8.3605	8.30555	8.33772	8.7251	8.69753	8.73734	8.41429	8.06447	8.42573	7.33826	7.89658	6.99708	7.90092	8.08314	8.86515	7.58981	7.18733	6.9762	7.23967	7.52245	6.27034	8.00402	7.11268	7.00414	6.96246	7.10773	8.02126	7.64709	6.42494
Il17rc	NM_178942	2	5.83958	5.79738	5.64386	10.4154	10.3256	10.6044	10.718	10.4717	10.0767	9.97881	9.56566	10.2103	10.528	10.0912	10.1992	8.95085	10.485	11.2454	10.2012	8.71727	9.01914	8.89366	8.71705	9.17677	8.6318	9.53441	9.55954	9.18198	7.94817	9.63908	10.6674	10.1923	8.63385
Il1rn	NM_031167	2	6.58516	6.76748	6.83213	9.37288	9.50956	9.4817	9.43379	9.36774	9.81518	9.81392	8.94315	9.09387	9.13402	10.478	10.8806	11.3505	10.368	9.60376	9.55124	9.04403	8.21735	9.18996	8.81749	7.82885	6.44933	9.00082	8.38108	7.75227	10.2398	9.42866	8.95986	9.48356	9.04698
Il22ra1	NM_178257	2	5.64386	5.64386	5.64386	8.02077	7.97495	7.6473	8.16178	8.35146	8.5111	7.2551	7.51402	7.35577	7.60004	7.21839	7.33747	6.84278	7.28502	8.22321	8.44662	7.58981	7.28219	6.58625	7.20712	7.64811	6.7057	7.50419	7.08532	7.00414	6.60798	6.99751	8.12257	7.68665	6.61316
Itga3	NM_013565	2	5.64386	5.64386	5.64386	8.85255	8.72635	8.71457	8.95344	9.19222	8.68937	8.17875	8.56111	8.43135	8.92464	8.32622	8.52609	7.5889	8.82588	9.07268	8.82496	7.58981	7.55972	7.44876	7.55623	8.13394	7.14737	7.34655	7.51252	7.27598	6.73606	7.61039	8.93222	8.13568	6.92887
Itga6	NM_008397	2	6.65617	6.56852	6.7305	10.1201	9.69126	10.2662	9.85794	10.039	10.1822	10.0943	10.0447	9.71705	10.3736	9.74578	9.67168	9.20424	9.98331	8.99663	9.91251	9.60269	9.61888	9.37215	9.74094	9.37156	9.53788	9.70653	9.48821	9.07925	8.94099	9.37823	10.1119	10.1147	8.34604
Itgb4	NM_133663	2	5.7121	5.79738	5.75154	10.2058	9.96814	10.519	10.2387	10.1525	10.4946	9.71583	9.58409	9.78065	9.96259	9.60148	9.91681	8.73385	10.167	9.32154	10.2323	8.32656	7.83472	8.19959	8.46515	8.09915	8.26821	8.40685	8.56069	7.86637	7.42841	8.58792	9.72727	9.14319	7.59756
Itih5	NM_172471	2	5.7121	5.72266	5.69872	10.9966	10.7045	11.1808	10.7775	10.7106	11.2012	10.1428	10.2141	10.6411	10.5618	10.0272	10.021	9.0364	10.5164	8.91635	10.4238	9.47837	9.33896	9.41861	8.76256	8.44226	9.09333	9.75753	9.90295	9.77328	7.22512	10.5119	8.9762	9.18523	9.17203
Itpkc	NM_181593	2	6.72383	6.97486	6.56322	8.20731	7.86916	8.10704	8.1954	8.05852	8.26438	8.06593	8.013	8.0909	8.11739	8.89417	9.00998	9.4014	8.55639	9.53373	8.41088	7.87922	7.50833	7.35631	7.39221	7.82885	6.75193	7.47401	7.79179	7.43236	7.60656	7.84066	8.49175	8.19175	7.40715
Itpr3	NM_080553	2	8.11709	7.26547	7.17932	9.44514	9.06661	9.79078	9.33918	9.21773	9.55728	9.01424	8.62483	8.97123	9.47906	9.06608	9.42043	8.49571	9.48058	8.99663	9.28608	8.44938	8.61976	8.04529	9.21944	8.38564	7.66493	8.42274	8.47894	8.2354	7.55539	8.84294	9.62738	9.29168	9.01394
Ivns1abp	NM_054102	2	8.26071	9.25597	8.53021	10.5525	10.2433	9.94457	10.3172	10.2204	10.8396	10.3668	10.0874	10.0801	10.0917	9.96649	10.041	9.92815	10.4292	9.42188	10.5667	10.4344	10.2706	10.0141	9.04629	10.7537	9.60868	10.379	10.0623	9.97328	10.101	10.5186	10.5881	10.7402	10.2425
Jakmip1	NM_178394	2	5.64386	5.64386	5.64386	7.46973	6.98959	7.96163	7.1064	7.55696	7.31148	7.16406	6.92927	7.37023	7.77687	6.72671	7.42693	6.60745	7.43581	6.58616	7.3118	6.74225	6.58831	6.74052	7.03239	7.20013	6.84016	6.51322	6.51726	6.44238	6.26993	7.03519	7.67939	7.30977	5.95359
Jun	NM_010591	2	10.8772	11.1611	9.73497	11.9326	11.7771	12.4432	12.6158	12.0484	11.2841	11.7143	11.31	12.7796	12.6829	13.5005	13.6288	13.5378	12.6274	13.1222	12.2996	10.8951	11.5752	11.751	11.8848	11.9447	10.833	11.6871	11.8453	11.749	11.6476	11.8568	12.273	12.1462	11.4532
Kank2	NM_145611	2	6.16583	5.86842	5.85175	7.67346	7.5189	8.04175	7.96135	7.77889	7.67589	7.47305	7.6602	8.17562	7.83951	8.16263	7.62138	7.55617	8.15395	7.32727	7.54408	7.41995	7.48192	7.59753	6.99475	7.23259	7.73565	8.42274	8.05417	8.05465	6.46741	8.12906	7.91228	7.43119	7.91635
Kcne3	NM_001190870	2	7.53619	7.84327	7.66582	10.9775	10.1635	10.8306	10.7803	10.8538	9.95443	11.0008	11.172	10.7038	11.2641	10.2371	10.7341	9.69996	11.4479	9.88258	10.481	9.46388	9.16733	8.65257	8.99001	9.36425	7.90887	9.68692	9.58906	8.80657	9.13356	9.5956	10.4854	10.5709	8.75874
Kcnk1	NM_008430	2	5.64386	5.64386	5.64386	9.65535	8.92421	9.15627	9.01123	9.43998	9.24023	9.38728	9.50164	8.8215	9.53312	8.34543	9.03295	7.95809	9.43355	7.87235	9.49686	8.04422	7.68073	7.47098	7.97879	8.34167	7.37118	8.29044	7.68648	7.16143	7.76511	7.79745	9.22886	8.71613	7.0641
Kcnk5	NM_021542	2	5.64386	5.72266	5.64386	9.04596	9.18156	8.78941	9.24597	9.2428	8.74553	8.65057	8.31293	8.64255	9.06755	8.26703	8.39034	7.79933	8.90558	8.39102	8.8452	8.19228	8.0656	7.49285	7.89954	7.62384	7.78095	7.93923	7.55303	7.75227	7.06359	7.77535	8.77926	8.29773	7.6841
Kcnn4	NM_001163510	2	7.3345	7.2389	6.33987	9.36113	8.92421	9.22161	9.08485	9.09917	8.80336	8.95211	9.40124	9.25442	9.4229	8.81372	9.07784	8.71914	9.40945	7.48402	8.85187	9.32639	9.3536	8.57264	9.06457	8.97088	8.59423	9.01136	9.33402	9.41857	7.50233	9.80097	10.3457	10.0891	10.5725
Kcnq1	NM_008434	2	5.64386	5.64386	5.64386	9.07502	8.22413	8.73537	8.67222	9.02884	9.25412	8.84872	8.57039	8.38939	9.12399	8.36438	8.26008	7.41726	8.72209	7.48402	8.47287	8.29414	8.38346	7.37998	8.80667	9.06403	8.28403	8.43845	8.85609	7.79131	7.33034	8.1635	9.46324	8.97766	8.17728
Kdelr3	NM_134090	2	5.64386	5.64386	5.64386	7.99059	7.29209	7.47662	7.17543	7.29457	7.14252	7.78962	7.8165	7.59607	8.45803	7.9023	7.76553	6.47362	7.57232	6.44069	7.36882	6.83531	6.89887	6.41349	6.69957	6.13091	6.50438	6.92376	6.99998	6.6478	6.31165	7.30574	7.55441	7.38384	7.18774
Kdf1	NM_001083916	2	5.64386	5.64386	5.64386	8.68045	8.16575	8.62081	8.30729	8.86086	8.5656	8.22453	7.8165	7.92458	8.88362	7.2994	8.05088	6.99708	8.09473	7.87235	8.44662	7.08309	6.81675	6.81188	7.42088	7.38479	6.7057	7.44318	7.64959	6.98743	6.73606	7.30574	8.33169	8.0624	6.61316
Kit	NM_001122733	2	5.64386	5.64386	5.64386	7.19761	7.1183	6.79448	6.99624	7.24579	7.08149	7.36818	7.46513	7.32642	7.65679	6.78414	7.3918	6.47362	7.31128	6.44069	6.86026	6.64279	6.48575	6.31868	6.79024	7.09812	6.79671	6.68114	6.67241	6.25957	7.03896	7.07192	7.46464	7.40771	7.76574
Kitl	NM_013598	2	5.64386	5.64386	5.64386	8.99619	8.13565	8.14899	8.39673	8.45164	8.5386	8.81919	8.8472	8.44507	8.12747	7.87613	7.9817	7.5889	8.66216	7.242	9.01555	8.15667	8.5324	8.32685	7.42088	7.84992	8.25222	8.79649	8.68437	8.08639	7.68801	8.32435	8.41394	8.5862	7.59756
Klf5	NM_009769	2	6.21368	5.86842	5.75154	12.3771	12.3581	13.0791	12.7141	12.5768	12.5068	11.5606	12.1094	12.4405	12.6944	11.5047	11.5259	10.3471	12.0758	11.8639	11.7402	10.7353	10.1161	10.2667	11.0126	11.3086	10.6376	10.8119	11.2554	10.5036	9.79389	11.2809	12.1451	11.9076	9.81399
Klk1	NM_010639	2	5.7121	5.64386	5.69872	13.5391	13.2188	13.6413	13.0508	13.2239	11.632	12.6611	12.842	13.0827	13.6301	12.4057	12.9993	11.2181	13.1745	12.1153	12.8596	9.95342	9.41768	9.16292	9.63483	9.47015	8.78416	9.84856	10.0693	9.18565	8.639	9.52452	10.6657	10.1957	9.39367
Krba1	NM_133922	2	5.77724	5.64386	5.75154	7.02966	7.755	8.01931	7.88096	7.36477	7.86883	6.6856	6.66058	7.04943	7.29498	7.37611	7.20211	6.99708	7.14608	7.6254	6.96257	6.00596	6.31678	6.70347	6.83352	6.06031	6.13734	7.01042	6.59692	6.68973	5.99059	7.14268	7.21223	7.00011	6.77963
Krt18	NM_010664	2	5.83958	5.93612	5.75154	12.2848	12.102	12.1309	12.3072	12.6211	12.4149	12.2368	12.4746	12.2689	12.5026	11.291	11.6712	10.4795	11.6516	12.6808	12.2069	10.3422	10.1032	9.95624	11.0405	11.7227	10.8675	10.8968	11.243	10.147	9.64682	10.5931	11.8802	11.3715	10.1081
Krt19	NM_008471	2	5.83958	5.72266	5.85175	15.1325	15.1883	15.2345	15.2823	15.0874	15.0414	14.5596	14.9959	14.7652	14.9835	13.8518	14.0757	13.3482	14.3266	14.4482	14.9392	13.0752	12.5952	12.4677	12.7015	13.2876	12.4442	13.1911	13.5251	12.9544	12.1178	13.0273	14.2062	13.784	11.9135
Krt20	NM_023256	2	5.64386	5.64386	5.64386	11.4117	10.9938	11.0692	11.3289	12.4021	12.1122	11.3853	11.7595	10.7391	11.7002	10.6267	10.2902	9.95978	10.5825	12.0666	12.3885	10.6223	10.4448	9.20329	9.38862	9.56243	9.29413	10.6594	10.1072	9.84925	9.18497	8.97484	10.841	10.0705	8.11634
Krt7	NM_033073	2	6.16583	6.2867	6.43986	10.1201	10.1334	10.2968	10.2507	10.4287	9.99637	10.0777	9.59095	9.91241	10.4071	9.08905	9.56537	8.33133	9.85089	8.64462	10.0291	9.11996	8.4666	8.45497	8.97075	9.36425	8.90159	9.12255	8.81503	8.22117	8.07471	8.60055	9.98307	9.26579	8.39818
Krt8	NM_031170	2	5.77724	5.79738	5.85175	14.7376	14.6406	14.8898	14.9701	14.8536	14.8104	14.3151	14.4209	14.5615	14.8024	13.552	13.4246	12.5469	13.6243	14.5531	14.5451	12.7109	12.1401	12.1713	12.5636	12.9337	11.7897	12.9838	13.0673	12.4222	11.5088	12.3112	13.5821	12.7905	11.183
Krtcap3	NM_027221	2	6.58516	6.69116	6.40728	10.2058	10.1598	10.02	10.0402	10.3673	9.89892	9.92899	9.75858	9.93932	10.4112	9.00701	9.75695	8.31186	9.73446	9.25782	9.70307	8.19228	8.36913	7.53564	8.17665	8.52322	8.16948	8.91356	8.78983	8.11745	7.37037	8.18041	9.38383	8.75387	7.84301
Lad1	NM_133664	2	5.64386	5.64386	5.64386	11.5841	11.1145	11.4318	11.381	11.559	11.7411	10.9266	10.8922	11.1421	11.4462	10.5625	11.0294	9.6849	11.1554	10.3378	11.2734	9.67999	9.36809	9.26816	9.16117	10.0138	8.96184	9.95619	9.96806	9.38387	8.26723	9.78447	11.366	10.5442	8.29195
Laptm4b	NM_033521	2	6.26001	6.12203	6.56322	9.20339	8.43654	9.1614	9.28554	9.45078	9.30573	8.76858	9.06957	8.5567	9.83005	9.04274	9.23966	7.77108	9.49782	8.35086	9.15715	8.32656	8.16852	8.36293	8.45132	7.80745	7.73565	8.84446	8.10954	8.10975	7.65598	8.29358	9.29112	8.54375	7.76574
Lgals4	NM_010706	2	6.0119	6.2867	5.89937	15.1432	15.4929	15.4535	15.2802	15.2532	15.2386	14.6787	15.1011	15.1516	15.1069	13.9122	14.0892	12.9401	14.2305	14.8723	14.9498	13.1186	12.6956	12.7955	12.7239	13.7202	13.3657	13.5442	13.6395	13.0683	12.4059	12.8746	13.8154	13.4426	11.8494
Lgals6	NM_010707	2	6.0119	6.23387	5.80253	14.8706	15.1714	15.0392	15.008	14.9799	14.9299	14.4001	14.8706	14.8191	14.795	13.7265	13.8817	12.7496	14.0337	14.6042	14.6595	12.8706	12.4264	12.4705	12.2499	13.5	13.2233	13.2362	13.3537	12.7559	12.1178	12.703	13.6255	13.2624	11.6434
Lgalsl	NM_173752	2	5.7121	6.2867	5.94544	8.75417	8.37346	8.03057	8.52129	8.76026	9.00086	8.36741	8.48957	8.21619	8.58043	7.82232	7.79271	6.94746	7.93508	7.87235	8.652	7.64225	7.87586	7.73238	6.91639	8.0635	7.34126	8.30766	7.47084	7.27598	7.01391	7.36613	7.85455	7.47703	7.30162
Lgr4	NM_172671	2	5.83958	5.64386	5.75154	8.92349	8.74641	8.95817	8.59873	8.3046	9.32429	8.54628	8.33487	8.92303	8.4739	8.00248	8.42549	7.65222	8.77963	7.98159	8.95478	8.19228	7.63354	6.87987	7.74942	7.62384	6.7057	8.08613	7.79179	7.53944	7.20312	7.5069	8.43773	8.52205	6.92887
Lhfpl2	NM_172589	2	6.0119	5.93612	5.75154	7.64791	7.69435	6.71293	7.77374	7.72652	7.72461	7.31275	7.55198	7.29647	7.51049	7.13256	7.00705	7.09148	6.62474	9.67054	8.05326	6.74225	7.18733	7.17874	6.87555	6.82759	7.59056	7.56272	7.16589	7.10056	6.93603	7.03519	6.90608	6.6856	7.0641
Liph	NM_001289582	2	5.7121	5.72266	5.64386	8.97065	8.37346	8.87937	8.73073	9.29768	9.28963	8.36741	8.34572	8.45866	8.73997	7.79464	8.45981	7.04505	8.66216	8.46814	8.86515	7.78904	7.53425	7.00694	7.607	7.49594	7.27948	8.025	7.8417	7.16143	6.43002	7.07192	8.31466	7.9036	7.18774
Lmna	NM_001002011	2	6.30489	6.00079	6.43986	12.5072	12.5168	12.4827	13.0548	12.3832	12.6074	12.0407	12.4195	12.5564	12.4408	12.6977	12.7706	13.5012	12.9169	12.1855	11.9954	10.6862	10.3162	10.3972	10.2363	10.6403	10.9442	10.5037	11.3432	10.6462	11.0071	11.2085	11.5806	11.4796	11.3967
Lnx1	NM_001159577	2	5.64386	5.64386	5.64386	7.87417	7.29209	7.69055	7.88096	7.81277	7.94618	7.5708	7.35135	7.73657	7.5855	7.21839	6.7261	6.72991	7.55045	7.32727	7.75838	6.83531	6.58831	6.45866	6.83352	7.62384	6.13734	6.68114	7.40597	6.77012	6.5741	6.83609	7.66603	7.33488	6.42494
Lpar1	NM_010336	2	5.64386	5.64386	5.64386	8.60276	8.84271	8.77609	8.41112	8.62376	8.6224	8.42082	8.57039	8.36072	8.76601	9.11166	8.24048	7.98294	8.43032	8.08314	8.45543	7.69287	7.72644	8.49888	8.59659	8.23354	8.26821	8.61478	8.76418	8.56323	8.49252	8.99411	8.60813	8.63757	8.29195
Lpin3	NM_001199118	2	5.64386	5.64386	5.64386	7.64791	7.77467	7.90155	7.53195	7.72652	7.86883	7.66235	7.36207	7.49418	7.8272	7.58442	7.81939	6.94746	7.43581	7.242	7.90694	7.00512	6.77386	7.00694	6.74561	6.69409	6.88234	6.68114	6.99998	6.86467	6.39163	6.70192	7.58314	7.30977	6.61316
Lpp	NM_178665	2	7.3345	7.69482	7.45896	10.0967	10.0308	9.70901	9.88395	9.98062	10.1749	9.92437	9.65557	9.91241	9.99871	9.21967	9.15841	9.27635	9.58109	9.02243	9.95967	9.38912	9.2712	9.39557	8.72856	8.81882	8.88094	9.91747	9.45118	9.11816	8.44645	9.85465	9.35497	9.49475	9.17203
Lrba	NM_030695	2	6.43172	6.69116	6.19478	9.19459	8.90649	8.59068	9.1377	9.23658	9.16868	8.71613	8.56576	8.74593	8.77244	8.24675	8.62013	7.88089	8.71227	7.98159	8.81815	8.19228	8.21735	7.8557	8.1078	8.21741	7.45741	8.29044	8.20161	8.01396	7.18078	8.68595	8.64946	8.2849	8.0527
Lrfn4	NM_153388	2	6.11632	5.72266	5.64386	8.17188	7.4715	7.96163	7.96135	8.07257	7.99994	7.72738	7.71141	7.71409	8.18649	7.51828	7.59074	6.60745	7.95187	6.58616	7.54408	6.74225	7.01391	6.70347	6.55189	6.43981	6.75193	6.92376	6.99998	6.68973	5.82762	6.79274	7.92356	7.45429	6.92887
Lrig1	NM_008377	2	5.64386	5.72266	5.64386	9.07981	8.15078	8.3331	8.59873	9.00705	8.77281	8.90603	8.58419	8.66031	9.1139	8.00248	8.41678	7.48839	9.01345	7.242	8.56521	8.35826	7.97385	7.82153	8.01685	8.4833	7.07647	8.21945	7.90566	7.31669	7.37037	7.70694	8.82807	8.46632	7.50549
Lrrc1	NM_001146048	2	5.95673	5.79738	6.07549	8.00072	7.73507	8.14899	8.22827	8.32822	8.11403	7.82966	8.07948	7.66803	8.33299	7.37611	7.68078	6.89607	7.71679	8.17801	8.13223	7.29448	7.58475	6.74052	7.607	7.76369	6.88234	7.61897	7.11268	7.08494	7.24679	7.24271	7.66603	7.40771	7.30162
Lsr	NM_001164184	2	8.87333	8.53137	9.0139	10.7244	9.5839	10.2397	10.5132	10.825	10.5509	10.0009	9.50164	9.74505	10.8351	9.74578	10.0037	8.88647	10.2542	9.34218	9.76101	10.0919	9.80611	9.10728	10.3525	9.99028	9.02908	10.4697	9.98667	9.14478	8.52835	9.28746	11.1502	10.311	8.54415
Lurap1l	NM_026821	2	5.64386	5.64386	5.64386	10.2742	9.75205	10.2898	10.0631	10.4611	10.326	9.75794	9.94308	9.82592	10.4276	9.18811	9.82435	8.87325	9.71493	10.0424	10.3216	8.32656	8.10074	7.28287	8.35062	7.82885	7.78095	8.89089	8.0112	7.8572	7.03896	7.88261	9.03456	8.32305	7.30162
Luzp1	NM_024452	2	7.29054	6.97486	6.80738	9.2466	9.09817	9.22651	9.05768	9.02884	9.05583	8.90603	8.78082	8.66031	9.13901	9.03093	9.03295	8.57953	9.24215	8.91635	9.22048	8.50709	8.58297	8.72829	8.35062	8.21741	8.18641	8.79649	8.57059	8.76304	8.19104	8.26214	9.08062	8.80867	8.11634
Ly6a	NM_001271446	2	6.47164	6.2867	6.37398	10.6231	11.0634	10.7167	10.3549	10.8354	10.953	10.443	10.7857	10.9843	10.9071	11.67	11.7109	11.2619	11.2635	10.1041	11.4522	10.5139	11.6015	11.0057	10.8613	9.88699	10.8728	11.1373	10.6364	10.9499	10.1099	10.9594	10.4624	10.9128	10.2847
Lypd8	NM_001083884	2	5.89934	5.86842	5.69872	15.4257	15.7701	15.4397	15.2998	15.7669	15.7537	14.6352	14.3446	15.0827	15.0826	14.8199	14.7147	13.8422	14.921	14.5773	15.3444	12.6799	12.4538	11.8497	11.9002	12.4696	11.5541	12.9479	12.2536	12.2642	11.2704	12.3064	13.2517	12.7601	11.0011
Lzts3	NM_197945	2	5.89934	5.86842	6.07549	8.93411	8.66445	9.07156	8.66023	8.51476	8.82214	8.73734	8.32942	8.44507	8.76601	8.26703	8.09522	7.62091	8.53427	7.48402	8.65963	8.04422	7.55972	7.55657	7.81568	7.89118	7.24757	8.46938	7.75753	7.43236	7.24679	7.86178	9.06033	8.57571	7.18774
Maged1	NM_019791	2	5.64386	5.79738	5.64386	7.68608	6.69158	7.37425	7.58366	7.74419	7.2125	7.5708	7.49466	6.97573	8.59503	7.67829	7.35581	6.94746	7.45948	6.71832	6.8335	6.92271	7.0858	6.9762	7.03239	6.94979	7.03969	7.72529	7.02899	7.13132	6.76638	7.21014	7.35231	6.6856	7.0641
Magi1	NM_001286785	2	5.64386	5.64386	5.64386	7.93883	7.49539	7.75986	7.88096	7.40975	8.23104	7.5708	7.54258	7.99156	7.86381	6.99339	7.4947	6.40175	7.33706	8.30955	7.82781	7.29448	7.53425	7.49285	7.06907	7.23259	7.27948	7.31284	7.31468	6.98743	6.26993	6.91905	7.40153	7.30977	6.20842
Mal	NM_010762	2	5.64386	5.64386	5.64386	6.77017	6.41912	6.46982	6.55304	6.97359	6.89546	6.22711	8.04663	6.63629	7.10411	6.24422	5.96382	6.40175	6.49334	5.88792	8.22779	6.64279	6.58831	6.6264	5.98832	6.43981	6.39209	6.25378	7.11268	6.36685	6.18269	5.9893	5.98256	6.28283	5.95359
Mal2	NM_178920	2	5.64386	5.64386	5.64386	10.1224	9.69126	9.3841	10.0309	9.96939	10.4958	10.1388	10.0809	9.4508	9.05705	8.43779	8.77125	8.12362	9.26248	9.44113	10.3478	9.26081	8.48	8.18623	7.95938	8.76434	8.40469	9.30506	8.74682	8.52321	7.52023	8.58792	9.37153	9.2058	7.50549
Mall	NM_145532	2	5.64386	5.64386	5.64386	9.40756	8.75633	8.59827	9.51593	9.99544	9.3374	9.17831	8.86615	8.41052	9.38561	8.69896	8.77806	7.71287	8.65192	9.12124	9.76809	7.96408	7.91586	7.23175	7.93971	7.44143	6.79671	8.62855	7.74009	7.83868	6.96246	7.4241	9.4438	8.42012	7.18774
Maoa	NM_173740	2	5.95673	6.00079	6.03345	11.6379	11.1048	11.0332	11.7023	11.9222	11.6589	11.3479	11.2918	11.2259	11.6512	10.6384	10.695	9.92174	10.7858	11.3561	11.7203	9.77701	9.54429	9.34835	9.53347	9.76467	8.26821	10.1404	9.86725	9.39342	8.54593	9.07775	10.2945	9.95376	7.98614
Map1lc3a	NM_025735	2	7.45887	7.34234	7.58077	8.72391	8.47311	8.54429	8.64814	9.16624	8.53406	8.22453	8.45993	8.89332	8.98684	9.60148	9.37169	8.97581	9.43951	9.21371	8.20709	7.83484	8.0296	8.70036	8.25834	8.44226	9.57693	8.97949	9.23167	8.52321	8.41808	9.27176	9.15425	8.72566	8.44849
Mapt	NM_001038609	2	5.64386	5.64386	5.64386	7.45507	7.755	7.47662	7.55804	7.4957	7.77944	6.59556	6.8704	7.04943	7.44754	6.83937	6.91109	6.54209	7.48276	6.0966	7.2725	6.92271	7.0858	6.6264	6.652	6.94979	6.84016	6.83155	7.05743	6.5601	6.04107	6.83609	7.13672	6.79823	6.77963
Marveld2	NM_001038602	2	5.7121	5.64386	5.64386	8.10771	7.58722	7.83887	7.96135	8.23133	8.00652	7.72738	7.28527	7.29647	8.08674	7.21839	7.30008	6.99708	7.52824	7.48402	7.88104	6.83531	6.81675	7.00694	6.91639	7.20013	6.27034	7.27833	6.90927	6.71026	6.70509	7.03519	7.75708	7.64709	6.61316
Mcoln2	NM_026656	2	5.64386	5.79738	5.69872	8.02077	7.37172	7.16531	7.99992	7.95611	8.10179	7.86863	7.56131	7.52034	8.05542	6.78414	7.94584	7.22241	7.7363	6.83937	7.4937	6.74225	7.01391	6.9127	7.30263	7.38479	7.00193	7.05187	6.97037	7.31669	7.38998	7.03519	7.81876	7.74402	7.0641
Mcu	NM_001033259	2	6.99431	6.9423	6.94986	9.28441	8.88855	9.42308	9.07585	9.32141	9.48372	9.17831	8.99574	8.8215	9.58887	9.07761	9.27863	8.35055	9.25573	9.53373	9.15174	7.83484	7.91586	7.90548	8.25834	8.11665	7.94911	8.61478	8.52039	8.00569	7.22512	8.24616	9.76537	9.11448	7.0641
Mep1a	NM_008585	2	5.64386	5.64386	5.64386	9.49258	9.44353	9.77747	9.62484	10.1755	9.65895	8.99676	9.66426	8.97597	9.58156	8.59046	8.61252	7.55617	8.63124	9.76526	9.73595	8.22704	7.15428	6.9448	7.42088	7.57403	7.71247	8.37454	7.33805	7.24818	7.5897	8.07581	9.317	8.23241	6.20842
Mep1b	NM_008586	2	5.64386	5.64386	5.64386	8.99619	8.8795	8.53641	9.11152	9.68834	8.89843	8.63935	8.82412	8.7348	8.91304	7.87613	7.35581	6.89607	7.81179	8.64462	9.39073	8.71727	8.27999	7.93774	8.01685	8.62455	7.5649	9.84856	8.56069	9.03926	7.80946	8.05761	9.81767	9.07775	6.77963
Mgam	NM_001171003	2	5.83958	5.79738	5.75154	10.5832	10.3189	10.1156	9.89934	10.2423	10.654	10.5843	10.1872	9.78336	10.266	9.16668	9.6195	8.97581	9.98739	9.55156	10.4483	10.8117	10.1791	10.1057	10.0145	11.4132	10.0991	11.3763	10.8425	10.5211	9.86567	10.5868	11.7302	11.7202	9.69399
Mgat3	NM_010795	2	5.64386	5.64386	5.64386	8.98092	8.53207	8.96992	8.96324	9.07843	8.95055	8.4974	8.47976	8.47881	9.17346	8.00248	7.88399	7.30353	8.31829	8.22321	8.73385	7.83484	7.60935	7.37998	7.85822	7.49594	6.50438	8.1826	8.23934	7.43236	6.98841	7.68341	8.21724	7.74402	7.0641
Mgat4a	NM_173870	2	6.39067	6.33766	6.11636	10.6459	10.777	10.5584	10.6769	10.802	10.7266	10.1546	9.87919	10.0194	10.3778	10.147	10.2417	10.1582	10.3897	10.3783	10.4527	9.95342	9.79543	9.92439	10.9864	9.91226	8.7504	10.0766	9.79731	9.35484	10.4737	10.3077	10.4192	10.0668	9.34137
Mgat4c	NM_026243	2	5.64386	5.64386	5.64386	11.126	10.3223	10.5949	9.96905	10.3501	11.1239	11.4574	11.0817	10.0624	10.1497	8.79986	8.77125	8.49571	9.26919	10.2089	11.7483	9.40438	8.54521	7.33224	8.67007	8.11665	6.88234	9.62647	8.46839	8.50571	8.31929	7.88261	9.02935	8.63757	6.61316
Mgst2	NM_174995	2	7.3345	7.03785	6.64928	10.2742	10.2184	9.97112	10.0027	10.3815	10.635	10.0984	10.1902	10.1941	10.38	8.71381	9.3398	7.74227	9.78217	10.0798	10.4148	9.08249	8.7582	8.91001	9.25967	9.59401	8.61939	9.93972	9.83476	9.25363	8.58047	9.01312	10.0045	9.5917	7.50549
Mical2	NM_177282	2	5.95673	5.79738	5.75154	8.41096	8.3605	8.98736	8.39673	8.54532	8.5656	8.28339	7.95043	8.18383	8.53573	8.09616	8.26008	7.62091	8.81675	8.46814	7.77254	6.53596	6.77386	7.61758	7.55623	7.06243	7.07647	7.50419	8.06821	7.69165	6.88166	8.07581	8.21724	8.01657	8.11634
Mkrn2os	NM_001101431	2	5.64386	5.64386	5.64386	8.85255	8.8795	9.10391	8.84108	8.86086	9.23183	8.4468	8.41944	8.64255	9.19278	8.63796	8.5422	7.41726	8.72209	8.08314	8.67478	7.83484	7.896	6.9762	8.32051	7.09812	7.78095	8.52931	7.93661	7.61755	6.79608	7.55957	8.93222	8.43181	7.0641
Mlph	NM_053015	2	5.7121	5.64386	5.64386	8.89118	8.77598	8.8415	9.1203	9.08538	9.00743	8.97014	8.06643	8.39647	9.13901	8.45557	8.88926	7.77108	8.61024	8.46814	8.94231	7.47883	7.25126	7.33224	7.36297	7.52245	7.11236	7.84803	7.98183	7.03701	6.79608	7.5069	8.70279	8.03201	6.77963
Mpi	NM_025837	2	6.96664	6.8749	7.30838	9.38839	9.35486	9.37086	8.99222	9.1331	9.24302	9.06545	9.04648	8.99007	9.3602	8.77174	9.02725	8.52982	9.05288	9.63754	9.32021	8.08269	8.01126	7.83871	8.24237	8.1846	7.66493	8.61478	8.48942	7.89354	8.09874	8.21366	9.16853	8.85281	7.84301
Mpp5	NM_019579	2	6.30489	6.48056	6.19478	8.26729	8.0735	7.493	8.12734	8.39684	8.42037	8.25426	8.08597	8.14233	8.16708	7.51828	7.2421	7.38034	7.63602	8.30955	8.81131	7.96408	8.16852	7.49285	7.27149	7.54847	7.84632	8.10595	7.88994	7.92898	7.37037	7.61039	7.80663	7.86964	7.50549
Mpzl1	NM_001083897	2	5.64386	5.79738	5.69872	8.06971	7.17859	7.4433	7.45073	7.98612	7.97331	7.74843	7.19219	7.32642	8.27978	7.76642	7.62138	6.66998	7.98486	5.88792	7.52748	7.74176	7.99267	7.51441	8.12533	7.09812	8.18641	8.1826	7.88994	7.48094	6.5741	7.94333	8.3816	7.9531	7.18774
Mpzl2	NM_007962	2	5.64386	5.64386	5.64386	8.41096	8.56632	7.85163	8.48096	8.56533	9.04628	7.78962	7.77699	8.06447	8.16708	7.95326	7.46121	7.13646	8.00108	7.05469	8.78362	7.53538	7.79238	7.03703	6.87555	7.35561	6.44933	7.75069	7.38368	6.98743	7.38998	8.14638	8.35686	7.74402	7.40715
Msi2	NM_054043	2	6.43172	6.9423	6.85646	9.36897	8.92421	9.2314	8.99222	9.27355	9.39622	8.97907	8.62483	8.96649	9.21184	8.09616	8.58946	7.55617	8.85294	7.69121	8.79754	8.44938	8.81218	8.37477	8.20988	7.62384	8.99104	8.42274	8.78133	8.58562	7.28917	8.64997	8.5365	8.54375	8.23576
Msmo1	NM_025436	2	6.69039	7.41533	7.12027	10.2275	9.7815	8.72154	9.95439	9.62777	10.2195	9.8678	9.08906	9.63863	9.80516	9.916	10.2368	9.32574	10.2609	8.83133	10.0379	8.69261	8.94376	8.18623	8.01685	8.08143	7.11236	9.07307	8.39229	8.14031	8.31929	9.02253	9.41213	9.2058	8.79808
Mst1r	NR_109782	2	6.85034	6.43448	6.30495	8.84694	8.42415	8.99888	8.46726	8.75155	8.52492	8.36741	8.12426	8.43135	8.4974	7.64767	8.29851	7.38034	8.22472	7.928	9.11333	7.96408	7.60935	7.49285	7.63174	7.74131	6.84016	7.89435	7.79179	7.36925	6.60798	7.14268	8.39786	7.86964	7.30162
Mt1	NM_013602	2	8.60379	8.30681	7.71986	11.4426	10.8529	11.4675	11.154	11.6438	12.1011	11.6017	12.0464	12.4124	12.2919	12.3651	12.3241	12.6934	12.2698	11.2779	10.6781	10.5279	10.4985	10.8321	11.9391	11.822	11.8347	11.6249	11.4964	11.5037	12.12	11.8182	11.8982	11.7285	11.2765
Mt2	NM_008630	2	5.7121	5.64386	5.64386	9.9104	8.53207	9.19182	8.62365	10.021	10.7206	9.70511	10.166	10.6231	10.9686	9.8503	9.18942	9.97224	9.42756	9.30061	9.19967	8.78881	9.09077	8.56233	9.83978	9.38606	10.415	10.3419	9.85109	9.15605	9.61385	8.70945	9.24243	8.10681	8.49711
Mtmr11	NM_181409	2	5.7121	5.64386	5.64386	8.46319	8.25245	8.65031	8.45342	8.79458	9.28152	8.25426	7.96457	7.93435	8.34167	8.45557	8.2206	7.34245	8.01711	7.6254	8.85853	7.74176	7.28219	7.35631	6.83352	7.13293	6.65794	8.1826	7.80862	7.36925	6.08984	7.45222	8.0829	7.81713	6.92887
Muc13	NM_010739	2	5.7121	5.72266	5.75154	12.7778	12.4784	12.659	12.7199	13.0713	13.0712	12.0889	11.4173	12.3833	12.553	12.5503	12.8764	11.6948	12.8401	12.1153	12.7436	11.0487	10.8004	9.96017	11.2164	10.7593	9.86151	11.4634	10.615	10.0776	9.74144	10.5547	12.2271	11.6581	10.0604
Muc2	NM_023566	2	5.64386	5.86842	5.69872	13.9973	13.0606	13.8197	13.518	13.532	12.5278	13.7995	14.1195	13.2697	14.5851	13.1399	13.6594	11.9011	13.212	12.4122	13.0478	11.0143	10.4618	9.91227	11.3151	11.3048	10.5811	11.1007	11.4136	10.1166	10.4575	11.3739	13.0926	12.4761	11.5658
Muc4	NM_080457	2	5.64386	5.64386	5.64386	9.36505	8.53207	8.50445	8.62365	9.32728	8.20839	9.34646	9.15529	8.71795	9.28568	7.76642	8.46827	6.94746	8.72209	8.03326	8.83174	8.26098	8.24901	7.57719	7.97879	7.62384	7.3107	8.06604	7.13953	6.97052	7.13504	7.14268	7.97865	7.85235	6.42494
Myh14	NM_028021	2	5.64386	5.64386	5.64386	10.6491	10.676	10.525	10.8663	10.6345	10.634	10.1106	10.0481	10.0712	10.3904	10.607	10.2269	9.26627	10.4111	11.8241	10.5483	8.50709	8.48	8.04529	8.53236	8.84004	7.82486	9.17039	8.68437	8.37687	7.70377	9.1396	10.437	9.72116	8.29195
Myo10	NM_019472	2	5.64386	5.72266	5.75154	8.38799	8.0735	8.46348	8.29182	8.19324	8.45927	8.17875	8.09885	8.30914	8.30664	7.87613	8.06209	6.99708	7.67697	8.91635	8.27827	7.53538	7.99267	7.51441	7.8371	7.78574	7.3107	7.82431	8.12306	7.53944	7.53792	7.77535	7.93475	7.83485	6.92887
Myo1a	NM_001081219	2	5.64386	5.64386	5.64386	11.6435	11.5705	11.7718	11.7384	11.5639	12.059	11.1347	10.9861	11.1948	11.3343	10.9426	11.0991	10.0029	11.0286	12.2714	11.7661	10.1564	10.3603	9.89594	10.2444	10.5336	8.65631	10.9025	10.5909	10.3584	9.34922	10.1662	11.7059	10.9879	8.91005
Myo1d	NM_177390	2	5.64386	5.64386	5.64386	10.6215	10.0349	10.521	10.4132	10.5391	10.7196	10.0441	9.86983	9.83637	10.5413	9.70175	9.93522	8.8191	10.0156	9.42188	10.5421	9.44923	9.16733	8.31462	9.44552	9.27355	7.84632	9.51971	9.42959	8.81607	7.70377	9.27176	10.1119	9.73537	8.17728
Myo1e	NM_181072	2	5.7121	5.64386	5.64386	8.30048	8.20976	8.43833	8.46726	8.46236	8.18537	7.92517	8.17379	8.07333	8.52815	8.60647	8.68684	8.7771	8.47745	9.47889	8.21748	7.83484	7.50833	7.71387	8.07211	7.29541	7.64057	8.10595	7.79179	7.53944	8.50156	8.0016	8.20805	7.68665	7.30162
Myo5b	NM_201600	2	5.64386	5.64386	5.64386	9.20777	8.7857	8.78277	9.01123	9.58918	9.53697	9.04858	9.21269	8.79496	9.39398	8.24675	8.33595	7.48839	8.52308	9.07268	9.4883	8.38927	8.26458	7.88908	7.8371	7.97032	7.78095	8.96871	8.38108	7.88454	7.28917	7.94333	9.47478	8.5862	7.30162
Myo6	NM_001039546	2	5.64386	5.64386	5.69872	10.0753	9.81987	9.95348	9.8891	10.1949	10.2887	9.75275	9.55635	9.68562	9.9456	8.77174	9.2495	7.88089	9.20763	10.1162	10.1614	9.50694	9.39664	8.62311	8.42326	9.24996	8.37545	9.33895	8.87219	8.79701	8.51055	8.3693	9.47861	9.23277	7.6841
Myo7b	NM_032394	2	5.64386	5.64386	5.64386	9.26353	9.09035	9.02727	9.03928	9.47743	9.10572	8.47232	9.06629	8.85272	9.22598	8.22617	8.47667	7.68287	8.69243	9.19114	9.09655	7.87922	7.93545	7.69512	8.17665	8.44226	7.78095	8.27302	7.66815	7.72228	6.82518	7.81921	9.02935	8.71613	7.0641
Naprt	NM_172607	2	6.34843	6.23387	6.23243	9.15431	9.28802	9.21175	9.49583	9.39595	9.16868	8.72678	9.13355	8.88327	9.13402	8.32622	8.31735	7.48839	8.40616	9.14492	9.03916	7.58981	7.72644	7.55657	8.09006	8.21741	7.78095	8.25538	8.2761	7.70194	6.79608	7.70694	8.24447	8.09216	7.40715
Ncald	NM_001170868	2	5.64386	5.64386	5.64386	8.41096	7.83211	7.94982	7.90148	8.19324	8.35998	7.76917	7.98553	8.01014	8.41754	7.25947	7.42693	6.54209	8.03298	6.95104	7.78656	7.35858	7.65733	7.23175	7.44898	7.41339	6.96315	7.69943	7.2422	7.14645	7.03896	7.30574	7.53983	7.45429	6.92887
Nck2	NM_010879	2	5.64386	6.00079	6.19478	8.30048	7.79407	8.09637	7.86014	8.46236	8.87704	8.06593	7.58896	7.6325	8.35888	7.55172	7.54351	6.54209	7.79328	7.87235	8.14316	7.83484	7.77073	7.35631	7.53016	7.46895	6.33251	7.56272	7.19178	7.49282	6.64108	7.5069	7.87792	7.68665	7.0641
Nckap1	NM_016965	2	5.7121	5.72266	5.69872	10.449	9.88464	9.46519	10.1642	10.3558	10.326	10.0736	9.76263	9.69713	10.0657	8.34543	8.98073	8.18913	9.53171	7.75415	10.0698	8.90068	9.51204	8.73748	8.73998	8.84004	9.42828	9.45937	9.40213	8.91661	7.97439	8.82153	9.85053	9.47229	8.23576
Ndrg2	NM_013864	2	5.7121	5.64386	5.64386	11.0861	11.0754	11.0485	11.4833	11.2138	11.2012	10.3566	10.5197	10.836	11.0032	10.2007	10.4798	9.09454	10.8588	10.017	10.5606	8.616	8.27999	8.44378	8.38011	8.67267	8.02637	8.83261	9.08052	8.48799	7.57265	8.50977	9.17326	8.4434	8.11634
Ndufa12	NM_025551	2	8.60379	8.31954	8.25626	10.2489	10.4409	10.4825	10.1978	10.0709	9.86129	10.3497	10.3617	10.5393	10.2864	9.92241	10.2589	9.58297	10.0472	10.092	10.1587	9.52101	9.02829	9.15608	10.1913	9.64314	9.13753	9.40442	9.73265	9.30849	9.54119	9.64519	10.0945	9.79088	8.75874
Ndufa5	NM_026614	2	8.52061	8.39366	7.82221	10.7183	10.7549	10.7948	10.572	10.4149	10.3233	10.8012	10.6169	10.7529	10.5563	9.8368	10.1396	9.24589	10.138	10.6752	10.3921	9.86791	9.4107	9.41861	9.72379	9.64917	8.79524	10.2289	10.0658	9.54389	9.24541	9.91148	10.0412	10.0288	9.2871
Ndufc1	NM_025523	2	7.95758	7.96172	7.66582	10.0265	10.0632	10.034	9.27771	9.37342	9.67968	9.90107	9.85092	9.74505	9.50248	9.53613	9.99202	9.01247	9.93348	9.30061	9.93785	9.34233	8.78004	8.84345	9.50697	8.54923	8.18641	9.33895	8.90385	8.75319	8.92763	9.69313	9.54217	9.6923	8.49711
Nectin2	NM_001159724	2	5.77724	5.79738	5.69872	8.92349	8.77598	8.52849	8.86217	9.11284	8.74946	8.2689	8.52817	8.58175	8.89546	8.32622	8.7506	7.95809	8.81675	9.96471	8.71198	7.47883	8.18498	8.14537	8.40902	8.11665	7.5649	8.69547	8.41445	7.66036	7.94817	8.26214	9.18737	9.01698	8.39818
Nectin3	NM_021495	2	5.64386	5.64386	5.64386	9.09407	8.82396	7.88924	8.80885	8.85274	9.059	9.15486	9.23911	8.31663	8.20564	7.44894	7.65138	6.84278	8.15395	8.54134	9.2153	8.47852	8.31032	7.98482	7.47655	7.98944	7.61578	8.23753	8.78133	8.14785	7.38998	8.24616	8.82807	8.69689	7.0641
Nedd4	NM_010890	2	5.77724	5.64386	5.80253	10.6919	9.92919	10.0058	10.3843	10.6369	10.5576	10.3007	10.2693	10.2712	11.0384	9.65634	9.92911	8.46076	9.95029	8.70958	10.2949	9.98422	10.0185	9.80268	9.88677	9.60645	9.58333	10.2952	10.3217	9.86992	8.90055	9.76778	10.2481	9.73537	9.20167
Neo1	NM_001042752	2	5.7121	5.72266	5.89937	7.94933	7.14876	7.66186	7.77374	8.05852	7.57325	7.42157	7.5236	7.5587	8.3503	8.02648	8.1276	6.99708	8.29217	7.48402	7.35006	7.15704	7.01391	7.15149	7.13975	7.29541	7.14737	7.67311	7.2422	7.10056	6.39163	7.84066	8.33169	7.93679	7.0641
Net1	NM_001047159	2	7.53619	7.21184	7.29064	10.6762	10.676	10.4907	10.4024	10.5135	11.1853	10.443	10.1066	10.1633	10.5692	9.45888	9.72908	9.4378	10.0819	10.2961	10.7954	10.1832	9.93821	9.02708	9.81839	9.69065	8.13501	9.99921	9.55456	9.35484	8.69524	8.93552	10.0995	9.80892	8.39818
Nfia	NM_010905	2	6.06506	6.23387	6.03345	8.64212	8.50877	8.23914	8.10981	8.35146	8.42529	8.28339	8.3883	8.34617	8.30664	8.09616	7.84558	7.18007	8.13937	6.83937	8.07627	8.15667	8.23327	7.93774	7.63174	7.95093	7.90887	8.1255	8.0959	8.16281	7.62322	7.98244	7.90092	8.39646	7.6841
Nfib	NM_001286131	2	5.64386	5.72266	5.64386	10.3475	9.69643	10.0228	9.74893	10.0917	10.1632	9.73704	9.85852	10.155	10.1448	9.19871	9.02151	8.35055	9.46312	8.97036	9.53056	9.95342	10.4952	10.3105	9.91223	9.7423	9.73488	10.2289	10.4532	9.76595	8.78683	9.6019	10.0308	10.0705	9.17203
Ngef	NM_001111314	2	5.64386	5.64386	5.64386	8.27566	7.83211	8.71457	8.01883	8.32822	8.8109	7.94353	7.58896	8.05556	8.1961	7.13256	7.69526	6.84278	7.75554	6.95104	7.89405	7.29448	7.01391	6.36686	7.03239	6.59768	7.03969	7.24296	6.81249	6.58253	6.50386	6.83609	7.87792	7.43119	5.95359
Nhsl1	NM_001163592	2	5.64386	5.64386	5.64386	7.7714	7.42247	7.55671	7.24132	7.4957	7.86159	7.59424	6.88534	7.52034	7.80225	6.94386	7.37392	6.54209	7.33706	7.928	7.60862	6.64279	6.53795	6.50246	7.03239	6.43981	5.99084	6.92376	6.67241	6.77012	6.46741	6.44624	7.41757	7.28421	6.20842
Nipal1	NM_001081205	2	5.64386	5.64386	5.64386	8.67413	7.71485	8.16951	8.1954	8.52502	8.95396	8.35374	8.57039	8.22418	8.58775	7.48403	7.51115	6.94746	8.01711	8.54134	8.45543	6.53596	6.93825	6.31868	6.60281	7.32583	7.24757	7.61897	7.16589	7.02067	6.08984	7.45222	8.49175	8.00096	6.92887
Nipal2	NM_145469	2	5.64386	5.64386	5.64386	7.74754	7.26455	7.26405	7.81759	7.72652	7.97331	7.90657	7.09269	7.23462	8.1961	7.21839	7.89658	6.72991	7.69702	6.44069	7.65521	6.64279	6.68408	6.74052	6.55189	6.94979	5.73874	7.13137	6.43294	6.41765	6.26993	6.60502	7.5251	7.40771	6.20842
Nipsnap1	NM_008698	2	6.30489	6.61057	6.50286	9.25931	8.50877	9.36642	9.10268	9.23032	9.14502	9.07381	9.00945	9.24269	9.32561	7.70827	8.64271	7.48839	8.96466	8.64462	8.71198	8.15667	7.87586	7.63736	7.55623	8.29632	7.94911	8.06604	7.87403	7.45685	7.01391	7.5852	8.70279	8.37241	7.18774
Nlrp6	NM_133946	2	5.64386	5.64386	5.64386	9.75448	9.52706	9.8332	9.6674	9.95808	9.54377	9.94731	9.06301	9.51725	9.80202	9.16668	9.33519	8.73385	9.69513	9.92423	9.9284	9.0045	8.80155	8.50965	8.58397	9.24201	8.0997	9.19834	9.15479	8.79221	7.88048	9.16532	10.3829	9.76801	7.6841
Nol4l	NM_001001986	2	5.83958	6.00079	5.80253	8.20731	7.54203	7.98498	7.94167	8.18032	8.06444	7.68435	8.13055	7.45403	8.22453	7.55172	7.70959	7.38034	7.86592	7.81446	8.01805	7.08309	7.15428	7.00694	7.58184	7.46895	6.44933	7.61897	7.51252	7.00414	6.22697	6.83609	8.03171	7.72515	6.77963
Noxa1	NM_172204	2	5.64386	5.64386	5.64386	10.0339	8.81449	9.62234	9.08485	10.2761	9.27062	10.061	9.42189	9.11119	10.1863	8.50765	8.72261	7.55617	9.24896	8.13135	9.35825	8.58953	8.29524	7.4262	8.83889	8.71923	8.21969	8.454	8.12306	7.14645	7.94817	7.68341	8.8926	8.65761	7.40715
Noxo1	NM_027988	2	6.21368	6.06268	6.19478	10.8669	10.6282	10.9347	10.8131	11.149	10.9053	10.7604	10.2593	10.656	11.1036	10.3316	10.7653	9.52495	10.9262	9.92423	10.5297	9.06339	8.98194	8.68143	9.62869	9.59401	8.92196	9.67371	9.42959	8.91661	9.04358	9.1568	10.4291	9.96587	8.39818
Npdc1	NM_008721	2	5.64386	5.64386	5.64386	9.28026	8.72635	9.20182	9.19701	9.36202	8.9776	8.81919	8.85481	8.98069	9.75405	8.90715	9.32591	7.68287	9.04507	8.17801	9.03329	8.26098	8.34002	8.08904	8.35062	7.89118	8.26821	8.78424	8.41445	7.88454	7.33034	7.86178	9.21056	8.27196	7.40715
Nr1d1	NM_145434	2	5.77724	5.86842	5.99012	8.60939	9.43119	8.92234	9.75458	8.2438	9.42352	8.16317	8.509	10.0712	9.46324	9.32016	9.03295	8.00736	8.70239	9.16822	9.2049	7.15704	7.15428	8.11748	7.17383	8.49673	8.6318	7.91696	9.00222	8.59668	7.01391	7.39541	8.03171	7.56456	7.0641
Nr1d2	NM_011584	2	6.06506	6.17903	5.89937	7.10673	8.56632	7.493	7.47832	6.97359	8.57005	7.78962	8.19194	8.50524	6.59556	7.41298	7.2421	7.62091	7.63602	7.48402	7.33106	7.83484	7.01391	7.12372	7.13975	7.49594	7.73565	8.025	8.70249	8.36398	7.65598	7.45222	7.56885	7.86964	7.59756
Nr1h4	NM_001163504	2	5.64386	5.64386	5.64386	9.09407	8.82396	8.68636	9.14632	9.29768	9.37857	8.79916	8.57961	8.58175	8.99787	8.59046	8.26008	7.68287	8.25207	8.30955	9.22563	8.00471	7.72644	7.20549	8.50585	8.37113	8.28403	8.68233	8.39229	7.955	7.85249	8.23001	9.30843	8.68717	7.0641
Nr1i2	NM_010936	2	5.64386	5.64386	5.64386	9.34531	9.62239	9.47347	9.59365	9.32141	9.31106	8.62804	8.85101	9.18253	9.14894	8.71381	9.01576	7.98294	9.20763	8.77174	9.03329	7.92227	7.50833	7.23175	7.81568	8.08143	7.07647	8.08613	7.98183	7.41995	6.82518	7.53347	9.01361	8.42012	7.0641
Nr2f2	NM_009697	2	5.64386	5.64386	5.64386	8.26729	8.42415	8.96992	8.48096	8.44085	8.4448	7.42157	8.13681	8.11684	8.48961	7.41298	7.46121	6.47362	7.52824	6.58616	7.89405	7.64225	7.72644	7.73238	7.72664	7.80745	9.02908	8.10595	8.40341	8.02219	6.96246	7.63514	7.26636	7.66701	7.6841
Nrarp	NM_025980	2	5.64386	5.79738	5.89937	7.71098	7.42247	8.07477	8.09207	8.3046	7.39411	7.66235	7.69455	7.65628	8.13748	7.64767	8.01671	6.99708	8.12464	6.95104	7.57671	7.92227	7.8137	8.03041	8.0355	7.62384	7.59056	7.96115	7.88994	7.59566	6.79608	8.03918	9.28239	8.80867	7.91635
Ociad2	NM_026950	2	5.64386	5.64386	5.64386	11.3722	10.9577	10.7948	10.8373	11.3542	10.8276	11.3288	11.4109	10.9255	11.2294	9.65634	10.1289	8.87325	10.3897	10.8654	11.2533	9.64186	9.58207	9.042	9.74094	10.1304	9.13753	10.0307	9.67875	8.89884	8.48342	8.50977	10.1532	9.62771	7.98614
Odc1	NM_013614	2	7.09996	7.55108	6.62116	9.47452	8.79536	9.09857	9.64323	9.27355	8.38039	9.89164	9.59322	9.02246	9.6943	8.47314	8.51797	9.49935	8.33118	10.017	9.40443	8.87899	9.40369	9.22959	9.03706	9.31961	8.41908	8.82067	9.19374	9.12582	9.9307	8.46905	8.40592	8.54375	8.49711
Oplah	NM_153122	2	5.77724	5.72266	5.89937	8.20731	8.16575	8.22939	8.07411	8.40797	8.18537	7.72738	7.87007	8.27882	7.65679	8.05008	8.13823	7.68287	8.34395	8.77174	7.81419	7.96408	7.48192	8.71904	8.53236	8.0635	7.86748	7.67311	8.03999	7.74234	8.81611	9.53771	8.56558	8.50001	8.94552
Optn	NM_181848	2	5.7121	5.64386	5.75154	7.75952	7.60929	7.42634	7.03391	7.89416	8.03898	7.54697	7.79293	7.15338	7.43136	6.94386	7.37392	7.22241	7.17497	7.87235	7.57671	7.53538	7.99267	7.35631	7.03239	7.02586	6.88234	7.96115	7.88994	7.62837	6.93603	7.55957	8.29743	7.96923	7.50549
Osbpl5	NM_024289	2	5.77724	5.64386	5.64386	7.52694	7.37172	7.3202	7.27316	7.36477	7.36368	6.99827	7.15569	7.23462	7.5258	8.00248	7.79271	6.78745	7.31128	6.83937	7.14773	6.53596	6.77386	6.9448	7.23967	6.94979	6.27034	7.37948	7.13953	7.11602	6.39163	7.55957	7.43343	6.9027	6.92887
Otud7b	NM_001025613	2	6.21368	6.00079	5.94544	8.08884	7.83211	7.83887	7.55804	7.98612	8.11403	7.47305	7.46513	7.90486	8.05542	7.41298	7.33747	6.94746	7.69702	8.35086	7.95738	7.00512	7.74875	7.71387	6.87555	7.74131	8.31515	8.10595	8.05417	7.48094	6.5741	7.53347	7.9678	7.9036	7.40715
Ovol1	NM_019935	2	5.64386	5.64386	5.64386	7.5684	7.17859	7.74627	7.33481	8.04432	7.27924	6.8888	7.31869	7.23462	8.40102	6.99339	7.30008	6.94746	7.23105	7.55644	7.56049	6.83531	6.58831	6.84627	6.79024	7.29541	5.82774	6.87838	6.51726	6.6478	5.99059	6.60502	8.05241	7.17719	6.42494
Pafah1b3	NM_008776	2	7.80971	7.36708	7.71986	10.6329	10.0711	10.7681	10.406	10.4094	10.3966	10.2536	10.282	10.3948	10.793	10.2525	10.7463	9.50794	10.7526	9.34218	10.1205	9.11996	8.73603	8.47709	9.49354	9.33465	9.93348	9.01136	9.37414	9.38706	9.13356	10.2607	10.712	10.1327	9.88878
Pakap	NM_001304544	2	5.64386	5.64386	5.64386	8.90743	8.8795	8.79603	9.17189	8.60455	9.29502	8.2689	8.20391	9.13254	8.73339	8.2053	8.19026	8.00736	7.88353	8.08314	8.54886	9.32639	9.49233	9.25542	8.54544	8.63673	9.20555	9.10296	9.16789	8.85805	7.53792	8.42714	8.77926	8.10681	7.91635
Palld	NM_001293772	2	5.77724	5.93612	5.75154	8.98092	8.3863	8.93438	8.93365	8.69816	8.47833	7.84927	8.41944	8.32407	9.16859	9.18811	8.91423	7.79933	8.85294	7.55644	8.49865	8.12015	8.35465	8.68143	8.51917	8.1846	7.73565	8.61478	8.82334	8.8018	7.44725	9.5956	9.40812	8.94541	8.83638
Paqr4	NM_023824	2	6.96664	6.76748	6.7305	10.1084	9.85262	10.4068	9.8891	10.0639	9.77141	9.78875	9.98183	9.67982	10.3175	9.66401	9.63835	8.70428	10.0971	10.3481	9.87692	8.50709	8.0296	7.88908	8.47884	8.4	7.53877	8.68233	8.71147	8.2068	7.82395	8.69775	9.64452	9.11448	8.11634
Parva	NM_020606	2	5.7121	5.64386	5.64386	9.54544	8.91537	9.2935	9.50926	9.45078	9.42352	8.67276	9.37236	8.98539	9.77022	9.04274	9.20467	7.82703	9.35371	8.57659	9.11888	8.12015	7.91586	7.93774	7.93971	8.11665	7.82486	8.69547	8.74682	8.3246	7.44725	8.81071	9.02935	8.47764	8.49711
Patj	NM_172696	2	5.64386	5.64386	5.64386	8.38025	8.28024	8.3331	8.3822	8.07257	8.54766	7.94353	8.13055	8.24785	8.31548	7.08764	7.70959	6.72991	7.86592	8.4301	8.23803	6.83531	6.93825	6.6264	7.17383	7.06243	6.79671	6.92376	6.84548	7.11602	6.76638	7.03519	7.69264	7.14915	6.20842
Pbld2	NM_026085	2	5.64386	5.64386	5.64386	7.72327	7.42247	7.77334	7.63358	7.95611	7.68413	7.06689	7.69455	7.42663	7.41501	6.6045	7.3918	6.16179	7.48276	6.83937	7.4937	6.92271	6.97657	7.0954	6.26621	7.29541	7.11236	7.27833	7.80862	7.44466	6.5741	7.36613	8.09292	7.74402	6.61316
Pcbd1	NM_025273	2	5.64386	5.64386	5.64386	9.29268	8.66445	8.96405	9.05768	9.06444	8.62668	8.67276	9.49921	8.94733	9.26757	8.11866	8.62769	7.13646	8.67232	8.30955	8.70462	7.78904	7.72644	7.73238	7.87903	8.71923	8.08171	8.16382	8.26395	7.69165	6.8537	7.96302	8.98699	8.24571	7.30162
Pcdh1	NM_029357	2	5.64386	5.64386	5.64386	8.88025	8.81449	8.4041	8.96324	8.80303	8.63943	8.39436	8.38305	8.61854	8.72014	7.73764	8.14879	7.04505	8.06418	8.08314	8.50714	8.15667	8.01126	8.42114	7.27149	8.15102	7.34126	8.08613	8.0959	7.62837	7.57265	7.53347	8.95437	8.52205	7.30162
Pcgf2	NM_009545	2	6.58516	6.17903	6.33987	7.93883	7.86916	8.17967	8.03749	8.38563	8.63943	7.84927	7.78498	7.95367	8.50515	7.84947	8.18	7.18007	8.77019	7.40777	7.33106	7.41995	6.89887	6.9127	6.99475	7.59915	7.37118	7.09218	7.49183	6.86467	6.50386	7.5069	8.65624	7.76265	6.92887
Pcmtd1	NM_183028	2	6.58516	6.9423	6.97229	8.52065	8.39903	8.10704	8.27619	8.12745	8.33928	8.43386	8.26803	8.51828	7.95716	7.48403	7.55943	7.55617	7.86592	6.95104	8.48151	8.32656	8.93405	8.68143	8.25834	8.2011	7.84632	8.7214	8.67522	8.90331	8.38915	8.12906	7.15597	7.85235	6.61316
Pcolce	NM_008788	2	5.83958	5.64386	5.69872	7.59539	7.54203	7.81301	7.53195	6.88081	6.41129	6.34232	7.39376	7.94404	8.33299	9.52774	8.67228	7.30353	8.25207	7.05469	6.98706	7.08309	6.93825	7.63736	6.69957	6.43981	7.53877	7.37948	7.72245	7.60665	5.93829	8.0016	8.10287	7.47703	7.91635
Pcsk5	NM_001190483	2	5.64386	5.64386	5.64386	7.48425	6.95553	7.30172	7.36468	7.5964	6.85227	7.6173	8.00618	7.34117	7.67064	6.47099	6.66857	5.97629	6.74517	8.88856	8.21748	7.53538	7.83472	7.57719	7.47655	7.46895	6.60854	8.14478	7.95184	7.19093	6.96246	7.39541	8.72229	8.1499	6.61316
Pcsk9	NM_153565	2	5.64386	5.64386	5.64386	7.89605	6.69158	6.56586	7.50538	7.16938	6.90957	7.03299	6.57099	6.19158	8.13748	7.64767	8.289	6.94746	8.21084	6.58616	6.75011	7.15704	6.72966	6.16364	7.42088	6.26251	6.96315	7.34655	7.33805	6.34078	6.18269	7.1768	8.80387	7.74402	7.76574
Pde5a	NM_153422	2	6.30489	6.38688	6.40728	8.76609	8.10491	8.58305	8.54757	8.62376	8.70968	8.54628	8.5234	8.5312	8.74653	7.84947	7.70959	6.94746	8.01711	7.81446	8.45543	7.96408	8.21735	7.9536	7.47655	8.21741	7.66493	8.4846	8.51014	8.3246	7.13504	8.14638	8.68964	8.34794	7.59756
Pdgfa	NM_008808	2	5.7121	5.79738	5.69872	9.89147	10.0185	9.97112	9.7261	10.1917	9.90598	9.72116	9.89774	9.9198	9.86359	10.136	10.1449	10.3326	10.1849	10.3783	9.93471	9.38912	8.7582	9.53916	9.7635	9.57515	8.34562	9.56337	9.46717	8.82551	10.5189	9.20719	9.67486	9.44947	8.49711
Pdia5	NM_028295	2	6.43172	6.38688	6.37398	9.33334	8.52047	8.37788	8.69591	8.85274	8.39049	9.42044	8.49932	8.41052	9.47906	8.71381	8.89554	7.38034	8.98926	7.75415	8.74107	8.44938	7.60935	7.61758	7.79393	7.02586	6.75193	8.1826	7.92122	7.58459	7.33034	7.4241	8.67637	8.32305	7.40715
Pdzd3	NM_133226	2	6.11632	5.72266	6.07549	7.69858	7.49539	8.12817	7.53195	7.9099	7.94618	7.49811	7.16796	7.46754	7.81478	7.44894	7.54351	6.54209	7.65664	7.87235	7.68545	6.42058	6.48575	7.44876	6.69957	7.26435	6.13734	7.31284	7.19178	7.36925	6.46741	7.10773	8.34852	7.6269	5.95359
Perp	NM_022032	2	5.64386	5.64386	5.64386	11.4757	10.9052	11.0416	11.4558	11.7997	12.0062	11.1934	11.1834	10.656	11.4452	10.491	10.6039	9.47329	10.7138	11.0334	11.6376	9.78869	9.31673	8.9501	9.59135	9.64917	8.85999	10.1969	9.44581	8.88085	8.639	9.11342	10.7787	9.79541	7.6841
Pex11g	NM_026951	2	6.06506	5.86842	6.19478	8.11705	7.63103	8.35118	7.98076	8.35146	8.05811	7.59424	8.013	7.82317	8.28879	7.44894	7.94584	7.18007	7.77454	7.75415	7.62432	6.74225	6.58831	6.45866	7.17383	6.6467	6.7057	7.34655	7.29092	7.20546	6.79608	7.03519	7.85455	7.56456	7.40715
Pgpep1	NM_023217	2	6.69039	6.2867	6.53336	7.98039	7.5648	8.26797	7.98076	8.26843	7.82483	7.49811	7.65149	7.48092	8.42573	8.09616	8.20044	8.21033	8.36916	7.242	7.75838	6.92271	6.97657	7.12372	7.93971	6.98832	6.33251	7.82431	7.64959	7.3432	7.55539	7.61039	8.5143	7.78104	7.50549
Phgr1	NM_001145644	2	5.7121	5.64386	5.69872	14.1641	14.2953	14.4994	14.5103	14.9179	14.3464	13.7557	14.9762	14.4934	14.2528	13.5888	13.5075	12.3257	13.8158	14.071	13.9083	11.5691	11.1244	11.2242	11.9027	12.2952	12.6754	12.2097	12.4494	11.9129	11.1591	12.0031	12.9354	12.4097	10.8595
Phlda1	NM_009344	2	6.93843	7.09821	6.40728	10.8683	9.94229	11.2046	10.6162	10.453	9.97974	9.77343	9.67934	9.95138	10.8212	10.6882	10.8059	10.6048	10.3171	11.435	11.1378	9.15648	9.1253	9.13537	9.27545	9.29677	8.11746	9.58471	9.25642	9.28132	8.75694	9.41443	9.8237	9.39081	9.2871
Phldb1	NM_153537	2	6.43172	5.93612	5.99012	9.42271	9.28802	9.5808	9.43379	9.64668	9.52556	8.85843	9.10191	9.03159	9.45126	9.34899	9.2495	8.57953	9.43951	9.70281	8.95478	8.56257	8.11798	8.50965	8.65808	8.78638	8.39014	8.4846	9.03119	8.29094	7.0878	8.68595	9.35913	8.69689	8.39818
Pigp	NM_001159617	2	6.5483	6.33766	6.26915	8.52767	8.52047	8.67205	8.12734	8.37433	8.74946	8.31194	8.51861	8.55037	8.10725	8.40155	8.2206	7.62091	8.41829	7.87235	8.47287	8.08269	7.79238	7.67612	7.607	7.91137	7.51216	8.30766	8.23934	8.2068	8.06255	8.07581	8.28874	8.09216	7.18774
Pigr	NM_011082	2	5.64386	5.86842	5.69872	14.5927	14.2771	14.4822	14.0335	14.5451	14.5564	14.777	14.0038	14.1246	14.2018	14.2107	14.2924	13.3211	14.3748	14.528	14.6947	13.7147	13.545	13.0445	12.933	13.6767	11.7632	13.8918	13.2734	12.7304	12.0985	13.2763	13.7858	13.8764	13.44
Pik3c2b	NM_001099276	2	5.7121	5.86842	5.64386	7.69858	7.83211	7.74627	7.45073	7.43171	7.63401	7.74843	7.18013	7.4404	6.93083	6.99339	7.1817	6.32612	7.45948	7.6254	7.3118	7.22739	6.97657	7.12372	7.20712	6.43981	6.39209	7.50419	7.13953	6.75043	6.22697	6.83609	7.59729	7.38384	6.20842
Pip5k1b	NM_008846	2	5.7121	5.72266	5.89937	8.66141	8.57756	8.65759	8.67222	9.04318	8.92299	8.36741	8.12426	8.19199	8.70002	7.84947	8.40802	7.22241	8.21084	7.6254	8.50714	7.69287	7.31247	7.06651	8.14264	7.52245	7.75848	7.98275	7.33805	7.30324	6.98841	6.91905	8.62204	7.76265	7.18774
Pklr	NM_001099779	2	5.64386	5.64386	5.64386	7.75952	7.37172	7.81301	7.79583	7.34175	7.49116	7.03299	6.94362	7.26587	7.86381	7.08764	7.51115	6.72991	7.33706	7.55644	7.57671	7.08309	7.01391	6.41349	6.38735	6.86949	5.64386	7.20672	6.70873	6.77012	6.39163	6.60502	7.86628	6.96837	6.42494
Pkp2	NM_026163	2	5.64386	5.64386	5.64386	8.616	8.08929	8.12817	8.07411	8.7251	8.74553	8.52205	8.43475	7.84403	8.75954	7.25947	7.8713	6.66998	7.8481	7.32727	8.74825	8.04422	7.63354	7.0954	7.20712	7.38479	6.79671	7.96115	7.79179	7.36925	7.11162	7.47982	8.25343	7.9036	6.42494
Pla2g16	NM_139269	2	7.62737	6.8749	7.78468	9.95537	9.71181	9.64816	9.76021	10.1459	9.53013	9.92437	9.88292	9.7057	10.1983	9.92241	9.97135	8.9382	9.72473	9.04777	9.39532	9.49273	9.64886	9.50727	10.345	9.69648	9.71752	9.93972	9.50895	9.60269	9.68303	10.0832	10.0694	9.84433	9.65166
Plac9a	NM_207229	2	5.64386	5.64386	5.69872	7.55471	7.60929	8.09637	8.03749	7.69053	8.11403	7.31275	8.48957	8.44507	8.27978	7.70827	7.2421	6.16179	6.95952	7.15138	7.2725	6.42058	7.45502	7.47098	6.69957	7.29541	7.66493	7.20672	7.63079	7.40745	6.70509	6.55401	6.42479	5.79629	5.95359
Plac9b	NM_001270503	2	5.64386	5.64386	5.69872	7.69858	7.92302	8.24881	8.2604	7.92547	8.23666	7.54697	8.66435	8.65441	8.58775	7.92801	7.62138	6.24629	7.08654	7.242	7.40562	6.74225	7.55972	7.75065	6.91639	7.38479	7.90887	7.56272	7.95184	7.61755	6.9091	6.65429	6.45618	5.93414	5.95359
Plcb3	NM_001290349	2	7.69637	7.06835	7.63802	9.305	8.93298	9.65909	9.29333	9.19864	9.3811	8.58189	8.32942	8.31663	9.56312	8.82744	9.2495	8.1011	8.99737	9.7955	8.85187	8.22704	8.29524	8.40969	9.19476	8.94173	7.51216	8.87942	8.56069	8.11745	7.98732	8.85352	9.87397	9.27231	8.39818
Plce1	NM_019588	2	5.64386	5.64386	5.64386	8.32487	7.94054	8.28688	8.32259	8.05852	7.77944	7.84927	7.99245	7.99156	8.21512	6.89256	7.42693	6.89607	7.59386	7.48402	8.15402	6.53596	6.89887	7.15149	6.87555	6.73998	7.27948	7.37948	7.42792	6.86467	6.88166	6.74805	7.62518	7.06159	6.20842
Plch2	NM_175556	2	5.64386	5.64386	5.64386	8.20731	7.83211	8.36014	8.05592	8.01552	8.03255	7.5708	7.42478	8.0996	8.03416	8.02648	8.20044	7.04505	8.16839	6.58616	7.80044	7.08309	6.58831	6.21719	6.99475	7.32583	6.7057	6.73304	7.13953	6.9361	6.43002	7.33625	8.31466	7.7992	5.95359
Plek2	NM_013738	2	5.64386	5.64386	5.64386	9.25509	8.87039	8.99888	9.34668	9.40153	9.29233	8.91537	9.44729	8.60638	9.34301	8.07331	8.46827	7.22241	8.7607	8.70958	9.57566	8.04422	7.39968	6.9762	7.17383	7.80745	6.92332	7.89435	7.68648	7.00414	6.64108	7.39541	8.31466	8.1499	6.61316
Plekha6	NM_182930	2	5.77724	5.64386	5.75154	10.3415	9.90263	10.4367	10.3988	10.1359	10.083	9.63903	9.63582	10.0444	10.2931	9.63308	9.9832	8.61175	10.1046	9.32154	9.96892	8.50709	8.24901	8.18623	8.35062	8.76434	7.90887	8.85621	8.79828	8.0466	7.13504	8.57519	9.37153	8.87866	7.76574
Plekha7	NM_001305185	2	5.64386	5.64386	5.69872	7.97011	7.58722	7.78668	8.07411	8.16729	7.96657	7.82966	7.45515	7.5587	8.16708	6.6669	7.33747	6.84278	7.43581	8.39102	8.22779	7.08309	7.05031	6.74052	7.36297	6.98832	7.18155	7.01042	6.90927	6.82759	6.08984	6.79274	7.71876	7.30977	7.0641
Plekhh1	NM_181073	2	5.64386	5.64386	5.64386	8.60276	8.37346	8.53641	8.67222	8.11392	8.62668	8.2689	8.3883	8.5312	8.65894	7.41298	7.65138	6.78745	8.04866	8.64462	8.39266	7.47883	6.77386	6.81188	7.44898	7.78574	7.14737	7.27833	7.36105	6.84626	6.88166	6.70192	7.49518	7.17719	6.77963
Plpp2	NM_001302442	2	7.87069	8.1729	8.10202	11.085	10.9096	11.3443	11.2351	11.2027	11.3873	10.417	10.7646	10.7748	11.1661	10.546	10.7992	9.64655	10.9026	10.5654	11.0519	9.66739	9.38955	8.7557	9.31417	9.54961	9.13753	10.0045	9.8099	9.54389	8.74937	9.57656	10.9892	10.4865	8.23576
Pls1	NM_001033210	2	5.64386	5.72266	5.69872	9.68392	8.97609	8.51251	9.14632	9.78539	9.65476	9.40064	8.82412	8.59412	9.41058	8.30676	8.50159	7.98294	8.69243	9.25782	9.88671	8.71727	9.01914	7.98482	8.36544	8.42831	7.94911	9.21669	8.21429	8.56886	7.37037	8.27795	9.4671	9.21935	7.98614
Plxna2	NM_008882	2	5.64386	5.64386	5.64386	8.04055	7.65244	7.70468	8.05592	8.05852	8.03898	7.47305	7.92896	7.802	7.95716	7.13256	7.3189	6.89607	7.61509	7.55644	7.98196	8.32656	8.35465	8.30228	7.607	7.78574	8.48898	8.00402	8.08212	7.87548	7.71935	7.94333	8.30608	7.72515	7.0641
Pm20d1	NM_178079	2	5.64386	5.64386	5.64386	7.33208	7.5189	7.6326	7.68183	7.5964	7.36368	7.28422	7.19219	7.03136	7.33031	7.92801	8.05088	6.94746	8.36916	7.05469	7.10362	6.64279	6.77386	6.45866	6.13393	6.43981	5.9116	6.57139	6.63516	6.41765	6.39163	7.39541	8.33169	7.92029	6.61316
Pon3	NM_173006	2	6.21368	6.38688	6.23243	8.693	8.49699	8.09637	8.57338	8.44085	8.23666	8.35374	7.73635	8.20817	8.60227	7.64767	7.95789	7.95809	8.26556	8.03326	8.80444	7.58981	7.8137	7.03703	7.13975	7.38479	7.61578	7.31284	7.47084	7.81045	7.55539	7.96302	7.59729	7.60642	7.6841
Ppa1	NM_026438	2	7.43887	7.78938	7.25448	11.7114	11.1712	11.275	11.6226	11.4366	11.4634	11.3565	11.2052	11.2545	11.7467	10.7828	11.4404	9.97843	11.3766	10.3067	11.2072	9.99434	9.88379	9.13537	9.59764	9.46333	8.98137	10.2424	9.96055	9.49447	8.69524	9.87038	10.8719	10.4088	9.11086
Ppara	NM_001113418	2	5.64386	5.64386	5.64386	7.67346	7.37172	7.78668	7.50538	7.65361	7.24626	7.84927	8.15542	7.06728	7.81478	6.47099	6.63893	6.60745	7.11662	8.08314	7.67041	7.00512	7.18733	7.00694	7.30263	7.67198	7.03969	7.01042	7.99659	7.49282	6.8537	7.47982	7.87792	7.7992	6.42494
Ppargc1b	NM_133249	2	6.51049	6.65142	6.50286	8.99112	9.03435	9.48988	9.03928	8.92423	8.94028	9.21657	8.56111	9.08951	8.90134	8.60647	8.55812	8.21033	8.97291	9.81038	8.98548	8.12015	8.13503	7.40328	8.42326	8.00832	7.42924	7.87138	7.47084	7.60665	7.60656	8.11153	8.42984	8.07736	8.11634
Ppp1r14d	NM_028104	2	5.64386	5.64386	5.64386	10.9345	10.7891	10.8063	10.8998	11.256	10.7024	10.6247	10.4154	10.5694	10.8305	9.64088	9.9832	9.01247	10.0743	10.3067	10.9118	9.06339	8.98194	8.95798	9.00901	9.45647	8.79524	10.1064	9.391	9.21107	8.43706	9.26385	10.5043	9.96988	8.49711
Ppp1r1b	NM_144828	2	5.64386	5.64386	5.64386	12.0186	11.3473	12.0646	12.1922	11.8708	11.7631	11.235	11.4459	11.7644	12.3009	11.3729	11.8173	10.0798	11.9118	10.3683	11.1157	10.7109	9.95271	9.61094	10.0192	10.9397	10.3338	10.431	11.2507	10.3155	9.52797	10.7026	12.3196	11.6456	9.56309
Prdx1	NM_011034	2	9.61432	9.97611	9.05126	10.5017	9.84334	9.0661	10.2143	10.3843	10.6265	10.4071	10.0397	9.89752	9.7078	8.60647	8.69407	9.41059	10.0472	9.02243	10.7971	10.1473	10.1289	9.66011	9.9764	9.75353	9.55102	10.7784	10.1072	9.83297	9.30343	10.5417	10.472	11.0017	9.81399
Prelid2	NM_029942	2	5.7121	5.79738	5.80253	8.08884	7.85075	8.28688	8.32259	8.21874	7.91154	8.06593	8.20391	8.06447	8.33299	7.70827	7.99347	7.22241	8.04866	8.22321	7.99409	6.74225	7.21965	6.84627	7.30263	7.06243	7.07647	7.01042	7.64959	6.86467	6.73606	7.36613	7.97865	8.16399	6.77963
Prelp	NM_054077	2	5.64386	5.64386	5.64386	7.7714	7.34567	8.19977	7.86014	7.31834	6.95111	7.16406	7.51402	8.15907	8.76601	9.17743	8.26008	6.66998	7.7363	6.58616	7.36882	7.22739	7.53425	7.57719	7.30263	7.74131	6.65794	7.77565	7.26677	7.48094	7.06359	7.36613	7.69264	7.47703	7.59756
Prkar2a	NM_008924	2	7.3345	7.39141	7.74614	9.03121	8.91537	10.2078	8.63595	8.85274	8.81466	8.80921	9.03982	8.49209	9.4986	8.71381	8.58169	8.07823	8.73184	8.64462	8.53231	8.26098	8.15187	8.17274	9.11806	8.84004	7.90887	8.70849	8.56069	8.09421	7.6397	8.48275	8.79776	8.75387	7.18774
Prkca	NM_011101	2	5.64386	5.86842	5.69872	9.14521	8.13565	9.0103	8.75349	9.02161	8.75728	8.86808	8.66435	8.43823	9.20234	8.41978	8.33595	7.68287	8.46581	8.39102	8.94855	8.35826	7.99267	7.71387	8.64599	8.76434	7.34126	8.80863	8.54068	8.14031	8.22419	8.5231	9.10558	9.0628	7.6841
Prkcz	NM_008860	2	5.64386	5.64386	5.64386	8.23332	8.32093	8.36903	8.21193	8.35146	8.48777	8.09907	8.40395	8.22418	8.27978	7.21839	7.55943	6.40175	7.52824	8.22321	8.06481	6.92271	6.72966	7.06651	7.13975	7.62384	6.79671	7.64629	7.72245	7.11602	6.60798	6.83609	7.85455	7.43119	6.61316
Prnp	NM_001278256	2	5.64386	5.79738	5.75154	8.89118	7.63103	8.79603	8.45342	9.15967	8.5111	8.61664	9.43464	8.5312	9.29911	8.57428	8.53417	7.65222	8.47745	8.67747	8.83174	8.41964	8.21735	8.40969	7.87903	7.93129	8.64411	8.78424	8.88017	8.38965	7.5897	8.02051	8.22637	7.85235	7.84301
Prom1	NM_008935	2	5.64386	5.64386	5.64386	9.63922	8.41164	8.97576	8.70761	9.63252	9.47425	9.41387	9.85473	8.84239	9.20234	7.67829	7.70959	7.26354	8.04866	9.99108	10.3806	8.50709	8.69064	7.98482	8.67007	9.01821	7.24757	8.64219	8.33536	7.59566	7.94817	7.84066	8.44557	8.64763	6.61316
Prr15	NM_030024	2	5.64386	5.64386	5.64386	7.45507	8.16575	7.57222	7.47832	7.31834	8.22541	7.94353	7.41452	7.67968	7.29498	7.04129	6.88607	6.84278	7.02442	6.83937	7.70033	7.29448	7.15428	7.20549	6.79024	7.23259	6.65794	7.53375	7.13953	7.46894	6.82518	6.38917	6.99429	6.9027	5.95359
Prr15l	NM_146026	2	5.7121	5.64386	5.69872	10.9979	11.2715	11.6272	11.2188	11.2249	11.2643	10.8556	11.017	11.0463	11.2777	10.4693	10.5251	9.54177	10.7333	11.8278	10.959	9.65468	8.99133	8.35101	9.35929	9.82978	9.10228	9.57052	9.16789	8.98557	8.82334	8.93552	10.2164	9.83115	8.34604
Prrg2	NM_022999	2	7.76222	7.67514	7.71986	9.57964	9.43119	9.8332	9.48907	9.6929	9.16575	9.35335	9.53756	9.25831	9.82387	9.44114	9.70067	8.83282	9.64441	9.8397	9.74315	8.64199	8.48	8.61316	8.59659	8.76434	8.29968	8.69547	8.68437	8.64544	7.88048	8.64997	9.45937	9.11448	8.63385
Prss30	NM_013921	2	5.64386	5.79738	5.69872	9.55579	9.90709	9.77412	9.44781	10.613	9.87933	9.17054	9.55635	9.1452	9.78621	9.55275	9.01576	8.57953	8.82588	9.82511	10.5889	8.29414	7.65733	7.40328	7.95938	7.29541	6.75193	8.74686	7.63079	7.56219	8.29869	8.18041	8.50682	8.32305	7.59756
Prss32	NM_027220	2	5.64386	5.64386	5.69872	12.8457	12.8508	13.1984	12.8403	13.0146	12.9753	12.2387	12.5307	12.7141	12.995	11.9867	12.1745	10.5887	12.0478	12.4219	12.7346	10.2353	9.79543	9.68882	10.2524	10.6879	10.3526	10.6493	10.6759	10.1842	9.36417	10.1055	11.242	10.4837	8.39818
Prss8	NM_133351	2	5.64386	5.72266	5.64386	8.86369	8.67495	8.73537	8.64814	8.67992	8.69346	8.39436	8.509	8.36072	9.07798	8.26703	8.70841	7.74227	9.20763	6.27888	8.17548	7.15704	7.18733	6.21719	7.30263	7.57403	6.88234	7.16953	7.68648	6.5601	6.08984	7.24271	8.58701	7.83485	6.92887
Ptgfrn	NM_011197	2	6.0119	5.93612	6.53336	8.76014	8.33424	8.48001	8.68412	8.59484	8.76894	8.38095	8.29626	8.08214	8.67963	8.54134	8.68684	7.52268	8.48899	7.15138	8.46417	8.12015	7.50833	7.17874	7.30263	7.35561	7.80307	8.20114	7.87403	7.43236	6.79608	7.65948	8.65624	8.42012	6.77963
Ptprd	NM_011211	2	5.64386	5.64386	5.64386	8.73001	8.29393	8.46348	8.91359	8.93965	9.08099	8.98794	8.69011	8.49209	9.01967	8.22617	8.24048	7.13646	8.56732	7.55644	8.7906	7.41995	6.77386	7.06651	7.44898	8.0635	6.88234	7.75069	7.44954	7.33001	6.88166	8.1635	8.18011	8.2589	6.92887
Ptprf	NM_011213	2	5.7121	5.64386	5.64386	11.6492	11.2471	11.9537	11.3755	11.5249	11.4568	10.8749	11.0254	11.0041	11.4917	10.7435	10.7253	9.61511	11.1644	10.7466	11.1662	9.72931	9.26347	9.09302	9.9021	10.3123	9.32504	10.1113	9.75017	9.45854	8.6714	9.63295	11.0184	10.5442	7.76574
Ptprh	NM_207270	2	5.64386	5.64386	5.69872	8.50649	8.25245	8.4882	8.41112	9.25518	8.66462	8.2689	8.28503	8.16737	8.57308	8.07331	8.00514	7.55617	7.96846	10.4749	9.23077	7.53538	7.31247	6.74052	7.13975	7.20013	5.99084	8.04566	7.19178	7.11602	6.50386	7.27457	8.52174	8.0624	6.61316
Ptprk	NM_008983	2	5.64386	5.64386	5.69872	9.16786	8.42415	8.65031	8.85166	8.67992	9.03988	8.32601	8.27372	8.52475	8.98129	8.38309	8.52609	7.71287	8.73184	8.17801	8.78362	8.04422	7.91586	7.23175	7.72664	8.28088	8.25222	8.14478	8.12306	7.90248	6.88166	7.92338	8.82807	8.29773	7.18774
Rab13	NM_026677	2	6.58516	6.12203	6.19478	7.92826	7.77467	8.13862	8.12734	8.40797	7.70855	7.70603	7.703	8.01014	8.28879	8.5579	8.75752	8.07823	8.70239	7.48402	7.71506	7.87922	8.01126	8.27729	8.1078	7.29541	7.59056	8.025	8.23934	7.96358	7.73476	8.58792	8.66298	8.24571	8.29195
Rab17	NM_008998	2	5.64386	5.64386	5.64386	7.46973	7.5189	7.78668	7.17543	8.14086	8.25887	7.42157	7.18013	7.3987	7.49501	7.13256	7.16099	5.97629	6.85633	8.35086	7.65521	7.74176	7.48192	7.61758	7.8371	8.13394	7.86748	8.20114	8.02567	7.51632	6.93603	7.33625	8.91537	8.27196	6.42494
Rab25	NM_016899	2	5.77724	5.64386	5.64386	11.4389	11.4609	11.7877	11.5367	11.6008	11.2289	10.3078	11.1225	11.5699	11.6643	10.914	11.3734	9.78011	11.5478	9.8966	10.9118	9.06339	8.78004	8.54149	9.03706	9.75353	9.22206	9.33895	9.59877	9.15605	8.43706	9.7107	10.8689	10.3789	8.91005
Rab4a	NM_009003	2	5.64386	5.72266	5.64386	7.59539	7.92302	7.826	7.45073	8.14086	8.10179	7.49811	7.56131	7.49418	8.00166	7.58442	7.69526	6.84278	7.59386	7.32727	7.54408	7.15704	6.89887	6.9762	7.03239	7.09812	6.75193	7.37948	7.29092	7.00414	6.88166	7.24271	8.05241	7.40771	6.42494
Rap1gap	NM_001081155	2	6.11632	6.12203	6.11636	8.92349	8.42415	8.72847	8.91359	8.51476	8.34448	8.47232	8.34572	8.67202	9.08317	8.41978	8.59719	7.48839	8.50044	6.71832	7.85468	7.00512	6.58831	7.0954	7.17383	7.41339	6.84016	7.09218	7.38368	7.10056	6.9091	7.24271	8.72873	8.0624	7.6841
Rbfox2	NM_001110829	2	5.64386	5.64386	5.64386	7.21513	7.69435	7.88924	7.42262	7.34175	7.61691	6.81092	7.62502	7.29647	7.83951	7.87613	7.42693	6.32612	7.55045	7.48402	7.10362	7.08309	6.93825	7.20549	7.10484	7.57403	7.94911	7.67311	7.68648	7.33001	6.73606	7.84066	7.87792	7.45429	6.77963
Reep6	NM_001204931	2	5.64386	5.64386	5.64386	8.06006	8.02506	8.26797	8.09207	8.58507	7.92549	7.59424	8.07297	8.40351	7.91124	7.08764	7.44417	6.84278	8.12464	7.55644	7.42367	8.04422	8.49328	7.82153	7.5036	8.51004	7.86748	8.7214	8.896	8.41487	7.26813	7.68341	9.49003	8.59663	6.77963
Reg4	NM_026328	2	5.64386	5.64386	5.64386	10.0315	10.2112	10.2685	10.2627	11.3911	10.0752	10.4104	11.0613	11.3641	11.1782	12.4034	13.2506	10.9295	13.0407	7.15138	9.70676	7.35858	7.34214	7.30777	7.06907	7.93129	9.44948	7.69943	7.55303	7.57344	8.11061	8.46905	10.788	10.6851	8.23576
Rflnb	NM_029658	2	9.35097	9.54329	9.37128	10.6919	10.4592	11.1333	10.8077	10.7657	11.0485	10.3938	10.7184	10.4705	10.793	9.90957	9.87609	8.80523	10.3989	10.5389	10.5788	9.98422	10.6484	10.5589	10.1491	9.46333	10.0766	10.5942	10.6481	10.3105	8.21323	10.1491	10.3519	10.0817	9.31449
Rhbdf1	NM_010117	2	6.06506	6.17903	6.03345	7.90687	7.58722	8.21958	7.77374	8.18032	8.61811	7.72738	7.62502	7.59607	8.16708	7.9023	8.15927	7.5889	7.8481	7.32727	7.80044	7.58981	7.58475	7.63736	8.17665	7.35561	7.90887	7.37948	7.77476	7.955	7.28917	8.11153	8.03171	7.9036	7.30162
Rhoc	NM_001291859	2	5.7121	5.64386	5.64386	10.0065	10.3971	10.2804	10.0586	10.6834	10.3299	9.66693	9.82403	10.0467	10.3609	10.607	10.1916	9.27635	9.88624	11.6571	10.5463	9.1744	9.27889	9.34233	9.62869	8.68445	9.24649	9.38022	9.36279	9.20385	8.0379	9.46363	9.96682	9.0092	9.51668
Rhpn2	NM_027897	2	5.64386	5.64386	5.64386	8.9603	8.555	8.81569	8.95344	8.93196	9.03988	8.53422	8.36717	8.23211	8.84139	8.38309	8.44275	7.52268	8.54537	8.54134	9.03329	7.83484	7.50833	7.28287	6.99475	7.84992	6.79671	7.82431	7.63079	7.27598	6.73606	7.27457	8.57276	8.29773	7.30162
Rida	NM_008287	2	6.16583	6.33766	6.19478	8.2247	8.32093	7.22536	8.21193	8.28059	8.11403	7.97957	7.92896	8.17562	7.78962	7.33826	7.47805	7.41726	8.10976	7.69121	7.91972	7.74176	7.74875	7.23175	7.13975	7.64811	6.7057	7.37948	7.66815	7.08494	7.55539	7.65948	7.62518	7.81713	6.92887
Rnf128	NM_023270	2	5.89934	5.86842	6.15609	10.3395	9.67042	9.28881	9.59365	9.95808	10.5676	10.4004	9.48211	9.44057	9.22128	8.63796	9.02725	8.44297	9.42155	9.36252	10.4592	9.52101	9.43843	8.54149	8.42326	9.27355	8.25222	9.86028	9.18088	8.91219	8.24587	9.18222	9.99915	10.0249	7.91635
Rnf152	NM_178779	2	5.64386	5.64386	5.69872	7.94933	7.79407	8.08561	7.63358	7.79594	8.22541	8.04907	7.60711	8.01933	7.73794	7.44894	7.37392	6.47362	7.59386	7.6254	7.95738	7.92227	7.68073	7.47098	7.33311	7.59915	7.68889	8.32467	8.08212	8.02219	7.42841	8.19713	7.75708	8.01657	6.92887
Rnf186	NM_025786	2	5.64386	5.64386	5.64386	10.1131	9.55006	9.81052	9.88395	9.70648	9.77527	9.78875	9.85283	10.1487	10.6093	10.0566	10.3691	8.59573	10.3742	8.86023	9.60364	8.15667	8.26458	7.82153	8.01685	8.79728	9.00064	8.58685	8.81503	7.64977	7.85249	8.70945	9.59249	9.40273	7.76574
Rnf43	NM_172448	2	5.95673	5.79738	5.64386	7.41017	7.44719	6.8965	7.70536	7.06077	7.5554	7.22539	6.94362	7.34117	7.22164	6.78414	7.11865	6.40175	7.05581	5.64386	7.08105	7.41995	6.85839	6.74052	6.87555	7.64811	6.13734	6.92376	7.16589	6.34078	6.60798	7.03519	7.73164	7.35957	6.92887
Rorc	NM_011281	2	5.64386	5.64386	5.64386	7.58196	7.69435	7.33844	7.63358	7.63479	8.29158	7.28422	7.88502	7.08493	7.22164	6.83937	6.75403	6.40175	7.11662	7.15138	7.77254	6.83531	6.77386	6.74052	6.4443	6.69409	5.64386	7.05187	6.84548	6.41765	5.99059	7.03519	7.19372	6.93591	7.18774
Rph3al	NM_029548	2	5.64386	5.64386	5.64386	7.49862	6.92065	7.3202	6.65323	7.82942	7.31148	7.70603	7.67747	7.50731	7.49501	6.78414	7.1817	6.78745	7.41175	6.44069	6.98706	6.64279	6.97657	6.6264	7.03239	7.41339	5.82774	6.87838	6.84548	6.28714	6.67344	6.70192	7.41757	7.23169	6.42494
Rpl22l1	NM_026517	2	7.47859	8.10097	6.90392	9.77233	10.1821	9.4858	9.30877	9.47214	10.211	10.1106	10.1288	10.2083	8.60227	9.12283	9.56143	9.24589	9.59718	8.64462	9.93156	10.1106	9.52503	9.50188	8.65808	9.87161	8.55566	9.90621	9.57929	9.38067	9.9307	9.63908	9.66817	9.87889	9.14176
Rpl39	NM_026055	2	10.053	9.98812	9.36706	11.2743	11.9053	11.662	10.6285	10.27	11.7684	11.5275	11.644	11.8299	10.4418	11.6235	12.0887	11.5876	12.0517	10.0041	11.1888	11.2353	10.8657	10.8889	10.2037	11.0371	8.78416	11.21	11.2797	10.9956	11.0339	11.5486	11.3209	11.7261	11.0344
Rras2	NM_025846	2	6.30489	6.43448	6.33987	8.34091	7.5189	7.14473	8.14466	8.49403	8.46883	7.96167	7.74457	7.85435	8.03416	7.37611	7.70959	7.65222	7.90092	6.58616	7.94493	7.41995	7.28219	6.84627	6.79024	7.29541	6.7057	7.64629	7.26677	7.08494	6.8537	7.45222	8.0829	7.52146	7.18774
Rtkn	NM_001136227	2	5.77724	5.79738	5.75154	8.74214	8.0735	8.30555	8.1954	8.51476	8.43508	8.16317	8.3883	8.61854	8.70002	7.76642	8.34516	7.45326	8.77019	6.95104	7.82781	7.87922	7.72644	7.51441	7.42088	8.59988	7.92913	8.1826	8.39229	7.86637	7.40932	8.1635	9.55672	8.52205	7.76574
Ryk	NM_013649	2	5.64386	5.64386	5.75154	8.97579	8.62166	8.85424	8.45342	8.98493	9.00743	8.57012	8.58419	8.48546	9.19278	8.40155	8.85744	7.18007	8.41829	7.87235	8.39266	8.26098	8.6674	8.06002	8.46515	8.95151	8.55566	8.65569	8.82334	8.60218	7.3505	8.66206	9.21516	8.74452	7.6841
S100a16	NM_026416	2	5.64386	5.64386	5.64386	11.6256	11.9098	12.1842	11.8012	11.6671	11.5893	10.9335	10.9546	11.3496	12.2858	11.5997	12.1339	10.3895	11.8989	10.9685	11.2709	9.29397	8.9534	9.35434	9.29106	9.20976	9.67015	9.92306	10.1994	9.4029	8.71091	9.50451	10.4816	9.94563	8.83638
S100g	NM_009789	2	5.64386	5.64386	5.64386	7.02966	7.83211	9.3841	6.32896	9.15307	7.77173	10.6668	6.45557	7.34117	7.31276	6.72671	6.4808	6.16179	6.92593	6.71832	8.00612	7.69287	6.58831	6.36686	7.42088	6.54696	7.48504	7.41169	6.67241	6.73049	7.93489	6.2678	6.45618	6.42993	6.20842
Sbf2	NM_177324	2	6.39067	6.23387	6.30495	8.23332	7.95784	8.22939	8.43946	8.0009	8.69753	8.23947	7.75274	8.02848	8.46599	8.74307	8.41678	8.62758	8.48899	8.26703	8.14316	8.29414	7.97385	7.9217	8.38011	7.91137	7.78095	8.21945	8.20161	7.9721	7.93489	8.33949	8.66969	8.1499	7.59756
Scamp5	NM_001301635	2	5.83958	5.72266	5.75154	9.00124	8.80496	8.93438	9.14632	9.17278	8.99756	8.91537	8.79671	9.03612	9.03581	9.7673	9.65326	9.69246	9.7393	9.16822	8.70462	8.78881	8.80155	8.74662	9.78571	8.92195	8.44745	8.57268	8.91943	8.68744	9.13936	9.31836	9.63769	9.46662	8.98013
Scin	NM_001146196	2	5.64386	5.64386	5.64386	8.47777	8.20976	8.36014	8.50797	8.42997	7.9598	8.52205	8.27938	8.27114	8.69326	8.28703	8.77806	7.13646	8.35661	7.81446	8.652	7.69287	6.89887	6.36686	7.23967	6.86949	6.44933	7.37948	7.38368	7.23408	6.70509	7.5069	8.76679	8.07736	7.0641
Scml4	NM_172938	2	5.7121	5.64386	5.64386	7.74754	7.77467	7.5092	7.7513	8.0009	7.67589	7.84927	7.54258	7.95367	8.07637	7.25947	7.28101	6.47362	8.04866	7.242	7.70033	7.35858	7.15428	6.41349	6.38735	7.32583	6.96315	7.56272	7.40597	7.11602	6.64108	7.07192	7.78207	7.54317	6.61316
Scrn2	NM_146027	2	5.83958	5.79738	5.99012	7.88515	7.94054	7.40919	7.47832	7.65361	7.61691	7.90657	7.58896	7.11955	7.86381	7.97808	7.72378	7.04505	7.88353	6.83937	7.71506	7.08309	7.39968	7.30777	7.44898	7.64811	7.21493	7.41169	7.88994	7.14645	6.67344	7.68341	8.67637	8.38449	7.76574
Sdc1	NM_011519	2	5.95673	5.79738	5.69872	10.6313	10.1334	10.6974	10.5495	10.5491	10.2819	9.85815	10.135	9.80213	10.705	9.51083	9.67168	8.2518	9.89495	9.92423	10.2751	8.92205	9.7408	8.79144	9.55948	8.23354	8.65631	9.03223	8.83981	9.60543	7.83829	10.1011	10.2026	9.63784	10.5725
Sdc2	NM_008304	2	5.64386	5.64386	5.64386	8.4705	8.13565	8.44676	8.24442	8.59484	8.45927	8.39436	8.53292	8.55037	8.94187	9.42317	8.70841	7.55617	8.50044	7.05469	8.19663	7.47883	7.87586	7.30777	7.20712	7.35561	7.24757	8.06604	8.36979	7.62837	6.79608	7.84066	7.67939	7.52146	7.84301
Sdc4	NM_011521	2	5.77724	5.64386	5.85175	9.60643	9.17417	9.77747	9.60621	9.73327	9.42843	9.24646	8.96794	8.92303	9.84844	10.595	10.5472	10.6865	10.4618	9.32154	9.02149	8.50709	8.29524	8.31462	9.16117	9.36425	8.8494	8.55837	8.54068	8.3045	8.74176	9.49101	10.3203	9.96184	9.01394
Sdr39u1	NM_001082975	2	6.16583	6.06268	5.94544	8.2247	8.22413	8.43833	8.29182	8.3046	7.91853	8.06593	8.19194	7.94404	8.71347	7.87613	8.26979	7.48839	8.48899	7.6254	7.94493	7.35858	7.55972	7.61758	7.99795	7.46895	7.61578	7.59112	7.63079	7.59566	6.73606	8.23001	9.00302	8.34794	7.76574
Sdsl	NM_133902	2	5.64386	5.72266	5.69872	8.56228	8.23836	8.25842	8.24442	8.67071	8.24781	8.01474	8.31293	8.18383	8.55079	7.44894	7.94584	6.94746	8.15395	7.05469	8.23803	7.15704	7.68073	7.78652	7.55623	8.4833	8.36061	7.77565	8.41445	7.56219	7.38998	7.27457	8.45337	8.17794	6.92887
Sel1l3	NM_172710	2	5.64386	5.64386	5.64386	8.69923	8.29393	8.75588	8.3822	8.44085	8.52033	8.60515	8.3074	8.15072	8.60227	8.07331	8.06209	7.41726	8.51181	8.17801	8.62104	7.53538	7.21965	7.4262	7.13975	7.32583	6.7057	7.82431	7.36105	6.88286	6.60798	6.83609	8.35686	7.86964	6.61316
Selenom	NM_053267	2	7.74604	7.26547	7.42683	10.2318	9.72703	10.6175	9.65537	10.3927	9.46473	10.1973	10.089	10.0756	10.6948	10.8003	11.1153	9.84252	10.861	9.21371	9.69937	9.43444	9.557	9.35434	10.2603	9.53666	9.99723	9.75753	9.95678	9.54675	9.36911	10.8916	10.947	10.7069	10.595
Sema4g	NM_011976	2	5.64386	5.64386	5.64386	11.3565	11.6762	11.76	11.5723	11.5489	11.1752	10.636	10.5943	11.5422	11.1855	10.914	11.2166	9.773	11.3228	10.9752	10.8877	8.78881	8.72482	8.58288	8.70545	9.56881	7.45741	9.16095	9.35135	9.14855	7.88048	8.64997	10.087	9.50031	7.6841
Sema5a	NM_009154	2	5.64386	5.64386	5.64386	8.38025	8.37346	7.60272	7.58366	7.61573	8.23104	8.47232	8.42967	8.26342	7.54096	8.00248	8.16967	7.68287	9.24896	6.83937	8.25829	8.15667	7.37119	6.87987	7.03239	7.98944	7.27948	7.96115	8.0959	7.53944	6.60798	8.35447	8.27119	9.15029	7.18774
Serf1	NM_011353	2	6.39067	6.52521	6.11636	7.93883	8.16575	8.19977	8.41112	7.29457	7.30082	7.80978	7.89244	8.24785	7.78962	8.09616	7.88399	7.34245	8.29217	7.55644	7.85468	7.08309	7.21965	7.0954	8.05392	7.52245	7.03969	7.53375	7.59243	7.14645	6.9091	7.65948	7.31854	7.47703	5.95359
Serinc2	NM_172702	2	5.64386	5.79738	5.64386	9.47452	9.65988	9.97695	9.21351	9.93519	9.52326	9.55194	9.47225	9.25442	9.83928	9.2808	9.48434	8.29211	9.60251	8.46814	9.13541	7.87922	7.74875	7.15149	8.0355	8.37113	7.59056	8.04566	8.20161	7.61755	7.20312	8.21366	9.40812	8.84409	6.92887
Serpina3n	NM_009252	2	5.64386	5.64386	5.64386	8.00072	8.19523	7.52521	8.76473	6.4352	7.18955	6.64129	7.50437	7.58372	9.6841	10.5251	8.53417	6.84278	7.45948	6.27888	7.84131	6.83531	6.93825	8.19959	6.55189	6.54696	6.39209	7.56272	7.33805	6.36685	6.70509	6.44624	6.71167	7.03119	5.95359
Serpinb6a	NM_009254	2	6.65617	6.8749	6.7305	11.7865	11.7661	11.5559	12.0022	12.2224	12.1247	11.4004	11.8356	11.7589	12.0781	11.3799	11.6257	10.5968	11.631	11.5548	11.8461	10.0243	9.59445	9.58571	9.98602	10.2893	10.3069	10.4849	10.5415	10.2505	9.24002	10.5052	11.2972	10.5602	9.63002
Sfn	NM_018754	2	6.47164	6.2867	6.30495	10.9146	9.98934	11.1463	10.996	10.9766	10.4115	10.3007	10.6631	10.7067	11.1513	10.6994	10.8108	9.58297	10.5825	12.2927	11.2895	8.78881	8.85396	8.33898	9.57232	9.24201	7.84632	9.15144	8.97266	8.18497	8.01283	9.28746	10.6691	9.96184	8.87368
Sgpp2	NM_001004173	2	5.64386	5.64386	5.64386	8.89662	8.41164	8.39541	8.63595	8.81144	8.92993	8.74783	8.43982	8.12539	8.95324	8.36438	8.33595	7.30353	8.64161	8.54134	8.96714	7.87922	7.77073	6.41349	8.01685	7.67198	6.65794	7.77565	6.84548	6.88286	6.9091	7.47982	8.63582	8.24571	7.0641
Sh2d4a	NM_028182	2	5.64386	5.64386	5.64386	9.1082	8.88855	8.72847	9.05768	8.58507	8.93338	8.2689	8.07948	8.63659	8.84139	8.30676	8.66494	7.65222	8.83496	7.75415	8.65963	6.83531	7.0858	7.37998	7.27149	7.84992	6.44933	7.53375	7.79179	7.39482	7.11162	7.10773	8.66969	8.09216	5.95359
Sh3bgrl2	NM_172507	2	5.64386	5.64386	5.64386	7.84072	7.54203	7.5092	7.55804	7.9099	7.43372	7.70603	7.703	7.18642	7.87582	6.83937	7.13998	6.32612	7.23105	7.69121	7.72965	6.42058	6.19204	6.66545	6.32805	6.1982	6.92332	7.09218	6.70873	6.49063	6.53941	6.74805	7.26636	7.03119	5.95359
Sh3d19	NM_001082414	2	6.0119	5.93612	5.85175	8.79549	8.18057	8.61333	8.57338	8.89289	8.79578	8.77884	8.34572	8.32407	8.75954	8.26703	7.84558	7.45326	8.12464	8.13135	8.97328	8.19228	7.95478	7.63736	7.27149	7.78574	7.24757	8.37454	8.21429	8.05465	6.9091	7.86178	8.38976	8.04728	6.61316
Shmt1	NM_009171	2	6.47164	6.2867	6.07549	8.36464	7.81321	8.16951	8.24442	8.10027	8.33405	8.4468	8.46491	7.75871	8.50515	7.61639	7.75174	6.84278	8.21084	8.26703	7.90694	7.96408	6.89887	6.9127	7.81568	7.80745	7.21493	7.37948	7.80862	6.6478	6.79608	7.45222	8.62894	8.33556	6.92887
Shroom3	NM_015756	2	5.64386	5.64386	5.69872	9.58974	9.36138	9.61488	9.71455	9.34476	9.85766	9.09861	8.96442	9.5366	9.37296	9.15584	9.23471	8.44297	9.5205	9.12124	9.58772	8.12015	8.41171	8.11748	8.6091	8.71923	7.03969	8.73419	8.72039	8.45798	7.52023	8.49632	9.52376	9.09256	8.0527
Sipa1l1	NM_001167983	2	7.79405	7.15614	7.21739	9.44143	8.90649	9.04958	9.36895	9.23032	9.24302	9.45925	8.9143	8.95694	9.29911	8.69896	8.87662	8.92544	9.26248	7.32727	9.33936	8.56257	8.5579	8.06002	8.38011	8.26527	7.37118	8.49965	8.87219	8.58562	8.16852	8.7998	8.94887	8.96966	8.0527
Slc12a2	NM_009194	2	5.7121	5.79738	5.75154	10.1014	9.45576	9.28881	9.42673	9.65604	10.141	9.85815	9.75655	9.63564	9.56312	8.24675	8.79832	7.77108	9.79617	8.08314	9.78216	9.69248	9.49233	8.67187	9.10045	10.1895	9.67015	9.75753	9.41867	8.60766	9.03738	9.39282	9.69474	9.90008	8.34604
Slc12a7	NM_011390	2	6.58516	6.61057	6.40728	8.23332	7.92302	8.59827	7.79583	8.36294	7.80985	7.72738	7.99933	7.99156	8.45803	8.54134	8.70126	8.31186	8.54537	8.13135	8.06481	8.47852	8.57049	8.11748	8.75131	8.08143	7.84632	8.35811	8.10954	7.8572	7.62322	8.23001	8.70279	8.54375	7.59756
Slc12a8	NM_134251	2	5.64386	5.64386	5.64386	8.41854	7.86916	7.81301	8.03749	8.32822	7.65929	8.42082	8.32942	8.02848	8.53573	8.02648	8.33595	7.13646	8.26556	6.44069	7.99409	7.47883	7.39968	7.03703	7.23967	7.29541	7.3107	7.47401	7.70457	7.19093	6.64108	7.4241	8.94887	8.55448	7.18774
Slc17a4	NM_177016	2	5.64386	5.64386	5.64386	7.93883	7.02286	7.61773	7.36468	7.81277	7.27924	7.5708	7.6339	7.66803	7.75104	7.21839	7.16099	6.54209	7.25829	7.75415	8.07627	7.35858	6.81675	7.20549	6.74561	7.54847	6.33251	7.37948	7.42792	6.75043	6.26993	6.99751	7.87792	7.28421	5.64386
Slc18b1	NM_183116	2	5.64386	5.72266	5.64386	7.90687	6.92065	8.4882	8.2604	8.10027	7.58208	7.34073	7.67747	7.17	8.36741	7.21839	7.62138	6.89607	8.00108	6.83937	7.68545	6.74225	6.97657	6.81188	6.87555	7.09812	7.00193	6.87838	6.84548	6.60462	6.39163	6.74805	7.85455	7.49942	5.95359
Slc1a1	NM_009199	2	5.64386	5.64386	5.64386	8.83567	8.50877	8.80261	8.90345	8.71618	8.46883	8.32601	8.37777	8.42444	8.65894	8.65345	8.73668	7.55617	8.98111	6.58616	8.30773	7.74176	7.58475	7.49285	7.20712	8.7532	7.42924	7.82431	8.40341	8.26343	7.06359	8.66206	10.0719	9.38481	7.0641
Slc1a4	NM_018861	2	5.64386	5.64386	5.80253	7.74754	6.56177	7.52521	6.65323	7.72652	7.47226	7.92517	8.13055	7.67968	8.46599	6.99339	7.07504	6.54209	7.28502	7.87235	7.42367	6.29515	6.81675	6.9127	7.10484	6.86949	6.20537	6.96773	7.16589	7.10056	6.50386	6.95882	7.09744	7.17719	6.92887
Slc22a1	NM_009202	2	5.64386	5.64386	5.64386	8.11705	7.69435	8.44676	7.03391	8.42997	7.88321	8.50978	7.98553	7.5587	8.48178	7.17611	7.89658	6.60745	8.04866	7.6254	7.99409	7.47883	7.05031	7.30777	7.63174	8.08143	6.7057	8.21945	8.02567	7.45685	7.01391	7.30574	8.72229	8.12132	6.20842
Slc25a1	NM_153150	2	8.07884	7.96172	8.33627	9.96316	9.38076	9.66271	9.77696	10.1591	10.0258	9.64465	9.36439	9.3668	10.2751	9.67163	10.0095	9.1059	9.8374	8.99663	9.29101	9.10135	8.80155	8.61316	9.41735	8.94173	9.3553	9.33055	9.37414	8.76304	8.32948	9.57656	10.4739	9.8874	9.17203
Slc27a4	NM_011989	2	8.27206	7.92886	7.94072	8.45584	8.30749	8.63563	8.62365	8.65211	8.33405	8.35374	8.88114	8.4175	8.86567	8.88107	8.80501	8.71914	8.88825	10.1633	8.8452	8.26098	8.34002	8.67187	8.24237	9.09084	8.59423	9.17039	9.1744	9.03113	8.09874	8.72106	10.1241	9.44947	7.91635
Slc30a4	NM_011774	2	5.7121	5.72266	5.64386	8.00072	7.31913	7.55671	7.20875	7.24579	8.05176	8.03201	8.08597	7.48092	6.93083	7.48403	7.77918	7.38034	7.61509	6.95104	7.99409	7.29448	7.42762	6.84627	6.74561	7.38479	6.75193	7.41169	7.36105	6.98743	6.53941	7.5069	7.6113	7.54317	6.92887
Slc34a2	NM_011402	2	5.64386	5.64386	5.64386	6.86194	6.84826	7.42634	7.24132	8.05852	8.07073	6.99827	6.30812	6.81597	6.73388	6.5393	6.41236	6.32612	6.62474	7.15138	6.80623	7.15704	6.48575	6.16364	6.69957	6.43981	6.7057	7.41169	6.19769	6.6478	6.46741	6.55401	8.18011	7.09137	5.95359
[truncated: 2,801 more rows]

## Sheet: Fig. 1F-H
Monocytes -> Engrafted macrophages day 4							Engrafted macrophages day 4 -> Engrafted macrophages day 8							Engrafted macrophages day 8 -> Engrafted macrophages day 12
[truncated: 9,133 more rows]

## Sheet: Fig. 2A
Annotation/Divergence	Transcript/RepeatID	FC colon	-log(Pv) colon		Annotation/Divergence	Transcript/RepeatID	FC ileum	-log(Pv) ileum
[truncated: 12,485 more rows]

[truncated: 4 more sheets: Fig. 3, Fig. 4A, Fig. 4B, Fig. 6B]
